# Supplementary material for: Parental high dietary arachidonic acid levels modulated the hepatic transcriptome of adult zebrafish (Danio rerio) progeny
Source: PLoS One. 2018 Aug 2;13(8):e0201278. doi: 10.1371/journal.pone.0201278 (PMC6071982; doi:10.1371/journal.pone.0201278)
Supplement: S8 Table — (CSV) [file pone.0201278.s013.csv]

Row.names	baseMean	log2FoldChange	lfcSE	stat	pvalue	padj	X_id	X_score	entrezgene	name	symbol	notfound
ENSDARG00000000019	503.540795126179	0.507991380784992	0.136376113754612	3.72492929149635	0.000195369975903968	0.00273630896887466	368425	14.839874	368425	ubiquitin-conjugating enzyme E2H (UBC8 homolog, yeast)	ube2h	NA
ENSDARG00000000068	153.223432305118	-0.553977860405286	0.206622257972479	-2.68111415411535	0.0073377480071129	0.0395272641645944	327272	14.833017	327272	solute carrier family 9, subfamily A (NHE3, cation proton antiporter 3), member 3 regulator 1a	slc9a3r1a	NA
ENSDARG00000000086	78.0092197431811	-1.13165518282347	0.177646265917527	-6.37027283955883	1.88692224336846e-10	2.82222999733444e-08	368504	14.8207245	368504	intersectin 1 (SH3 domain protein)	itsn1	NA
ENSDARG00000000103	840.355493840069	-0.584591024936682	0.155672089563409	-3.75527190889645	0.000173153390636297	0.00247463935573086	555454	14.823884	555454	myosin, heavy chain 10, non-muscle	myh10	NA
ENSDARG00000000212	39.1447141272699	-1.84949960285887	0.561351604510828	-3.29472577970194	0.000985177664331807	0.00925944717096962	436656	14.543775	436656	keratin 97	krt97	NA
ENSDARG00000000394	255.744573160378	0.394878064713724	0.142455682214036	2.77193621606774	0.0055723954323233	0.0323476620328686	556290	14.595437	556290	matrin 3-like 1.2	matr3l1.2	NA
ENSDARG00000000423	22.0383183264257	0.679364606935649	0.236501526501221	2.87255907810025	0.00407161942633705	0.0257451301409569	368688	14.852479	368688	si:ch73-314g15.3	si:ch73-314g15.3	NA
ENSDARG00000000489	162.26812885272	0.398406025928135	0.127602766564302	3.12223658354123	0.0017948264231494	0.0142960697675575	393929	14.838869	393929	UPF3B, regulator of nonsense mediated mRNA decay	upf3b	NA
ENSDARG00000000540	76.2889854359633	0.415467913639255	0.143114797431507	2.90303952558149	0.00369559992131964	0.023964850747791	368827	15.2045145	368827	asparagine synthetase domain containing 1	asnsd1	NA
ENSDARG00000000730	868.633577112846	0.483595444326038	0.183610525134363	2.63381112805027	0.00844324403101612	0.0436949600323624	368923	15.2045145	368923	solute carrier family 6 member 22, tandem duplicate 1	slc6a22.1	NA
ENSDARG00000000779	291.867013133497	0.473136291558222	0.104352605955988	4.5340151041151	5.78728878795459e-06	0.000161179318772574	317732	14.823164	317732	sec1 family domain containing 1	scfd1	NA
ENSDARG00000000837	107.549818766729	-0.786853994789459	0.150302871930247	-5.23512282023876	1.64875190295578e-07	9.22075914343697e-06	368424	15.207947	368424	sorting nexin 9a	snx9a	NA
ENSDARG00000000935	15.2195045770624	-0.888422083746556	0.287883743508839	-3.08604464051399	0.00202838367069145	0.0157019536389063	393205	14.544127	393205	unkempt family zinc finger	unk	NA
ENSDARG00000000966	353.129506430318	-0.669254025330779	0.145631846581085	-4.59551973721732	4.31671927847627e-06	0.000128179054065539	561503	14.542969	561503	nuclear receptor corepressor 2	ncor2	NA
ENSDARG00000001014	343.730654679338	-0.645037449871699	0.177766650755574	-3.62856276545714	0.000285003463774779	0.00368104153905271	561431	14.839825	561431	myosin, heavy chain 9b, non-muscle	myh9b	NA
ENSDARG00000001220	195.878354154855	-0.343764474103737	0.123254008106431	-2.78907338905273	0.00528590854221859	0.0311472675043668	368439	14.838869	368439	MYC binding protein 2	mycbp2	NA
ENSDARG00000001234	423.559258585522	0.782961610327283	0.207224052863533	3.77833364181377	0.000157881265915774	0.0023248178569112	678610	14.815266	678610	mitogen-activated protein kinase kinase kinase kinase 2	map4k2	NA
ENSDARG00000001452	13.2797485683423	-1.23615135228667	0.411015355064514	-3.00755516078624	0.00263358324931597	0.0189577308766863	368917	14.823164	368917	ADAM metallopeptidase domain 8a	adam8a	NA
ENSDARG00000001754	120.976277389573	1.31706683349354	0.272933849809477	4.82558991643188	1.39589468840099e-06	5.04813855223222e-05	58013	14.82419	58013	NOC2-like nucleolar associated transcriptional repressor	noc2l	NA
ENSDARG00000001818	2624.18776549093	-0.483254754013876	0.161098180255742	-2.99975302791572	0.0027019859600818	0.0192438655705956	566347	14.833097	566347	complement component c3b, tandem duplicate 2	c3b.2	NA
ENSDARG00000001870	123.378414389529	-0.908541867696209	0.351207075946185	-2.58691219488819	0.00968402659858785	0.0481523851022967	64615	14.837396	64615	ATPase Na+/K+ transporting subunit alpha 1a, tandem duplicate 4	atp1a1a.4	NA
ENSDARG00000001929	232.691625352389	-0.669005534707427	0.106123143334954	-6.30404936834428	2.89968065221508e-10	4.08484082576578e-08	494085	14.880566	494085	PTEN induced putative kinase 1	pink1	NA
ENSDARG00000001933	14.1133762813935	-1.27310047134649	0.354757957327521	-3.58864528631596	0.000332400736582473	0.0041323970057576	568316	14.8207245	568316	protein kinase, AMP-activated, gamma 2 non-catalytic subunit b	prkag2b	NA
ENSDARG00000002013	92.0639148584491	-0.999383386657478	0.222093854751129	-4.49982457991624	6.80095620176869e-06	0.000184469888435386	446167	14.593284	446167	growth factor receptor-bound protein 10a	grb10a	NA
ENSDARG00000002021	54.6864267382702	-0.92592135436962	0.194891588761202	-4.75095595584753	2.02457231184431e-06	6.87050239719716e-05	403051	14.837396	403051	phosphorylase, glycogen; brain	pygb	NA
ENSDARG00000002071	12.009754703593	-1.73331135552115	0.357801242931323	-4.8443413480647	1.27032375751612e-06	4.69206473241091e-05	550502	14.834426	550502	adenylosuccinate synthase	adss	NA
ENSDARG00000002082	381.199212360176	0.281416312991394	0.106892615175113	2.63270116958383	0.00847088413760767	0.0437949166919937	30502	14.595437	30502	casein kinase 2, alpha 1 polypeptide	csnk2a1	NA
ENSDARG00000002174	30.8835153537071	-0.612508808559912	0.236778990132804	-2.58683765910299	0.00968612154307033	0.0481523851022967	550607	14.824423	550607	integrin alpha FG-GAP repeat containing 2	itfg2	NA
ENSDARG00000002267	107.074626395154	0.70607337008248	0.160539595459235	4.39812600787182	1.09189582257416e-05	0.000272748822484247	393097	14.815489	393097	ddb1 and cul4 associated factor 13	dcaf13	NA
ENSDARG00000002299	67.1589946742813	-0.703218090462492	0.250299066755335	-2.80951143597303	0.00496167563601465	0.0297577724407512	100332997	14.834426	100332997	arylsulfatase H	arsh	NA
ENSDARG00000002305	33.0907892446908	-0.667882467987092	0.229927146458031	-2.90475691224656	0.0036753842894218	0.0239009035188129	492719	15.22285	492719	malic enzyme 3, NADP(+)-dependent, mitochondrial	me3	NA
ENSDARG00000002369	1235.0853534162	0.443484591995897	0.159458418999252	2.78119270703403	0.00541595773883607	0.0317283984555121	ENSDARG00000002369	14.838266	NA	si:ch211-202a12.4	UBB	NA
ENSDARG00000002396	50.3049156932417	-1.03331297246127	0.301872965400644	-3.42300600217665	0.000619327097621935	0.0066517267621363	402986	14.880566	402986	cryptochrome DASH	cry-dash	NA
ENSDARG00000002487	116.332165008701	0.7571401163123	0.185145858190807	4.08942508199135	4.32443711691503e-05	0.000845008962442349	321289	14.8804035	321289	NOC3-like DNA replication regulator	noc3l	NA
ENSDARG00000002538	131.422179409186	0.518193565520787	0.12439047034077	4.16586225698148	3.10177950989385e-05	0.000640171358813696	393168	14.82342	393168	SMU1, DNA replication regulator and spliceosomal factor a	smu1a	NA
ENSDARG00000002591	47.0356241810748	0.937608212466009	0.264916034183634	3.53926562186146	0.000401241896388145	0.00473157298377681	317679	14.543775	317679	RuvB-like AAA ATPase 1	ruvbl1	NA
ENSDARG00000002659	231.154335629741	0.663978570055164	0.192121112748123	3.45604166329008	0.000548170584703579	0.00604284498060406	334728	14.835131	334728	microtubule-associated protein, RP/EB family, member 1b	mapre1b	NA
ENSDARG00000002663	232.42508716814	0.431773831401346	0.107389757060651	4.02062397028694	5.80441937609351e-05	0.00107195946252093	336159	14.854555	336159	optineurin	optn	NA
ENSDARG00000002690	40.7632272894816	0.666062543431814	0.173926086942546	3.82957240711014	0.000128366110203338	0.00198694676534836	436784	14.854625	436784	RAB interacting factor	rabif	NA
ENSDARG00000002710	2912.01530213514	0.476741395419383	0.178815404496342	2.66610920218081	0.00767347629816109	0.0407558813468749	767714	14.82419	767714	nucleolin	ncl	NA
ENSDARG00000002731	1408.99568798105	-0.24387247008243	0.0827880795389555	-2.94574377664694	0.00322179159744385	0.0218421965321948	282667	15.2150755	282667	syndecan 2	sdc2	NA
ENSDARG00000002758	871.801845032819	-0.433619835078854	0.0973059741376397	-4.45625090259614	8.34054111798464e-06	0.000217302485256739	58125	14.82342	58125	death effector domain-containing 1	dedd1	NA
ENSDARG00000002764	2243.2402208563	-0.635545057986893	0.217744597926208	-2.91876383634682	0.00351422349240119	0.0232296190005458	571850	14.823164	571850	myo-inositol oxygenase	miox	NA
ENSDARG00000002791	1949.74387748131	0.550358960739782	0.152741032967154	3.60321617608894	0.000314303916426541	0.00394797985875647	64612	14.319826	64612	ATPase Na+/K+ transporting subunit alpha 1a, tandem duplicate 1	atp1a1a.1	NA
ENSDARG00000002909	161.490718048508	-0.52672324710486	0.201279740144843	-2.61687165695775	0.00887397001811953	0.0453812354451322	ENSDARG00000002909	14.853864	NA	tight junction protein 3	tjp3	NA
ENSDARG00000002917	81.8405713415403	-1.87819345239382	0.286651928239433	-6.55217449235162	5.67052259290609e-11	1.02534897332921e-08	556445	14.544127	556445	glutaminase 2b (liver, mitochondrial)	gls2b	NA
ENSDARG00000002967	115.433112372877	0.666353163708517	0.142238868319999	4.68474736602518	2.80305454164623e-06	8.96791988331234e-05	393179	15.2150755	393179	pdgfa associated protein 1b	pdap1b	NA
ENSDARG00000002968	3740.60407830696	-0.384209046058646	0.111226269026897	-3.45430130328057	0.000551720601415814	0.00607645007832053	562916	14.854625	562916	apobec1 complementation factor	a1cf	NA
ENSDARG00000002986	1393.08968592806	-0.77400150080382	0.174050657067479	-4.44698982379447	8.70819614184093e-06	0.000225426915082057	553701	15.22285	553701	guanine deaminase	gda	NA
ENSDARG00000003035	2448.94941349061	0.621864561352265	0.148971378854158	4.17438951116285	2.9878618127301e-05	0.000619827840089473	373085	14.543775	373085	heat shock protein 9	hspa9	NA
ENSDARG00000003087	101.512946394952	-0.493055170984569	0.189574222029183	-2.60085556837294	0.00929915956434636	0.0468827790770105	554960	14.880566	554960	UBX domain protein 6	ubxn6	NA
ENSDARG00000003098	308.340689759917	0.318244114142361	0.118929171697177	2.67591297913592	0.00745259927635068	0.0399505487756586	415256	14.827688	415256	lysine (K)-specific demethylase 5Bb	kdm5bb	NA
ENSDARG00000003205	91.6594186940386	0.578922500781972	0.132289880963131	4.37616616302889	1.20784951174511e-05	0.000296216535117248	553627	14.827688	553627	N-glycanase 1	ngly1	NA
ENSDARG00000003217	107.338972410369	1.18330646628035	0.293156782410631	4.0364287551187	5.42709961047888e-05	0.00101359646394399	570267	14.837396	570267	URB2 ribosome biogenesis 2 homolog (S. cerevisiae)	urb2	NA
ENSDARG00000003270	69.4358371361688	0.749460253560449	0.151347910491933	4.95190353883607	7.34910332433397e-07	3.05960092007925e-05	406329	14.8804035	406329	deoxyhypusine synthase	dhps	NA
ENSDARG00000003411	591.90917557661	0.444054842563178	0.122523997238477	3.6242275192743	0.000289826390631478	0.00371905192357641	30126	14.531645	30126	forkhead box A2	foxa2	NA
ENSDARG00000003475	40.7037328165805	-0.581208451603003	0.196541895230683	-2.95717333406617	0.00310473531657198	0.021274812420967	619193	14.835131	619193	sulfotransferase family 1, cytosolic sulfotransferase 5	sult1st5	NA
ENSDARG00000003495	36.3015586204077	-0.84556720005248	0.23751605042918	-3.56004235724104	0.000370794980574086	0.00447929202527282	100150917	14.819327	100150917	MAP-kinase activating death domain	madd	NA
ENSDARG00000003519	75.6703716641025	0.552404757626727	0.15718728765352	3.51430936860726	0.000440899001668828	0.00510658834150846	393641	14.880566	393641	adenine phosphoribosyltransferase	aprt	NA
ENSDARG00000003584	140.82390300223	0.453759191718206	0.13914990045451	3.26093795422116	0.00111044335807635	0.01005934942329	406470	14.827688	406470	phospholipase A2, group VII (platelet-activating factor acetylhydrolase, plasma)	pla2g7	NA
ENSDARG00000003681	1060.88992960814	0.392242189884946	0.0908278682746406	4.31852246822423	1.57077233472429e-05	0.000372062084006835	322256	14.593083	322256	eukaryotic translation initiation factor 5	eif5	NA
ENSDARG00000003693	350.63433716258	0.505797767581188	0.117891884478915	4.29035272289375	1.78389557829065e-05	0.000411655141542689	447847	15.207947	447847	histidyl-tRNA synthetase	hars	NA
ENSDARG00000003776	272.186617073014	-0.492328870131775	0.174274214867268	-2.82502417530181	0.00472770488424639	0.028772725165017	560360	14.842841	560360	phosphatidylinositol-5-phosphate 4-kinase, type II, alpha a	pip4k2aa	NA
ENSDARG00000003811	1036.42689504451	-0.268630858577333	0.0934671195503888	-2.87406801311035	0.00405221689847602	0.0256492203370099	561433	14.833816	561433	plexin b2a	plxnb2a	NA
ENSDARG00000003829	141.760467030593	0.53311782862608	0.106909558485497	4.98662454675089	6.14433031470129e-07	2.66804880869556e-05	570248	15.2045145	570248	UDP-N-acetyl-alpha-D-galactosamine:polypeptide N-acetylgalactosaminyltransferase 2	galnt2	NA
ENSDARG00000003835	168.48171566377	-0.497058973013927	0.159492177809768	-3.1165100372934	0.00183005450451377	0.0145003991642801	81534	14.852479	81534	stomatin	stom	NA
ENSDARG00000003854	27.9715522091531	-1.63470125836951	0.432301940557944	-3.78138774084544	0.00015595654630454	0.00230697626187973	445175	14.823884	445175	acyl-CoA synthetase long chain family member 1b	acsl1b	NA
ENSDARG00000003910	120.667083484745	-0.342978458819239	0.113223879209827	-3.02920604039392	0.00245197394707033	0.0180691389104361	564707	14.544127	564707	mediator complex subunit 13b	med13b	NA
ENSDARG00000003920	451.516559541852	0.449861527709472	0.142888381887007	3.14834223586639	0.00164199329557858	0.0133687827795258	321714	14.82419	321714	SET nuclear proto-oncogene b	setb	NA
ENSDARG00000003927	317.801820553954	0.390450490133566	0.131415750819738	2.97110877271587	0.00296726665530958	0.0205894415409761	81593	14.834426	81593	claudin 12	cldn12	NA
ENSDARG00000003941	125.058603366465	1.46416411706391	0.363892733826079	4.02361460111951	5.73116761131896e-05	0.00106004726123861	337399	14.853864	337399	RRS1 ribosome biogenesis regulator homolog (S. cerevisiae)	rrs1	NA
ENSDARG00000003952	1034.44532714501	-0.43518799666301	0.107286494887997	-4.05631666052033	4.98526608052725e-05	0.000946653582532721	394235	14.543775	394235	profilin 2	pfn2	NA
ENSDARG00000003961	55.4632249180196	-0.710416190868474	0.252194937472065	-2.81693279805493	0.00484846693092584	0.0292963475651704	335495	14.842841	335495	poly (ADP-ribose) polymerase family, member 3	parp3	NA
ENSDARG00000003974	127.165238444594	0.872674352699791	0.241320390786118	3.61624788463583	0.000298904156941872	0.0038087169696254	558170	14.593083	558170	speckle-type POZ protein-like b	spoplb	NA
ENSDARG00000004094	51.1902412407093	-0.976432558546441	0.377736852601712	-2.58495445128304	0.00973918625627242	0.0483480175576905	335159	14.837396	335159	acyl-CoA synthetase bubblegum family member 2	acsbg2	NA
ENSDARG00000004105	72.4158382694713	-0.676344852972129	0.152750417096785	-4.42777745440516	9.52090600003377e-06	0.00024283321303244	30746	14.842841	30746	endothelium-specific receptor tyrosine kinase 1	tie1	NA
ENSDARG00000004111	38.8835561724416	1.81165086577888	0.356812796816982	5.07731472060438	3.82806496932417e-07	1.81160183997509e-05	259252	14.82342	259252	estrogen receptor 1	esr1	NA
ENSDARG00000004115	25.4362026410849	-0.959414515441344	0.356410748370592	-2.69187873774153	0.00710507738402709	0.0385726278698031	431727	14.853864	431727	mannosyl (alpha-1,3-)-glycoprotein beta-1,4-N-acetylglucosaminyltransferase, isozyme B	mgat4b	NA
ENSDARG00000004171	222.679583333207	0.336548467020717	0.108114149475652	3.11289936287674	0.00185259177810327	0.0146339373389693	407650	14.543792	407650	Rab acceptor 1 (prenylated)	rabac1	NA
ENSDARG00000004174	455.373563378796	0.267788807937461	0.0884124073896358	3.0288600417508	0.00245478377419395	0.0180788482822856	448949	14.82342	448949	CCR4-NOT transcription complex, subunit 1	cnot1	NA
ENSDARG00000004211	450.675089725243	-0.521644343842864	0.139843732625823	-3.73019465404728	0.000191331894435219	0.00268596280542604	503526	14.815266	503526	coiled-coil domain containing 106a	ccdc106a	NA
ENSDARG00000004301	22.1190199280121	-0.709058606136027	0.267249848178389	-2.65316747967891	0.00797402946139993	0.041965841409583	336933	14.837396	336933	ras homolog family member Gb	rhogb	NA
ENSDARG00000004308	79.2330113097924	0.42069412265565	0.150765994728342	2.79037805185234	0.00526465286068367	0.0310626927707883	548347	14.543775	548347	family with sequence similarity 8, member A1b	fam8a1b	NA
ENSDARG00000004318	55.6792693009711	0.786122024676517	0.174608182144857	4.50220611096187	6.72517140031326e-06	0.000183090902280438	406536	14.542969	406536	COBW domain containing	cbwd	NA
ENSDARG00000004336	42.1165191227268	-0.740368405615108	0.216474279557161	-3.42012181368462	0.000625931004496458	0.00669889939882914	559866	14.838869	559866	exocyst complex component 4	exoc4	NA
ENSDARG00000004363	41.6531245486292	0.612149177194756	0.204962293029907	2.98664289975246	0.0028205898130847	0.0199053566216883	494110	14.833489	494110	LHFPL tetraspan subfamily member 6	lhfpl6	NA
ENSDARG00000004377	34.0555946320605	-0.579508988099181	0.212358933801663	-2.72891268441019	0.00635435264969012	0.0354923846708141	563577	14.82342	563577	protein phosphatase 1, regulatory subunit 13Ba	ppp1r13ba	NA
ENSDARG00000004470	677.437465465431	0.542816745372516	0.180964194188884	2.99958092707525	0.0027035129344741	0.0192438655705956	394028	14.544127	394028	protein kinase C substrate 80K-H	prkcsh	NA
ENSDARG00000004517	38.4714563485107	0.93936999966966	0.263093400699787	3.57048104274408	0.000356326243369086	0.00434791849388519	572027	14.546301	572027	phosphoribosyl pyrophosphate amidotransferase	ppat	NA
ENSDARG00000004529	15.4754805942566	-0.938109127053367	0.364912369807853	-2.57077919158327	0.0101470000518675	0.0499258808101605	334557	14.833097	334557	zgc:173742	zgc:173742	NA
ENSDARG00000004634	86.6952663990548	-0.605866816328749	0.142500234928886	-4.2516899472559	2.1216345477251e-05	0.000467338228103448	564372	14.833816	564372	oxysterol binding protein	osbp	NA
ENSDARG00000004692	106.937524679101	0.753002322247987	0.245236765241086	3.0705115585248	0.00213692414895941	0.0162822868331089	494100	14.593083	494100	nucleic acid binding protein 1a	nabp1a	NA
ENSDARG00000004696	93.2717390827449	0.465958019100281	0.138115264005958	3.37368952268866	0.00074167970392833	0.00755714853918563	641497	15.22285	641497	eukaryotic elongation factor, selenocysteine-tRNA-specific	eefsec	NA
ENSDARG00000004727	46.8929566940592	0.706925699340883	0.246486387017845	2.86801112180569	0.00413061012921954	0.0260230586144018	450027	14.544127	450027	cms1 ribosomal small subunit homolog (yeast)	cmss1	NA
ENSDARG00000004735	515.65536243937	0.416639624982128	0.157378304190119	2.64737650546044	0.00811189819994449	0.0424883902690564	334490	14.880566	334490	heterogeneous nuclear ribonucleoprotein Ub	hnrnpub	NA
ENSDARG00000004754	461.259424637858	1.32991883537837	0.342556961406509	3.88232902906963	0.000103460755987222	0.00167756199501527	335865	14.854625	335865	heat shock protein 4a	hspa4a	NA
ENSDARG00000004771	70.5731423053666	-0.596698662214264	0.169585473852812	-3.51857177774646	0.000433876427063653	0.00503970557418615	559527	14.854555	559527	ankyrin repeat domain 10b	ankrd10b	NA
ENSDARG00000004774	141.792324064348	1.22452257290917	0.213734760479381	5.72916904186625	1.00923785410026e-08	8.67157205845721e-07	321745	14.595437	321745	WD repeat domain 36	wdr36	NA
ENSDARG00000004830	157.906824147453	-0.544849214523548	0.131586401014745	-4.14061947375926	3.46369145637872e-05	0.000700544607579769	245698	14.592722	245698	flotillin 2a	flot2a	NA
ENSDARG00000004906	333.959849073751	0.535177199715502	0.182404767408803	2.93400883824528	0.00334614680008243	0.0224341828904254	493606	14.838869	493606	stress-induced phosphoprotein 1	stip1	NA
ENSDARG00000004930	235.636520783506	-0.589640725093477	0.112544990631469	-5.23915566374935	1.61312930537262e-07	9.08979606259965e-06	553341	14.815266	553341	LIM domain 7a	lmo7a	NA
ENSDARG00000004952	120.971190390174	-0.647370416119161	0.225309648644917	-2.8732476394715	0.00406275517585454	0.0257024955381085	570456	14.833816	570456	radical S-adenosyl methionine domain containing 2	rsad2	NA
ENSDARG00000005112	229.59422395917	-1.13836288451558	0.375698546729138	-3.02999011954202	0.00244561739207473	0.0180332651886704	378452	14.834426	378452	cadherin 17, LI cadherin (liver-intestine)	cdh17	NA
ENSDARG00000005122	723.721190452768	0.515076327449996	0.190330636873247	2.70621869348873	0.00680542126746509	0.0373912374854148	568265	14.833017	568265	ATPase sarcoplasmic/endoplasmic reticulum Ca2+ transporting 2b	atp2a2b	NA
ENSDARG00000005128	26.4503420109032	-0.689125452526271	0.2517262206164	-2.73759901069828	0.0061889487097232	0.0347286306708182	393241	14.838869	393241	ribonuclease H2, subunit B	rnaseh2b	NA
ENSDARG00000005134	168.305266352483	1.03321678731656	0.281071419381049	3.67599377265688	0.000236925301776498	0.00318573810324336	322265	14.825785	322265	proteasome 26S subunit, non-ATPase 11b	psmd11b	NA
ENSDARG00000005163	421.18842690381	-0.768293166716102	0.13413151988903	-5.72790919950604	1.01675959691951e-08	8.6746778286478e-07	393800	14.842841	393800	EFR3 homolog A (S. cerevisiae)	efr3a	NA
ENSDARG00000005179	17.1637370999051	-1.17709816802249	0.313663908733779	-3.75273703874407	0.000174914308260711	0.00249597979337869	560387	14.880964	560387	D-glutamate cyclase	dglucy	NA
ENSDARG00000005186	39.3358139348305	-0.827066208113134	0.234510014299193	-3.52678417842721	0.000420639489669156	0.00491038019554654	387291	14.591863	387291	sp4 transcription factor	sp4	NA
ENSDARG00000005210	18.4031986468087	-1.30125939114026	0.424511388091616	-3.06531091424908	0.00217443822584599	0.0164645744413276	323538	14.82419	323538	coronin, actin binding protein, 2A	coro2a	NA
ENSDARG00000005220	36.3009659490135	-0.594858258420997	0.212588337016488	-2.79816977153767	0.00513930918224837	0.0305658962901026	393925	14.852479	393925	programmed cell death 6	pdcd6	NA
ENSDARG00000005230	1225.47615408551	0.312998149663978	0.0981541545055027	3.18884260417557	0.00142843630329951	0.0120774863651981	83414	14.835336	83414	signal sequence receptor, beta	ssr2	NA
ENSDARG00000005254	922.075083228928	0.367006489365135	0.132846067151427	2.76264474541648	0.00573351333603761	0.0329201488464908	373129	14.815489	373129	KDEL (Lys-Asp-Glu-Leu) endoplasmic reticulum protein retention receptor 2a	kdelr2a	NA
ENSDARG00000005318	251.556470985188	0.407663498445296	0.086132060881372	4.73300527438631	2.21219738207569e-06	7.38313258508183e-05	492497	14.543792	492497	signal transducing adaptor molecule (SH3 domain and ITAM motif) 2	stam2	NA
ENSDARG00000005350	374.180813565808	-0.440115836517992	0.149449954289889	-2.94490445720911	0.00323054404311123	0.0218892847216401	405899	14.543775	405899	disco-interacting protein 2 homolog Ba	dip2ba	NA
ENSDARG00000005382	49.1854273459634	0.525751949927842	0.169745981320174	3.09728657985824	0.00195300968187032	0.0152649756747477	393876	14.833816	393876	PR domain containing 9	prdm9	NA
ENSDARG00000005423	2034.33395847406	0.246144682733132	0.0933737634339931	2.63612254321455	0.00838594406107899	0.0434169710683641	323107	14.854555	323107	phosphoglycerate mutase 1a	pgam1a	NA
ENSDARG00000005425	19.9946515396582	-1.31813825645437	0.245379566520675	-5.37183382929854	7.793991646244e-08	4.74493511528875e-06	474326	14.833489	474326	WD repeat and FYVE domain containing 1	wdfy1	NA
ENSDARG00000005451	2198.19341947458	0.170625695731431	0.0617486787863612	2.76322828415104	0.00572327222122835	0.032917557849586	323765	14.880566	323765	GDP dissociation inhibitor 2	gdi2	NA
ENSDARG00000005463	261.747979500611	0.820517675891923	0.180411505927724	4.54803407173287	5.41493704286284e-06	0.000153230646656985	393853	14.839825	393853	solute carrier family 30 (zinc transporter), member 1a	slc30a1a	NA
ENSDARG00000005464	63.9687598400194	-0.539401739290338	0.195235566723189	-2.76282517752064	0.00573034498594938	0.032917557849586	792196	14.595437	792196	deoxyribonuclease I-like 1	dnase1l1	NA
ENSDARG00000005482	123.501756495321	-0.466922623630072	0.181586533376277	-2.57135050132012	0.0101302742422873	0.0498768852364667	557693	14.823164	557693	Rap guanine nucleotide exchange factor (GEF) 2	rapgef2	NA
ENSDARG00000005525	192.741657034312	-0.537129960757753	0.137089625317948	-3.91809343348925	8.92521126767725e-05	0.00151653484583324	436619	14.82921	436619	aspartoacylase (aminocyclase) 3, tandem duplicate 2	acy3.2	NA
ENSDARG00000005578	2130.28741229056	-0.505342091441105	0.121406931079425	-4.16238255055232	3.14944142197417e-05	0.000647774075878419	555748	14.8804035	555748	UDP-glucose pyrophosphorylase 2a	ugp2a	NA
ENSDARG00000005612	155.890401320845	0.399363349849579	0.142836992801366	2.7959378170678	0.00517493562101014	0.0307325220826166	386808	14.823164	386808	APH1B gamma secretase subunit	aph1b	NA
ENSDARG00000005652	440.092493784349	0.505284447472243	0.178580339773011	2.82945170848313	0.00466278363188087	0.0284907824590566	566078	14.825805	566078	mannosidase, alpha, class 1A, member 1	man1a1	NA
ENSDARG00000005699	202.717514416402	0.703959859762758	0.160274130239062	4.3922238649041	1.12197083992092e-05	0.000279110405043981	192339	14.823151	192339	DEAD/H (Asp-Glu-Ala-Asp/His) box polypeptide 19 (DBP5 homolog, yeast)	ddx19	NA
ENSDARG00000005704	22.1839038564964	-1.77582777827249	0.576515132483846	-3.08027955939603	0.00206806380482019	0.0159380362566136	393332	14.815489	393332	EPS8-like 3b	eps8l3b	NA
ENSDARG00000005713	91.5221275110171	-0.476624793598948	0.165938198496217	-2.87230304967914	0.00407491990338171	0.0257525584921593	405865	14.833489	405865	ethylmalonic encephalopathy 1	ethe1	NA
ENSDARG00000005738	78.028134304525	0.929024911560184	0.234364981868283	3.96400906037366	7.37014532860299e-05	0.00130539927859686	415250	14.543792	415250	ribosome production factor 1 homolog	rpf1	NA
ENSDARG00000005754	629.516930197985	-0.465429820297628	0.101719363171394	-4.57562656495786	4.74796817959102e-06	0.000137941569534161	799867	14.842841	799867	protein tyrosine phosphatase, receptor type, f, b	ptprfb	NA
ENSDARG00000005774	958.712003594063	0.652443237516599	0.165354903915447	3.94571447273327	7.95623789369013e-05	0.00138094300977157	30116	14.824423	30116	DEAD (Asp-Glu-Ala-Asp) box helicase 3b	ddx3b	NA
ENSDARG00000005789	675.045349867829	0.670482331881553	0.18945957317441	3.53892031237889	0.000401767115501595	0.00473157298377681	562399	15.2045145	562399	ectonucleotide pyrophosphatase/phosphodiesterase 1	enpp1	NA
ENSDARG00000005945	299.73534499538	0.431267430483427	0.109464004783106	3.93981045493402	8.15460123710382e-05	0.0014053057466218	436946	14.827688	436946	SART1, U4/U6.U5 tri-snRNP-associated protein 1	sart1	NA
ENSDARG00000005989	41.9783318962096	-0.584638157703725	0.203756247657885	-2.86930174865291	0.00411379132456994	0.025971121363817	402933	15.2045145	402933	ral guanine nucleotide dissociation stimulator-like 1	rgl1	NA
ENSDARG00000006031	359.604950859812	-1.29455943240744	0.205796227744099	-6.29049155369936	3.16462269503016e-10	4.40682804026326e-08	378968	14.8207245	378968	4-aminobutyrate aminotransferase	abat	NA
ENSDARG00000006038	59.3832577137562	0.863578710226638	0.261427977874902	3.30331404177359	0.000955493179574756	0.00908409635695193	406815	15.2150755	406815	AE binding protein 2	aebp2	NA
ENSDARG00000006052	14.9620488629019	-0.842684611938722	0.321032170721442	-2.62492263639807	0.00866686570298569	0.0445899284584695	259196	14.815266	259196	MALT paracaspase 2	malt2	NA
ENSDARG00000006062	351.031511111599	0.456944325597547	0.153796215106961	2.97110254163119	0.00296732686178657	0.0205894415409761	556208	14.82921	556208	A kinase (PRKA) anchor protein 1b	akap1b	NA
ENSDARG00000006128	24.0750080462607	-0.768398992586644	0.274591572642931	-2.79833421394124	0.00513669314171923	0.0305653425402399	557463	14.831809	557463	centrosomal protein 170Aa	cep170aa	NA
ENSDARG00000006192	112.033142438181	0.56130533515804	0.147472871155183	3.80615994495278	0.000141141125704134	0.00214008102366155	405852	15.22285	405852	GATA zinc finger domain containing 2Ab	gatad2ab	NA
ENSDARG00000006200	895.931054916905	0.622937594163061	0.177877603340764	3.50205749607322	0.000461679977289355	0.00528163637852741	572435	14.842841	572435	eukaryotic translation initiation factor 4 gamma, 1a	eif4g1a	NA
ENSDARG00000006207	75.6266426257595	-1.67315814922776	0.65064776606023	-2.57152677148034	0.0101251186699157	0.0498768852364667	ENSDARG00000006207	14.833489	NA	glutathione peroxidase 1b	gpx1b	NA
ENSDARG00000006219	198.352308775029	1.29459367699554	0.262228395130092	4.93689356697351	7.93767613463349e-07	3.23128878487328e-05	321897	14.833489	321897	guanine nucleotide binding protein-like 3 (nucleolar)	gnl3	NA
ENSDARG00000006225	155.869648980876	0.386621131164668	0.131558557310089	2.93877600263878	0.00329511124328022	0.0222273233364921	325550	15.209884	325550	DEAD (Asp-Glu-Ala-Asp) box polypeptide 39Aa	ddx39aa	NA
ENSDARG00000006257	64.1288840180577	-2.30416755855223	0.269343286269246	-8.55476143648479	1.18112743900749e-17	9.53957261571718e-15	393897	14.815266	393897	very low density lipoprotein receptor	vldlr	NA
ENSDARG00000006266	522.629306467363	-0.319059435407973	0.0977182468078693	-3.26509578129557	0.00109427066939491	0.0099677362103153	30768	14.839825	30768	signal transducer and activator of transcription 1a	stat1a	NA
ENSDARG00000006341	144.401691561633	-1.67071625084857	0.2242434016015	-7.45045891614494	9.30161038535601e-14	3.31438264172318e-11	562318	14.815489	562318	taste receptor, type 1, member 3	tas1r3	NA
ENSDARG00000006389	155.452830075367	0.340126520257156	0.117475064927371	2.89530821257633	0.00378786415025424	0.0244355560065656	30639	14.837396	30639	SMAD family member 2	smad2	NA
ENSDARG00000006395	263.872147806116	0.332230192438054	0.11232713605314	2.95770197756029	0.00309941621573185	0.0212563141080233	327336	14.835336	327336	RNA binding motif protein 25b	rbm25b	NA
ENSDARG00000006408	481.753212517631	0.461557125130567	0.119069527768688	3.87636647074989	0.000106027953630794	0.00169911198179507	550466	14.842841	550466	high mobility group box 3b	hmgb3b	NA
ENSDARG00000006420	98.8980274176852	-0.532076571071177	0.135658698290752	-3.92217069583551	8.77547850371491e-05	0.00149318710775992	569196	14.833489	569196	attractin-like 1b	atrnl1b	NA
ENSDARG00000006598	103.419779557435	1.81758153360356	0.390910603237931	4.64960919081868	3.32564583275438e-06	0.000103308203240562	559050	14.880566	559050	serum/glucocorticoid regulated kinase 2b	sgk2b	NA
ENSDARG00000006642	181.124563530659	0.302734872137042	0.11657370257718	2.59693966515827	0.0094058444185441	0.0472067376364449	323355	15.207947	323355	developmentally regulated GTP binding protein 2	drg2	NA
ENSDARG00000006840	2240.32507536129	0.285038987721277	0.092790583281658	3.07185252684602	0.00212734798615674	0.0162310058428881	403338	14.880566	403338	glycine N-methyltransferase	gnmt	NA
ENSDARG00000006848	27.6295072997615	-0.589486247964211	0.226471774541971	-2.60291265503801	0.00924354999929055	0.0466995864226043	799852	14.815489	799852	si:ch211-219a4.6	si:ch211-219a4.6	NA
ENSDARG00000006859	13.974903672134	-1.41870541180365	0.344768098450519	-4.11495558370886	3.8725397697211e-05	0.00077037470131644	393517	14.593284	393517	sodium/potassium transporting ATPase interacting 1	nkain1	NA
ENSDARG00000006900	162.321039224883	1.15479927014313	0.294969188764794	3.91498269693501	9.0410691419382e-05	0.00152861508327245	317745	14.82342	317745	IMP (inosine 5'-monophosphate) dehydrogenase 2	impdh2	NA
ENSDARG00000006963	76.6418730285669	0.871569792096928	0.237094787691977	3.67603944642271	0.000236882910654563	0.00318573810324336	30707	14.834426	30707	CSE1 chromosome segregation 1-like (yeast)	cse1l	NA
ENSDARG00000007034	195.417060983621	0.766756048420351	0.153395003238449	4.99857252343771	5.77562840297531e-07	2.53520790224804e-05	406264	14.823884	406264	heterogeneous nuclear ribonucleoprotein K, like	hnrpkl	NA
ENSDARG00000007065	104.804226811105	0.554293247636678	0.174044366972006	3.18478131340978	0.00144863434863189	0.0121961119761468	550455	15.22285	550455	mitochondrial ribosomal protein S18B	mrps18b	NA
ENSDARG00000007077	79.4592243691427	-0.872325227554428	0.247464766186911	-3.52504819573207	0.000423405750508055	0.00493226987250489	449857	14.827688	449857	si:dkey-145p14.5	si:dkey-145p14.5	NA
ENSDARG00000007081	185.975166540108	0.365815861250841	0.107447126209584	3.40461280032086	0.00066257928986753	0.00695809802267094	406712	15.22285	406712	protein inhibitor of activated STAT, 4a	pias4a	NA
ENSDARG00000007129	13.1724426618465	-1.23438972455576	0.336673393944989	-3.66643086966788	0.000245959370624519	0.00327090864447426	555229	14.824423	555229	solute carrier family 6, member 16a	slc6a16a	NA
ENSDARG00000007130	82.6281340467996	0.942536676625788	0.205455630901312	4.58754365840927	4.48491657669146e-06	0.000132523815430773	550350	14.82342	550350	MRT4 homolog, ribosome maturation factor	mrto4	NA
ENSDARG00000007216	568.288549571941	0.599833183494737	0.150738294103899	3.97930192231905	6.9117918914161e-05	0.00123687383699418	406324	14.542969	406324	ATP-binding cassette, sub-family E (OABP), member 1	abce1	NA
ENSDARG00000007285	66.9873004351208	0.505594358351818	0.178095459340565	2.83889527685818	0.00452700114022439	0.0278965507699992	ENSDARG00000007285	14.838869	NA	mitochondrial ribosomal protein L57	mrpl57	NA
ENSDARG00000007320	10275.7877046253	-0.230802252149079	0.0888618531235744	-2.59731531625969	0.0093955630449368	0.0472067376364449	336710	14.823151	336710	ribosomal protein L7	rpl7	NA
ENSDARG00000007323	261.173242527563	0.318626886364158	0.0986784417389999	3.22894120285069	0.00124249437375206	0.0109078401000045	406766	15.2045145	406766	charged multivesicular body protein 4Bb	chmp4bb	NA
ENSDARG00000007366	1464.57716296515	-0.236743018982155	0.0795855498044288	-2.97469854218411	0.00293276600952911	0.0205022851733671	402826	14.82921	402826	si:ch73-71d17.1	si:ch73-71d17.1	NA
ENSDARG00000007371	30.8846876638899	-2.54449000370276	0.922291931728712	-2.75887700647392	0.00580003599378025	0.0332191039453807	563962	14.544415	563962	solute carrier family 26 (anion exchanger), member 3	slc26a3.1	NA
ENSDARG00000007409	56.8974089885595	0.59695704972507	0.174877788372134	3.41356701318047	0.000641183877002486	0.00680083370823697	447887	14.880566	447887	peptidylprolyl isomerase Fa	ppifa	NA
ENSDARG00000007429	40.3909620572383	0.597434217082404	0.216818274354201	2.75546062185892	0.005860955904586	0.033398626897488	393621	14.595437	393621	NADPH dependent diflavin oxidoreductase 1	ndor1	NA
ENSDARG00000007449	317.886891473435	0.975699401029324	0.31593386093378	3.08830271673168	0.00201303301333884	0.0156132490119079	393458	14.839825	393458	solute carrier family 25, member 39	slc25a39	NA
ENSDARG00000007682	11713.935227504	1.01789512258594	0.214998331357432	4.73443266354333	2.19668683273004e-06	7.35161905484101e-05	338304	14.829012	338304	pancreatic progenitor cell differentiation and proliferation factor a	ppdpfa	NA
ENSDARG00000007691	184.851805458791	0.455778819134068	0.155984818966408	2.92194344394643	0.00347854699275755	0.0230539369897471	406816	14.838266	406816	cullin 1b	cul1b	NA
ENSDARG00000007697	252.034251392146	1.29800742133541	0.393186337716641	3.30125260423176	0.000962541798374791	0.00912030914423488	58128	14.837396	58128	fatty acid binding protein 7, brain, a	fabp7a	NA
ENSDARG00000007722	55.6103659351485	-0.712049345077868	0.259586054193549	-2.74301848491044	0.00608772584396872	0.0342876794977597	ENSDARG00000007722	14.833017	NA	nudix (nucleoside diphosphate linked moiety X)-type motif 8	nudt8	NA
ENSDARG00000007744	256.134697025733	1.17063093107806	0.173983090386746	6.7284178506996	1.71517785574991e-11	3.71060352185896e-09	325037	14.815266	325037	TSR1, 20S rRNA accumulation, homolog (S. cerevisiae)	tsr1	NA
ENSDARG00000007836	2859.07060009993	0.797257057660279	0.146372836823916	5.44675552486126	5.12968914642582e-08	3.35925318967291e-06	321453	14.593083	321453	cathepsin La	ctsla	NA
ENSDARG00000007916	25.6696622812143	0.960300844552372	0.276158754945977	3.47735071712729	0.00050639495372564	0.00569133696332794	573360	14.531645	573360	X-prolyl aminopeptidase 3, mitochondrial	xpnpep3	NA
ENSDARG00000007918	90.5141624761145	1.5449722902573	0.166413773177685	9.28392080027945	1.63354161918566e-20	2.82719381663347e-17	317640	14.880566	317640	tetratricopeptide repeat domain 27	ttc27	NA
ENSDARG00000007923	177.308755144025	0.456193898289593	0.167116139830645	2.7298015544872	0.00633724604211685	0.0354219336375753	30081	14.833097	30081	protein tyrosine phosphatase, non-receptor type 1	ptpn1	NA
ENSDARG00000007959	185.160417045173	0.380378632855551	0.136906677996661	2.77837895434748	0.00546308636456289	0.0318811615157415	394135	14.833097	394135	3-hydroxyisobutyrate dehydrogenase b	hibadhb	NA
ENSDARG00000007975	48.4347515851193	-0.848453866012811	0.281212697842006	-3.01712501790904	0.00255184544587935	0.0185567872610014	447823	14.880566	447823	ferritin, heavy polypeptide 1b	fth1b	NA
ENSDARG00000008029	13.9330642710203	-4.95842901066774	1.60742107773757	-3.08471070794137	0.00203750228873801	0.0157425639209573	565535	14.82419	565535	meprin A, alpha (PABA peptide hydrolase), tandem duplicate 2	mep1a.2	NA
ENSDARG00000008030	339.459422288628	0.305912370867242	0.110942347205424	2.75739948336234	0.00582631231896906	0.0332753854033861	406493	14.543792	406493	myosin, light chain 9b, regulatory	myl9b	NA
ENSDARG00000008105	25.9359178057852	1.14697924583934	0.253731686108589	4.52044150823348	6.17107943825454e-06	0.000169915062260122	100006618	14.879544	100006618	methyltransferase like 2A	mettl2a	NA
ENSDARG00000008142	262.107286776665	0.388666769029679	0.113253713550156	3.43182361837126	0.000599537346919274	0.00646209515829805	406780	14.546301	406780	syntaxin binding protein 3	stxbp3	NA
ENSDARG00000008165	60.3388109675159	0.743706404930402	0.196765475822312	3.77965901702189	0.000157043273421451	0.00232021860670839	57933	14.879544	57933	caspase a	caspa	NA
ENSDARG00000008184	617.54443358969	0.391432085984073	0.0982389023500735	3.98449164862621	6.7624735211773e-05	0.00121194329451277	567041	14.838869	567041	melanoma inhibitory activity family, member 3	mia3	NA
ENSDARG00000008237	870.964443820691	0.364759329151876	0.112276638396468	3.24875534538048	0.00115911124116172	0.0103865626380727	445405	14.852479	445405	seryl-tRNA synthetase	sars	NA
ENSDARG00000008380	67.4962488576285	0.471756140562853	0.149414441123926	3.1573664300064	0.00159201153009747	0.0130495397071251	406675	14.815266	406675	bromodomain containing 7	brd7	NA
ENSDARG00000008434	115.270523640429	-0.639883379774711	0.199083412992464	-3.21414712635519	0.00130832616755007	0.0113136127907702	114401	14.879544	114401	bcl2-like 1	bcl2l1	NA
ENSDARG00000008490	179.174190360746	0.802937204002232	0.158294562625694	5.07242441359701	3.92779167361646e-07	1.85156405159002e-05	436587	14.837396	436587	LTV1 ribosome biogenesis factor	ltv1	NA
ENSDARG00000008503	57.9672688431726	-1.36513649207848	0.220998121122746	-6.1771407156908	6.52728938151115e-10	8.23730321427162e-08	378997	14.543538	378997	glucocorticoid induced 1a	glcci1a	NA
ENSDARG00000008740	107.638370443183	0.979844368456204	0.221038552510279	4.43291162255795	9.29689814137614e-06	0.000238122454509032	326718	14.842841	326718	ESF1, nucleolar pre-rRNA processing protein, homolog (S. cerevisiae)	esf1	NA
ENSDARG00000008765	260.63373129696	0.907244267616526	0.226816878833692	3.99989750446103	6.33699232929258e-05	0.0011562147902015	393374	14.8207245	393374	transmembrane p24 trafficking protein 5	tmed5	NA
ENSDARG00000008858	28.1152443386422	-1.73635527263037	0.310849716675463	-5.58583514632305	2.32579784632684e-08	1.69741210290661e-06	570455	14.834426	570455	cytochrome P450, family 7, subfamily B, polypeptide 1	cyp7b1	NA
ENSDARG00000008859	33.4036120152656	-0.78362769160618	0.273438777362592	-2.8658250273225	0.00415924062258747	0.0261762078663102	335888	14.852479	335888	myosin regulatory light chain interacting protein a	mylipa	NA
ENSDARG00000008867	132.087220270451	-0.452920707631549	0.154580821844224	-2.92999288157474	0.00338969768850292	0.0226282917328562	321107	14.833489	321107	RAP1B, member of RAS oncogene family	rap1b	NA
ENSDARG00000008884	1237.90374077432	1.19831069859042	0.236325272838522	5.07059902733807	3.96565502939191e-07	1.86216708066213e-05	406259	14.823884	406259	hypoxanthine phosphoribosyltransferase 1	hprt1	NA
ENSDARG00000008904	320.984925106429	-0.417901281640739	0.102336957408601	-4.0835812615787	4.43469115366115e-05	0.000860998130234052	334032	14.8804035	334032	SWI/SNF related, matrix associated, actin dependent regulator of chromatin, subfamily a, member 2	smarca2	NA
ENSDARG00000009031	87.1466359765002	-0.977197245780812	0.22729941978387	-4.29916295743292	1.71444383708857e-05	0.000400202063320386	556959	15.22285	556959	TRAF2 and NCK interacting kinase b	tnikb	NA
ENSDARG00000009123	68.5906031551697	-0.763600592332129	0.281713034548726	-2.7105618082434	0.00671693283771412	0.0370563029730904	558139	14.839874	558139	selectin E	sele	NA
ENSDARG00000009169	98.9533888015128	0.411565672313035	0.142435301961415	2.88949204758611	0.00385864766708637	0.0247472294794872	393169	14.815489	393169	MOB kinase activator 1Ba	mob1ba	NA
ENSDARG00000009170	190.610679328221	0.53200920225823	0.108036993655079	4.92432438426354	8.46523123037261e-07	3.40005809944736e-05	100036549	14.82419	100036549	CTR9 homolog, Paf1/RNA polymerase II complex component	ctr9	NA
ENSDARG00000009313	69.975925204004	-0.646324555256719	0.214457720368163	-3.01376212592003	0.00258030030914835	0.0186822320102741	336746	14.544415	336746	zgc:63831	zgc:63831	NA
ENSDARG00000009336	28.331366768882	-1.17283711182569	0.393222159616113	-2.98263229358865	0.00285781110003905	0.0201059125882538	321033	14.835336	321033	allograft inflammatory factor 1-like	aif1l	NA
ENSDARG00000009350	157.104071241647	0.399228589979366	0.120343052781591	3.31742116185071	0.000908525518069033	0.0087355449614336	336632	14.833097	336632	autophagy related 3	atg3	NA
ENSDARG00000009390	296.560019967577	0.682409938498869	0.120047599501214	5.68449466156935	1.31200020677874e-08	1.07397854764354e-06	100148292	14.824423	100148292	N-acetylneuraminate pyruvate lyase (dihydrodipicolinate synthase)	npl	NA
ENSDARG00000009524	135.810546249864	-0.456322970987189	0.147697579999619	-3.0895764912896	0.0020044208534035	0.0155763685946013	792211	14.546301	792211	ring finger protein 150a	rnf150a	NA
ENSDARG00000009549	456.699613610202	-0.282109687353526	0.0840642812940292	-3.35588055962554	0.000791127278517734	0.0079276319100433	407625	14.8207245	407625	ubiquitin protein ligase E3 component n-recognin 4	ubr4	NA
ENSDARG00000009612	1484.73261848885	-3.76931181416992	1.21443459845682	-3.10375858770789	0.00191079174372837	0.0150027491738621	406819	14.852479	406819	chitinase, acidic.3	chia.3	NA
ENSDARG00000009626	100.706538630513	-1.24323718566955	0.143865905783996	-8.64163874612639	5.5412402183178e-18	5.16400963422462e-15	562626	14.542969	562626	nuclear receptor binding protein 2b	nrbp2b	NA
ENSDARG00000009677	79.6461090829925	-0.482421609759334	0.158119017707207	-3.05100307828021	0.00228078236360572	0.0170997777974392	114446	14.825805	114446	discs, large homolog 1 (Drosophila)	dlg1	NA
ENSDARG00000009689	367.449856576916	0.733693624526807	0.156606616755621	4.68494652222588	2.80033038753773e-06	8.96791988331234e-05	560060	14.82921	560060	dishevelled associated activator of morphogenesis 1b	daam1b	NA
ENSDARG00000009796	13.4119233803984	-1.32459892929685	0.340824923188425	-3.88644972587449	0.00010172098106026	0.00166308999398792	393928	14.82419	393928	kinesin light chain 1a	klc1a	NA
ENSDARG00000009837	104.534096701861	0.578956593279366	0.176958543357716	3.27170749879548	0.001069001112771	0.00981876306385192	334270	14.833816	334270	acylglycerol kinase	agk	NA
ENSDARG00000009953	85.558680540159	0.521066360564484	0.155949556904378	3.34124938158035	0.000834022741919136	0.00820144928437528	336923	14.852479	336923	mediator complex subunit 14	med14	NA
ENSDARG00000010002	42.0155216817056	-0.645923767972697	0.188776248602423	-3.42163684655617	0.000622453919178973	0.00666757668510457	563953	14.8804035	563953	guanine nucleotide binding protein (G protein), alpha 11a (Gq class)	gna11a	NA
ENSDARG00000010021	252.757593565504	0.576049051243461	0.185787047212978	3.10058779600014	0.00193136947715292	0.0151153367026535	559037	14.593083	559037	GrpE-like 1, mitochondrial	grpel1	NA
ENSDARG00000010078	77.6542546273443	0.439502604544481	0.152328190197081	2.88523486017825	0.00391121759894893	0.024965437940604	406852	14.824423	406852	nucleoporin 133	nup133	NA
ENSDARG00000010186	46.379317989993	2.17218153098551	0.370827114569762	5.85766640474956	4.69416376448698e-09	4.57212096078484e-07	402814	14.823884	402814	myosin IIIA	myo3a	NA
ENSDARG00000010238	123.70287502931	0.571684172711674	0.117914857680586	4.84827937680493	1.24536931284782e-06	4.65668185961462e-05	406495	14.546301	406495	RNA binding motif protein 22	rbm22	NA
ENSDARG00000010246	443.668891783662	1.21336161446918	0.168776395113124	7.18916655173199	6.518801571694e-13	1.92622636685544e-10	321974	15.207947	321974	protein arginine methyltransferase 1	prmt1	NA
ENSDARG00000010301	153.185383710158	-0.902069285469566	0.236606753462409	-3.8125255186889	0.000137554022102591	0.00210147159870478	393912	14.823884	393912	UDP-Gal:betaGlcNAc beta 1,4- galactosyltransferase, polypeptide 6	b4galt6	NA
ENSDARG00000010316	173.879630725099	1.33196680197375	0.233581818489021	5.70235650441413	1.1816237239931e-08	9.94123015012246e-07	394188	14.37014	394188	glutaminyl-tRNA synthetase	qars	NA
ENSDARG00000010381	275.73810429222	0.32438757950075	0.105618208553834	3.07132249204366	0.00213112837359475	0.0162483450258656	327035	15.22285	327035	ring finger protein 2	rnf2	NA
ENSDARG00000010408	18.9935359563978	-1.35889264503343	0.323583823250539	-4.1995073529411	2.67496344121722e-05	0.000564585053838792	553348	14.8207245	553348	immunoglobulin superfamily, member 9b	igsf9b	NA
ENSDARG00000010445	129.492592049887	0.528179359831022	0.165065907720172	3.19980889528331	0.00137518737550536	0.0117658157162765	322581	15.207947	322581	TraB domain containing	trabd	NA
ENSDARG00000010481	455.253624696001	0.550156261567073	0.141632768420603	3.88438542649458	0.000102589055718769	0.00167410502752906	325226	14.595437	325226	basic leucine zipper and W2 domains 1a	bzw1a	NA
ENSDARG00000010563	75.5100956534329	0.396981548424881	0.133519974753984	2.97319969657226	0.00294712639200409	0.020555230995469	541318	15.209884	541318	speckle-type POZ protein-like a	spopla	NA
ENSDARG00000010596	130.06421663331	0.441141895721135	0.144429813572872	3.05436865705401	0.0022553474623593	0.0169411148220832	492472	14.852479	492472	solute carrier family 7, member 6 opposite strand	slc7a6os	NA
ENSDARG00000010655	99.3457853339533	-0.968490283180501	0.224816396632903	-4.30791658297915	1.64799510291304e-05	0.00038692753239906	503713	14.854625	503713	protein phosphatase, Mg2+/Mn2+ dependent, 1K	ppm1k	NA
ENSDARG00000010681	78.6629219765142	-0.641350463332769	0.184592047247587	-3.47442088050817	0.00051195731944443	0.00572702024475464	ENSDARG00000010681	14.823884	NA	tight junction associated protein 1 (peripheral)	tjap1	NA
ENSDARG00000010729	40.4709652153178	-1.89505683270516	0.554660441380494	-3.41660715516065	0.000634067047335895	0.00675019532379118	ENSDARG00000010729	14.833017	NA	NA	CABZ01073795.1	NA
ENSDARG00000010756	15.6479246203942	-0.854913147146567	0.287439192630925	-2.97424000993589	0.00293715239530528	0.0205211079983411	777696	14.8207245	777696	nucleotide-binding oligomerization domain containing 2	nod2	NA
ENSDARG00000010767	88.9308488559391	1.19275932836647	0.333027452000506	3.58156458634726	0.000341542677831267	0.00420507067268882	30687	14.832098	30687	eph receptor A4, like	epha4l	NA
ENSDARG00000010773	828.166362483212	-0.349839669732374	0.121563523845961	-2.87783422744205	0.0040041549322457	0.0254513835278891	560986	14.829012	560986	patatin-like phospholipase domain containing 6	pnpla6	NA
ENSDARG00000010794	22.3927409447913	-1.05618165893268	0.303801174447724	-3.47655554937434	0.000507899002261946	0.00569740408555877	562289	14.842841	562289	transcription factor EB	tfeb	NA
ENSDARG00000010823	53.1597850108337	0.850432166853121	0.229789307661777	3.70092140276979	0.000214818012450187	0.00295886018682974	327360	14.815489	327360	mediator of cell motility 1	memo1	NA
ENSDARG00000010873	549.526675235445	-0.388654884413848	0.140736273313622	-2.76158289020313	0.00575219131895487	0.032980500629029	556764	14.815266	556764	si:dkey-156n14.5	si:dkey-156n14.5	NA
ENSDARG00000010905	39.5793598299526	0.749743850274135	0.248473895624051	3.0173948389674	0.00254957485765743	0.0185514110513632	557908	14.833017	557908	methyltransferase like 13	mettl13	NA
ENSDARG00000010936	392.82519492649	-0.689748286776563	0.160863403190268	-4.2877887269408	1.80460610269582e-05	0.000414853945619731	100136865	14.838266	100136865	ATP-binding cassette, sub-family B (MDR/TAP), member 4	abcb4	NA
ENSDARG00000010945	15.9866770270822	-1.05474704610405	0.293453293673062	-3.59425867367893	0.000325316513353662	0.00407570792066144	ENSDARG00000010945	14.833097	NA	Rap guanine nucleotide exchange factor (GEF) 6	rapgef6	NA
ENSDARG00000010946	1143.20630482344	-0.599360594260726	0.211658162202174	-2.83173862999067	0.0046295674374292	0.0283352923461305	266987	14.593083	266987	cystathionine-beta-synthase b	cbsb	NA
ENSDARG00000010953	194.234089743274	1.00623641816095	0.193294577759727	5.20571466526982	1.93251399607943e-07	1.05461293074335e-05	394244	14.833489	394244	nudE neurodevelopment protein 1-like 1a	ndel1a	NA
ENSDARG00000011065	266.755438868778	-0.364018207683182	0.113029867383791	-3.22054883464707	0.00127945392246703	0.0111354772059541	798222	9.518343	798222	calcium/calmodulin dependent protein kinase II beta	camk2b	NA
ENSDARG00000011065	266.755438868778	-0.364018207683182	0.113029867383791	-3.22054883464707	0.00127945392246703	0.0111354772059541	562064	9.096974	562064	calcium/calmodulin-dependent protein kinase (CaM kinase) II beta 1	camk2b1	NA
ENSDARG00000011079	310.88849480538	0.445395736049014	0.135678132068944	3.28273782412254	0.00102804228159274	0.00956414225541408	321058	14.835336	321058	WD repeat domain 3	wdr3	NA
ENSDARG00000011219	302.506195319598	0.374725486726361	0.115854343101848	3.23445351027486	0.00121875760461239	0.0107618428424775	378972	14.815489	378972	v-akt murine thymoma viral oncogene homolog 2	akt2	NA
ENSDARG00000011298	21.3483060352903	-0.790244924269053	0.252833428843478	-3.12555554019825	0.00177469553987265	0.0141967763408531	566279	14.82419	566279	activating transcription factor 7a	atf7a	NA
ENSDARG00000011312	159.936759473722	0.34775255803315	0.105503551915711	3.29612180555756	0.000980295028195596	0.00924223678333825	324125	14.823151	324125	serine/threonine kinase 3 (STE20 homolog, yeast)	stk3	NA
ENSDARG00000011333	14.41250544783	-1.10775406383303	0.292114510513625	-3.79219115779379	0.000149323898452099	0.00224170883487878	569720	14.829012	569720	Rho GTPase activating protein 33	arhgap33	NA
ENSDARG00000011407	48.7423692377583	-0.547110620221399	0.168268348126694	-3.25141731236027	0.00114831172327612	0.0103314549422792	503730	14.593284	503730	collagen, type II, alpha 1b	col2a1b	NA
ENSDARG00000011422	64.763956565475	-1.20896678156298	0.402280614960602	-3.00528222490012	0.00265334525750445	0.0190546993447934	798565	15.209884	798565	ryanodine receptor 1a (skeletal)	ryr1a	NA
ENSDARG00000011459	60.8706163733329	-0.628992244493615	0.184300555922713	-3.41286135217837	0.000642846386647541	0.00680323386100452	321099	15.2045145	321099	gelsolin a	gsna	NA
ENSDARG00000011463	258.411110961256	-0.394819806064621	0.111794165650516	-3.53166736177343	0.000412948454613714	0.00484304988155386	100004411	14.835131	100004411	coagulation factor IX-like	LOC100004411	NA
ENSDARG00000011496	348.635982118867	0.409847644634205	0.139881585490156	2.92996138982889	0.00339004122947867	0.0226282917328562	100003481	14.8207245	100003481	protein phosphatase, Mg2+/Mn2+ dependent, 1Bb	ppm1bb	NA
ENSDARG00000011498	15.3554589069212	-1.18540232546464	0.338724639076545	-3.49960466028208	0.000465948647915496	0.0053254413863172	492735	14.835336	492735	si:ch211-212o1.2	si:ch211-212o1.2	NA
ENSDARG00000011510	143.262621123518	0.586616732692916	0.179982612347278	3.259296690066	0.00111688800145067	0.010097834431026	406455	14.8804035	406455	regulator of chromosome condensation 2	rcc2	NA
ENSDARG00000011545	384.002705338697	-0.632742701987688	0.1128419033359	-5.60733808347935	2.05462073689517e-08	1.51778842850518e-06	394099	14.835131	394099	arrestin, beta 2b	arrb2b	NA
ENSDARG00000011581	81.2876342835134	-0.924275889172782	0.243092274068068	-3.80216069274985	0.000143439638797337	0.00216679703744357	326062	15.2150755	326062	si:dkey-23k10.5	si:dkey-23k10.5	NA
ENSDARG00000011597	127.529166421159	0.520805402739191	0.148565715367055	3.50555578352958	0.000455655005828952	0.00524241253145086	324525	14.852479	324525	ataxin 2-like	atxn2l	NA
ENSDARG00000011648	60.6378394822954	0.807220447106386	0.180418780163201	4.4741486799556	7.67163487640795e-06	0.00020337386548727	192331	14.853864	192331	small nuclear ribonucleoprotein D1 polypeptide	snrpd1	NA
ENSDARG00000011661	172.29247101556	0.363014497674683	0.0966702426297041	3.75518347528321	0.000173214541779593	0.00247463935573086	432375	14.542969	432375	twinfilin actin-binding protein 1b	twf1b	NA
ENSDARG00000011662	363.624199127301	0.328466841029748	0.12311753624233	2.66791272027434	0.00763240825522505	0.0406625444204272	393287	14.827688	393287	conserved helix-loop-helix ubiquitous kinase	chuk	NA
ENSDARG00000011672	65.8247722902058	-0.527104005511358	0.148883930989294	-3.54036867517463	0.000399568435513195	0.00472270399633401	567064	14.82342	567064	sema domain, immunoglobulin domain (Ig), short basic domain, secreted, (semaphorin) 3B	sema3b	NA
ENSDARG00000011740	340.586981344439	0.235049108813091	0.0753998326314052	3.11736910560713	0.00182472956573183	0.014485226553394	402989	14.833097	402989	U2 small nuclear RNA auxiliary factor 2b	u2af2b	NA
ENSDARG00000011770	15.6780608276656	-0.987912710567485	0.338374690331427	-2.91958216378375	0.0035050098440494	0.0232039312899773	556393	14.542969	556393	dehydrogenase/reductase (SDR family) member 12	dhrs12	NA
ENSDARG00000011783	120.307919294144	-0.658618149267739	0.131120475512118	-5.0230000058753	5.08705430989184e-07	2.29106553770779e-05	567168	14.815266	567168	stromal antigen 2a	stag2a	NA
ENSDARG00000011819	152.829280216727	-0.397994241093478	0.145230632518008	-2.74042902790586	0.00613590321219327	0.0344948804713325	794337	15.209884	794337	pecanex homolog (Drosophila)	pcnx	NA
ENSDARG00000011824	85.0776392475991	-0.73153578981223	0.157478381606255	-4.6453092948421	3.39567327506493e-06	0.000105213764008725	553293	14.824423	553293	pre-B-cell leukemia homeobox interacting protein 1b	pbxip1b	NA
ENSDARG00000011845	40.3205478949679	-0.552130305632621	0.184380695743493	-2.99451254051419	0.00274883755763042	0.0195044571270056	570999	14.883119	570999	chimerin 2	chn2	NA
ENSDARG00000011863	49.1705979227574	-0.938947320457416	0.192089256700098	-4.88807826417569	1.01825052461653e-06	3.90383072966115e-05	553690	14.835336	553690	protein tyrosine kinase 7a	ptk7a	NA
ENSDARG00000011921	281.783462382186	0.470773316268294	0.106939539679311	4.40223810276388	1.07139882134741e-05	0.000268664859840897	394113	15.2150755	394113	thioredoxin-like 1	txnl1	NA
ENSDARG00000011926	58.3932422038683	1.39806557516756	0.30054747772088	4.65172952296726	3.29162636008298e-06	0.000102514275970194	431755	14.815266	431755	tubulin polyglutamylase complex subunit 2	tpgs2	NA
ENSDARG00000012002	56.9376464553268	0.476860858696296	0.171665434758119	2.77785017914763	0.00547198423384128	0.0319023527396473	445254	14.854555	445254	solute carrier family 38, member 7	slc38a7	NA
ENSDARG00000012019	21.069270361203	-1.71005937748217	0.388486719768185	-4.40184770924108	1.07332886638873e-05	0.000268664859840897	30676	14.838869	30676	glycine receptor, alpha 1	glra1	NA
ENSDARG00000012035	70.9934795313227	0.459038845141256	0.175754565209993	2.61181747735993	0.00900623229838324	0.0458640203005099	445148	14.879544	445148	zgc:100832	zgc:100832	NA
ENSDARG00000012044	100.470294488427	0.943519407613282	0.214602182971788	4.3965974369297	1.09961010994975e-05	0.000274110627202494	447901	14.833097	447901	polymerase (RNA) III (DNA directed) polypeptide G like a	polr3gla	NA
ENSDARG00000012137	75.1372494322581	-1.62634177300369	0.431905384487766	-3.76550474111942	0.000166212969357377	0.00240294764172389	553543	14.835131	553543	cytochrome P450, family 46, subfamily A, polypeptide 1, tandem duplicate 1	cyp46a1.1	NA
ENSDARG00000012144	297.169443656727	0.433413157795212	0.122473038298945	3.53884547827818	0.000401881023549842	0.00473157298377681	561549	14.824423	561549	ER membrane protein complex subunit 7	emc7	NA
ENSDARG00000012234	105.221272311042	1.02033564034433	0.220566424683895	4.62597896214998	3.72833144342584e-06	0.000114351228954694	30649	14.8804035	30649	proteasome activator subunit 3	psme3	NA
ENSDARG00000012261	100.358708620289	0.674105356796183	0.182104220286717	3.70175581727226	0.000214112629514875	0.00295778164945577	393480	14.542969	393480	elongation factor Tu GTP binding domain containing 2	eftud2	NA
ENSDARG00000012274	129.897660677585	1.08925205026785	0.282064777898764	3.86170885419374	0.000112596699061445	0.00178782307880657	550549	14.823164	550549	eukaryotic translation initiation factor 4E family member 1c	eif4e1c	NA
ENSDARG00000012295	29.4365206762803	0.973606970187226	0.344832720203406	2.82341817682767	0.00475145524490084	0.0288685457833368	394157	14.880566	394157	BC1 (ubiquinol-cytochrome c reductase) synthesis-like	bcs1l	NA
ENSDARG00000012340	91.8190423945348	-0.749753241905236	0.219865021000888	-3.41006149360251	0.000649482336321032	0.00685387158627456	393426	14.82342	393426	protein tyrosine phosphatase, non-receptor type 11, b	ptpn11b	NA
ENSDARG00000012369	159.262527638233	0.821799064306068	0.176992594981739	4.64312681776802	3.43175559938929e-06	0.000106060507873983	378722	14.543775	378722	retinol dehydrogenase 10b	rdh10b	NA
ENSDARG00000012387	1143.58527198546	0.298734074613603	0.0733794865867722	4.07108428403006	4.6794813083501e-05	0.000902737516730279	406702	14.543792	406702	pyruvate dehydrogenase E1 alpha 1 subunit a	pdha1a	NA
ENSDARG00000012395	55.6794773646139	-5.06556350684591	1.13250468430909	-4.47288525780913	7.71711918784797e-06	0.000203688233030018	387293	15.209884	387293	matrix metallopeptidase 13a	mmp13a	NA
ENSDARG00000012399	349.030625249693	0.375863741607508	0.0978016579028665	3.84312239349566	0.000121478847515764	0.00190390198920244	192305	14.835131	192305	adenylosuccinate synthase, like	adssl	NA
ENSDARG00000012407	182.922033985281	0.645478367488745	0.119000574329149	5.42416178348341	5.82271269618427e-08	3.77230825210013e-06	393649	14.829012	393649	mannosyl (alpha-1,3-)-glycoprotein beta-1,2-N-acetylglucosaminyltransferase a	mgat1a	NA
ENSDARG00000012495	128.954162822395	0.626744925910599	0.226204750223136	2.77069745570046	0.00559363736164938	0.0323848557026766	323426	14.8804035	323426	M-phase phosphoprotein 10 (U3 small nucleolar ribonucleoprotein)	mphosph10	NA
ENSDARG00000012499	244.686317114133	-0.896593031274631	0.155784214230275	-5.75535227176044	8.64613037194833e-09	7.7020492247172e-07	406204	14.546301	406204	period circadian clock 1b	per1b	NA
ENSDARG00000012553	194.157509492955	0.475900846577742	0.123786723506476	3.84452252307044	0.000120787391480125	0.00189634838236514	415242	14.825785	415242	RAP1A, member of RAS oncogene family a	rap1aa	NA
ENSDARG00000012600	155.479562403603	-0.995331287343055	0.202073485340846	-4.92559073578696	8.41058707196192e-07	3.39647541256062e-05	570654	14.819327	570654	si:dkey-97a13.6	si:dkey-97a13.6	NA
ENSDARG00000012609	48867.4540669528	0.47199351645574	0.129705775820196	3.63895526988744	0.0002737463376026	0.00354320179493109	327588	14.879544	327588	hemopexin	hpx	NA
ENSDARG00000012625	128.17114764518	-0.815399009091303	0.200457108887536	-4.06769814059711	4.74798315957102e-05	0.000910155316110806	570761	14.543775	570761	protein kinase, AMP-activated, gamma 2 non-catalytic subunit a	prkag2a	NA
ENSDARG00000012672	105.377634636634	0.659198966422914	0.116615243581843	5.65276842182534	1.57883961853871e-08	1.20321943389366e-06	334854	14.834426	334854	general transcription factor IIE, polypeptide 2, beta	gtf2e2	NA
ENSDARG00000012682	1006.08761028191	0.412952038238041	0.140145265882918	2.94659998421234	0.00321288531128754	0.0218184448129196	321383	14.547449	321383	profilin 2 like	pfn2l	NA
ENSDARG00000012729	34.9562866875968	-0.701988112407198	0.254156640483877	-2.76202939679528	0.00574433061409261	0.0329666344811615	563056	14.543538	563056	hematopoietic cell-specific Lyn substrate 1	hcls1	NA
ENSDARG00000012747	228.110681943748	0.424548732704055	0.162303439907188	2.61577162472238	0.00890260801049869	0.0454509465011343	393648	14.854555	393648	retention in endoplasmic reticulum sorting receptor 1	rer1	NA
ENSDARG00000012776	83.4740228561487	-1.29609679876784	0.169068478109851	-7.6661055523651	1.77297302449813e-14	8.26137238145954e-12	559803	14.823884	559803	SWI/SNF related, matrix associated, actin dependent regulator of chromatin, subfamily a, member 1	smarca1	NA
ENSDARG00000012820	1043.18754877864	0.640919147103781	0.189112625920743	3.38908702675616	0.000701257506181813	0.00722621820432731	394196	14.82921	394196	NOP56 ribonucleoprotein homolog	nop56	NA
ENSDARG00000012827	22.4928623868338	0.706379682118	0.251621315812434	2.80731256744781	0.00499567423268939	0.0299320441785519	100004398	14.82921	100004398	methyltransferase like 3	mettl3	NA
ENSDARG00000012829	19.2345335634128	-3.91294251250864	1.22717273905633	-3.18858330858753	0.0014297180608103	0.0120788244816714	493602	14.531645	493602	N-acylsphingosine amidohydrolase 2	asah2	NA
ENSDARG00000012833	26.7102159146221	1.42568876761046	0.253979408303952	5.61340298070249	1.98385853814835e-08	1.48360778948563e-06	692291	15.209884	692291	forkhead box N3	foxn3	NA
ENSDARG00000012874	257.687638263679	0.267113509753336	0.0903727793897412	2.95568545702665	0.00311975073477147	0.0213414907689194	393159	14.82921	393159	synaptosomal-associated protein 23.1	snap23.1	NA
ENSDARG00000012896	31.4981584416535	-0.906584218906542	0.295410790761555	-3.06889337579515	0.00214853258379249	0.0163501710129686	30630	14.852479	30630	anosmin 1a	anos1a	NA
ENSDARG00000012899	33.4107135763999	0.915313758780627	0.284363608142422	3.21881468855958	0.0012872164259862	0.0111949942575899	386632	14.834426	386632	DEAD (Asp-Glu-Ala-Asp) box polypeptide 49	ddx49	NA
ENSDARG00000012903	114.056022369409	-3.29582191761737	0.842895409375404	-3.91011966723086	9.22504075603474e-05	0.00154153612081877	58148	14.880566	58148	solute carrier family 34 (type II sodium/phosphate cotransporter), member 2a	slc34a2a	NA
ENSDARG00000012947	83.1006872096877	0.368534448824261	0.132342790483335	2.78469607205893	0.00535779170459635	0.0314180283161591	449942	14.543538	449942	spindle and kinetochore associated complex subunit 2	ska2	NA
ENSDARG00000013004	69.6380916128888	0.816792796156371	0.210423142551052	3.88166808200864	0.000103742410598395	0.00167802310333719	553789	14.544415	553789	thymine DNA glycosylase, tandem duplicate 1	tdg.1	NA
ENSDARG00000013058	87.7254273379588	0.72166562787376	0.150612557159778	4.79153691752393	1.65508558158505e-06	5.88003603151083e-05	393414	14.839825	393414	activating signal cointegrator 1 complex subunit 2	ascc2	NA
ENSDARG00000013150	110.588217458413	0.562346204803752	0.142418082728072	3.94855901744918	7.86230338618079e-05	0.00137052957587885	336645	15.207947	336645	DEAH (Asp-Glu-Ala-His) box polypeptide 16	dhx16	NA
ENSDARG00000013207	96.8121553638051	-0.466208632217696	0.144348595122982	-3.22974138972738	0.0012390223709939	0.0108931466071053	114425	14.824423	114425	zinc finger E-box binding homeobox 1b	zeb1b	NA
ENSDARG00000013236	136.596698397413	-0.774075854657047	0.246535065918279	-3.1398205029123	0.00169051381072413	0.0137085507476056	494102	14.838869	494102	24-dehydrocholesterol reductase	dhcr24	NA
ENSDARG00000013252	582.211019097153	1.22811230374077	0.170093232068582	7.2202302749212	5.18996137978449e-13	1.57390137506449e-10	561497	14.82419	561497	si:dkey-202l16.5	si:dkey-202l16.5	NA
ENSDARG00000013329	32.051161467671	0.681588374300525	0.20252066460988	3.36552507179197	0.000763981238450407	0.0077194601366361	550347	15.2150755	550347	tetratricopeptide repeat domain 5	ttc5	NA
ENSDARG00000013397	102.579652099153	-0.396003433604071	0.148717605876824	-2.66278784727117	0.00774962564974737	0.0410971126099219	394197	15.22285	394197	BCL2/adenovirus E1B interacting protein 2	bnip2	NA
ENSDARG00000013415	142.100878509599	-0.841381267906438	0.178687436988478	-4.7086761223213	2.49330876477987e-06	8.12000959282475e-05	195815	14.852479	195815	lamin A	lmna	NA
ENSDARG00000013457	136.596183932851	0.704804881156332	0.118100757027904	5.9678269546554	2.40434161370136e-09	2.62419807657586e-07	406795	14.838869	406795	Mtr4 exosome RNA helicase	mtrex	NA
ENSDARG00000013460	34.6286536827968	-0.914319249678837	0.213189569488554	-4.28876164941985	1.79672055340037e-05	0.000413826416434324	564992	14.831809	564992	info WAP, follistatin/kazal, immunoglobulin, kunitz and netrin domain containing 2a	wfikkn2a	NA
ENSDARG00000013478	77.5458033182146	0.861139562474113	0.23450345246969	3.67218287579547	0.000240487484710748	0.00322290473149415	327053	14.82419	327053	ribosomal RNA processing 15 homolog	rrp15	NA
ENSDARG00000013575	13.0223262716524	-1.01835137111861	0.31586658927825	-3.22399204501346	0.00126416911361074	0.0110494650734966	503590	14.842841	503590	regulatory factor X, 2 (influences HLA class II expression)	rfx2	NA
ENSDARG00000013628	982.444716128559	0.37410768539655	0.0914630739304151	4.09025926333036	4.3089125209562e-05	0.000843335625062752	555639	14.833097	555639	CD164 molecule, sialomucin	cd164	NA
ENSDARG00000013704	49.2454650486725	-0.494797591656246	0.183090792436527	-2.70247118968464	0.00688261488701254	0.0377127450728887	259251	14.880566	259251	ceramide synthase 2a	cers2a	NA
ENSDARG00000013719	24.2075741294675	0.801089378209805	0.306873503756192	2.61048728027775	0.00904133342038868	0.0460040967610285	553652	14.842841	553652	G-2 and S-phase expressed 1	gtse1	NA
ENSDARG00000013776	116.271584588087	0.778424565772836	0.217599659132164	3.57732438036607	0.000347129290938236	0.00426086257316791	436628	15.207947	436628	thimet oligopeptidase 1	thop1	NA
ENSDARG00000013830	1371.67744315312	-0.396128981773607	0.130804774402909	-3.02839849372345	0.00245853655538356	0.0180844993129762	334206	14.823151	334206	oxysterol binding protein-like 2b	osbpl2b	NA
ENSDARG00000013871	131.828281813562	-2.10040380188885	0.605243114321093	-3.47034729051795	0.000519785817130351	0.00579853146826354	393654	14.595437	393654	solute carrier family 5 (sodium/glucose cotransporter), member 1	slc5a1	NA
ENSDARG00000013892	78.7032656414124	-0.634910880869846	0.176831711692992	-3.59048088598584	0.000330068435792488	0.00412245268002679	497306	14.823884	497306	sortilin-related receptor, L(DLR class) A repeats containing	sorl1	NA
ENSDARG00000013926	43.5989134457847	-1.48928818751558	0.467347589183462	-3.18668207985758	0.00143914870669245	0.0121406030004012	795588	14.839874	795588	solute carrier family 16, member 9a	slc16a9a	NA
ENSDARG00000013946	359.004697649983	1.65737555799793	0.361743913036021	4.58162666536117	4.61373015672357e-06	0.000135339808350378	334334	14.835131	334334	influenza virus NS1A binding protein b	ivns1abpb	NA
ENSDARG00000013965	162.362291302173	0.600545477681965	0.126249167304087	4.75682723701041	1.96659333713375e-06	6.76854496573165e-05	336088	14.879544	336088	cullin 2	cul2	NA
ENSDARG00000013979	843.2969236768	0.257107896151648	0.0788116569837642	3.26230796295292	0.00110509018420777	0.0100285899488218	324047	15.209884	324047	Nedd4 family interacting protein 1	ndfip1	NA
ENSDARG00000014008	102.897776442697	0.651703275868071	0.150893513201307	4.31896151161008	1.56765115507092e-05	0.000372062084006835	566033	14.82419	566033	CWC22 spliceosome-associated protein homolog (S. cerevisiae)	cwc22	NA
ENSDARG00000014031	3979.96989967684	-0.409699821751396	0.107861356835046	-3.79839299053096	0.000145637281232017	0.00219725487188778	393561	14.833816	393561	ATP-binding cassette, sub-family C (CFTR/MRP), member 2	abcc2	NA
ENSDARG00000014139	297.632464826652	0.408497882599746	0.100999268843035	4.04456277039588	5.24208624985467e-05	0.000983094038962682	ENSDARG00000014139	14.831809	NA	signal recognition particle 72	srp72	NA
ENSDARG00000014181	115.060081221998	-0.459417086621569	0.140704603277265	-3.26511767149697	0.00109418610256813	0.0099677362103153	569047	14.591863	569047	forkhead box P1b	foxp1b	NA
ENSDARG00000014190	35.31178337787	-2.2719400980884	0.798060144978845	-2.8468281649983	0.00441571905487114	0.0273639060612603	79186	14.543538	79186	somatostatin 2	sst2	NA
ENSDARG00000014239	33.2481565804728	-0.718709729024895	0.245481956146316	-2.9277497226579	0.00341424757095561	0.0227272578693007	571083	14.82419	571083	extended synaptotagmin-like protein 1b	esyt1b	NA
ENSDARG00000014244	220.972170286201	0.502381609513274	0.153346618993836	3.27611793992973	0.00105244601178422	0.00971087847126114	321860	14.853864	321860	RNA binding motif protein, X-linked	rbmx	NA
ENSDARG00000014320	37.0650478380336	-1.2148597990177	0.284457241420739	-4.27079934035079	1.94773597666128e-05	0.000437801621089845	ENSDARG00000014320	15.207947	NA	guanylate cyclase 2C	gucy2c	NA
ENSDARG00000014329	1419.48102786612	0.927073096371039	0.107604787251323	8.61553765452607	6.96141380267715e-18	6.02410915853098e-15	266985	14.852479	266985	nucleophosmin 1a	npm1a	NA
ENSDARG00000014378	395.243991842403	-0.581311408464341	0.196980547162744	-2.95111074081881	0.00316633371115695	0.0215748779025121	562826	14.838266	562826	solute carrier family 12 (potassium/chloride transporter), member 4	slc12a4	NA
ENSDARG00000014386	10.9372022153014	-1.31634516211148	0.436797349396986	-3.01362900651466	0.00258143263600485	0.0186822320102741	406477	14.544415	406477	UDP-N-acetyl-alpha-D-galactosamine:polypeptide N-acetylgalactosaminyltransferase 6 (GalNAc-T6)	galnt6	NA
ENSDARG00000014439	109.040791712161	1.33113079133167	0.14743219211665	9.02876618885552	1.73618182075984e-19	2.10338427585054e-16	553380	14.825785	553380	diacylglycerol kinase, zeta a	dgkza	NA
ENSDARG00000014531	63.9468970231998	0.53704859781328	0.165665736756189	3.24176023557397	0.00118793919691203	0.0105743607245864	554140	14.833489	554140	autophagy related 4A, cysteine peptidase	atg4a	NA
ENSDARG00000014554	324.3988675338	-0.702753391440095	0.23394765522512	-3.00389157892547	0.00266550294538151	0.0190967286713761	393807	14.839825	393807	protein phosphatase 1, regulatory subunit 3Cb	ppp1r3cb	NA
ENSDARG00000014556	42.2814917173307	-1.09220282504312	0.315700007023246	-3.45962242871505	0.000540933306955294	0.00597938596146294	335119	14.8207245	335119	serpin peptidase inhibitor, clade B (ovalbumin), member 1, like 3	serpinb1l3	NA
ENSDARG00000014692	298.07396837946	0.6266628213038	0.154246939690984	4.06272450240665	4.85032618580868e-05	0.000925381129780663	407703	14.82921	407703	zinc finger protein 622	znf622	NA
ENSDARG00000014717	614.175499163738	-0.566388946058689	0.127321227500527	-4.4485036562842	8.64705775233321e-06	0.00022432356460282	ENSDARG00000014717	14.832098	NA	dynein, cytoplasmic 1, heavy chain 1	dync1h1	NA
ENSDARG00000014763	1293.09788262161	0.294940656086226	0.100504747855911	2.93459425925896	0.00333984095347221	0.0224043040704961	399477	14.543775	399477	ADP-ribosylation factor 2a	arf2a	NA
ENSDARG00000014898	73.8750986693256	0.779487138810151	0.229966039357751	3.38957500414888	0.000700010562548731	0.00722370354793686	192325	14.531645	192325	nuclear cap binding protein subunit 2	ncbp2	NA
ENSDARG00000014946	13.9749398801708	-1.20446291347206	0.390902662674724	-3.08123486606771	0.00206143974214125	0.0159072245070326	101101687	15.2150755	101101687	angiopoietin 2a	angpt2a	NA
ENSDARG00000015033	30.3794020318693	-2.00728277539445	0.483606232588041	-4.15065530618244	3.31524723346189e-05	0.000678449666104573	559435	14.823884	559435	solute carrier family 23 (ascorbic acid transporter), member 1	slc23a1	NA
ENSDARG00000015088	290.556412846255	0.816745276703408	0.277940608976634	2.93856043458576	0.00329740364456367	0.0222304091006616	386709	14.833489	386709	DnaJ (Hsp40) homolog, subfamily B, member 11	dnajb11	NA
ENSDARG00000015111	141.398964532042	0.653542752969547	0.160619737072322	4.06888197479291	4.72392674899694e-05	0.000908418612128539	406249	15.207947	406249	DEAD (Asp-Glu-Ala-Asp) box polypeptide 39Ab	ddx39ab	NA
ENSDARG00000015126	268.252329345861	0.460028069077621	0.0926227311421691	4.96668650778082	6.81065510295184e-07	2.90531994972752e-05	393676	14.838869	393676	golgi reassembly stacking protein 2	gorasp2	NA
ENSDARG00000015156	58.6721019623651	-0.437822655127481	0.165208784039536	-2.65011729051106	0.00804638313347213	0.0421999704164567	553503	15.209884	553503	fibulin 2	fbln2	NA
ENSDARG00000015164	2536.62559243873	-1.16157529653914	0.180459904698796	-6.43675002753612	1.2205870085823e-10	1.97165488119661e-08	373121	14.839825	373121	MAP kinase interacting serine/threonine kinase 2b	mknk2b	NA
ENSDARG00000015221	65.0887010513962	0.539175587674009	0.173789637024396	3.10246109552735	0.00191918771933455	0.0150491645435198	323926	14.82342	323926	nuclear speckle splicing regulatory protein 1	nsrp1	NA
ENSDARG00000015224	213.397621647635	-0.531453903969933	0.148212005271941	-3.5857682580761	0.000336087318453286	0.00415903765379118	494040	15.207947	494040	CD2-associated protein	cd2ap	NA
ENSDARG00000015292	128.439614333799	0.543513457967563	0.160441231147921	3.38761709866501	0.00070502614357323	0.0072569173571705	334133	14.542969	334133	ubiquitin-conjugating enzyme E2G 1a (UBC7 homolog, yeast)	ube2g1a	NA
ENSDARG00000015310	479.280245885313	0.553966374596744	0.162254742835589	3.41417677483901	0.000639750524202701	0.00679279369037311	406752	14.546301	406752	phosphatidylinositol transfer protein, beta, like	pitpnbl	NA
ENSDARG00000015337	1163.12489565031	-0.430457739443424	0.0839660623611561	-5.12656813168078	2.95071307033806e-07	1.46507741176826e-05	561372	14.879544	561372	catechol-O-methyltransferase a	comta	NA
ENSDARG00000015352	200.072266076729	0.620112708082787	0.153716323074353	4.03413701082894	5.48033357962247e-05	0.00102144986641733	323464	14.853864	323464	large 60S subunit nuclear export GTPase 1	lsg1	NA
ENSDARG00000015427	352.031610359458	0.372387259854837	0.0933917044887319	3.98736977650694	6.6809853827017e-05	0.0012042420489203	192302	14.8804035	192302	histone deacetylase 1	hdac1	NA
ENSDARG00000015471	47.2438822252743	-0.903549342804797	0.206717178350917	-4.37094464046407	1.23710158109578e-05	0.000301559067504534	393283	14.854625	393283	chromodomain helicase DNA binding protein 1-like	chd1l	NA
ENSDARG00000015472	433.046039814839	-0.385412286766461	0.0899122859622405	-4.2865364020254	1.81480475492314e-05	0.000416408325869203	118437	14.595437	118437	glypican 4	gpc4	NA
ENSDARG00000015524	324.867647231143	0.894420431774523	0.187606916296037	4.76752376422605	1.86504002226533e-06	6.45570281992698e-05	140620	15.2045145	140620	phosphoribosyl pyrophosphate synthetase 1A	prps1a	NA
ENSDARG00000015536	62.568354607327	-1.33298614765759	0.310038170501566	-4.29942592391495	1.71241098633669e-05	0.000400202063320386	567154	14.825805	567154	SRY (sex determining region Y)-box 6	sox6	NA
ENSDARG00000015563	32.6719743809245	-0.776150182057896	0.264961439045675	-2.92929486212559	0.00339731976744739	0.0226643882062914	641489	14.8207245	641489	zgc:123305	zgc:123305	NA
ENSDARG00000015611	74.7120996244803	-1.18956726715247	0.429894631467312	-2.76711356709028	0.00565550498799623	0.0326424215957953	393109	14.824423	393109	RAS-like, family 11, member B	rasl11b	NA
ENSDARG00000015676	174.326286323646	0.960562698377264	0.199193122845827	4.82226838283331	1.41934795594222e-06	5.11767871614287e-05	541444	14.833816	541444	NMD3 ribosome export adaptor	nmd3	NA
ENSDARG00000015749	51.7431728169439	-0.947477602651698	0.193578493028569	-4.89453961454213	9.85361275010988e-07	3.81394627691953e-05	777758	14.825805	777758	Hermansky-Pudlak syndrome 3	hps3	NA
ENSDARG00000015824	96.3702487118241	0.366305069175269	0.128632125017825	2.84769507713963	0.00440370956528972	0.0273314248890804	558474	14.593284	558474	LEM domain containing 3	lemd3	NA
ENSDARG00000015835	68.0899995347107	0.54174462508496	0.15200284525744	3.56404266096093	0.000365186563100383	0.00443754785552772	393732	14.833489	393732	eukaryotic translation initiation factor 4E family member 2 related sequence 1	eif4e2rs1	NA
ENSDARG00000015869	31.2225418825322	-1.25692312747018	0.341843583446899	-3.67689548183498	0.000236089715295391	0.00318510790735374	557279	14.595437	557279	solute carrier family 22 (organic cation/carnitine transporter), member 16	slc22a16	NA
ENSDARG00000015889	326.937929250147	0.730058070614307	0.146775139695781	4.97398995584327	6.55887087427039e-07	2.80779931596416e-05	334307	14.823164	334307	zinc finger CCCH-type containing 15	zc3h15	NA
ENSDARG00000015907	83.6534914018144	0.602529820372676	0.189422504984724	3.18087769149324	0.00146829605139195	0.0123444876215222	664747	14.815489	664747	discoidin, CUB and LCCL domain containing 1	dcbld1	NA
ENSDARG00000015921	63.3275970187807	0.559109612439503	0.179832521742919	3.10905728852972	0.00187685322657132	0.0147938040597993	393262	14.531645	393262	PWP1 homolog (S. cerevisiae)	pwp1	NA
ENSDARG00000015922	46.1786682707158	-1.06635552140441	0.31956023098496	-3.33694689767137	0.000847041302431016	0.00828909965989641	777621	14.546301	777621	serine/threonine kinase 17a like	stk17al	NA
ENSDARG00000015930	230.166493965447	0.575416428440726	0.112757633304478	5.10312616164032	3.34088117375084e-07	1.6320473959674e-05	436808	14.82921	436808	RWD domain containing 1	rwdd1	NA
ENSDARG00000016048	764.062067452949	0.439414142253809	0.151528631781894	2.89987533766087	0.00373311098229586	0.0241337457580119	436958	14.824423	436958	glycerol-3-phosphate acyltransferase 3	gpat3	NA
ENSDARG00000016058	95.6718005930507	0.588478348739435	0.150922536738097	3.89920790796573	9.65078814257662e-05	0.0015907387530247	393381	14.833097	393381	fibroblast growth factor (acidic) intracellular binding protein a	fibpa	NA
ENSDARG00000016085	906.585082920722	-0.680585595405798	0.134377322273197	-5.06473550665138	4.08967766736823e-07	1.9056324976987e-05	567027	14.833489	567027	muscleblind-like splicing regulator 3	mbnl3	NA
ENSDARG00000016089	17.8111147566621	-0.769122680599907	0.269458642601038	-2.85432552162995	0.00431283147289928	0.0268499246116006	559084	14.831221	559084	BRD4 interacting chromatin remodeling complex associated protein like	bicral	NA
ENSDARG00000016093	18.6416883103063	0.893231608154136	0.32842274606106	2.71976170611541	0.00653289762785739	0.0362224506917585	402798	14.854625	402798	queuine tRNA-ribosyltransferase accessory subunit 2	qtrt2	NA
ENSDARG00000016143	308.300172843437	0.513281422835889	0.171326119094627	2.99593211792998	0.00273607334422324	0.0194413657274279	373108	14.824423	373108	X-linked inhibitor of apoptosis	xiap	NA
ENSDARG00000016154	138.35116214694	-0.429531155383696	0.163637801642032	-2.62488954919672	0.00866770792568681	0.0445899284584695	561280	15.2150755	561280	zinc finger protein 36, C3H type-like 1a	zfp36l1a	NA
ENSDARG00000016200	145.452454678591	-0.917900523553225	0.294896760183676	-3.11261650681246	0.00185436804845373	0.0146356149231381	405805	15.207947	405805	tribbles pseudokinase 3	trib3	NA
ENSDARG00000016256	134.80439228055	-0.749401927074179	0.171832555426171	-4.36123367434971	1.29331152019759e-05	0.000312120897752864	394120	14.833017	394120	nudix (nucleoside diphosphate linked moiety X)-type motif 3a	nudt3a	NA
ENSDARG00000016290	56.6640368976537	-3.97047593852919	1.18488441371619	-3.3509394609019	0.000805379071473835	0.00799294008733917	334289	14.839874	334289	chloride channel accessory 1	clca1	NA
ENSDARG00000016345	149.459221977251	0.331544543029636	0.123031810907061	2.69478714964285	0.00704336083258877	0.0383334755106977	447849	14.815266	447849	nuclear receptor coactivator 5	ncoa5	NA
ENSDARG00000016357	378.197413495056	-0.640262433913679	0.131137414043549	-4.88237806566061	1.04814052685327e-06	4.00574841729568e-05	794311	14.852479	794311	flavin containing monooxygenase 5	fmo5	NA
ENSDARG00000016360	198.307988684218	0.740731698137537	0.227050638099009	3.26240747147572	0.00110470229556721	0.0100285899488218	572542	14.819327	572542	karyopherin alpha 1 (importin alpha 5)	kpna1	NA
ENSDARG00000016375	109.923356102499	0.646073375120597	0.185090719243779	3.49057682503068	0.000481979016723227	0.00548279416676235	394138	14.833816	394138	asparagine synthetase	asns	NA
ENSDARG00000016393	370.337402387224	0.440851809613059	0.13455253702434	3.27642881630177	0.0010512880974743	0.00970758788178443	327026	14.838869	327026	ADP-ribosylation factor 2b	arf2b	NA
ENSDARG00000016399	96.705805894079	0.64777777954764	0.196557270731137	3.29561850924207	0.000982052731115242	0.00924442023112755	406268	14.835131	406268	RIO kinase 1 (yeast)	riok1	NA
ENSDARG00000016447	206.908731999781	0.388109282930872	0.128154459026883	3.02844930935613	0.00245812312369382	0.0180844993129762	327606	14.823151	327606	YTH N(6)-methyladenosine RNA binding protein 1	ythdf1	NA
ENSDARG00000016457	135.081729998386	-0.50609855109117	0.14807217355297	-3.41791802569929	0.000631021092781211	0.00672959554493342	403013	14.825805	403013	interferon regulatory factor 9	irf9	NA
ENSDARG00000016483	20.5091654698744	-1.29609500709013	0.385604741108951	-3.36120091097097	0.00077604353676364	0.00782828263771148	394210	14.823884	394210	BAI1-associated protein 2-like 2a	baiap2l2a	NA
ENSDARG00000016484	200.119324292047	1.57207500020119	0.346841126541544	4.53255072683225	5.82756753839398e-06	0.000161928854879915	613144	14.542969	613144	dyskeratosis congenita 1, dyskerin	dkc1	NA
ENSDARG00000016490	29.4992797666074	-1.29103634127081	0.280634717318456	-4.60041563498284	4.2164876729082e-06	0.000126060342998608	ENSDARG00000016490	14.831473	NA	RAB11 family interacting protein 3 (class II)	rab11fip3	NA
ENSDARG00000016494	178.786906675264	0.893770466562487	0.219371216175616	4.07423764222097	4.61653230756779e-05	0.00089343911990709	406651	14.833017	406651	dopa decarboxylase	ddc	NA
ENSDARG00000016496	72.0224460437043	0.982907669105325	0.260204088453159	3.77744898225249	0.000158442947925549	0.00232671068377943	373868	14.839874	373868	cyclin-dependent kinase 8	cdk8	NA
ENSDARG00000016514	25.3429041928979	0.803362893813212	0.253675156027544	3.166896224264	0.00154075290787799	0.0127763322922258	323239	14.829012	323239	general transcription factor IIH, polypeptide 2	gtf2h2	NA
ENSDARG00000016516	253.914722274586	0.512053806052447	0.123661448275121	4.14077154355521	3.46139575409987e-05	0.000700544607579769	503767	15.209884	503767	RNA binding motif protein 8A	rbm8a	NA
ENSDARG00000016527	49.9640433134502	-0.682054905467212	0.2031115735534	-3.35803072929221	0.000784998857960615	0.00789888801012695	562461	14.879544	562461	helicase with zinc finger 2, transcriptional coactivator	helz2	NA
ENSDARG00000016548	255.756615766139	0.568997550730915	0.148997129587513	3.81884907653015	0.000134075756634104	0.00205871709964787	561194	14.824423	561194	eukaryotic translation initiation factor 5B	eif5b	NA
ENSDARG00000016630	445.676811625896	0.254031868530743	0.0858185570116113	2.96010417066757	0.00307535035654766	0.0211173555369906	558883	14.544415	558883	translocated promoter region b, nuclear basket protein	tprb	NA
ENSDARG00000016699	46.0384727033888	0.475789509294564	0.173281603976682	2.74575891713578	0.0060371108956757	0.0341052344461112	474351	14.879544	474351	transient receptor potential cation channel, subfamily A, member 1a	trpa1a	NA
ENSDARG00000016743	67.27098981561	0.51664444122251	0.163442104545824	3.16102415995054	0.00157215457759491	0.0129393021111157	562704	14.853864	562704	angel homolog 2 (Drosophila)	angel2	NA
ENSDARG00000016753	121.925263761894	0.344982078112468	0.129063884101185	2.672955959097	0.00751861205378291	0.0402187493230663	406860	14.593284	406860	importin 9	ipo9	NA
ENSDARG00000016774	57.6675531290657	-0.709865514377472	0.214563243891911	-3.30842087163389	0.000938236941132955	0.00895724234974449	100334463	14.835131	100334463	pleckstrin homology domain containing, family O member 2	plekho2	NA
ENSDARG00000016811	80.2132845349613	0.515499491850396	0.170523024550436	3.02304919355877	0.0025024156061408	0.0182961768668653	560575	14.593284	560575	integrator complex subunit 3	ints3	NA
ENSDARG00000016866	35.8563591467875	-1.69628890031204	0.467615238921444	-3.62753126742518	0.000286144131750451	0.00368399166435358	767674	14.854555	767674	family with sequence similarity 102, member Ab	fam102ab	NA
ENSDARG00000016903	119.754403461112	0.505222562488041	0.193181684839297	2.61527154040676	0.00891565436634447	0.0454983793800603	406372	14.833017	406372	WD repeat domain 5	wdr5	NA
ENSDARG00000016918	171.343413611782	-3.73477322409412	1.16181147494266	-3.2146120989883	0.00130620902117049	0.0113033730653432	492331	14.837396	492331	angiotensin I converting enzyme 2	ace2	NA
ENSDARG00000016939	41.2777958896786	-0.673063562555898	0.243703560298834	-2.76181259613349	0.00574814615785414	0.0329729122643953	557797	14.833017	557797	integrin, beta 2	itgb2	NA
ENSDARG00000016964	97.9883499007867	0.489971663752302	0.148545262065971	3.29846712670444	0.000972142621914543	0.00918682360725015	550408	14.833816	550408	zgc:165532	zgc:165532	NA
ENSDARG00000017004	58.1793410667658	-0.698261325311305	0.206506718547151	-3.38130076456507	0.000721435294585019	0.0073756865771287	569779	14.832098	569779	myosin X	myo10	NA
ENSDARG00000017034	83.0388606857122	-0.522455633428405	0.184302629308736	-2.83477037407432	0.00458586345888783	0.0281590145993037	550580	14.854555	550580	sulfide quinone oxidoreductase	sqor	NA
ENSDARG00000017038	22.5959215106428	-0.821329364013548	0.318912196787571	-2.57540906960244	0.0100121595292557	0.049509107223238	557059	14.544127	557059	zgc:152670	zgc:152670	NA
ENSDARG00000017049	260.403479058491	0.676914938330503	0.199253649082338	3.39725240389841	0.00068066153072751	0.00707829566074145	334431	14.829012	334431	adenylosuccinate lyase	adsl	NA
ENSDARG00000017058	48.0330094499723	-0.947179504873559	0.276414975214418	-3.42665770600461	0.000611058812432999	0.00656874668378507	446214	14.838869	446214	LARGE xylosyl- and glucuronyltransferase 2	large2	NA
ENSDARG00000017084	127.073382994505	0.429711397202351	0.117698544903104	3.65094910524267	0.000261273015452372	0.00341289180369254	445383	15.209884	445383	BUD31 homolog (S. cerevisiae)	bud31	NA
ENSDARG00000017086	62.841643170065	0.545592030033304	0.146646609119961	3.72045445378826	0.000198864605363905	0.00277882894346448	322927	14.8207245	322927	ankyrin repeat and SOCS box-containing 12a	asb12a	NA
ENSDARG00000017093	147.26883367995	0.393973084952036	0.134241728999227	2.93480341685933	0.00333759064329622	0.022402543708267	406679	14.835336	406679	ER membrane protein complex subunit 8	emc8	NA
ENSDARG00000017126	489.472694783151	-0.309798056083449	0.0945264422354643	-3.27736926046308	0.00104779241849642	0.00969008026723977	393639	14.833489	393639	ilvB (bacterial acetolactate synthase)-like	ilvbl	NA
ENSDARG00000017180	2049.24589050792	-0.292165798736079	0.112693039674854	-2.59258069157639	0.00952588320199156	0.0475678436686237	553330	14.546301	553330	Niemann-Pick disease, type C1	npc1	NA
ENSDARG00000017199	47.1795264596706	1.0156953999083	0.27808480593732	3.65246636357844	0.000259733626735636	0.00339813486814495	560338	14.593083	560338	elongator acetyltransferase complex subunit 2	elp2	NA
ENSDARG00000017211	149.95686711353	-0.614878095007349	0.184241413493508	-3.33735007427641	0.000845813404879495	0.00828377477778098	570222	14.829012	570222	plexin b1b	plxnb1b	NA
ENSDARG00000017261	220.728422989595	0.396001362117184	0.123775749211745	3.19934530503013	0.00137740084901881	0.0117762718488438	445504	14.833816	445504	glycerophosphodiester phosphodiesterase domain containing 1	gdpd1	NA
ENSDARG00000017294	228.914055631436	-0.786630818629748	0.241147076038927	-3.26203755629517	0.00110614487758355	0.010030647598746	327650	14.827688	327650	guanine nucleotide binding protein (G protein), alpha inhibiting activity polypeptide 2b	gnai2b	NA
ENSDARG00000017397	211.24162450451	0.360804874629185	0.130994050784339	2.7543607703467	0.0058806904952746	0.0334638634806256	403020	14.852479	403020	SWI/SNF related, matrix associated, actin dependent regulator of chromatin, subfamily c, member 1a	smarcc1a	NA
ENSDARG00000017441	12.7798283957434	-1.5425643897602	0.555139131313017	-2.77869871308067	0.00545771202118984	0.0318651475357662	58143	14.544415	58143	myosin, light polypeptide 3, skeletal muscle	mylz3	NA
ENSDARG00000017454	150.876674733385	0.723664079667336	0.178235250232172	4.06016250278595	4.90385739018399e-05	0.000932656707724946	322969	14.839874	322969	nucleoporin 50	nup50	NA
ENSDARG00000017500	205.980799723398	-0.619324407245897	0.17655161052667	-3.50789440775076	0.000451668285702752	0.00521139169646557	317747	14.82419	317747	rho-associated, coiled-coil containing protein kinase 2a	rock2a	NA
ENSDARG00000017522	20.239171388497	-1.01252968022604	0.290148338140221	-3.4896966383337	0.000483569146837867	0.00549057189685169	442930	14.825805	442930	CTD (carboxy-terminal domain, RNA polymerase II, polypeptide A) phosphatase, subunit 1	ctdp1	NA
ENSDARG00000017624	490.603889983244	-1.14098936419118	0.403695306619733	-2.826362718321	0.00470799196059831	0.0286908061381532	794486	14.842841	794486	keratin 4	krt4	NA
ENSDARG00000017673	14.790844814926	-0.858690530607142	0.297850371341756	-2.88295940924603	0.00393958202081424	0.0251332470680171	553201	14.829012	553201	neuro-oncological ventral antigen 2	nova2	NA
ENSDARG00000017696	118.378737236636	1.04182297137627	0.202426082527348	5.14668346276731	2.65132153393697e-07	1.36535566018109e-05	286787	14.829012	286787	digestive organ expansion factor homolog	diexf	NA
ENSDARG00000017740	443.807208237512	0.292736580701693	0.108774709325435	2.69121914935093	0.00711914122301937	0.0385726278698031	436861	15.207947	436861	SEC63 homolog, protein translocation regulator	sec63	NA
ENSDARG00000017741	231.516027198766	1.1120169947348	0.333596781492689	3.33341643693038	0.000857864364030547	0.00836015049146127	335512	14.880566	335512	GTPase activating protein (SH3 domain) binding protein 1	g3bp1	NA
ENSDARG00000017757	104.974387195923	-0.619621839447678	0.231229422366089	-2.67968424220113	0.00736916369449792	0.0396436137472657	406598	14.823884	406598	phosphatidylinositol-4,5-bisphosphate 3-kinase, catalytic subunit gamma	pik3cg	NA
ENSDARG00000017775	805.384907777431	0.327134819365743	0.0825147979337744	3.96455941912744	7.35316297812636e-05	0.00130429823543193	394151	14.595437	394151	ATP synthase membrane subunit c locus 3a	atp5mc3a	NA
ENSDARG00000017798	34.171305660791	-0.700193066099067	0.232785636399117	-3.00788775858391	0.00263070279381963	0.0189482546653537	402921	14.82342	402921	BCL6 corepressor	bcor	NA
ENSDARG00000017811	214.36448819564	-0.361848900247478	0.0982124398468862	-3.68434895631961	0.0002292879423394	0.00312394970824256	564023	14.832098	564023	si:ch211-210c8.6	si:ch211-210c8.6	NA
ENSDARG00000017835	100.180992830158	1.31034835837083	0.255392639330282	5.13072092369995	2.88634575244037e-07	1.43901558809939e-05	334402	14.829012	334402	BRF1, RNA polymerase III transcription initiation factor a	brf1a	NA
ENSDARG00000017844	202.129576232399	0.445537843985937	0.145343882328563	3.06540486498605	0.00217375520525716	0.0164645744413276	ENSDARG00000017844	14.880566	NA	coatomer protein complex, subunit zeta 1	copz1	NA
ENSDARG00000017985	51.9004372135597	-1.95637336422207	0.635815439163519	-3.07695164935894	0.00209129219648738	0.0160761452794699	393870	15.22285	393870	zgc:77739	zgc:77739	NA
ENSDARG00000018049	332.081880034807	0.420985774052623	0.0988995229232982	4.25670176770336	2.07464806202246e-05	0.000459494721597845	570994	14.82921	570994	splicing factor 3b, subunit 2	sf3b2	NA
ENSDARG00000018061	186.174756561182	-0.494486132851452	0.146811598958008	-3.36816802188012	0.000756694654440523	0.00767785237734249	393253	14.82419	393253	nei-like DNA glycosylase 1	neil1	NA
ENSDARG00000018073	115.253549148296	0.508573585289042	0.155031838814254	3.28044606307206	0.00103643079871775	0.00962101661328163	556778	14.8804035	556778	mitochondrial ribosomal protein S22	mrps22	NA
ENSDARG00000018145	91.7195117005607	-0.608096675812231	0.173185152817556	-3.51125177833713	0.000446001762726771	0.00515625294781133	322977	14.595437	322977	MID1 interacting protein 1, like	mid1ip1l	NA
ENSDARG00000018174	235.722514975852	-0.492380791043704	0.102971357012086	-4.78172576657323	1.73796666706747e-06	6.10303367290506e-05	336421	14.825805	336421	guanine nucleotide binding protein (G protein), alpha inhibiting activity polypeptide 2a	gnai2a	NA
ENSDARG00000018178	1081.34967881043	0.673911370957314	0.225382244210926	2.99008190870009	0.00278902647568968	0.0197596817268891	405822	14.842841	405822	phosphoglucomutase 2	pgm2	NA
ENSDARG00000018241	202.601223699191	0.340216061919031	0.110320101454893	3.08389910299474	0.0020430687203747	0.0157755115024471	393992	14.8804035	393992	microfibril associated protein 1	mfap1	NA
ENSDARG00000018272	167.976402462754	0.351077045007234	0.109339186454164	3.2108986392944	0.00132320598492703	0.0114341230437881	449009	14.82921	449009	WD repeat domain 33	wdr33	NA
ENSDARG00000018361	1048.15207314654	0.858508990486407	0.216690895723901	3.96190614108812	7.43537711454928e-05	0.0013150305655878	368270	14.833017	368270	sulfotransferase family 1, cytosolic sulfotransferase 3	sult1st3	NA
ENSDARG00000018426	2131.65152566969	0.3059363114669	0.105967577693493	2.88707468950369	0.00388841913695255	0.0248460959093777	334197	15.2150755	334197	aldehyde dehydrogenase 7 family, member A1	aldh7a1	NA
ENSDARG00000018460	231.365576867484	-0.565858974055822	0.156002613884325	-3.62724033890484	0.000286466623543866	0.00368422839090652	560384	14.824423	560384	muscleblind-like splicing regulator 2	mbnl2	NA
ENSDARG00000018524	59.0253242585784	-0.787025893078969	0.305409157855405	-2.57695577501833	0.00996747024789306	0.0493082491029908	323713	14.593284	323713	midnolin	midn	NA
ENSDARG00000018529	972.708093580945	0.488478984678751	0.18743444633978	2.60613240638404	0.00915710557161229	0.0464565887772542	406713	14.835131	406713	lipase, gastric	lipf	NA
ENSDARG00000018569	142.80797819631	-0.708572474930597	0.147897995601547	-4.79095387363847	1.65990286650987e-06	5.88003603151083e-05	406471	14.593284	406471	tumor necrosis factor receptor superfamily, member 1a	tnfrsf1a	NA
ENSDARG00000018618	172.313687290308	0.390302062065681	0.113463729939511	3.43988393712912	0.000581963695732891	0.00628946491864761	327069	14.82342	327069	cleavage and polyadenylation specific factor 6	cpsf6	NA
ENSDARG00000018621	60.0199009988973	-4.08371998763312	1.35749366871783	-3.00827921465758	0.00262731628726031	0.0189463909643802	553256	14.542969	553256	solute carrier family 6 (neutral amino acid transporter), member 19a, tandem duplicate 1	slc6a19a.1	NA
ENSDARG00000018693	1041.05672054173	-0.579550159547688	0.136503102669926	-4.24569220927588	2.17919605831831e-05	0.000475692977414888	30291	15.2150755	30291	cadherin 2, type 1, N-cadherin (neuronal)	cdh2	NA
ENSDARG00000018698	79.0134875119239	0.704228505649489	0.239897331754564	2.93554121881595	0.0033296637119782	0.0223731979315673	445251	14.593284	445251	coactivator-associated arginine methyltransferase 1	carm1	NA
ENSDARG00000018721	12.1880564951549	-1.2894336411234	0.334069327663134	-3.8597785978832	0.000113489803121297	0.00179729276446341	563273	14.542969	563273	nephronectin	npnt	NA
ENSDARG00000018742	171.823737885028	0.37578467759577	0.129872248897713	2.89349480574358	0.00380980592172589	0.0245240399063854	553346	14.835131	553346	proteasome activator subunit 4b	psme4b	NA
ENSDARG00000018782	32.3035719332518	-0.851241799173578	0.246166558677383	-3.45799122247626	0.000544219114922937	0.00600474915964606	100003413	14.8804035	100003413	lysine (K)-specific demethylase 4A, genome duplicate a	kdm4aa	NA
ENSDARG00000018809	1089.33431417559	-0.862993179253021	0.184774038937223	-4.67053263660174	3.00419746368572e-06	9.5277100189928e-05	447830	14.854555	447830	abhydrolase domain containing 3	abhd3	NA
ENSDARG00000018846	592.029314055437	-1.17754801225125	0.173098797463151	-6.80275096943941	1.02639989958319e-11	2.53772138437761e-09	ENSDARG00000018846	14.854555	NA	diacylglycerol O-acyltransferase 2	dgat2	NA
ENSDARG00000018890	91.3028821606796	0.388893985867506	0.148070264041869	2.62641515758722	0.00862895010217175	0.0444727437144107	324121	14.531645	324121	small nuclear ribonucleoprotein polypeptide A	snrpa	NA
ENSDARG00000018902	326.73374512292	0.926485619904432	0.172720117456774	5.36408632385456	8.1359989786929e-08	4.8795855260824e-06	30228	14.531645	30228	pescadillo	pes	NA
ENSDARG00000018923	445.504845760881	1.00922105703313	0.325210784366378	3.10328287236673	0.00191386613807197	0.0150171556105842	568468	14.824423	568468	FAT atypical cadherin 2	fat2	NA
ENSDARG00000018966	42.6057793883588	-0.684759378481881	0.18495994520741	-3.70220361881059	0.000213734972182803	0.00295593514611263	336553	14.8207245	336553	cytochrome b5 reductase 1	cyb5r1	NA
ENSDARG00000018971	91.1085362366072	0.547678866149644	0.210572395860518	2.60090532717509	0.00929781091113698	0.0468827790770105	336526	14.833017	336526	UDP-GlcNAc:betaGal beta-1,3-N-acetylglucosaminyltransferase 5a	b3gnt5a	NA
ENSDARG00000018973	276.51777182413	0.489307436311034	0.141830397282898	3.44994758306324	0.000560695410524786	0.00614735284932831	795480	14.531645	795480	cleft lip and palate associated transmembrane protein 1	clptm1	NA
ENSDARG00000018989	545.177194717072	0.221083265905991	0.0696354888613365	3.17486485010867	0.00149906303453483	0.0125162981829011	334086	15.22285	334086	heat shock protein 4b	hspa4b	NA
ENSDARG00000019004	770.103078563531	-0.633156970444267	0.207092856547738	-3.05735784902998	0.00223297524195309	0.0168236909553866	323115	14.82921	323115	SWI/SNF related, matrix associated, actin dependent regulator of chromatin, subfamily d, member 1	smarcd1	NA
ENSDARG00000019103	122.073056775032	-0.594707522529963	0.174409618902351	-3.40983213123657	0.000650028762082498	0.00685387158627456	334347	14.827688	334347	lysine (K)-specific demethylase 4A, genome duplicate b	kdm4ab	NA
ENSDARG00000019191	71.186366777598	-0.662830122721956	0.222789414722747	-2.97514190046607	0.00292853046560169	0.0204844957221504	564600	15.209884	564600	septin 12	sept12	NA
ENSDARG00000019223	421.361416559891	-0.29976553345194	0.0894276945873947	-3.35204362401392	0.000802173775768458	0.00798492566355481	406834	14.823884	406834	arginine and glutamate rich 1a	arglu1a	NA
ENSDARG00000019228	19.2015226053787	-4.40927023580247	1.28144967058179	-3.44084542454221	0.00057989971611975	0.00627836019731079	450063	14.852479	450063	monoacylglycerol O-acyltransferase 2	mogat2	NA
ENSDARG00000019231	517.224840950435	-0.364048443110999	0.0812463318552031	-4.48079851481548	7.43642894968341e-06	0.000197570913871523	553383	14.834426	553383	spectrin alpha, non-erythrocytic 1	sptan1	NA
ENSDARG00000019236	124.882010432989	-0.814747914661211	0.206754557174034	-3.94065275173308	8.12601860787029e-05	0.00140437539849285	553575	14.837396	553575	glutathione reductase	gsr	NA
ENSDARG00000019239	216.38718467424	0.362887190343987	0.096474252006872	3.76149265524379	0.000168902381954354	0.00242734561966429	323883	14.82921	323883	cullin 1a	cul1a	NA
ENSDARG00000019280	233.487113130511	0.672116351748471	0.119119683506842	5.64236179917208	1.67733162142074e-08	1.27005453709452e-06	ENSDARG00000019280	14.880566	NA	leucyl-tRNA synthetase b	larsb	NA
ENSDARG00000019293	111.883776246544	0.546485613639622	0.139605679902026	3.91449412390054	9.05939438538688e-05	0.00152861508327245	406813	14.37014	406813	transcription factor Dp-1, a	tfdp1a	NA
ENSDARG00000019335	16.5191612847253	0.809971791138051	0.279020360716899	2.90291285215515	0.00369709501012145	0.023964850747791	373116	14.852479	373116	hes family bHLH transcription factor 6	hes6	NA
ENSDARG00000019383	337.407450249205	-0.5166175949157	0.113269034174167	-4.56097819392835	5.09158689710445e-06	0.00014651918113639	567039	14.833816	567039	CDC42 binding protein kinase beta (DMPK-like)	cdc42bpb	NA
ENSDARG00000019392	27.4030668300054	0.663758719365454	0.247339559713217	2.68359303354087	0.0072835707221034	0.0393353171397267	369197	14.8207245	369197	signal transducer and activator of transcription 5a	stat5a	NA
ENSDARG00000019420	493.284845836475	-0.851750603302262	0.108067321023653	-7.88166667993773	3.23042818250482e-15	1.77893806504754e-12	565971	14.543775	565971	ethanolamine kinase 1	etnk1	NA
ENSDARG00000019498	47.2242262198	-1.2713811966852	0.347032625374699	-3.66357830279635	0.000248716136141914	0.00328592801456847	83776	15.209884	83776	cryptochrome circadian clock 5	cry5	NA
ENSDARG00000019521	271.972520843867	-4.14589305452159	1.24712397933957	-3.32436319339886	0.000886207014357382	0.00856855385390238	337514	14.593284	337514	myeloid-specific peroxidase	mpx	NA
ENSDARG00000019541	6367.02487072263	0.501955081678261	0.137036950607189	3.6629177711134	0.000249358603591225	0.00329082732299313	ENSDARG00000019541	14.853864	NA	glutamic pyruvate transaminase (alanine aminotransferase) 2, like	gpt2l	NA
ENSDARG00000019549	184.73973759481	-0.499220474183062	0.156501703839785	-3.18987245464194	0.00142335596822031	0.012050284804325	100002015	15.207947	100002015	CDP-diacylglycerol synthase (phosphatidate cytidylyltransferase) 1	cds1	NA
ENSDARG00000019564	37.1529688486613	-0.710418623476739	0.228151286513804	-3.11380502968917	0.00184691491121078	0.0146053356066049	560581	14.842841	560581	ArfGAP with SH3 domain, ankyrin repeat and PH domain 2b	asap2b	NA
ENSDARG00000019579	58.0738733289355	-0.970253540114075	0.26836677151607	-3.61540117143741	0.000299882864425432	0.0038087169696254	ENSDARG00000019579	14.82342	NA	LIM domain binding 2a	ldb2a	NA
ENSDARG00000019596	214.49333238146	0.420416161020755	0.132741297388723	3.16718436003829	0.00153922703232248	0.0127724215730047	565850	14.838869	565850	nardilysin a (N-arginine dibasic convertase)	nrd1a	NA
ENSDARG00000019644	754.904774129648	-0.654396637843697	0.239888866901854	-2.72791583158976	0.00637358684824157	0.0355506467156752	30497	14.879544	30497	lactate dehydrogenase Ba	ldhba	NA
ENSDARG00000019709	211.742413736291	-0.590533567165578	0.161367153380848	-3.65956487917861	0.000252643873964326	0.00333055553109663	492802	14.823884	492802	ras homolog family member Ua	rhoua	NA
ENSDARG00000019743	181.666271952514	0.299131853311675	0.115206328100172	2.59648804231987	0.0094182183836881	0.0472079916087635	407638	14.833489	407638	dynactin 1a	dctn1a	NA
ENSDARG00000019838	430.813437111883	-0.688887103019348	0.14547502588692	-4.7354320703461	2.18588911852835e-06	7.33574700026897e-05	116991	15.2045145	116991	UDP-glucose 6-dehydrogenase	ugdh	NA
ENSDARG00000019845	83.7582195916484	-0.571738415844042	0.157941377030873	-3.61994068047339	0.000294670561881527	0.00376575301391847	550568	14.834426	550568	PDZ and LIM domain 1 (elfin)	pdlim1	NA
ENSDARG00000019907	10.6685042166217	1.8368929948638	0.452283859960007	4.06137197782434	4.87851683258406e-05	0.000929296091615659	447872	14.82342	447872	DNA replication and sister chromatid cohesion 1	dscc1	NA
ENSDARG00000019917	85.1581807116095	-0.746580679511195	0.185842662316701	-4.01727283824056	5.88755441638909e-05	0.00108400792940051	407981	14.835336	407981	erythrocyte membrane protein band 4.1-like 3b	epb41l3b	NA
ENSDARG00000019963	23.6966401137	0.966118693164461	0.277095725896091	3.48658821798914	0.000489224000841135	0.00554957750017823	445143	14.815266	445143	sideroflexin 1	sfxn1	NA
ENSDARG00000019969	69.0300145332432	-0.885229571370445	0.207185660824771	-4.27263917708637	1.93172906401514e-05	0.000435808149172132	562140	14.824423	562140	SWI/SNF related, matrix associated, actin dependent regulator of chromatin, subfamily d, member 3b	smarcd3b	NA
ENSDARG00000019973	30.8288813729859	-0.67991626300877	0.261364597287553	-2.60140918113989	0.00928416437602277	0.0468461688527763	406765	14.595437	406765	serine/threonine kinase 38a	stk38a	NA
ENSDARG00000020015	54.1742769469843	0.679834108993629	0.170993071249406	3.97579915973344	7.01433051091475e-05	0.00125152598143936	432383	14.834426	432383	mitochondrial ribosomal protein S33	mrps33	NA
ENSDARG00000020054	20.3563483055461	-1.50556907282024	0.42535694368901	-3.53954271855264	0.000400820893567266	0.00473157298377681	570457	14.825785	570457	aldehyde oxidase 6	aox6	NA
ENSDARG00000020077	172.811056578816	-1.04113598784241	0.292367416269785	-3.56105342081518	0.000369369916739109	0.00447491654129431	393206	14.815489	393206	nucleolar protein 10	nol10	NA
ENSDARG00000020128	63.4087684397118	-0.929801474319161	0.189710151668756	-4.90116878902002	9.52681588021158e-07	3.73519010966872e-05	568800	15.22285	568800	RAB31, member RAS oncogene family	rab31	NA
ENSDARG00000020134	30.7176917347972	-1.27906627497931	0.26803524763496	-4.77200773504714	1.82398497544881e-06	6.33168423425856e-05	562521	15.22285	562521	signal-induced proliferation-associated 1 like 1	sipa1l1	NA
ENSDARG00000020201	145.867325372368	0.563959911636247	0.133371109745723	4.22850130520362	2.35253151954445e-05	0.000507133796428488	393319	14.595437	393319	cell division cycle 73, Paf1/RNA polymerase II complex component, homolog (S. cerevisiae)	cdc73	NA
ENSDARG00000020232	119.528182503365	0.847130124758322	0.184196600010972	4.59905407975966	4.24413607611626e-06	0.000126333436270635	386850	14.854555	386850	eukaryotic translation initiation factor 6	eif6	NA
ENSDARG00000020252	86.7216667442285	0.356977253796626	0.133714197835922	2.66970343893224	0.00759182670701806	0.0404819456670439	557247	14.830651	557247	BTB (POZ) domain containing 10b	btbd10b	NA
ENSDARG00000020311	92.5876506671692	0.863324000919285	0.271761153710826	3.17677485958102	0.00148922596717988	0.012451745881892	406282	14.593083	406282	cornichon family AMPA receptor auxiliary protein 1	cnih1	NA
ENSDARG00000020328	4081.29215967965	0.572052437980249	0.199958875835016	2.86085044032876	0.0042250631545522	0.0264393802259297	568764	14.823164	568764	pleckstrin homology domain containing, family A member 6	plekha6	NA
ENSDARG00000020377	423.470357250429	0.71514200251992	0.245690860766376	2.9107391308297	0.00360574929294489	0.023625555805315	323453	14.815266	323453	eukaryotic translation initiation factor 4, gamma 2a	eif4g2a	NA
ENSDARG00000020387	362.250077489527	0.325551148033935	0.0824882727502965	3.94663552987008	7.92570657954764e-05	0.0013776174348812	393234	14.834426	393234	nipsnap homolog 3A (C. elegans)	nipsnap3a	NA
ENSDARG00000020397	51.1198103459752	0.446748723859307	0.166946380173177	2.67600126097902	0.00745063648061176	0.0399505487756586	393352	14.546301	393352	sorting nexin 15	snx15	NA
ENSDARG00000020405	346.423199493873	0.293347694409742	0.102417346712141	2.86423837198438	0.00418013310920099	0.0262531428812701	327082	14.833097	327082	N-ethylmaleimide-sensitive factor attachment protein, alpha b	napab	NA
ENSDARG00000020449	302.775152683071	0.301351442616926	0.0819409644399677	3.67766531278387	0.000235378525298357	0.00318182268783098	334511	15.22285	334511	Yip1 domain family, member 3	yipf3	NA
ENSDARG00000020454	218.663013521759	0.484355541194564	0.170807177404748	2.8356861143301	0.00457273631609141	0.0281131534352944	415221	14.825785	415221	proteasome 26S subunit, non-ATPase 8	psmd8	NA
ENSDARG00000020482	213.606442731656	0.371873253177709	0.11823119329994	3.14530575898279	0.00165913329080301	0.0134992611269835	321994	14.880566	321994	non-POU domain containing, octamer-binding	nono	NA
ENSDARG00000020494	108.226206824437	0.634562789753458	0.13939396045123	4.55229758663379	5.30632052363329e-06	0.000150906274985487	406682	14.833017	406682	zinc finger protein 330	znf330	NA
ENSDARG00000020541	38.8633550631371	-0.890514510864487	0.233778907707468	-3.80921666371546	0.000139407758095633	0.00211644735504836	497617	15.2045145	497617	isthmin 1	ism1	NA
ENSDARG00000020596	107.131041491909	0.713609811897046	0.205328199502985	3.47545935543389	0.000509979266040905	0.00571016525701069	450070	14.544415	450070	mitoguardin 1	miga1	NA
ENSDARG00000020738	8504.95706989378	0.59283251163769	0.107684883366321	5.50525285541703	3.68638779565088e-08	2.53753341729036e-06	791500	14.543538	791500	zgc:153921	zgc:153921	NA
ENSDARG00000020759	70.5347888474783	-0.690702135264812	0.243339745022781	-2.83842713486919	0.00453364691736261	0.0279091119938252	30396	14.854625	30396	E74-like ETS transcription factor 1	elf1	NA
ENSDARG00000020866	5318.91132077511	0.481882207584137	0.160518576421538	3.00203389742672	0.00268182311397434	0.0191705035637207	570354	14.842841	570354	apolipoprotein A-IV b, tandem duplicate 2	apoa4b.2	NA
ENSDARG00000020913	118.10666763817	1.00672037449672	0.203462368803228	4.94794384051594	7.50015397655296e-07	3.11179333650477e-05	445399	14.593284	445399	DEAD (Asp-Glu-Ala-Asp) box helicase 56	ddx56	NA
ENSDARG00000020926	409.814327848765	0.521829266215707	0.170145732882851	3.0669547650366	0.00216251580052153	0.0164359340798735	406853	14.853864	406853	cAMP responsive element binding protein 3-like 3 like	creb3l3l	NA
ENSDARG00000020984	512.71812182292	-1.28747285776512	0.376890005956699	-3.41604403782741	0.000635379708515329	0.0067582310523821	566499	14.595437	566499	solute carrier family 16 (aromatic amino acid transporter), member 10	slc16a10	NA
ENSDARG00000021004	10064.8186767245	-0.396884732300844	0.118982109295435	-3.33566730873271	0.000850949322848659	0.0083072127689859	565774	14.823164	565774	complement component 5	c5	NA
ENSDARG00000021140	260.919339980342	-0.935574936465769	0.202987238244667	-4.60903327990546	4.04545580648696e-06	0.000121313606672251	393856	14.815489	393856	poly A binding protein, cytoplasmic 1 b	pabpc1b	NA
ENSDARG00000021149	358.789286547953	-0.469124464909179	0.130947187473786	-3.58254708603874	0.000340260260103471	0.00419354328703311	792137	14.3697405	792137	uncharacterized LOC792137	LOC792137	NA
ENSDARG00000021149	358.789286547953	-0.469124464909179	0.130947187473786	-3.58254708603874	0.000340260260103471	0.00419354328703311	337696	14.3697405	337696	carbonyl reductase 1-like	cbr1l	NA
ENSDARG00000021163	207.32803057472	-0.383633075170067	0.11239105496401	-3.41337729495391	0.000641630452209233	0.00680083370823697	30607	14.543775	30607	thyroid hormone receptor beta	thrb	NA
ENSDARG00000021184	66.7179022737173	-0.746943599097434	0.255111665422818	-2.92790844299284	0.00341250517554368	0.0227272578693007	407613	14.854555	407613	RNA binding fox-1 homolog 1, like	rbfox1l	NA
ENSDARG00000021242	100.64715538764	-1.46189054616104	0.386583590286917	-3.78156389172145	0.000155846210868223	0.00230697626187973	373081	14.833097	373081	major vault protein	mvp	NA
ENSDARG00000021343	552.805834231497	-0.286749860571485	0.108947091987052	-2.63201022938331	0.00848813071618611	0.0438523256403389	323226	14.542969	323226	WD repeat and SOCS box containing 1	wsb1	NA
ENSDARG00000021346	795.21227980105	-0.455872529874928	0.107355951542056	-4.24636476438236	2.17266816516785e-05	0.000475124094242032	406428	14.853864	406428	pyruvate dehydrogenase E1 beta subunit	pdhb	NA
ENSDARG00000021378	24.4928204358796	-0.802573606589571	0.266089696875084	-3.01617693587866	0.00255983838403242	0.0185925911406192	565544	14.838869	565544	PHD finger protein 21Ab	phf21ab	NA
ENSDARG00000021399	142.157547456811	0.350038138607354	0.121590391381211	2.87883059369315	0.00399152682418614	0.0254111127036338	445106	14.839874	445106	Yip1 domain family, member 2	yipf2	NA
ENSDARG00000021405	74.9890086735064	-0.842135573016692	0.144135657023607	-5.84265955008458	5.13739422784e-09	4.93964532303822e-07	568230	14.825805	568230	chromodomain helicase DNA binding protein 3	chd3	NA
ENSDARG00000021564	15.5877070274772	-1.42623599481774	0.295154898767528	-4.83216101366855	1.35058952287225e-06	4.92843134626425e-05	393186	14.839825	393186	zgc:56235	zgc:56235	NA
ENSDARG00000021569	129.945278692164	0.598414594192465	0.139405698263765	4.29261215033135	1.76583306864029e-05	0.000409646746593589	447824	14.879544	447824	ganglioside induced differentiation associated protein 2	gdap2	NA
ENSDARG00000021573	375.912664388348	-0.860402240182184	0.20460832936085	-4.20511834913998	2.60945574754347e-05	0.000554623796166477	641419	14.833816	641419	solute carrier family 16, member 7 (monocarboxylic acid transporter 2)	slc16a7	NA
ENSDARG00000021702	422.66715740221	-0.340333226212489	0.131461030628473	-2.58885256402954	0.00962963142391032	0.0479483416281453	406261	14.833489	406261	programmed cell death 4a	pdcd4a	NA
ENSDARG00000021739	19.6923668616653	-1.26153868264557	0.3224635923278	-3.91218950808918	9.14630925957536e-05	0.00153660594767398	768198	14.833816	768198	kelch-like family member 24a	klhl24a	NA
ENSDARG00000021753	107.502772926825	0.385552638784477	0.147261584599233	2.61814810586035	0.00884084240189531	0.0452500235314582	393359	14.825805	393359	coiled-coil domain containing 25	ccdc25	NA
ENSDARG00000021789	45.483687245735	1.01669019939565	0.255155388727324	3.98459230850169	6.75960774647871e-05	0.00121194329451277	548602	14.82342	548602	myocilin	myoc	NA
ENSDARG00000021811	266.469739232171	0.391396029698827	0.126548358198265	3.09285742834862	0.00198239348523879	0.0154448212692399	406660	15.2150755	406660	calmodulin 1a	calm1a	NA
ENSDARG00000021827	36.4737157746066	0.494789560835663	0.183831297188568	2.69154147526971	0.00711226542381022	0.0385726278698031	553631	14.82921	553631	katanin p60 (ATPase containing) subunit A 1	katna1	NA
ENSDARG00000021838	5177.66089834607	-0.359625152225409	0.118490079631718	-3.03506549529859	0.00240483457531278	0.017829142720482	100000341	15.2150755	100000341	ribosomal protein S23	rps23	NA
ENSDARG00000021855	43.7632615478736	-0.551152754145584	0.179341999166042	-3.07319399085824	0.00211780767085787	0.016197752482603	493634	14.544415	493634	aryl hydrocarbon receptor nuclear translocator	arnt	NA
ENSDARG00000021982	20.5093048254345	-0.766564012419082	0.284044693428189	-2.69874435310612	0.00696016203964966	0.0380001636369336	101886051	14.839874	101886051	SH3-domain binding protein 2	sh3bp2	NA
ENSDARG00000021984	166.972789642072	-0.397260351225775	0.111606064633068	-3.55948713478847	0.000371579734659446	0.00447929202527282	554125	15.207947	554125	NADH dehydrogenase (ubiquinone) 1 alpha subcomplex, 2	ndufa2	NA
ENSDARG00000021987	146.596683022025	-0.683739746907979	0.228854005584142	-2.98766781539504	0.00281114915191127	0.0198815364713397	100321011	14.838869	100321011	si:ch211-165e15.1	si:ch211-165e15.1	NA
ENSDARG00000021991	886.087027502948	-0.263545219110619	0.0721883517995976	-3.65079978335353	0.000261424976791306	0.00341289180369254	541490	14.879544	541490	ER lipid raft associated 1	erlin1	NA
ENSDARG00000022085	211.375478265123	-0.687695485368101	0.218153707215471	-3.15234379532621	0.00161965453141026	0.0132313652380548	558083	14.8804035	558083	si:dkey-34e4.1	si:dkey-34e4.1	NA
ENSDARG00000022129	386.274123392766	0.411385852398765	0.114642604802807	3.58842031813892	0.000332687638117069	0.0041323970057576	406277	15.209884	406277	RNA binding motif protein 4.3	rbm4.3	NA
ENSDARG00000022213	103.489388215418	0.966751223701412	0.35572699594977	2.71767741753825	0.00657418987006666	0.036411998047667	327057	14.544415	327057	uridine-cytidine kinase 2b	uck2b	NA
ENSDARG00000022261	51.3206649259923	-3.14420363718632	0.955722781836283	-3.28986992561294	0.0010023370625315	0.00939158044282224	337325	14.853864	337325	PDZ domain containing 1	pdzk1	NA
ENSDARG00000022309	355.679327816018	-0.576074561693464	0.10672944395004	-5.39752237408006	6.75674500346906e-08	4.24134537393926e-06	324023	14.835336	324023	desmoplakin a	dspa	NA
ENSDARG00000022399	76.4162737529074	0.833080030187353	0.280172366719001	2.97345537657142	0.00294467220141455	0.0205499445392496	405834	14.879544	405834	N-terminal Xaa-Pro-Lys N-methyltransferase 1	ntmt1	NA
ENSDARG00000022410	381.56286196764	0.97689602978731	0.149560520996662	6.53177739203725	6.49937097591947e-11	1.15793940254801e-08	563195	14.8207245	563195	ribosomal RNA processing 12 homolog	rrp12	NA
ENSDARG00000022437	40.2948007753555	-0.591742582699411	0.207472512175919	-2.85214931121895	0.00434246980357217	0.0269928279478075	445280	14.837396	445280	CD81 molecule b	cd81b	NA
ENSDARG00000022650	1217.08324448727	-0.31184998478523	0.0852832476753094	-3.65663824122301	0.000255544623434398	0.00336148003573044	569245	14.815489	569245	cytochrome P450, family 2, subfamily AD, polypeptide 3	cyp2ad3	NA
ENSDARG00000022698	35.8992968684312	-1.0520267786453	0.382051221291822	-2.7536275766587	0.0058938794108552	0.0335074373826892	558327	14.823151	558327	ladinin	lad1	NA
ENSDARG00000022712	142.840036540623	-0.966849686728712	0.167144012288547	-5.78453079766689	7.27150008958857e-09	6.67380481707315e-07	30767	14.823164	30767	signal transducer and activator of transcription 3 (acute-phase response factor)	stat3	NA
ENSDARG00000022995	97.7792385662513	-0.449393039823245	0.140982121520013	-3.18758885863022	0.00143464369169228	0.0121119918640084	368255	14.543792	368255	chloride intracellular channel 4	clic4	NA
ENSDARG00000023028	386.333132510476	0.750302833156035	0.146106135130121	5.13532735971573	2.81653327532641e-07	1.41586309670454e-05	334102	14.837396	334102	carnitine deficiency-associated gene expressed in ventricle 3	cdv3	NA
ENSDARG00000023188	30.0302927467806	-0.846920680861774	0.278173181495555	-3.0445806324982	0.00233004961475776	0.0173821127357083	ENSDARG00000023188	14.835131	NA	lymphocyte cytosolic protein 1 (L-plastin)	lcp1	NA
ENSDARG00000023217	105.982536838287	-1.51248385829819	0.246315515088771	-6.14043276061235	8.22969651124386e-10	9.97027732337194e-08	555432	14.544415	555432	cAMP responsive element modulator a	crema	NA
ENSDARG00000023220	143.945166848344	0.481231931541126	0.128879781717684	3.73395985877198	0.000188492549199679	0.00265533399250477	352917	14.82342	352917	selenoprotein T, 2	selenot2	NA
ENSDARG00000023279	178.291329897279	0.396165491586546	0.145130454935613	2.72971990449768	0.00633881569345961	0.0354219336375753	550287	14.835131	550287	proteasome 26S subunit, non-ATPase 4b	psmd4b	NA
ENSDARG00000023287	1749.53416006699	2.03952091373318	0.248189726788231	8.21758797242003	2.0763691691604e-16	1.39751180468768e-13	393335	14.842841	393335	hydroxysteroid (17-beta) dehydrogenase 3	hsd17b3	NA
ENSDARG00000023299	84.2062530647244	1.36557173362604	0.274309539261494	4.97821452838454	6.41735055752688e-07	2.75695751788788e-05	321114	14.82921	321114	SNU13 homolog, small nuclear ribonucleoprotein b (U4/U6.U5)	snu13b	NA
ENSDARG00000023309	40.054967169499	0.513025369990045	0.188876143838611	2.7161999369725	0.00660360252246817	0.0365475763178172	100005939	14.823884	100005939	SPRY domain containing 4	spryd4	NA
ENSDARG00000023330	217.1432978577	0.505254261328738	0.127150756341541	3.97366304272364	7.07756709285172e-05	0.00126095184308674	322000	15.2150755	322000	acidic (leucine-rich) nuclear phosphoprotein 32 family, member B	anp32b	NA
ENSDARG00000023394	570.444857967782	0.415127349533467	0.119968642091615	3.4602988105546	0.000539576270995801	0.00596983244120012	406287	14.853864	406287	solute carrier family 37 (glucose-6-phosphate transporter), member 2	slc37a2	NA
ENSDARG00000023672	103.376943865976	0.384486237037221	0.135125076242801	2.84540995445104	0.0044354297929869	0.0274579621574023	445243	14.544415	445243	translocase of inner mitochondrial membrane 8 homolog A (yeast)	timm8a	NA
ENSDARG00000023703	43.2770457276876	0.463819177903598	0.180300371258782	2.57248043731361	0.0100972662202961	0.0497877005530676	436601	15.22285	436601	potassium channel tetramerization domain containing 6b	kctd6b	NA
ENSDARG00000023712	2149.16852032802	-0.231896427017544	0.0894503992085852	-2.59245826814921	0.00952927417117207	0.0475678436686237	404730	14.823151	404730	monoamine oxidase	mao	NA
ENSDARG00000023878	149.776465940239	0.38364111490812	0.109391726764182	3.50703957471247	0.000453121754272897	0.00522318749097635	406786	14.82419	406786	serine/threonine kinase 24b (STE20 homolog, yeast)	stk24b	NA
ENSDARG00000024017	24.2617077728315	1.09791219109904	0.309957596002567	3.54213674792453	0.000396899658933648	0.00470493088843556	368826	14.852479	368826	MAM domain containing glycosylphosphatidylinositol anchor 2a	mdga2a	NA
ENSDARG00000024026	78.1618403670467	0.803941025003463	0.239661908534731	3.35447977494078	0.000795143655934312	0.00795471956370288	336879	15.209884	336879	stromal cell-derived factor 2	sdf2	NA
ENSDARG00000024032	18.2626182520461	1.11257052409988	0.426490162733323	2.60866632179638	0.00908958276233954	0.046230182689229	368851	14.837396	368851	coagulation factor C homolog, cochlin (Limulus polyphemus)	coch	NA
ENSDARG00000024092	314.777380604688	-0.493402681362134	0.187064078247217	-2.63761319642604	0.00834917551267078	0.0432820972768534	557300	15.2150755	557300	limb development membrane protein 1	lmbr1	NA
ENSDARG00000024124	65.5402339692728	0.531094853043238	0.183557438972071	2.89334420886122	0.00381163329039325	0.0245240399063854	550448	15.2150755	550448	SDE2 telomere maintenance homolog (S. pombe)	sde2	NA
ENSDARG00000024195	159.794833686134	-0.833938166080722	0.259173940619786	-3.2176775338078	0.00129233021042749	0.0112233551966517	566703	14.852479	566703	zinc finger protein 395b	znf395b	NA
ENSDARG00000024276	17.1608518384274	2.10136842858138	0.660838328909461	3.17985252466989	0.00147350021276163	0.0123710707398525	406391	14.593284	406391	poly(rC) binding protein 4	pcbp4	NA
ENSDARG00000024398	218.179856190046	0.451594371004845	0.116478204200004	3.87707188745299	0.000105721128764465	0.0016986889588614	796309	14.834426	796309	golgi to ER traffic protein 4 homolog (S. cerevisiae)	get4	NA
ENSDARG00000024416	65.9944582910469	0.738069152144462	0.282131754929492	2.6160442390787	0.00889550314597466	0.0454338198201868	402856	14.825785	402856	TWIST neighbor	twistnb	NA
ENSDARG00000024561	159.062595175294	0.676489358428162	0.258118537468983	2.6208476348176	0.00877114531950308	0.0449692871543715	561131	14.825805	561131	nucleolar and coiled-body phosphoprotein 1	nolc1	NA
ENSDARG00000024631	77.7862955528038	-0.475950859544646	0.155999025903529	-3.05098609935537	0.00228091134301789	0.0170997777974392	100535184	14.883119	100535184	NLR family, CARD domain containing 5	nlrc5	NA
ENSDARG00000024694	920.16596263598	-0.489692669103241	0.0912038684366342	-5.36920941509697	7.90825476454018e-08	4.79042532362022e-06	541515	14.833017	541515	myosin IB	myo1b	NA
ENSDARG00000024717	672.512609464764	-0.436706541230571	0.160261281353348	-2.72496599018018	0.00643081109185905	0.0357874489563033	393542	14.593284	393542	selenium binding protein 1	selenbp1	NA
ENSDARG00000024744	16.2159140250743	2.09331269035886	0.620658667739899	3.37272771518935	0.000744275141646534	0.00757085922841962	566832	14.834426	566832	dipeptidyl-peptidase 6b	dpp6b	NA
ENSDARG00000024815	52.2529473360724	-0.869096166976991	0.318780400192579	-2.726316192752	0.00640456126562544	0.0356905518551298	368398	15.22285	368398	opioid growth factor receptor-like 2	ogfrl2	NA
ENSDARG00000024818	57.4319539358389	0.572157607400041	0.188089020157552	3.04195112995311	0.00235050052467958	0.0175023441035606	100004718	14.824423	100004718	Rab interacting lysosomal protein-like 2	rilpl2	NA
ENSDARG00000024844	255.285821775438	0.446815725805362	0.144603478040354	3.08993761326177	0.00200198541898382	0.0155763685946013	30467	14.824423	30467	myc associated factor X	max	NA
ENSDARG00000025089	39.5107582383565	1.15863080652683	0.429134701887827	2.69992336072995	0.00693554507702811	0.0378879601814238	100320658	14.82342	100320658	lysyl oxidase-like 4	loxl4	NA
ENSDARG00000025285	52.3034476727308	0.557826044083359	0.203720719261268	2.7381900383336	0.0061778365686071	0.0346984191138967	393890	14.853864	393890	pannexin 1a	panx1a	NA
ENSDARG00000025338	1295.70260002162	0.223652169455502	0.0773599774134519	2.89105784325903	0.00383947445387867	0.0246634321361294	336977	14.531645	336977	hydroxyacylglutathione hydrolase	hagh	NA
ENSDARG00000025340	127.890795143502	0.412678245360838	0.121320646739872	3.40154999540744	0.000670048712437622	0.00700431892864634	436675	14.852479	436675	tumor suppressor candidate 2b	tusc2b	NA
ENSDARG00000025348	352.179264411988	-0.51765682368693	0.129834185141556	-3.98706105886164	6.68968137782385e-05	0.0012042420489203	403039	14.544127	403039	insulin-like growth factor binding protein 5b	igfbp5b	NA
ENSDARG00000025467	51.7252856043223	0.794121327168251	0.237370564725832	3.34549200776212	0.000821367263236362	0.00809013365374677	559477	14.854555	559477	apoptosis antagonizing transcription factor	aatf	NA
ENSDARG00000025468	34.3240728199901	-0.687683453400318	0.191565183533809	-3.58981439484253	0.000330913498603869	0.00412875080904827	323563	14.880566	323563	BCL2/adenovirus E1B interacting protein 3-like a	bnip3la	NA
ENSDARG00000025549	151.231772084358	0.412645120688781	0.155233734823092	2.65821808100566	0.00785550426112637	0.0415043323696232	503714	14.833017	503714	NADH dehydrogenase (ubiquinone) complex I, assembly factor 1	ndufaf1	NA
ENSDARG00000025559	190.729155386674	0.812286201582912	0.145368226279529	5.58778367441153	2.29985881752259e-08	1.6886539135931e-06	563203	14.852479	563203	peroxisomal biogenesis factor 11 gamma	pex11g	NA
ENSDARG00000025605	68.3541059971772	0.535712680689023	0.162692156100983	3.29279968701446	0.000991951194632679	0.0093014618598877	406805	14.852479	406805	nuclear VCP-like	nvl	NA
ENSDARG00000025788	55.0232749907016	-1.1066105153798	0.321074348582493	-3.44658650018402	0.000567716788312993	0.00619071907327805	327599	14.82419	327599	calcineurin-like EF-hand protein 2	chp2	NA
ENSDARG00000025854	54.0058271253584	0.488924046952862	0.184444990769318	2.65078517401619	0.00803049016690903	0.0421713863771577	445387	14.823164	445387	DEAD (Asp-Glu-Ala-Asp) box polypeptide 51	ddx51	NA
ENSDARG00000025903	18.2185625256187	-1.71577672278534	0.485804044032302	-3.53182881835222	0.000412696417110807	0.00484304988155386	337597	14.833097	337597	lectin, galactoside-binding, soluble, 9 (galectin 9)-like 1	lgals9l1	NA
ENSDARG00000025953	49.6576642322569	-0.575866311532469	0.214597748959244	-2.68346855605571	0.00728628266345825	0.0393353171397267	327510	14.815266	327510	ras homolog family member Q	rhoq	NA
ENSDARG00000026017	15.6794062051844	-1.58363212410164	0.530247802120885	-2.98658875674247	0.00282108933713899	0.0199053566216883	394007	14.835131	394007	X-prolyl aminopeptidase (aminopeptidase P) 2, membrane-bound	xpnpep2	NA
ENSDARG00000026166	267.042901528252	-0.985528973452546	0.160161245203813	-6.15335484060712	7.58608116013649e-10	9.283371035864e-08	ENSDARG00000026166	14.823151	NA	elastin microfibril interfacer 1b	emilin1b	NA
ENSDARG00000026198	36.593801170125	1.0208963218917	0.225418165245578	4.52889997032629	5.92915583782789e-06	0.000164374652117357	431773	14.815266	431773	enolase-phosphatase 1	enoph1	NA
ENSDARG00000026348	484.896873563675	-1.48685410782835	0.287198488237511	-5.1770958717538	2.25366421873953e-07	1.21889026830488e-05	492476	14.825785	492476	cysteine sulfinic acid decarboxylase	csad	NA
ENSDARG00000026376	122.515031280302	-2.06885095026127	0.205574501049897	-10.0637527499537	7.98935444016115e-24	2.41977572606381e-20	568448	15.2045145	568448	aconitase 1, soluble	aco1	NA
ENSDARG00000026453	91.9796713061216	0.545632840141959	0.127759144112491	4.27079285739055	1.94779260228994e-05	0.000437801621089845	327500	14.879544	327500	zgc:66474	zgc:66474	NA
ENSDARG00000026476	800.379455146718	0.265025004919495	0.0962652340959532	2.75307079869903	0.00590391270906133	0.0335487347421567	323447	15.2045145	323447	cytotoxic granule-associated RNA binding protein 1, like	tia1l	NA
ENSDARG00000026540	99.7092599909252	0.600420214317434	0.14363352351268	4.18022338820107	2.91222866517873e-05	0.000606213922313407	326723	14.833816	326723	protein phosphatase 4, regulatory subunit 2a	ppp4r2a	NA
ENSDARG00000026548	332.129283685067	-0.439688182882257	0.156974518078311	-2.80101629401344	0.00509419468121233	0.0303571906359505	556280	15.2045145	556280	cytochrome P450, family 2, subfamily U, polypeptide 1	cyp2u1	NA
ENSDARG00000026629	198.71873467276	-0.407699465612738	0.114401171009696	-3.56377003849187	0.000365566246470434	0.00443771049698327	393461	14.833097	393461	GDP-mannose 4,6-dehydratase	gmds	NA
ENSDARG00000026829	190.28516945065	-0.804389979164769	0.297017475267463	-2.70822441824482	0.00676442642846431	0.0372335421085166	336381	14.829012	336381	coactosin-like F-actin binding protein 1	cotl1	NA
ENSDARG00000026862	226.889858858475	0.327860509392176	0.0922519548767654	3.55396814983648	0.000379465165891857	0.00455006186237382	378716	14.825785	378716	akt interacting protein	aktip	NA
ENSDARG00000026865	40.5376670298086	-0.690395998112667	0.203602401201182	-3.39090302491314	0.00069662745697545	0.00719492041027927	386641	14.825785	386641	family with sequence similarity 107, member B	fam107b	NA
ENSDARG00000026895	14.1821502142222	-1.28045075229476	0.327622361191584	-3.90831305786846	9.29428233802803e-05	0.00155096736260619	393830	14.82342	393830	torsin family 1 like 3	tor1l3	NA
ENSDARG00000026907	22.3870711419843	-2.31049374015742	0.299918381929643	-7.70374168229351	1.32138833403682e-14	6.40344786674241e-12	436697	15.209884	436697	solute carrier family 48 (heme transporter), member 1a	slc48a1a	NA
ENSDARG00000026908	654.96235283137	0.363350983546006	0.140245644720824	2.59081830504827	0.00957480291253401	0.0477557584542402	321550	14.824423	321550	transmembrane p24 trafficking protein 2	tmed2	NA
ENSDARG00000027041	12.3403960152644	-1.5940775687076	0.350145974983362	-4.55260857641831	5.29847996927736e-06	0.000150906274985487	561336	14.8804035	561336	protocadherin 17	pcdh17	NA
ENSDARG00000027070	32.0646628223463	-1.2041063572381	0.343557401924103	-3.5048185557769	0.000456918571000841	0.00525196251202579	406368	15.2045145	406368	acyl-CoA binding domain containing 4	acbd4	NA
ENSDARG00000027159	25.3050970292343	-0.666513482748838	0.227874358259139	-2.92491655419553	0.00344548600886407	0.0228978805264506	556288	14.833816	556288	F-box protein 28	fbxo28	NA
ENSDARG00000027172	77.0179748516495	-0.874660276809701	0.191469384229549	-4.56814691460588	4.92055103863764e-06	0.000142613578548074	570136	14.833489	570136	phosphatase and actin regulator 2	phactr2	NA
ENSDARG00000027222	115.964940854989	-1.20110476775087	0.274498378196605	-4.37563520645139	1.21079361975434e-05	0.000296338680875229	324948	14.544127	324948	adhesion G protein-coupled receptor G1	adgrg1	NA
ENSDARG00000027316	479.499021522338	0.922572976213339	0.176921790182837	5.21458083405056	1.84233352294166e-07	1.0099488973049e-05	406293	14.833097	406293	t-complex 11, testis-specific-like 2	tcp11l2	NA
ENSDARG00000027418	126.168648654526	0.431884815484698	0.143868069408964	3.00195044848352	0.00268255837120492	0.0191705035637207	393737	15.209884	393737	trafficking protein particle complex 4	trappc4	NA
ENSDARG00000027495	30.1713491362957	-1.64230004316709	0.335371703133919	-4.89695471567944	9.7333257093312e-07	3.77946285155601e-05	335732	14.835131	335732	ELOVL fatty acid elongase 4b	elovl4b	NA
ENSDARG00000027500	94.4133645454618	-0.805207730069226	0.185615268847784	-4.33804683778223	1.43754523950127e-05	0.00034350809815696	394150	14.833489	394150	oxidative stress responsive 1b	oxsr1b	NA
ENSDARG00000027529	1378.47720714567	2.6926733308167	0.497748290662305	5.40970884547654	6.31272949853382e-08	3.99917987079721e-06	791518	14.8207245	791518	heme oxygenase 1a	hmox1a	NA
ENSDARG00000027572	594.854843360199	0.533571850135546	0.0939512903079614	5.67923919284727	1.35295171742784e-08	1.09089606017886e-06	664699	14.544415	664699	arsenite methyltransferase	as3mt	NA
ENSDARG00000027600	90.4613031833698	0.761547730944134	0.177416597658276	4.29242664438285	1.76730946528401e-05	0.000409646746593589	393165	15.207947	393165	PDZ and LIM domain 5b	pdlim5b	NA
ENSDARG00000027649	199.614885051076	0.477354972009893	0.124309216102325	3.84006099448779	0.000123003746138235	0.00192531057424382	324554	14.854625	324554	cleavage and polyadenylation specific factor 3	cpsf3	NA
ENSDARG00000027797	131.927160956203	-1.35004636350376	0.258470890075379	-5.22320468316584	1.75852821851599e-07	9.68389516696418e-06	560807	14.854555	560807	adenylate cyclase 6b	adcy6b	NA
ENSDARG00000027807	45.9719240834175	-0.937466625580334	0.355411148200933	-2.63769617336352	0.00834713304189796	0.0432820972768534	567549	14.8804035	567549	fyn-related Src family tyrosine kinase	frk	NA
ENSDARG00000027825	263.135746047329	0.530242420137603	0.181965986567249	2.9139644729244	0.00356870517123408	0.0234716955209017	445229	14.835131	445229	N(alpha)-acetyltransferase 50, NatE catalytic subunit	naa50	NA
ENSDARG00000027899	281.832373976845	0.376377495661301	0.103259255607833	3.64497587597126	0.000267416884947035	0.00347986633848908	ENSDARG00000027899	14.833017	NA	split hand/foot malformation (ectrodactyly) type 1	shfm1	NA
ENSDARG00000028071	1229.62425090658	0.433570452421408	0.113519709132862	3.81934076235133	0.000133808806734456	0.00205722549947708	572452	14.880566	572452	bone morphogenetic protein 1a	bmp1a	NA
ENSDARG00000028082	79.2808660110961	0.736503417489292	0.159449445685507	4.61904031288983	3.85518959087627e-06	0.000116913001569758	436608	14.839825	436608	mitogen-activated protein kinase-activated protein kinase 5	mapkapk5	NA
ENSDARG00000028119	336.581635271493	0.370719863579366	0.11159441020229	3.32202896997575	0.000893654149117923	0.00862678885781963	406398	14.82921	406398	small ubiquitin-like modifier 3a	sumo3a	NA
ENSDARG00000028198	650.301803550678	0.181964079407283	0.0693427627616537	2.62412502992899	0.00868718886979153	0.0446522245046773	406836	14.593284	406836	ubiquitin-conjugating enzyme E2 variant 2	ube2v2	NA
ENSDARG00000028275	47.2239932056558	0.858870021394715	0.294400262783545	2.91735480557703	0.00353013959785829	0.0232899275833276	323424	14.838266	323424	sulfotransferase family 1, cytosolic sulfotransferase 1	sult1st1	NA
ENSDARG00000028335	299.618290794458	0.352941696162289	0.123076801317234	2.86765411828159	0.0041352734246429	0.0260388968500773	406447	14.592722	406447	high mobility group AT-hook 1a	hmga1a	NA
ENSDARG00000028379	53.4554738440611	0.488741227010142	0.183282051338807	2.66660714150715	0.007662117938633	0.0407445184885774	431747	14.839825	431747	TruB pseudouridine (psi) synthase family member 2	trub2	NA
ENSDARG00000028386	140.954710965136	-0.992619717104791	0.307947326727702	-3.22334253605163	0.00126703939493249	0.011059209127959	64605	14.835131	64605	HIV-1 Tat interactive protein 2	htatip2	NA
ENSDARG00000028478	59.3697363527793	0.895485608338124	0.268152481240964	3.33946418915823	0.000839401727256295	0.00823429305725507	569089	14.833017	569089	si:ch211-173n18.3	si:ch211-173n18.3	NA
ENSDARG00000028517	235.663737951611	0.698315929870419	0.271310399492326	2.57386348321739	0.0100569946547886	0.0496688322647237	554137	14.8804035	554137	HMG-box transcription factor 1	hbp1	NA
ENSDARG00000028533	329.940060870861	-0.463394867482817	0.143218672985977	-3.2355757655162	0.0012139766279973	0.0107509699182656	562190	14.593083	562190	microtubule-actin crosslinking factor 1a	macf1a	NA
ENSDARG00000028688	43.7201778252314	0.795079309868268	0.269329003848289	2.95207459466983	0.00315646668029144	0.0215197489205013	550234	14.825805	550234	exosome component 2	exosc2	NA
ENSDARG00000028731	17.2815363564871	-1.11991438439316	0.39395004210973	-2.84278275081697	0.00447215428746968	0.027657043998313	368519	14.37014	368519	signal transducer and activator of transcription 4	stat4	NA
ENSDARG00000028943	469.277614883721	-0.845871932650772	0.205359620177351	-4.1189788524164	3.80555066329151e-05	0.000759542772418066	560413	14.543775	560413	metastasis suppressor 1-like a	mtss1la	NA
ENSDARG00000028957	82.4581689850322	-0.483924838443462	0.156722539930154	-3.08778072802503	0.00201657204751232	0.0156306912064055	393307	14.544127	393307	v-maf avian musculoaponeurotic fibrosarcoma oncogene homolog F	maff	NA
ENSDARG00000029011	85.9740593705473	-0.592132402291215	0.216023650487137	-2.74105358814161	0.00612425182699938	0.034461361302414	406253	14.547449	406253	X-prolyl aminopeptidase (aminopeptidase P) 1, soluble	xpnpep1	NA
ENSDARG00000029043	24.6284852089896	0.626720061859439	0.236480365337196	2.65019914429599	0.00804443382650996	0.0421999704164567	406491	14.823164	406491	nucleoporin like 2	nupl2	NA
ENSDARG00000029058	61.9851738197194	0.704232142324054	0.244418293905423	2.88125790861036	0.00396091384893452	0.0252294801681607	321726	14.853864	321726	retinoblastoma binding protein 4	rbbp4	NA
ENSDARG00000029063	534.865232298417	0.351713404309134	0.108214886810898	3.25013881799593	0.00115348687507141	0.0103648021354479	ENSDARG00000029063	14.82342	NA	caseinolytic mitochondrial matrix peptidase chaperone subunit a	clpxa	NA
ENSDARG00000029107	52.3043150280129	0.489270063687657	0.186997881801211	2.616447090068	0.00888501333148107	0.0454030337115259	394085	14.834426	394085	ubiquitin-conjugating enzyme E2D 1a	ube2d1a	NA
ENSDARG00000029146	865.690667990415	0.668539370325507	0.160828683957311	4.15684163966024	3.22677494099513e-05	0.000661461563623621	565797	15.2150755	565797	low density lipoprotein receptor-related protein 1Ab	lrp1ab	NA
ENSDARG00000029170	125.455451666815	0.444843644022887	0.12670181165652	3.51094935586893	0.000446509454904469	0.00515677983428756	565799	14.823151	565799	si:ch211-200p22.4	si:ch211-200p22.4	NA
ENSDARG00000029252	383.053309920357	0.796658567172201	0.16725322248053	4.76318814882589	1.90558010058372e-06	6.5772372987384e-05	321504	14.879544	321504	Sjogren syndrome antigen B (autoantigen La)	ssb	NA
ENSDARG00000029381	141.208648300468	-1.66592336902535	0.197319761846687	-8.44275988088684	3.09931354344484e-17	2.20871668110789e-14	447920	15.207947	447920	aldehyde dehydrogenase 3 family, member A2b	aldh3a2b	NA
ENSDARG00000029445	285.62530303738	0.900417643365439	0.17145671231114	5.25157418002664	1.50804775810446e-07	8.53738251842779e-06	393273	14.824423	393273	zgc:56676	zgc:56676	NA
ENSDARG00000029473	47.6455922987759	0.588920696090794	0.225869120899854	2.60735373540463	0.0091245043684456	0.0463494215613075	571365	14.833816	571365	glutathione S-transferase mu tandem duplicate 2	gstm.2	NA
ENSDARG00000029497	1044.17818494212	0.902205460477634	0.230389279409475	3.916004524126	9.00285590328454e-05	0.00152758542392566	431761	14.829012	431761	transcription factor CP2-like 1	tfcp2l1	NA
ENSDARG00000029510	341.054556037766	0.934997097921246	0.239013875592805	3.91189463625178	9.1574865391714e-05	0.00153660594767398	ENSDARG00000029510	14.883119	NA	translocase of inner mitochondrial membrane 17 homolog A (yeast)	timm17a	NA
ENSDARG00000029524	384.978779580319	0.970073995231477	0.241365450773726	4.01910875032772	5.8418703756921e-05	0.00107723378388904	338306	14.82342	338306	IMP (inosine 5'-monophosphate) dehydrogenase 1b	impdh1b	NA
ENSDARG00000029544	18.906482357144	0.734949914008916	0.268148038700341	2.74083643337862	0.00612830066196511	0.034468134874516	321364	14.543792	321364	inhibitor of DNA binding 2b	id2b	NA
ENSDARG00000029612	56.2693462886425	0.460675246816367	0.158330667380298	2.90957686491563	0.00361918379306928	0.0236751682791762	368735	14.531645	368735	G patch domain and KOW motifs	gpkow	NA
ENSDARG00000029695	73.639101672419	1.06912552147442	0.287677090468319	3.71640828170905	0.000202074949138297	0.0028139517342649	792824	15.2045145	792824	phosphoglycolate phosphatase	pgp	NA
ENSDARG00000029747	21.3694744978242	-4.09092217825872	1.1568266351078	-3.5363312480072	0.000405725617324355	0.00477219985814035	553530	15.2150755	553530	meprin A, alpha (PABA peptide hydrolase), tandem duplicate 1	mep1a.1	NA
ENSDARG00000029766	145.707233887214	-0.730663729226786	0.156394035577425	-4.67194114231462	2.98366467098548e-06	9.48742716246434e-05	565875	14.837396	565875	nuclear receptor subfamily 1, group I, member 2	nr1i2	NA
ENSDARG00000029885	194.236576643805	0.55533452598504	0.134631737070564	4.12484112638295	3.7099075584633e-05	0.000744121259601123	406674	14.82921	406674	RAB41, member RAS oncogene family	rab41	NA
ENSDARG00000029911	255.206684226888	0.357307229537657	0.126542453099017	2.82361548071201	0.00474853160284688	0.0288652585893076	403025	14.825805	403025	cancer susceptibility candidate 3	casc3	NA
ENSDARG00000029928	53.6122161220054	-0.495484278360125	0.172942184743426	-2.86502844343742	0.00416971787102757	0.0262149102270363	266798	14.833816	266798	adaptor-related protein complex 3, mu 1 subunit	ap3m1	NA
ENSDARG00000030012	701.457528526678	0.499971286911867	0.15296572112016	3.26851848407999	0.00108112115600775	0.0099075512897382	407677	15.209884	407677	leucine rich repeat (in FLII) interacting protein 1a	lrrfip1a	NA
ENSDARG00000030053	1266.31485860827	-0.36802202003801	0.121838542921156	-3.02057141537028	0.00252298202339603	0.0184021235481294	560745	14.8207245	560745	eukaryotic translation elongation factor 1 delta b (guanine nucleotide exchange protein)	eef1db	NA
ENSDARG00000030108	140.953019305026	0.463381854880955	0.173542978042085	2.67012736619388	0.00758224796325102	0.0404486719836134	114464	15.2150755	114464	SEC22 homolog B, vesicle trafficking protein a	sec22ba	NA
ENSDARG00000030116	337.830588534113	-0.436150046257243	0.121622018667984	-3.58611089532963	0.000335646269895328	0.00415782674824325	336888	15.207947	336888	sushi domain containing 6	susd6	NA
ENSDARG00000030156	23.9954471032989	0.753793343095272	0.259839931269574	2.90099115794962	0.00371984374522755	0.0240608152554361	560126	14.854625	560126	N-acetylglucosaminidase, alpha	naglu	NA
ENSDARG00000030177	62.1552189002339	0.751218776534732	0.275476001834045	2.72698446156224	0.00639160488645457	0.0356347414631372	554104	14.835336	554104	ubiquitin carboxyl-terminal esterase L3 (ubiquitin thiolesterase)	uchl3	NA
ENSDARG00000030289	17.2792004213667	-0.941329415244468	0.344624013376452	-2.73146785687335	0.00630528912176156	0.0352671180563903	140421	14.833489	140421	jagged 1a	jag1a	NA
ENSDARG00000030560	299.392837220943	-0.39042125324402	0.115292654288719	-3.38634976922568	0.000708290452629599	0.00727814998609634	406550	14.823884	406550	helicase with zinc finger	helz	NA
ENSDARG00000030598	59.0736992159383	-0.725845143143437	0.261167527558172	-2.77923197393583	0.00544875985754997	0.0318552606101105	100330160	14.825785	100330160	nicotinamide phosphoribosyltransferase a	nampta	NA
ENSDARG00000030604	35.6147367725705	3.53592229996451	0.473988397617902	7.45993428897164	8.65656413002968e-14	3.1780083162215e-11	565379	14.825805	565379	phosphorylase kinase, gamma 1a (muscle)	phkg1a	NA
ENSDARG00000030687	139.88008554927	1.45711054871503	0.224062351563689	6.50314762183888	7.8656538473852e-11	1.34214642762073e-08	556199	14.834426	556199	phosphorylase kinase, alpha 2 (liver)	phka2	NA
ENSDARG00000030700	92.6741786251556	1.57411319690036	0.326010695624875	4.82840967497464	1.37627733921211e-06	5.00708707644284e-05	322089	14.829012	322089	CTP synthase 1a	ctps1a	NA
ENSDARG00000030781	690.457140314273	-0.317350588829595	0.121072002971879	-2.62117236883663	0.00876279442714327	0.0449454930079766	445288	15.2045145	445288	acyl-CoA dehydrogenase short chain	acads	NA
ENSDARG00000030782	97.1780011313235	-0.831658196888764	0.223741695214393	-3.71704610574197	0.000201565670106663	0.00281008986575629	565839	14.834426	565839	exocyst complex component 3-like 2b	exoc3l2b	NA
ENSDARG00000030789	245.627051043755	1.24335338631628	0.236420228121978	5.2590820852892	1.44776257068362e-07	8.2734167659585e-06	321127	14.839874	321127	DEAD (Asp-Glu-Ala-Asp) box polypeptide 18	ddx18	NA
ENSDARG00000030805	18.8059893713971	0.735994471749486	0.260998349417528	2.81992002398487	0.00480356198400997	0.0291121327845327	777606	14.852479	777606	zinc finger, HIT-type containing 2	znhit2	NA
ENSDARG00000030957	274.061171844546	0.38021243302167	0.103211052857412	3.68383445857237	0.000229751480812556	0.00312394970824256	405827	14.8207245	405827	Yip1 domain family, member 4	yipf4	NA
ENSDARG00000030981	28.1150659947467	-0.897837089634023	0.253404616625435	-3.54309681327212	0.000395457496587692	0.00469702703054891	553545	14.823164	553545	transmembrane protein 127	tmem127	NA
ENSDARG00000031046	341.721963598601	-0.482790606754044	0.14865363916	-3.24775504644324	0.00116319362996556	0.0104154403747471	557500	14.839825	557500	nuclear receptor subfamily 1, group H, member 5	nr1h5	NA
ENSDARG00000031098	65.3891892588929	0.725341035914416	0.279636221135034	2.59387368692897	0.00949013456282711	0.0474231863540049	393638	15.209884	393638	translocase of inner mitochondrial membrane 50 homolog (S. cerevisiae)	timm50	NA
ENSDARG00000031108	100.554259644199	-0.357876826248955	0.126200196765861	-2.83578659479369	0.00457129800203934	0.0281131534352944	562379	14.538103	562379	im:7138144	im:7138144	NA
ENSDARG00000031198	18.3946493186128	0.723570094686674	0.269891985152018	2.68096177172182	0.00734109017439226	0.0395276922056721	326908	14.531645	326908	high mobility group 20A	hmg20a	NA
ENSDARG00000031240	281.057619457256	-0.841858520750515	0.148512071088854	-5.66862016385751	1.43952095519742e-08	1.11793566488569e-06	570732	14.82342	570732	kinase D-interacting substrate 220a	kidins220a	NA
ENSDARG00000031261	86.6312504464388	0.448800092591662	0.12879822247778	3.484520857181	0.000493019035397065	0.00557696135745606	321738	14.854625	321738	SAP30 binding protein	sap30bp	NA
ENSDARG00000031293	28.618046024394	0.745908166759156	0.248079674167148	3.0067282588278	0.00264075711303351	0.0189980833874115	436706	14.593083	436706	DnaJ (Hsp40) homolog, subfamily C, member 9	dnajc9	NA
ENSDARG00000031336	123.60616343502	1.30286601861602	0.320248868293233	4.06829234263856	4.73589404025679e-05	0.000909276644971649	368367	14.853864	368367	hydroxysteroid (20-beta) dehydrogenase 2	hsd20b2	NA
ENSDARG00000031346	78.0625356352286	0.607416915501596	0.149913137200832	4.05179243689543	5.08267464350088e-05	0.000962134426656455	393889	14.838869	393889	RNA binding motif protein 17	rbm17	NA
ENSDARG00000031359	33.1003596135321	-0.583379400643677	0.217177114652462	-2.68619187420935	0.00722715728492584	0.0390879511191413	570478	14.834426	570478	cytidine monophosphate (UMP-CMP) kinase 2, mitochondrial	cmpk2	NA
ENSDARG00000031366	61.2710602928234	0.524936001292235	0.152690193247659	3.43791562592892	0.000586210325772586	0.00632971309869419	393323	14.833097	393323	reticulon 4 interacting protein 1	rtn4ip1	NA
ENSDARG00000031382	12.7708384825209	-3.323390400653	0.543576224167046	-6.11393628510083	9.72031276717618e-10	1.14331639975087e-07	568927	14.833097	568927	receptor accessory protein 2	reep2	NA
ENSDARG00000031422	283.388697259438	-1.10737208039691	0.124016679016667	-8.92921895004209	4.29027001235825e-19	4.72514738179275e-16	798920	14.8207245	798920	insulin-like growth factor binding protein 2b	igfbp2b	NA
ENSDARG00000031495	470.39877328906	0.391404396164477	0.126838090820874	3.08585846437278	0.00202965409810378	0.0157019536389063	323501	14.842841	323501	SET nuclear proto-oncogene a	seta	NA
ENSDARG00000031496	97.313266476023	0.635709395155359	0.18736777629622	3.39284271672378	0.000691713429392581	0.00718089819802153	100332265	15.209884	100332265	adaptor-related protein complex 1 associated regulatory protein	ap1ar	NA
ENSDARG00000031506	219.009597214745	0.50761180367358	0.148353188658848	3.42164403921832	0.000622437454562426	0.00666757668510457	569329	14.842841	569329	feline leukemia virus subgroup C cellular receptor family, member 2b	flvcr2b	NA
ENSDARG00000031616	1719.83681053548	0.636437623924172	0.215797267873202	2.949238561714	0.00318557970378763	0.0216754470132399	445118	14.854625	445118	glucose-6-phosphatase a, catalytic subunit, tandem duplicate 1	g6pca.1	NA
ENSDARG00000031657	208.268305066832	0.387931118819941	0.12921210598203	3.00228152673164	0.00267964236999513	0.0191705035637207	553762	14.833489	553762	fumarylacetoacetate hydrolase domain containing 1	fahd1	NA
ENSDARG00000031715	43.3909857516179	-1.01707835748215	0.35522577741812	-2.86318849063984	0.00419400984981321	0.0262993940633991	NA	NA	NA	NA	NA	TRUE
ENSDARG00000031720	317.186031995224	-0.518965277078867	0.119437482054115	-4.34507884923204	1.39225644161437e-05	0.000334003698815011	777737	15.2045145	777737	calsyntenin 1	clstn1	NA
ENSDARG00000031768	19.4235697801366	-1.29682240574871	0.315559279716987	-4.10959996775181	3.9634510961833e-05	0.000787167377545258	564951	14.825785	564951	RAR-related orphan receptor A, paralog a	roraa	NA
ENSDARG00000031774	82.1870504318436	0.774730412266688	0.233956334243558	3.31143165997874	0.000928199083612585	0.0088754000773216	402995	15.207947	402995	pseudouridylate synthase 7 (putative)	pus7	NA
ENSDARG00000031775	50.0834605297985	0.466053129239406	0.16702803213139	2.79026893445521	0.00526642764764335	0.0310626927707883	565498	14.835336	565498	ubiquitin-conjugating enzyme E2S	ube2s	NA
ENSDARG00000031795	390.073827334347	0.907301582689118	0.176428273233703	5.1426087557252	2.70949497866861e-07	1.37922401960379e-05	406467	14.880566	406467	ATP-binding cassette, sub-family F (GCN20), member 1	abcf1	NA
ENSDARG00000031796	83.0016939695531	-0.526199010332936	0.181590278214008	-2.89772676989238	0.00375877892997654	0.02427377757818	114549	14.543538	114549	acetylcholinesterase	ache	NA
ENSDARG00000031848	118.817787610503	-0.983730998270552	0.199965273902042	-4.91950916813915	8.67615046585734e-07	3.46121018125065e-05	ENSDARG00000031848	15.207947	NA	peroxisome proliferator-activated receptor gamma	pparg	NA
ENSDARG00000031915	98.75213325758	0.431691113400855	0.160304694306144	2.69294118471931	0.00708247617870053	0.038477219239891	373126	14.82419	373126	hypoxia inducible factor 1, alpha subunit inhibitor	hif1an	NA
ENSDARG00000032155	42.934550977254	-0.902516094564677	0.215374445748276	-4.1904511532418	2.78400345751496e-05	0.000585559060551975	30704	14.833097	30704	protein phosphatase, Mg2+/Mn2+ dependent, 1Aa	ppm1aa	NA
ENSDARG00000032161	55.723139736663	-0.635950589175903	0.163962615286033	-3.87863165067528	0.000105045673124002	0.0016923249067783	556198	15.209884	556198	SLIT-ROBO Rho GTPase activating protein 2	srgap2	NA
ENSDARG00000032272	28.3570353946539	1.3368115432476	0.285009247258972	4.69041463076781	2.72651970202354e-06	8.80847631733737e-05	567881	15.2045145	567881	spermidine/spermine N1-acetyltransferase 1b	sat1b	NA
ENSDARG00000032430	506.509152061524	0.297377193970946	0.102984477286911	2.88759240038152	0.00388202566050833	0.0248314365771164	449548	14.543792	449548	protein phosphatase 2, regulatory subunit A, beta b	ppp2r1bb	NA
ENSDARG00000032458	44.1964935114746	-0.492121193432778	0.186490489941331	-2.63885409699764	0.0083186774456617	0.0431915223331271	100005996	15.2045145	100005996	MAP/microtubule affinity-regulating kinase 2b	mark2b	NA
ENSDARG00000032469	142.418605996008	-0.759914043087848	0.261514424203279	-2.90582076075909	0.00366291204572835	0.023858160986021	333997	14.838869	333997	adenosine monophosphate deaminase 3b	ampd3b	NA
ENSDARG00000032482	16.1874995730921	-1.55566024317297	0.378810632087678	-4.10669635801801	4.01358280529745e-05	0.00079581924199965	798260	14.8804035	798260	si:dkey-40c11.2	si:dkey-40c11.2	NA
ENSDARG00000032516	47.4343172714178	0.728181287045058	0.19756393551094	3.68580067592718	0.000227984738635057	0.00311718970370868	321183	14.837396	321183	ribosomal RNA processing 36	rrp36	NA
ENSDARG00000032552	23.5902531602059	-0.744795212285109	0.236518951713877	-3.14898745698022	0.00163837227210056	0.0133482717394071	561952	14.834426	561952	membrane-associated ring finger (C3HC4) 5	march5	NA
ENSDARG00000032553	96.6179083482517	1.04774290884822	0.279827827634631	3.7442412990328	0.000180939699894619	0.00257286908946398	406602	15.2045145	406602	egl-9 family hypoxia-inducible factor 3	egln3	NA
ENSDARG00000032617	47.5734155979699	0.839699857687939	0.316762582889361	2.6508808269859	0.00802821630971371	0.0421713863771577	393347	14.833816	393347	fibroblast growth factor receptor like 1a	fgfrl1a	NA
ENSDARG00000032639	156.695264463828	-3.9515286990005	1.16187512303006	-3.40099260297036	0.00067141644609531	0.00701222940781595	436636	14.835131	436636	CD36 molecule (thrombospondin receptor)	cd36	NA
ENSDARG00000032651	288.190440239401	0.66296479421778	0.120343016892087	5.50895940071261	3.60961138173452e-08	2.49888239369792e-06	192329	14.833489	192329	protein phosphatase 1, regulatory subunit 10	ppp1r10	NA
ENSDARG00000032704	34.2453518875269	0.767230335149371	0.204275885420604	3.7558536758739	0.000172751609239147	0.00247386021977809	327329	14.839874	327329	glutaminyl-tRNA synthase (glutamine-hydrolyzing)-like 1	qrsl1	NA
ENSDARG00000032795	24.8388617307343	-0.860298504484574	0.284536370546524	-3.02350979887792	0.00249860937004752	0.018279379539931	559126	14.823164	559126	transmembrane protein 8A	tmem8a	NA
ENSDARG00000032862	196.777238246862	0.480572591192883	0.146157445331937	3.28804728422461	0.00100884893922992	0.00943799606082666	570913	14.82342	570913	UDP glucuronosyltransferase 5 family, polypeptide G1	ugt5g1	NA
ENSDARG00000032868	250.959777993049	0.942573790992536	0.244551545784219	3.85429496251976	0.000116063602640771	0.0018332601642672	565706	14.829012	565706	phosphodiesterase 4B, cAMP-specific a	pde4ba	NA
ENSDARG00000032876	49.0541415106306	1.00524668933089	0.272920392112686	3.68329636913256	0.000230237215124053	0.00312704468747523	553523	14.853864	553523	tRNA isopentenyltransferase 1	trit1	NA
ENSDARG00000033134	29.4224913234229	0.63418122508223	0.212841523879621	2.97959351879528	0.00288631110572754	0.0202125196797047	767796	14.833017	767796	NADH dehydrogenase (ubiquinone) complex I, assembly factor 7	ndufaf7	NA
ENSDARG00000033160	344.527905802927	-1.45323684361981	0.324884348532973	-4.47308973233692	7.70974047802084e-06	0.000203688233030018	494487	14.592884	494487	nuclear receptor subfamily 1, group d, member 1	nr1d1	NA
ENSDARG00000033172	129.983940288819	0.682953020692477	0.211140023405605	3.23459763656703	0.00121814263304421	0.0107618428424775	30427	14.825805	30427	nuclear receptor subfamily 2, group F, member 5	nr2f5	NA
ENSDARG00000033227	22.7054649362147	-1.1173247450224	0.413485262051988	-2.70221177770036	0.00688798743020272	0.0377251210293426	567278	14.833097	567278	leukocyte cell-derived chemotaxin 2 like	lect2l	NA
ENSDARG00000033285	20.2224392899473	-1.45403364714393	0.516752051162437	-2.813793663466	0.00489606436543632	0.0294873745654102	492500	15.209884	492500	glutathione S-transferase omega 2	gsto2	NA
ENSDARG00000033413	434.9494933344	0.481016809959467	0.144480748640415	3.32927960635522	0.000870709448917781	0.00844695926710315	556673	14.531645	556673	acyl-CoA thioesterase 18	acot18	NA
ENSDARG00000033418	245.482363358511	0.67872198824745	0.12086504593937	5.61553576530238	1.95954117918682e-08	1.47452430968002e-06	448925	15.2150755	448925	G patch domain containing 1	gpatch1	NA
ENSDARG00000033437	21.9934129324716	-1.33725005036464	0.435113853140992	-3.07333365902125	0.00211681662777327	0.016197752482603	ENSDARG00000033437	14.8207245	NA	ribosomal protein S6 kinase a, polypeptide 1	rps6ka1	NA
ENSDARG00000033444	24.5377247814674	-0.712186157407587	0.254348612967447	-2.80003947770196	0.005109635727719	0.0304192810031036	692287	14.543775	692287	mitogen-activated protein kinase kinase kinase kinase 6	map4k6	NA
ENSDARG00000033450	181.64776712069	0.327599391120106	0.124788707091793	2.625232673331	0.00865897737850234	0.0445828775777968	336120	15.2150755	336120	NFKB activating protein	nkap	NA
ENSDARG00000033451	47.7385801403685	0.718904412755944	0.239820713415229	2.99767439817103	0.0027204815495922	0.0193419213458389	492519	15.207947	492519	family with sequence similarity 173, member B	fam173b	NA
ENSDARG00000033735	29.4797394332583	-2.01582636403716	0.774394597679653	-2.60309972471044	0.00923850766478261	0.0466995864226043	378966	14.824423	378966	neutrophil cytosolic factor 1	ncf1	NA
ENSDARG00000033845	1556.64042127832	1.41059353360883	0.193876224220271	7.2757427543369	3.44519553288869e-13	1.09838273370912e-10	567389	14.824423	567389	immunoglobulin superfamily, member 9Ba	igsf9ba	NA
ENSDARG00000034060	123.007047526605	0.728811145552692	0.143084383438098	5.09357574908231	3.51372568341974e-07	1.70958982548716e-05	492652	14.815489	492652	elaC ribonuclease Z 2	elac2	NA
ENSDARG00000034117	26.2620946032327	-1.01335992865501	0.234227965422369	-4.32638317473184	1.5157765284867e-05	0.000360778637379495	30606	14.827688	30606	retinoic acid receptor gamma a	rarga	NA
ENSDARG00000034307	43.8369841419734	0.944046838107368	0.251003660392698	3.76108793246439	0.000169175940050365	0.0024283963432585	445315	14.82419	445315	cholinergic receptor, nicotinic, epsilon	chrne	NA
ENSDARG00000034396	191.107746104462	1.17711742561943	0.173563641552565	6.78205075146991	1.18481834248796e-11	2.81452435671405e-09	338183	14.543792	338183	methionyl-tRNA synthetase	mars	NA
ENSDARG00000034503	186.867759326236	-1.01183218292817	0.188822118586329	-5.35865284482318	8.38447870154979e-08	4.9550224131354e-06	140633	15.2150755	140633	period circadian clock 2	per2	NA
ENSDARG00000034541	92.0659070883436	-0.664749921518022	0.150333458528321	-4.4218361502858	9.7865660728654e-06	0.000248562364722776	30739	14.842841	30739	transforming growth factor beta receptor 2b	tgfbr2b	NA
ENSDARG00000034693	76.1376960041146	0.630018676390804	0.185707238901688	3.3925369851863	0.000692485826760788	0.00718276180754019	561225	14.854555	561225	Myb-like, SWIRM and MPN domains 1	mysm1	NA
ENSDARG00000034700	1070.10316722417	-0.600261281326595	0.128974004109413	-4.6541261199999	3.25357619893935e-06	0.000101590401160181	558154	14.825785	558154	vascular endothelial growth factor Ab	vegfab	NA
ENSDARG00000034714	21.8382947991124	-0.933653953848302	0.267173328644485	-3.49456271921016	0.000474839027935905	0.00541576398168472	567227	14.825805	567227	extended synaptotagmin-like protein 1a	esyt1a	NA
ENSDARG00000034823	366.861868579816	0.399952558636374	0.132686087754768	3.01427651839107	0.00257592910274548	0.0186647016027282	30187	15.2150755	30187	coatomer protein complex, subunit gamma 2	copg2	NA
ENSDARG00000034826	449.686503359886	0.491892572568687	0.141251167064468	3.48239651955714	0.000496947245393885	0.00561091880516954	449674	14.823151	449674	parkinson protein 7	park7	NA
ENSDARG00000034852	149.104659160617	0.712188334447552	0.187251080929749	3.80338704007132	0.00014273109235786	0.00215878549802182	447810	14.546301	447810	5'-nucleotidase, cytosolic II, like 1	nt5c2l1	NA
ENSDARG00000035088	37.5633002714037	1.55897674939305	0.517581340384003	3.01204202654681	0.00259496668513476	0.0187689679942732	ENSDARG00000035088	14.838266	NA	si:ch211-254c8.3	si:ch211-254c8.3	NA
ENSDARG00000035120	882.738106917935	1.61070429737168	0.268523086016083	5.99838293708279	1.99292108687049e-09	2.21506779517761e-07	ENSDARG00000035120	14.830651	NA	glycine decarboxylase	GLDC	NA
ENSDARG00000035264	137.919137597927	0.642446339593667	0.177698634647377	3.61537015109053	0.00029991877746782	0.0038087169696254	407084	14.833017	407084	RIO kinase 2 (yeast)	riok2	NA
ENSDARG00000035285	504.429243054965	-0.509144704392842	0.13356046833628	-3.8120913376173	0.000137795935045094	0.00210251606180267	393246	15.207947	393246	nuclear receptor corepressor 1	ncor1	NA
ENSDARG00000035360	18.0776336369983	-0.743610829641231	0.262522924579211	-2.83255578853976	0.00461775074583546	0.0282845333095479	100038799	15.2150755	100038799	misshapen-like kinase 1	mink1	NA
ENSDARG00000035398	215.446026212405	-0.591646520967871	0.140507186225435	-4.21079189514628	2.54477085430399e-05	0.000542779910209381	559101	14.82921	559101	ectodermal-neural cortex 1	enc1	NA
ENSDARG00000035427	84.3638401772665	0.697463581602516	0.194908310345866	3.57841890048127	0.000345679096280732	0.00425167741263052	394040	14.854555	394040	surfeit 6	surf6	NA
ENSDARG00000035433	57.8491349837207	0.78313663483848	0.221910474627684	3.52906565655546	0.000417029651900683	0.00488146302683747	556104	14.835336	556104	actin related protein 2/3 complex, subunit 5-like, b	arpc5lb	NA
ENSDARG00000035434	43.6783537579077	0.66360017926471	0.234781007472505	2.82646448453639	0.0047064962821674	0.0286908061381532	445314	14.833097	445314	zinc finger, matrin-type 5	zmat5	NA
ENSDARG00000035514	23.3170805595486	-1.19763481709724	0.390569358294693	-3.06638191568934	0.00216666370876838	0.0164536446125733	ENSDARG00000035514	14.837396	NA	ADAM metallopeptidase domain 28	adam28	NA
ENSDARG00000035540	41.5415954443658	-0.651447815613177	0.186598942409838	-3.49116563684678	0.000480918003344855	0.00547586617530349	553209	14.823884	553209	bromodomain and WD repeat domain containing 3	brwd3	NA
ENSDARG00000035544	2575.09193382268	0.294977295136267	0.105995737692619	2.78291657341621	0.00538726567925098	0.0315755799245891	393421	14.833017	393421	ethanolamine-phosphate phospho-lyase	etnppl	NA
ENSDARG00000035569	666.840399534486	-0.612129728273774	0.168149490402729	-3.6403900291799	0.000272225359565158	0.003531060204638	492344	14.854625	492344	cytochrome P450, family 1, subfamily D, polypeptide 1	cyp1d1	NA
ENSDARG00000035573	47.009745505685	0.661490997942956	0.210324822792342	3.14509238215814	0.00166034390738287	0.0135000445892238	415208	15.207947	415208	zgc:86811	zgc:86811	NA
ENSDARG00000035663	170.22177080294	-1.64330652908465	0.339168978913125	-4.8450967843541	1.26549973322674e-06	4.69206473241091e-05	450015	14.833017	450015	zgc:103438	zgc:103438	NA
ENSDARG00000035682	32.1565803950154	-0.818250854953923	0.247717708663496	-3.30315849992562	0.000956023347512482	0.00908409635695193	562912	14.82419	562912	latent transforming growth factor beta binding protein 3	ltbp3	NA
ENSDARG00000035706	54.7100288264102	-0.478216685200975	0.15068849613591	-3.17354474604125	0.00150589687704041	0.0125646974279232	ENSDARG00000035706	14.883119	NA	dedicator of cytokinesis 6	dock6	NA
ENSDARG00000035835	537.56523389282	0.858787186726237	0.144340400577201	5.94973537063806	2.68576364032667e-09	2.90518093772836e-07	437013	14.546301	437013	eukaryotic elongation factor 2 kinase	eef2k	NA
ENSDARG00000035858	185.74519262095	1.13093210230376	0.250488648351679	4.5149036083901	6.33455715214127e-06	0.000173627058593194	406658	14.838266	406658	calponin 2	cnn2	NA
ENSDARG00000035869	4628.00326369541	1.03101512065962	0.176035910306081	5.8568454519703	4.7174174172357e-09	4.57212096078484e-07	317764	14.543792	317764	antizyme inhibitor 1b	azin1b	NA
ENSDARG00000035870	82.5122859466365	0.529256966557365	0.16587082158157	3.19077798922636	0.00141890266142447	0.0120293952016498	368911	14.880566	368911	lysosomal protein transmembrane 4 beta	laptm4b	NA
ENSDARG00000035875	231.304565955518	-0.279610427161052	0.0994045370490432	-2.81285377369748	0.00491039753397942	0.0295233082502038	557625	14.854555	557625	transmembrane protein 54b	tmem54b	NA
ENSDARG00000035890	74.929204683126	0.554533904012926	0.146472617548764	3.78592199206319	0.000153139713267794	0.00228483697812724	335494	14.542969	335494	alpha-L-fucosidase 1, tandem duplicate 1	fuca1.1	NA
ENSDARG00000035913	177.690298373633	0.805172170628557	0.293510648705047	2.74324687768888	0.00608349294511243	0.034287558116453	368235	15.209884	368235	tyrosyl-tRNA synthetase	yars	NA
ENSDARG00000035942	35.0194380965709	-1.23444272157095	0.445546281293352	-2.7706273700401	0.00559484135251358	0.0323848557026766	561773	14.839874	561773	histamine receptor H3	hrh3	NA
ENSDARG00000035986	182.058597537068	0.40282489137703	0.130938154205027	3.07645157992891	0.0020948032258902	0.0160864678220209	561613	14.82419	561613	protein tyrosine phosphatase, non-receptor type 2, b	ptpn2b	NA
ENSDARG00000036040	429.6387450665	0.281599458039509	0.105962746578052	2.65753264362662	0.00787149668639313	0.0415706984985409	393405	14.593083	393405	ATG13 autophagy related 13 homolog (S. cerevisiae)	atg13	NA
ENSDARG00000036064	80.7749463747947	0.685067229057408	0.153661470247831	4.45828891232465	8.26164999870276e-06	0.000216176867676639	550572	14.852479	550572	CTD nuclear envelope phosphatase 1 regulatory subunit 1	cnep1r1	NA
ENSDARG00000036076	110.619491886201	0.798526130488494	0.188809216225207	4.22927517233074	2.34445443022328e-05	0.000507133796428488	393863	14.833097	393863	HEAT repeat containing 3	heatr3	NA
ENSDARG00000036080	379.402420866496	-0.43887808052488	0.103977878817006	-4.22087934008804	2.43351174208014e-05	0.000521805216907981	58031	14.544127	58031	CD81 molecule a	cd81a	NA
ENSDARG00000036096	61.8967265835106	-0.488740631750393	0.166448655942239	-2.93628463975099	0.00332169375673348	0.0223444307955725	58092	14.372293	58092	SMAD family member 3a	smad3a	NA
ENSDARG00000036107	1311.6231028266	-0.677851007983468	0.224373962993261	-3.02107695091086	0.00251877339118292	0.0183824937555308	368359	15.22285	368359	thioredoxin interacting protein a	txnipa	NA
ENSDARG00000036116	41.2356885546797	-0.65403103603754	0.209146154046745	-3.12714828067727	0.00176510878136595	0.0141524109108196	567151	14.837396	567151	eukaryotic translation initiation factor 3, subunit H, b	eif3hb	NA
ENSDARG00000036147	189.213799276186	-1.00331456133977	0.200489848679856	-5.00431601872206	5.60607246891572e-07	2.46972974403323e-05	560102	14.834426	560102	anoctamin 5b	ano5b	NA
ENSDARG00000036161	1009.34059917327	0.355332155155384	0.120948685658882	2.93787529165506	0.00330469926454507	0.0222672033314591	321899	14.542969	321899	heterogeneous nuclear ribonucleoprotein A0, like	hnrnpa0l	NA
ENSDARG00000036164	136.59633310999	0.831357437380853	0.203145083859363	4.09243197810488	4.26872485434409e-05	0.0008368220325304	368284	14.825785	368284	cysteinyl-tRNA synthetase	cars	NA
ENSDARG00000036171	11732.0222619014	-0.358048624637234	0.122197935306301	-2.93007098474905	0.00338884580390956	0.0226282917328562	798787	14.543775	798787	ribonuclease like 3	rnasel3	NA
ENSDARG00000036190	41.8429245865658	0.808052199060703	0.19518544840803	4.13992029452672	3.47426514730207e-05	0.000701512037659409	449780	14.82921	449780	thioredoxin-like 4A	txnl4a	NA
ENSDARG00000036237	7040.55938872524	-0.588375540225819	0.186272577558961	-3.15868040232375	0.00158485186306747	0.013024492404288	449925	14.852479	449925	solute carrier family 27 (fatty acid transporter), member 2a	slc27a2a	NA
ENSDARG00000036272	43.335615262325	-1.02176404707976	0.20888000075218	-4.89163176656632	1.0000340946933e-06	3.84616287530453e-05	565237	14.823151	565237	glucagon receptor b	gcgrb	NA
ENSDARG00000036279	92.9786348749578	-0.491360044763859	0.15398823274795	-3.1908934598147	0.00141833571575836	0.0120293952016498	286832	14.842841	286832	laminin, gamma 1	lamc1	NA
ENSDARG00000036299	743.199552826772	0.589210748089889	0.114496770106937	5.1460905625511	2.65971057204074e-07	1.36535566018109e-05	373078	14.835336	373078	nucleobindin 2a	nucb2a	NA
ENSDARG00000036335	216.392227309761	0.433765279055555	0.109769885233616	3.95158725120647	7.76345568043134e-05	0.00135524878340671	324052	14.543775	324052	C1GALT1-specific chaperone 1	c1galt1c1	NA
ENSDARG00000036442	864.836298774272	-0.547043392564995	0.18757460301489	-2.91640437336588	0.00354091248470507	0.0233395836519053	368385	14.547653	368385	ATPase phospholipid transporting 11C	atp11c	NA
ENSDARG00000036463	38.9188100164584	-1.48962279893629	0.534149203049193	-2.78877660105598	0.00529075464788227	0.0311480027994093	573644	14.831473	573644	claudin 15a	cldn15a	NA
ENSDARG00000036510	270.243835850248	0.372627423937682	0.117846244255121	3.16197963111148	0.00156700524839961	0.0129144684247356	321464	14.546301	321464	cyclin T2b	ccnt2b	NA
ENSDARG00000036541	83.7338759379277	-0.61034430556307	0.234565692770304	-2.60201864285731	0.00926768141414662	0.0468019842986187	798402	14.829012	798402	rhomboid 5 homolog 1a (Drosophila)	rhbdf1a	NA
ENSDARG00000036587	323.799495253732	-0.569144808618192	0.105521892541467	-5.39361828062866	6.90528336796355e-08	4.26824020422849e-06	373866	14.815266	373866	carbonyl reductase 1	cbr1	NA
ENSDARG00000036592	38.7092285599746	0.512876232391859	0.189331674047459	2.70887708024649	0.00675113466485379	0.0371941775646674	564058	14.833489	564058	SET domain containing 4	setd4	NA
ENSDARG00000036636	155.492149976873	-0.659233206327329	0.177670266815164	-3.71043066543684	0.000206906960181375	0.00287463053050155	768138	14.835131	768138	emopamil binding protein-like	ebpl	NA
ENSDARG00000036787	47.9045859660769	-1.12005219889691	0.284755005267569	-3.93338897711193	8.37565338548166e-05	0.0014352339570737	368771	14.82419	368771	transporter associated with antigen processing, subunit type a	tap2a	NA
ENSDARG00000036811	244.038204545961	0.599610396972567	0.178829963895613	3.35296380936795	0.000799511600536695	0.00797865159843662	445227	14.823164	445227	interferon-related developmental regulator 2	ifrd2	NA
ENSDARG00000036834	556.529327498463	-0.918821675738618	0.33427497802474	-2.74870013055723	0.00598320965571319	0.033903921879778	30328	14.543792	30328	type I cytokeratin	cki	NA
ENSDARG00000036846	14.420856607821	-2.05780052460081	0.651239329530811	-3.15982225164958	0.0015786541578063	0.012983974963899	431735	14.852479	431735	ankyrin repeat and sterile alpha motif domain containing 4B	anks4b	NA
ENSDARG00000036848	272.622475327321	1.92896747377096	0.395982873678913	4.87134066140213	1.10843534216126e-06	4.20962199695413e-05	393221	14.823884	393221	solute carrier family 43 (amino acid system L transporter), member 2a	slc43a2a	NA
ENSDARG00000036864	176.558605725348	-1.13401027955828	0.176289356870711	-6.43266445398603	1.25386250105339e-10	1.97609787824339e-08	ENSDARG00000036864	14.823884	NA	solute carrier family 34 (type II sodium/phosphate cotransporter), member 2b	slc34a2b	NA
ENSDARG00000036929	137.808939988805	0.427448227481186	0.144275996169477	2.96271201606589	0.0030494172202973	0.0210026660738498	100144552	14.835131	100144552	ring finger protein 139	rnf139	NA
ENSDARG00000036965	33.2804051980009	-1.00473996450182	0.303552952867922	-3.30993309407531	0.00093318274352852	0.00891601651249844	492480	15.209884	492480	ring finger protein 24	rnf24	NA
ENSDARG00000036966	2227.18433705218	0.804686315344845	0.148624397764529	5.41422759283264	6.15538332911077e-08	3.92486679116721e-06	327462	14.829012	327462	hydroxy-delta-5-steroid dehydrogenase, 3 beta- and steroid delta-isomerase	hsd3b7	NA
ENSDARG00000037017	245.139132984151	0.37182262780829	0.091004302858416	4.08576975076409	4.39309275457241e-05	0.000854290830202965	170784	14.544415	170784	ubiquitination factor E4B, UFD2 homolog (S. cerevisiae)	ube4b	NA
ENSDARG00000037020	64.4843818458064	-0.815417366432941	0.209932342480407	-3.88419124370532	0.000102671071849286	0.00167410502752906	369190	15.207947	369190	kinesin family member 1B	kif1b	NA
ENSDARG00000037038	233.141315636477	0.36605391574844	0.124462728227762	2.94107256815531	0.00327077898533936	0.0221001045216879	321585	14.546301	321585	proteasome 26S subunit, ATPase 6	psmc6	NA
ENSDARG00000037099	80.8631311075605	-0.919830388573567	0.275475961759752	-3.33905863400078	0.000840628187558053	0.00823965250183318	393285	14.531645	393285	insulin receptor substrate 2a	irs2a	NA
ENSDARG00000037108	86.1107901105584	0.390560511910501	0.141683459443288	2.75657097479917	0.0058410934617513	0.0333011046066433	393485	15.22285	393485	prefoldin subunit 6	pfdn6	NA
ENSDARG00000037109	223.400705342956	0.803223086664274	0.119182687422639	6.73942754635103	1.59011862362391e-11	3.6347711556988e-09	266990	15.207947	266990	PWP2 periodic tryptophan protein homolog (yeast)	pwp2h	NA
ENSDARG00000037116	99.7952160173878	-0.667699649128581	0.249515048775959	-2.67598949403695	0.00745089807165415	0.0399505487756586	352944	14.815489	352944	chemokine (C-X-C motif) ligand 12a (stromal cell-derived factor 1)	cxcl12a	NA
ENSDARG00000037121	65.1752544587638	-1.94043128467038	0.455601387364092	-4.25905481960197	2.05293123392824e-05	0.000455517617198547	791612	14.544415	791612	methionine adenosyltransferase II, alpha b	mat2ab	NA
ENSDARG00000037158	31.1561406081955	1.14401762780454	0.348945043886696	3.27850372959017	0.00104358985191996	0.00966272908391982	406457	15.22285	406457	regulator of chromosome condensation 1	rcc1	NA
ENSDARG00000037182	36.4163209339102	0.654643625241206	0.226295240196164	2.89287403780003	0.00381734355351767	0.0245473020970629	ENSDARG00000037182	14.854555	NA	surfeit 2	surf2	NA
ENSDARG00000037267	25.1109565747992	-0.848417563154554	0.304561799083413	-2.78569921016979	0.00534124090430044	0.0313596990214328	791197	14.838869	791197	zgc:158263	zgc:158263	NA
ENSDARG00000037278	132.79136558718	0.992051454841031	0.285987190209075	3.46886674929663	0.000522658614387607	0.00582521537562636	553239	14.852479	553239	lecithin retinol acyltransferase a	lrata	NA
ENSDARG00000037284	347.316648304473	0.944289013216081	0.162576549515423	5.80827318595849	6.31204648615176e-09	5.97425337341629e-07	406449	14.546301	406449	prostaglandin E synthase 3a (cytosolic)	ptges3a	NA
ENSDARG00000037307	18.0371225058147	-2.12044336098549	0.536181154507168	-3.9547144526825	7.662611379648e-05	0.00134151064832999	550565	14.543775	550565	glucosamine-6-phosphate deaminase 1	gnpda1	NA
ENSDARG00000037421	171.665396543289	-1.668562427027	0.332428892207711	-5.01930628215201	5.18584108127092e-07	2.32690609998508e-05	30498	14.82419	30498	early growth response 1	egr1	NA
ENSDARG00000037425	144.281704548023	-1.98874536964114	0.6021752622729	-3.30260223931261	0.000957921604936288	0.00908920180352234	449788	14.833489	449788	S100 calcium binding protein A10a	s100a10a	NA
ENSDARG00000037476	59.531932150216	-1.03742943665671	0.317130763834592	-3.27129864070143	0.00107054794742596	0.00982552150232232	541478	14.595437	541478	sorbin and SH3 domain containing 3	sorbs3	NA
ENSDARG00000037514	104.257159807154	0.470422522619043	0.139162543791722	3.38038174498378	0.000723852162975667	0.00739415594810304	393965	14.835131	393965	histone deacetylase 3	hdac3	NA
ENSDARG00000037533	105.089427734427	-4.46222264981326	1.27605728224896	-3.49688271199621	0.000470728745001479	0.00537500353034206	100151009	14.839874	100151009	meprin A, beta	mep1b	NA
ENSDARG00000037559	610.539695292739	0.408440869580428	0.153143679122244	2.66704360193931	0.00765217435345598	0.0407339632069594	406335	14.82419	406335	ubiquitin-like modifier activating enzyme 1	uba1	NA
ENSDARG00000037570	29.0173780340048	1.0744853249141	0.297955664761912	3.60619196742808	0.000310723308387688	0.00391718301885207	445412	14.853864	445412	polymerase (RNA) I polypeptide D	polr1d	NA
ENSDARG00000037679	922.387857106752	-0.632839214091345	0.102512990875841	-6.17325871272072	6.68966111995865e-10	8.26992290492847e-08	ENSDARG00000037679	14.880765	NA	NA	NA	NA
ENSDARG00000037708	125.162929356972	0.385037290090386	0.125213469371309	3.07504689410524	0.00210469458542824	0.0161382119635843	394064	14.542969	394064	exosome component 10	exosc10	NA
ENSDARG00000037805	46.5377458041839	-0.995091229096836	0.32816126823153	-3.03232381584642	0.0024267871742554	0.0179490394481711	677742	14.880566	677742	lectin, galactoside-binding, soluble, 3 binding protein a	lgals3bpa	NA
ENSDARG00000037846	369.183449437815	0.411155494811149	0.156407844059489	2.62873960883169	0.00857019559955037	0.0442197272949543	259190	14.543538	259190	histocompatibility (minor) 13	hm13	NA
ENSDARG00000037867	639.75492836289	0.314541699468586	0.0906120676973981	3.47130031861769	0.00051794438331983	0.00578331447365875	402883	14.833816	402883	ATP synthase membrane subunit f	atp5mf	NA
ENSDARG00000037873	42.5086141959559	-1.73646740433337	0.45963171129531	-3.77795387406962	0.000158122155517526	0.0023248178569112	492759	14.825805	492759	cytochrome P450, family 3, subfamily c, polypeptide 3	cyp3c3	NA
ENSDARG00000037884	13.92507260354	-0.813027391971322	0.303966562298585	-2.67472641011313	0.00747902565022797	0.0400567620479717	437023	14.833097	437023	RAB30, member RAS oncogene family	rab30	NA
ENSDARG00000037894	104.142002965149	-1.25067522215299	0.196966392155232	-6.34968843399089	2.15751443722735e-10	3.14919125385654e-08	664754	14.544415	664754	enhancer of zeste 1 polycomb repressive complex 2 subunit	ezh1	NA
ENSDARG00000037909	108.738327129689	0.5343347114572	0.173946753359648	3.07182917264585	0.00212751442662041	0.0162310058428881	553583	14.838869	553583	translocase of inner mitochondrial membrane 29	timm29	NA
ENSDARG00000037917	23.4352678384269	-0.852941640103915	0.325571748098494	-2.61982695085041	0.00879743965078944	0.0450850174997099	407685	14.833017	407685	integrin, alpha 3a	itga3a	NA
ENSDARG00000037960	514.429948754152	-0.367639612287611	0.134376339543521	-2.73589542278417	0.00622107930215882	0.0348766199655965	321202	14.543792	321202	leucine rich repeat containing 17	lrrc17	NA
ENSDARG00000037961	119.83221114102	1.25342957056518	0.335242745323525	3.73887157306137	0.000184848123565091	0.00260947670139125	415248	14.543775	415248	reticulocalbin 3, EF-hand calcium binding domain	rcn3	NA
ENSDARG00000037963	50.0662289591068	-0.944732973377195	0.220100192260133	-4.29228599791785	1.76842962004496e-05	0.000409646746593589	497165	14.853864	497165	NIMA-related kinase 6	nek6	NA
ENSDARG00000037998	186.978041848482	-0.32240533626923	0.111372197573573	-2.894845781024	0.0037934485215467	0.024458557125353	245697	14.837396	245697	flotillin 1b	flot1b	NA
ENSDARG00000038027	69.1658967147698	0.620153218793637	0.164147248791049	3.77802992959731	0.00015807388522908	0.0023248178569112	393260	14.852479	393260	nucleolar protein 12	nol12	NA
ENSDARG00000038040	27.0112137907452	0.791058357088824	0.248072672221986	3.18881701077075	0.00142856277022937	0.0120774863651981	450054	14.854625	450054	thiamin pyrophosphokinase 1	tpk1	NA
ENSDARG00000038068	3129.93952492658	0.860326968596969	0.151624127132531	5.6740769748668	1.39438427095852e-08	1.10411538840931e-06	322206	14.835336	322206	DEAD (Asp-Glu-Ala-Asp) box helicase 5	ddx5	NA
ENSDARG00000038106	1320.91949134197	0.676911076695412	0.152270015512222	4.44546534272259	8.77018193605218e-06	0.000226547450224461	406465	14.880566	406465	solute carrier family 37 (glucose-6-phosphate transporter), member 4a	slc37a4a	NA
ENSDARG00000038151	26.2843833591738	-1.00300021658336	0.299759572472048	-3.34601563617084	0.000819817725372221	0.00808802259192546	436988	14.879544	436988	zgc:92360	zgc:92360	NA
ENSDARG00000038207	1700.95179959963	-0.340092839172616	0.116677199308542	-2.91481832944302	0.00355895647629111	0.0234202920751042	394133	14.82921	394133	aldehyde dehydrogenase 4 family, member A1	aldh4a1	NA
ENSDARG00000038225	144.33776520092	0.715308230018653	0.155501200528163	4.60001741201415	4.22455627382873e-06	0.000126060342998608	30380	14.839825	30380	NRAS proto-oncogene, GTPase	nras	NA
ENSDARG00000038239	647.817656009142	0.453857922683645	0.136242484858408	3.33125106427209	0.0008645658833374	0.00840627261366982	445499	14.322271	445499	transportin 2 (importin 3, karyopherin beta 2b)	tnpo2	NA
ENSDARG00000038239	647.817656009142	0.453857922683645	0.136242484858408	3.33125106427209	0.0008645658833374	0.00840627261366982	100005536	14.322271	100005536	transportin-2	LOC100005536	NA
ENSDARG00000038293	183.316746390802	0.620225133854864	0.152327556228938	4.07165419842163	4.66804444856152e-05	0.000901967440100842	494056	14.833489	494056	zgc:103559	zgc:103559	NA
ENSDARG00000038397	37.5106642083247	0.869424669687259	0.234195238497966	3.71239259714843	0.000205309192618515	0.00285570708217371	554138	14.82419	554138	RNA polymerase II associated protein 2	rpap2	NA
ENSDARG00000038405	26002.7595191451	0.473544066046538	0.15761260238057	3.00448097990998	0.00266034391885799	0.0190823366352662	100007703	15.2045145	100007703	uncharacterized LOC100007703	LOC100007703	NA
ENSDARG00000038424	10848.462959487	-0.451282006940009	0.156151487952811	-2.89002694022607	0.00385208813139003	0.0247182456100584	794635	14.834426	794635	si:dkey-8k3.2	si:dkey-8k3.2	NA
ENSDARG00000038473	103.271126847459	0.444042344442132	0.165588201273309	2.68160618345763	0.00732696576118481	0.0394867394113674	321832	14.531645	321832	ubiquitin-conjugating enzyme E2D 3	ube2d3	NA
ENSDARG00000038476	40.238585930806	0.513126594853859	0.178447695018575	2.87550138879882	0.0040338637104557	0.0255597588138969	ENSDARG00000038476	14.853864	NA	si:dkeyp-68b7.7	si:dkeyp-68b7.7	NA
ENSDARG00000038537	183.659762517718	0.339382764130015	0.121801565251614	2.78635798668865	0.00533039686615405	0.0313332159308376	798361	14.834426	798361	golgi-associated, gamma adaptin ear containing, ARF binding protein 1	gga1	NA
ENSDARG00000038559	494.844968936347	0.793734735928913	0.248247159351327	3.19735677138442	0.00138693269375923	0.0118328799893613	321618	14.546301	321618	H1 histone family, member 0	h1f0	NA
ENSDARG00000038576	201.893283779215	0.523457370746321	0.148881872541742	3.5159241471762	0.000438226165651212	0.00508048803527697	324015	14.825785	324015	ubiquitin-conjugating enzyme E2D 1b	ube2d1b	NA
ENSDARG00000038635	62.0956121925275	0.543286196859269	0.165366002336233	3.28535605374691	0.00101853571342166	0.00951392457062713	100005893	14.593083	100005893	mago homolog, exon junction complex core component	magoh	NA
ENSDARG00000038682	43.5446993614988	-3.93343710257957	1.10743668663744	-3.55183926091779	0.000382548476710032	0.0045750444101437	100126131	14.854625	100126131	zgc:171687	zgc:171687	NA
ENSDARG00000038731	1820.29381855043	0.717288571004734	0.225792134037853	3.17676509884301	0.0014892760860802	0.012451745881892	436940	15.2045145	436940	solute carrier family 25 (pyrimidine nucleotide carrier ), member 36a	slc25a36a	NA
ENSDARG00000038743	695.621081246497	0.432592900970842	0.0949157771065817	4.55765009946744	5.17291206195662e-06	0.000148230962397259	114454	14.593284	114454	coatomer protein complex, subunit beta 2	copb2	NA
ENSDARG00000038785	189.640405170636	1.48169935329028	0.420309793159486	3.52525536498277	0.000423074739210986	0.00493226987250489	336770	14.543775	336770	ATP-binding cassette, sub-family F (GCN20), member 2a	abcf2a	NA
ENSDARG00000038789	37.1799963854829	0.510147579419969	0.192838633379326	2.6454635696182	0.00815790708293261	0.0426717741000844	436910	14.839874	436910	transmembrane protein 53	tmem53	NA
ENSDARG00000038954	69.8518417270051	-0.48180373426009	0.163455858597618	-2.9476076195357	0.00320243261290225	0.0217596584998938	58117	14.838869	58117	catenin, beta interacting protein 1	ctnnbip1	NA
ENSDARG00000038957	56.4876790057272	-1.14360172697255	0.292865569916722	-3.90486914285532	9.42763844643842e-05	0.00156889889805771	565210	14.8804035	565210	feline leukemia virus subgroup C cellular receptor family, member 2a	flvcr2a	NA
ENSDARG00000038967	238.456013020536	0.357090874857251	0.109510092483035	3.26080333566123	0.00111097065855238	0.01005934942329	324655	14.815489	324655	cullin 3a	cul3a	NA
ENSDARG00000038980	217.859571470051	0.441435616837717	0.156459495744815	2.82140508465972	0.00478137842181887	0.0289921919821499	324900	14.833489	324900	thioredoxin domain containing 12 (endoplasmic reticulum)	txndc12	NA
ENSDARG00000039062	14.9371673159309	1.31609271727779	0.392999740222181	3.34883864435571	0.000811510413013649	0.00803108531318199	550131	14.825805	550131	MORN repeat containing 4	morn4	NA
ENSDARG00000039082	356.717293350022	0.808275519141768	0.313966865203521	2.57439751999888	0.0100414828782777	0.0496338494779004	641500	14.833097	641500	zgc:123010	zgc:123010	NA
ENSDARG00000039117	443.53322512595	-1.42189427683485	0.218109873575639	-6.51916510483763	7.06998000319115e-11	1.22512415765228e-08	30674	14.829012	30674	thyrotrophic embryonic factor a	tefa	NA
ENSDARG00000039150	911.252114330358	-0.27798839406569	0.09921397861537	-2.80190753304418	0.00508014320988	0.0303181945752198	406625	14.543775	406625	legumain	lgmn	NA
ENSDARG00000039241	13.7787021667816	-1.85102924796148	0.392148276707669	-4.72022792883863	2.35580516392886e-06	7.8193368660269e-05	497384	14.879544	497384	protein kinase C, alpha	prkca	NA
ENSDARG00000039255	194.315235346434	0.684745867921797	0.231657874900076	2.95584973408375	0.00311808963151888	0.0213414907689194	404613	14.531645	404613	kelch-like family member 21	klhl21	NA
ENSDARG00000039269	701.221476647501	-1.60922224107585	0.571985881749567	-2.81339503722298	0.00490213872372769	0.0294882873078257	322614	14.546301	322614	arginase 2	arg2	NA
ENSDARG00000039272	15.8071385449631	-3.2835588024501	0.78626574610633	-4.17614377672006	2.96492459708356e-05	0.000616124553922252	334273	14.854555	334273	plastin 1 (I isoform)	pls1	NA
ENSDARG00000039279	449.761833675315	0.363641410351471	0.104965281571141	3.46439703593813	0.000531421533129317	0.00589036767965386	406720	14.543792	406720	golgin A5	golga5	NA
ENSDARG00000039328	177.874757443436	0.45568014477249	0.125739976505815	3.62398783135938	0.000290095259412275	0.00371905192357641	553373	14.593083	553373	cyclin D-type binding-protein 1	ccndbp1	NA
ENSDARG00000039338	102.593730652396	0.334113437138791	0.129823901391129	2.57358955907653	0.0100649594065123	0.0496688322647237	402803	14.819327	402803	growth arrest and DNA-damage-inducible, gamma interacting protein 1	gadd45gip1	NA
ENSDARG00000039345	192.91607635745	0.735627147233582	0.153624586635209	4.7884727526094	1.68055375837703e-06	5.93583346435503e-05	336823	14.531645	336823	developmentally regulated GTP binding protein 1	drg1	NA
ENSDARG00000039363	175.798540654533	0.365333883257097	0.140685022743164	2.59682143936569	0.00940908227214632	0.0472067376364449	324005	14.823151	324005	DnaJ (Hsp40) homolog, subfamily B, member 12a	dnajb12a	NA
ENSDARG00000039392	276.801872022528	-0.815827122835327	0.147509103322313	-5.53069000123141	3.18973590213862e-08	2.24672386362846e-06	561159	14.815489	561159	WNK lysine deficient protein kinase 1b	wnk1b	NA
ENSDARG00000039466	175.004373018992	0.303280215761934	0.114043602212566	2.65933563898349	0.00782949213095097	0.04138627954363	678601	14.842841	678601	heterogeneous nuclear ribonucleoprotein H3 (2H9)	hnrnph3	NA
ENSDARG00000039577	11.4542642361165	-1.41308875923495	0.506367615056906	-2.79063810010074	0.005260425371725	0.0310626927707883	245950	14.544127	245950	protein tyrosine kinase 2 beta, b	ptk2bb	NA
ENSDARG00000039578	596.366915429344	0.553953130089213	0.100774332851879	5.4969664835532	3.86380100574242e-08	2.61508096003181e-06	368737	14.542969	368737	proliferation-associated 2G4, a	pa2g4a	NA
ENSDARG00000039677	180.909765457181	-0.591801653365832	0.122160822501715	-4.84444719056737	1.2696468101915e-06	4.69206473241091e-05	560091	14.833097	560091	desmocollin 2 like	dsc2l	NA
ENSDARG00000039719	84.5380342299644	0.709495502551578	0.166248728663783	4.26767475609658	1.97521024496546e-05	0.000442322959662782	436691	14.833489	436691	mitochondrial ribosomal protein S26	mrps26	NA
ENSDARG00000039729	20.4212444648639	-1.34586899647465	0.264659493976251	-5.08528515737062	3.67074138165661e-07	1.75774829402252e-05	565859	14.832098	565859	ArfGAP with SH3 domain, ankyrin repeat and PH domain 1b	asap1b	NA
ENSDARG00000039747	49.5878732025244	-1.82948125342306	0.433634125837666	-4.21895128730699	2.45441290208741e-05	0.000525357107929134	ENSDARG00000039747	14.823884	NA	NA	BX914200.1	NA
ENSDARG00000039757	473.485291435929	0.452793773321924	0.166414670011244	2.72087655067508	0.00651090711416763	0.0361335958259921	449676	14.8207245	449676	multiple coagulation factor deficiency 2	mcfd2	NA
ENSDARG00000039871	15.301567000381	-0.837389756973804	0.290578552390778	-2.88180166803109	0.00395408532398018	0.025212496684221	550609	14.543792	550609	rapunzel 4	rpz4	NA
ENSDARG00000039987	56.1302275400211	-0.635720674493067	0.231001727609597	-2.75201697005255	0.00592294515446016	0.0336253423365908	562048	14.547653	562048	human immunodeficiency virus type I enhancer binding protein 2a	hivep2a	NA
ENSDARG00000039997	20.7010427625099	-1.23146850815525	0.361876530231952	-3.40300739416814	0.00066648476814225	0.00698482955540083	406460	14.854625	406460	protein tyrosine phosphatase type IVA, member 3	ptp4a3	NA
ENSDARG00000040027	148.805690650107	2.03623915703265	0.355264636668781	5.73161228802818	9.94804579558585e-09	8.60861248668018e-07	100319820	14.833489	100319820	oxysterol binding protein-like 10b	osbpl10b	NA
ENSDARG00000040133	116.44658061504	0.495544699913951	0.176217073086116	2.81212649396226	0.00492151446881953	0.0295461584686564	641390	14.833816	641390	atypical chemokine receptor 4b	ackr4b	NA
ENSDARG00000040157	172.1583324883	0.609575804841031	0.130801321108485	4.66031841020517	3.15720593868949e-06	9.88360463752536e-05	492466	14.593083	492466	glycosyltransferase 8 domain containing 1	glt8d1	NA
ENSDARG00000040186	94.3852883093309	0.796189516960845	0.249879273074583	3.18629675508622	0.00144106700374529	0.0121408391866302	503762	14.82921	503762	family with sequence similarity 210, member Ab	fam210ab	NA
ENSDARG00000040190	2271.21993089714	-0.525681986482584	0.174761093937144	-3.00800352435224	0.00262970088292416	0.0189482546653537	566323	14.837396	566323	quinoid dihydropteridine reductase a	qdpra	NA
ENSDARG00000040280	77.0582932422632	0.538281417516159	0.139949848045327	3.84624510161541	0.000119941784321678	0.00188713599617808	550535	14.837396	550535	zgc:110182	zgc:110182	NA
ENSDARG00000040295	15703.6707521482	-0.614953457045317	0.207755510835264	-2.95998625775532	0.00307652765355249	0.0211173555369906	30314	14.815266	30314	apolipoprotein Eb	apoeb	NA
ENSDARG00000040298	22041.599792948	0.501480148620104	0.144667352516168	3.46643620622048	0.000527406873152011	0.00587273370242336	322543	14.854625	322543	apolipoprotein A-IV b, tandem duplicate 1	apoa4b.1	NA
ENSDARG00000040300	123.061594605493	0.463094385311118	0.163698327245511	2.82895001496613	0.00467009923420576	0.0285028978450392	436727	14.833816	436727	GTP-binding protein 10 (putative)	gtpbp10	NA
ENSDARG00000040309	206.355278391743	-0.4081145572116	0.145136455257194	-2.81193692162584	0.00492441594074603	0.0295489346815939	566349	14.8207245	566349	PX domain containing 1b	pxdc1b	NA
ENSDARG00000040310	184.204311045963	0.370226665335947	0.121989777020709	3.03489910693989	0.00240616164655288	0.017829142720482	406758	14.853864	406758	pre-mRNA processing factor 4Bb	prpf4bb	NA
ENSDARG00000040338	743.528368196837	0.779808443464805	0.114364737350777	6.81860914062165	9.19261261534915e-12	2.32017712156156e-09	436618	15.2150755	436618	hydrogen voltage-gated channel 1	hvcn1	NA
ENSDARG00000040350	31.4988756927093	0.863672049303928	0.309061766560581	2.79449657884045	0.00519805907781375	0.0308063563071833	436798	14.880566	436798	ribonuclease P/MRP 38 subunit	rpp38	NA
ENSDARG00000040433	5697.39536599778	0.857386018814771	0.186920474825144	4.58690263662564	4.4987034869096e-06	0.000132607768233357	393204	14.833489	393204	cytochrome P450, family 2, subfamily K, polypeptide 22	cyp2k22	NA
ENSDARG00000040443	26.9606826491733	0.605662202965162	0.230252176418119	2.63042987209524	0.00852769615651291	0.044019190002622	449992	14.852479	449992	polymerase (RNA) II (DNA directed) polypeptide I	polr2i	NA
ENSDARG00000040445	71.8844542023272	-0.914521365494895	0.242477543060381	-3.7715713956536	0.000162222727317943	0.00236217348732798	791754	15.22285	791754	si:ch211-219a4.3	si:ch211-219a4.3	NA
ENSDARG00000040466	137.731179708594	-3.69112771234158	0.968452236741349	-3.81136784273585	0.00013819993568361	0.00210577933158097	393207	14.544415	393207	villin 1	vil1	NA
ENSDARG00000040556	52.1329786066661	0.517589728379984	0.18858390818983	2.74461237625309	0.00605824084954202	0.0341692681062391	414930	14.852479	414930	intraflagellar transport 20 homolog (Chlamydomonas)	ift20	NA
ENSDARG00000040584	48.0857866630347	0.812415814262458	0.225251716778772	3.60670198602909	0.000310113477700834	0.00391356748161	404619	14.823151	404619	EEF1A lysine methyltransferase 1	eef1akmt1	NA
ENSDARG00000040640	12.8425067690399	-3.0737177498207	0.566785988968319	-5.42306586550521	5.85853926282046e-08	3.77532995580159e-06	101883645	14.837396	101883645	uncharacterized LOC101883645	LOC101883645	NA
ENSDARG00000040644	58.4977876840943	0.507145430305182	0.146318785778739	3.4660308832256	0.000528202603823293	0.00587619333821781	436703	14.853864	436703	2-phosphoxylose phosphatase 1	pxylp1	NA
ENSDARG00000040650	165.594828697165	0.354152995989484	0.100326659785777	3.52999887313793	0.000415561436913829	0.00486898143927567	777711	15.207947	777711	G protein pathway suppressor 1	gps1	NA
ENSDARG00000040666	179.735547964364	1.25952047061711	0.27248187959108	4.62240084554357	3.79324136713649e-06	0.00011546512352477	317644	14.834426	317644	nucleolar protein interacting with the FHA domain of MKI67	nifk	NA
ENSDARG00000040727	46.6499771562772	0.758923729870255	0.227792071581839	3.33165120541782	0.000863323858809568	0.00840093859395817	767802	14.835131	767802	transcription factor B1, mitochondrial	tfb1m	NA
ENSDARG00000040730	100.35251866306	1.06148143177704	0.306578407851417	3.46234896063355	0.000535482373993896	0.00592995334637664	368478	14.838869	368478	WD repeat domain 75	wdr75	NA
ENSDARG00000040747	810.202319156303	-0.624167631445133	0.225275993553572	-2.77067974087839	0.005593941659796	0.0323848557026766	445095	14.854555	445095	transmembrane 4 L six family member 4	tm4sf4	NA
ENSDARG00000040838	73.2115279013832	0.930837145530515	0.173571492979425	5.36284576201031	8.19209537380399e-08	4.88902637702637e-06	192303	14.837396	192303	DCN1, defective in cullin neddylation 1, domain containing 2a	dcun1d2a	NA
ENSDARG00000040864	150.762605387534	0.686377933489818	0.195777383829582	3.50591023367278	0.000455048660473064	0.00524041304337564	796378	14.879544	796378	si:dkey-286j15.1	si:dkey-286j15.1	NA
ENSDARG00000040869	104.28821234677	-1.46790706843531	0.252984325070293	-5.80236371572605	6.53865345399475e-09	6.14075865078654e-07	503707	15.2045145	503707	uridine phosphorylase 1	upp1	NA
ENSDARG00000040874	176.684029202664	-1.27741753956547	0.205208067214286	-6.22498694572053	4.81596107962608e-10	6.34188787822499e-08	556762	14.853864	556762	adducin 3 (gamma) a	add3a	NA
ENSDARG00000040898	27.1922136122765	-0.850588565326532	0.313220736476469	-2.71562022008857	0.00661517540689668	0.0365949087007093	101885644	14.834426	101885644	glycoprotein A33 (transmembrane)	gpa33	NA
ENSDARG00000040990	47.3734035744889	0.832965187944272	0.219438435307504	3.79589467440842	0.000147111950482518	0.00221674288569118	768201	14.839874	768201	ubiquitin specific peptidase 37	usp37	NA
ENSDARG00000041022	109.606739682943	-0.689751593009914	0.172471136798648	-3.99922912211778	6.35491356109067e-05	0.0011577410194378	321061	14.82921	321061	programmed cell death 4b	pdcd4b	NA
ENSDARG00000041060	60.2972311550978	-0.975636768070003	0.304311518159226	-3.20604613973079	0.00134572408546327	0.0115791529086559	327284	14.544127	327284	lectin, galactoside-binding, soluble, 9 (galectin 9)-like 3	lgals9l3	NA
ENSDARG00000041078	481.408595150693	-0.892778543659197	0.157476019033163	-5.6692984058175	1.43383448831923e-08	1.11793566488569e-06	558499	14.842841	558499	choline kinase alpha	chka	NA
ENSDARG00000041083	52.9458732390758	-1.93021267664339	0.450586322193475	-4.28378000301258	1.83744602432796e-05	0.000420012426127043	558452	14.544415	558452	alanyl (membrane) aminopeptidase a	anpepa	NA
ENSDARG00000041140	114.741604588043	-0.829727110322706	0.235267711884387	-3.52673600502581	0.000420716025008445	0.00491038019554654	100004133	14.838869	100004133	damage-specific DNA binding protein 2	ddb2	NA
ENSDARG00000041170	66.8743972011612	0.5668389643686	0.157841717393236	3.59118599144748	0.00032917661147203	0.00411555691226382	436696	14.543792	436696	alpha and gamma adaptin binding protein	aagab	NA
ENSDARG00000041317	417.483233991392	0.50701962700947	0.138100154146823	3.67139073914737	0.000241234203742355	0.00322450976639795	767677	14.595437	767677	RAN GTPase activating protein 1a	rangap1a	NA
ENSDARG00000041450	610.666958924432	0.352835135939561	0.090339149775421	3.90567253307888	9.39636874540284e-05	0.00156584604333639	492487	14.835131	492487	RAB11a, member RAS oncogene family	rab11a	NA
ENSDARG00000041493	129.007309796459	0.836000880877564	0.142499235670257	5.86670431560818	4.44542393493627e-09	4.38182953100029e-07	553305	14.838266	553305	importin 4	ipo4	NA
ENSDARG00000041505	2605.46178925597	0.310144567485536	0.0934963823996394	3.31718254252725	0.00090930185580637	0.00873607611664883	406248	15.207947	406248	integral membrane protein 2Bb	itm2bb	NA
ENSDARG00000041572	98.6664479775128	-0.566963072395868	0.15404644950368	-3.68046828876977	0.000232806011705677	0.00315400317069071	407655	14.833816	407655	zinc finger protein, FOG family member 1	zfpm1	NA
ENSDARG00000041599	22.0266251779455	1.33655914890397	0.407336159985356	3.28121900337063	0.00103359455753858	0.00960275925197846	431740	14.880566	431740	zgc:91860	zgc:91860	NA
ENSDARG00000041623	2523.43870793819	1.14160655695658	0.36992306203494	3.08606484461019	0.00202824584602347	0.0157019536389063	100174951	14.838266	100174951	metallothionein 2	mt2	NA
ENSDARG00000041623	2523.43870793819	1.14160655695658	0.36992306203494	3.08606484461019	0.00202824584602347	0.0157019536389063	30282	15.244334	30282	metallothionein-1	mt	NA
ENSDARG00000041645	1751.64593760439	-0.946999659502563	0.296576998854299	-3.19309880119125	0.00140754777993824	0.0119750290406965	100006972	9.270931	100006972	alpha-2-macroglobulin-like	a2ml	NA
ENSDARG00000041691	77.8581228767106	-1.75025772642159	0.39879402330325	-4.38887652308336	1.13937733969396e-05	0.000282727640213186	563771	14.82921	563771	basic helix-loop-helix family, member e41	bhlhe41	NA
ENSDARG00000041797	2909.28237285683	0.356188093780482	0.134069011072798	2.65675185436458	0.00788974936090886	0.0415989206637453	492358	14.838266	492358	connexin 28.9	cx28.9	NA
ENSDARG00000041799	62.2543234768408	-0.501689575237198	0.187482643973552	-2.67592543290552	0.00745232235999803	0.0399505487756586	30236	14.8207245	30236	connexin 43	cx43	NA
ENSDARG00000041869	27.4459742013845	-0.775229985107279	0.233049060706954	-3.32646689394766	0.000879544671955103	0.00852454696058886	559725	14.531645	559725	tumor necrosis factor receptor superfamily, member 19	tnfrsf19	NA
ENSDARG00000041896	71.9517987449863	0.653315401086566	0.218852495131031	2.98518598426494	0.00283405952522817	0.0199736074160205	322863	14.839874	322863	DnaJ (Hsp40) homolog, subfamily C, member 5 gamma a	dnajc5ga	NA
ENSDARG00000041904	63.6313133206649	0.890033444522098	0.230439500036499	3.86233021847873	0.000112310615419935	0.00178782307880657	553307	15.22285	553307	ankyrin repeat and zinc finger domain containing 1	ankzf1	NA
ENSDARG00000041951	400.575558043112	-0.75673436512477	0.127403322169181	-5.93967529449421	2.85587159672168e-09	3.03498985914765e-07	558648	14.823884	558648	selenoprotein O1	selenoo1	NA
ENSDARG00000041960	30.7076150196867	-5.010799305693	1.47964606675069	-3.38648506442944	0.000707941299162469	0.00727814998609634	569381	14.838266	569381	si:ch211-173a9.6	si:ch211-173a9.6	NA
ENSDARG00000041991	47.8480641174907	0.988096801331847	0.249603620098269	3.95866374431122	7.53702603635988e-05	0.00132334884681884	402808	14.833017	402808	ribosomal RNA processing 9, small subunit (SSU) processome component, homolog (yeast)	rrp9	NA
ENSDARG00000042005	55.5299296448581	0.478865266262185	0.159566656663515	3.00103590734491	0.00269062834899043	0.0191972688150878	541509	14.544127	541509	elongator acetyltransferase complex subunit 3	elp3	NA
ENSDARG00000042025	32.5586236411032	0.648358194675778	0.205673993454194	3.15235866133058	0.00161957206576269	0.0132313652380548	553393	14.838266	553393	si:dkeyp-118h3.6	si:dkeyp-118h3.6	NA
ENSDARG00000042145	292.666731623079	0.452591976865569	0.151896401489817	2.97960960514204	0.00288615955474646	0.0202125196797047	799481	14.880765	799481	LIM/homeobox protein Lhx8-like	LOC799481	NA
ENSDARG00000042151	67.0898332866474	-0.537299769272666	0.172452554233604	-3.11563822096158	0.00183547305698014	0.0145335142711115	30101	14.854625	30101	v-ski avian sarcoma viral oncogene homolog a	skia	NA
ENSDARG00000042186	59.4766612959502	-0.638062785380553	0.202904047194501	-3.14465282582026	0.00166284034001702	0.013511274794974	553586	14.827688	553586	papilin b, proteoglycan-like sulfated glycoprotein	paplnb	NA
ENSDARG00000042188	401.200593886415	-0.586449448663271	0.197733900189878	-2.96585182459923	0.00301845879159963	0.0208453792882524	ENSDARG00000042188	14.833097	NA	tetratricopeptide repeat domain 38	ttc38	NA
ENSDARG00000042252	327.173526635279	0.405097265833811	0.109962896101746	3.68394504141637	0.000229651776687866	0.00312394970824256	402996	15.2150755	402996	eukaryotic translation initiation factor 4h	eif4h	NA
ENSDARG00000042329	164.094442405705	-0.601270068397642	0.200044299787717	-3.00568458604268	0.00264983709112778	0.0190520927946665	560226	14.543538	560226	si:dkey-91m11.5	si:dkey-91m11.5	NA
ENSDARG00000042409	407.572395127325	-0.324656944841585	0.117768312300778	-2.75674278164416	0.00583802553829258	0.033299284084941	799483	14.838266	799483	si:ch211-251j10.3	si:ch211-251j10.3	NA
ENSDARG00000042520	132.092223823786	1.23523483880121	0.239392453765727	5.15987375278764	2.4711642434727e-07	1.31199400198748e-05	553498	14.82419	553498	si:dkey-251i10.3	si:dkey-251i10.3	NA
ENSDARG00000042521	76.7954437099156	-0.804230464011251	0.159061003005493	-5.05611337043736	4.27887028681678e-07	1.97104614162682e-05	100038774	14.815266	100038774	si:dkey-251i10.1	si:dkey-251i10.1	NA
ENSDARG00000042525	18.9222949088363	-0.832051968997801	0.253382765406884	-3.28377491524211	0.00102426691320569	0.00954129819110313	30692	14.593284	30692	early B-cell factor 2	ebf2	NA
ENSDARG00000042590	106.036866198895	0.443880765943511	0.160956761568924	2.75776402070213	0.00581981942001131	0.0332580718270929	387255	14.595437	387255	RNA binding motif protein 19	rbm19	NA
ENSDARG00000042613	8482.57459362614	0.512557083753143	0.135798808592203	3.77438571859881	0.000160402418050483	0.00234695083898745	100141350	14.829012	100141350	C-reactive protein 3	crp3	NA
ENSDARG00000042627	99.0839915557002	-0.886508134197229	0.326700755774044	-2.71351724331598	0.00665731034381705	0.036798666056611	447799	14.833017	447799	NHS-like 1b	nhsl1b	NA
ENSDARG00000042684	20723.6493114943	0.232648530866828	0.0834810444507498	2.78684259878996	0.00532243242404874	0.0313015868045391	321545	14.815266	321545	serpin peptidase inhibitor, clade C (antithrombin), member 1	serpinc1	NA
ENSDARG00000042707	142.565288608294	-0.42684631439076	0.140819003585347	-3.03116982454757	0.00243608189538053	0.0179983655751042	404725	14.543538	404725	connexin 30.3	cx30.3	NA
ENSDARG00000042708	955.094943348025	0.70878093498142	0.240427177829754	2.94800671612635	0.00319830116214411	0.0217437814699079	337223	15.2150755	337223	tubulin, alpha 8 like	tuba8l	NA
ENSDARG00000042717	176.655920761356	0.351587507781797	0.125980336524939	2.79081257821691	0.00525759067764904	0.0310626927707883	406821	14.823884	406821	adiponectin receptor 1b	adipor1b	NA
ENSDARG00000042724	280.500093535495	0.232712293584236	0.0854795085946157	2.72243368510537	0.00648030379380289	0.0359967356542513	64275	14.8207245	64275	SPT5 homolog, DSIF elongation factor subunit	supt5h	NA
ENSDARG00000042728	82.2167895985175	0.448029089237435	0.143044229556815	3.13210180253712	0.00173559683102306	0.013979789089901	324855	14.833017	324855	phospholipase A2-activating protein	plaa	NA
ENSDARG00000042742	121.114068717976	0.618542705977635	0.183657856635302	3.36790768067115	0.000757409536505206	0.00767867492448584	550577	14.543775	550577	syntaxin 6	stx6	NA
ENSDARG00000042807	216.196856430853	2.37249198893622	0.339266512831588	6.99300372776233	2.69062358623297e-12	7.24375661049164e-10	567144	14.839874	567144	solute carrier family 16, member 4	slc16a4	NA
ENSDARG00000042824	1465.61507026744	-0.946164077359302	0.142149863797301	-6.6561025954164	2.81184011612166e-11	5.87335224255413e-09	360149	14.854555	360149	nuclear factor, erythroid 2-like 2a	nfe2l2a	NA
ENSDARG00000042864	167.481037440401	0.856149345878133	0.238858646584193	3.5843347440904	0.000337938449022838	0.00417411720999326	322251	14.825805	322251	ribosomal protein L7-like 1	rpl7l1	NA
ENSDARG00000042892	113.187831171825	0.366272060648088	0.125225036578804	2.92491078984508	0.00344554983076513	0.0228978805264506	445110	14.833097	445110	poly(A) binding protein interacting protein 1	paip1	NA
ENSDARG00000042978	2046.6609788896	-0.354094104702358	0.120766458390615	-2.93205671029163	0.00336725252954052	0.0225382676217588	393108	15.209884	393108	cytochrome P450, family 2, subfamily P, polypeptide 6	cyp2p6	NA
ENSDARG00000042980	393.238399790327	-0.355603699411469	0.122735818931684	-2.89730986851852	0.00376377800138132	0.0242931116072108	100034406	14.842841	100034406	cytochrome P450, family 2, subfamily P, polypeptide 7	cyp2p7	NA
ENSDARG00000043102	133.784345524109	-0.440491847281509	0.166692170259405	-2.64254671707747	0.00822851127983672	0.0428767372710632	494053	14.546301	494053	latexin	lxn	NA
ENSDARG00000043179	46.6432615836064	0.739761034121273	0.256173125810827	2.88773864073297	0.00388022139410299	0.0248314365771164	100001980	14.544127	100001980	BCL2-associated athanogene 4	bag4	NA
ENSDARG00000043185	47.2071017101503	-0.650609055006045	0.189031529943587	-3.44180177349359	0.000577853529526691	0.00626740174573071	565484	14.839874	565484	MLLT1, super elongation complex subunit a	mllt1a	NA
ENSDARG00000043285	20.1456250684677	-0.852241802318511	0.287301037696517	-2.96637216889817	0.00301335599239654	0.0208253324859578	ENSDARG00000043285	14.833489	NA	zinc finger and BTB domain containing 21	zbtb21	NA
ENSDARG00000043304	167.938636744609	1.28372730812223	0.332259528696103	3.863628270226	0.000111715187496539	0.00178317456722078	321130	15.207947	321130	NOP2 nucleolar protein homolog (yeast)	nop2	NA
ENSDARG00000043359	199.599375309839	0.321309209491042	0.0978833816716383	3.2825716071898	0.00102864856449068	0.00956414225541408	ENSDARG00000043359	14.842841	NA	required for meiotic nuclear division 5 homolog B	rmnd5b	NA
ENSDARG00000043371	2635.73015524511	-0.325593379150877	0.120803455730042	-2.69523232744664	0.00703395675186072	0.0383167203456802	406405	14.823164	406405	malate dehydrogenase 2, NAD (mitochondrial)	mdh2	NA
ENSDARG00000043394	609.270595238751	1.86101638354056	0.249956381256794	7.44536456394219	9.66770679839897e-14	3.34640765321724e-11	572485	14.82921	572485	si:dkey-71h2.2	si:dkey-71h2.2	NA
ENSDARG00000043402	65.9576887557921	0.502767221926564	0.17877751651726	2.81225084518962	0.00491961206903148	0.0295461584686564	564733	14.543538	564733	zgc:171480	zgc:171480	NA
ENSDARG00000043403	19.4109310426992	-0.997723075997621	0.333195467428276	-2.99440770817926	0.00274978231720393	0.0195044571270056	564675	14.542969	564675	polyamine oxidase (exo-N4-amino) 1	paox1	NA
ENSDARG00000043416	78.9689347917607	0.6204008551578	0.230199157124368	2.69506136732995	0.0070375668345729	0.0383191560453261	567159	14.531645	567159	tumor necrosis factor, alpha-induced protein 2a	tnfaip2a	NA
ENSDARG00000043484	447.345342911041	0.611532131560069	0.13837171659423	4.41948793157899	9.89350459063782e-06	0.000250752736643467	393934	14.593284	393934	ubiquitin-conjugating enzyme E2D 2 (UBC4/5 homolog, yeast)	ube2d2	NA
ENSDARG00000043509	5653.06955418179	-0.362561911628605	0.0955275952875898	-3.7953631150988	0.000147427520161926	0.00221873839349284	415229	14.839825	415229	ribosomal protein L11	rpl11	NA
ENSDARG00000043518	1969.53877154999	-0.568691063848013	0.172941262453054	-3.28834805402435	0.00100777166723393	0.00943520382421871	557525	14.8804035	557525	si:dkey-239i20.2	si:dkey-239i20.2	NA
ENSDARG00000043554	75.4662486730959	0.451134500368509	0.156965393195587	2.87410168053014	0.00405178494725341	0.0256492203370099	447873	14.823151	447873	mitochondrial ribosomal protein L40	mrpl40	NA
ENSDARG00000043608	230.949937187813	0.468003004714298	0.153938187073558	3.04020083392737	0.00236420439566251	0.0175935726372551	799566	15.209884	799566	eukaryotic translation initiation factor 4E binding protein 1	eif4ebp1	NA
ENSDARG00000043663	312.46117183013	0.425389615634959	0.11990068713086	3.54784968972436	0.00038838980066421	0.00462668872669312	550564	14.82342	550564	Finkel-Biskis-Reilly murine sarcoma virus (FBR-MuSV) ubiquitously expressed b	faub	NA
ENSDARG00000043666	48.5247474899069	0.902527483141747	0.264890196993288	3.40717585394304	0.000656388218743307	0.00690889945271517	553568	15.2150755	553568	activator of basal transcription 1	abt1	NA
ENSDARG00000043684	294.869754797022	0.386255147437569	0.138990682264169	2.77900029804476	0.0054526475072601	0.0318552606101105	436627	14.839874	436627	bisphosphate nucleotidase 1	bpnt1	NA
ENSDARG00000043719	10109.2789885991	-1.00395764799056	0.176192655156155	-5.69806753352336	1.21173054679152e-08	1.00729009806702e-06	ENSDARG00000043719	14.839825	NA	complement component c3a, duplicate 6	c3a.6	NA
ENSDARG00000043729	106.200952838754	-4.2845883339895	1.15914133113533	-3.69634678611013	0.000218724156869192	0.00300776749202072	791783	14.838869	791783	placenta-specific 8, tandem duplicate 1	plac8.1	NA
ENSDARG00000043746	20.6464719442561	-0.898632214194392	0.336169272528594	-2.67315393651261	0.00751417606632536	0.0402187493230663	563598	14.823151	563598	neurexin 3a	nrxn3a	NA
ENSDARG00000043821	24.3727829364387	-0.841966753042121	0.289734673839966	-2.90599237531087	0.00366090369641115	0.0238579065529968	553082	14.546301	553082	Kruppel-like factor 7b	klf7b	NA
ENSDARG00000043856	180.390049963039	-0.968762079695832	0.358816936352171	-2.69987835452955	0.00693648334151037	0.0378879601814238	792097	14.833017	792097	adenosylmethionine decarboxylase 1	amd1	NA
ENSDARG00000043857	115.89124775886	0.488943618267939	0.168325183287743	2.90475619106927	0.00367539275737089	0.0239009035188129	322756	14.543775	322756	ubiquitin-fold modifier 1	ufm1	NA
ENSDARG00000043898	27.297383330945	0.809246623907418	0.289339189770086	2.79687872406934	0.00515988975008552	0.0306732405899343	550527	14.842841	550527	translocase of inner mitochondrial membrane 10 homolog B (yeast)	timm10b	NA
ENSDARG00000043899	37.2870340637375	-0.603501107607272	0.213041739087228	-2.83278342635091	0.00461446380949205	0.0282845333095479	83917	15.209884	83917	proteasome subunit alpha 6, like	psma6l	NA
ENSDARG00000043976	796.414794882182	0.826634063570884	0.194730209646192	4.24502220314356	2.18571777158669e-05	0.00047625846767577	266989	14.543792	266989	eukaryotic translation termination factor 1b	etf1b	NA
ENSDARG00000043986	43.8431222671169	0.680717092195501	0.182744999053255	3.72495606294062	0.00019534924344041	0.00273630896887466	322348	14.8207245	322348	SET domain containing 6	setd6	NA
ENSDARG00000043997	368.752013480138	0.606966591974677	0.194202015559112	3.1254391991103	0.00177539767320442	0.0141967763408531	ENSDARG00000043997	14.823884	NA	cytochrome P450, family 2, subfamily X, polypeptide 8	cyp2x8	NA
ENSDARG00000044011	37.1319637544136	-0.666838636762445	0.203987794465737	-3.26901243532221	0.00107923558302771	0.00989775858317996	492765	14.833017	492765	XK, Kell blood group complex subunit-related, X-linked	xkrx	NA
ENSDARG00000044114	12.8819450646611	1.25841799547876	0.392397270406164	3.20699987075902	0.00134127056099433	0.0115490354274672	450082	14.833816	450082	cytochrome b561 family, member D2	cyb561d2	NA
ENSDARG00000044142	976.158641646351	-0.865720491408061	0.305375729416027	-2.83493548443941	0.004583494081489	0.0281587377267947	541435	14.838266	541435	acyl-CoA synthetase short chain family member 1	acss1	NA
ENSDARG00000044203	71.2657610557495	0.67846492323076	0.189288454885763	3.58429109498632	0.000337994963516582	0.00417411720999326	553423	14.852479	553423	sulfatase modifying factor 1	sumf1	NA
ENSDARG00000044253	21.7224001269028	1.50427796061414	0.304563357692528	4.93912981525765	7.84719611683638e-07	3.22267054086348e-05	560764	15.209884	560764	progestin and adipoQ receptor family member IIIb	paqr3b	NA
ENSDARG00000044254	58.1114595246757	-0.71146404881216	0.220760836485659	-3.22278199402628	0.00126952135303505	0.0110691163649657	492336	14.543775	492336	annexin A3b	anxa3b	NA
ENSDARG00000044267	296.32367247529	0.280878482584781	0.0865112309298349	3.24672854109067	0.00116739678265334	0.0104453559984085	406438	14.8207245	406438	small ubiquitin-like modifier 1	sumo1	NA
ENSDARG00000044295	14.4803793701707	-1.06530083083196	0.38328484333795	-2.77939722728003	0.0054459883440906	0.0318552606101105	449831	14.854555	449831	phosphatidylinositol-4-phosphate 5-kinase, type I, beta a	pip5k1ba	NA
ENSDARG00000044318	18.0430618892531	-1.28895116740739	0.367850453572089	-3.50400863962722	0.000458310488576399	0.00526151238129905	797491	14.880964	797491	integrin, beta 7	itgb7	NA
ENSDARG00000044345	264.897991739827	-0.309303692681602	0.101070758089509	-3.06026885053815	0.00221138385451965	0.0166935186716414	336613	14.544127	336613	cytoplasmic FMR1 interacting protein 1	cyfip1	NA
ENSDARG00000044380	26.7500195790479	0.591172174728237	0.223965180092729	2.63957180523988	0.0083010835955884	0.0431250547858291	553240	14.852479	553240	RNA binding motif protein, X-linked 2	rbmx2	NA
ENSDARG00000044402	98.6736900766088	1.03205956677569	0.175419445343681	5.88338176964179	4.01967269061088e-09	4.09229702913872e-07	436807	14.8207245	436807	NOP16 nucleolar protein homolog (yeast)	nop16	NA
ENSDARG00000044405	80.0554795808544	1.06924024032086	0.290917237854789	3.67541039577232	0.000237467376919735	0.00318595489632623	393981	14.823164	393981	tetratricopeptide repeat domain 4	ttc4	NA
ENSDARG00000044417	24.7034180945345	-0.717332417601378	0.226203156958521	-3.17118658840344	0.00151817592897136	0.0126410318759368	619201	14.542969	619201	dispatched homolog 1 (Drosophila)	disp1	NA
ENSDARG00000044441	19.2364238081034	-3.43268180162276	1.07032664644916	-3.20713476863422	0.00134064174319409	0.0115490354274672	108190403	14.839874	108190403	unconventional myosin-VIIb-like	LOC108190403	NA
ENSDARG00000044488	128.178389132492	0.527379043709797	0.184174065626814	2.86348157605648	0.00419013181316361	0.0262993940633991	336470	14.838869	336470	PAK1 interacting protein 1	pak1ip1	NA
ENSDARG00000044525	824.579490315697	0.914519417029174	0.222873202032227	4.10331708204621	4.07268470369742e-05	0.000804903347231553	30750	14.546301	30750	peroxisome proliferator-activated receptor delta a	pparda	NA
ENSDARG00000044526	45.701059836391	1.30621383178586	0.265579977077232	4.9183445460047	8.72791895170954e-07	3.46684387212987e-05	335654	14.8804035	335654	calcium/calmodulin-dependent protein kinase IGa	camk1ga	NA
ENSDARG00000044528	70.7964333923055	-3.03694810725121	1.12038067869249	-2.71063948621053	0.00671535965249128	0.0370563029730904	793301	14.854555	793301	solute carrier family 15 (oligopeptide transporter), member 1b	slc15a1b	NA
ENSDARG00000044550	36.8795300339496	1.03906694430031	0.283516993556884	3.6649194507342	0.000247416439532983	0.00328116760247851	497283	14.825785	497283	hypoxia-inducible factor 1, alpha subunit, like 2	hif1al2	NA
ENSDARG00000044551	67.2407944173742	-0.463665164854204	0.171184641706193	-2.70856754573813	0.00675743554904408	0.0372119689439405	100009663	14.543538	100009663	ATG9 autophagy related 9 homolog A (S. cerevisiae)	atg9a	NA
ENSDARG00000044601	3954.20936759356	0.331961153753115	0.0842721351885349	3.93915679257974	8.17684817599451e-05	0.00140713800642292	447816	14.833816	447816	reticulon 4a	rtn4a	NA
ENSDARG00000044615	12.9666089760759	-1.23059619431775	0.37298063689862	-3.29935678310356	0.000969066609000531	0.00917206403753237	405768	14.544127	405768	protein kinase Npk	LOC405768	NA
ENSDARG00000044628	20.487764780197	0.72755324573601	0.272341272305631	2.67147626790671	0.00755184123421979	0.0403042099350541	445046	14.543775	445046	D-tyrosyl-tRNA deacylase 1	dtd1	NA
ENSDARG00000044669	217.292129610422	-0.619388090966393	0.215316343868452	-2.87664224572199	0.00401930994959372	0.0255075641903237	558102	14.544415	558102	heterochromatin protein 1, binding protein 3	hp1bp3	NA
ENSDARG00000044718	16.3204026538662	-1.09523758601118	0.31475743997174	-3.47962413885915	0.000502117683575232	0.00565874952233854	556413	14.842841	556413	vav 2 guanine nucleotide exchange factor	vav2	NA
ENSDARG00000044803	90.9484763570181	0.705818608886319	0.223963866955854	3.15148429289018	0.00162442899442857	0.0132524964764324	450050	14.593083	450050	dehydrogenase/reductase (SDR family) member 3b	dhrs3b	NA
ENSDARG00000044808	51.1323096672196	-0.929132715967322	0.219874613885654	-4.2257389316009	2.38157974916752e-05	0.000511575153566747	561618	14.839874	561618	solute carrier family 4 (sodium bicarbonate cotransporter), member 4b	slc4a4b	NA
ENSDARG00000044809	436.392849225023	-1.1482783729364	0.135400810852962	-8.4805871228007	2.24060384046944e-17	1.69655722045545e-14	406746	14.82921	406746	folylpolyglutamate synthase	fpgs	NA
ENSDARG00000044812	161.910967061072	0.364387652763658	0.127047978999286	2.86811058022188	0.00412931182137727	0.0260230586144018	569538	14.815266	569538	tetratricopeptide repeat domain 17	ttc17	NA
ENSDARG00000044899	44.5301716122386	0.712468655441718	0.256379959338019	2.77895611373578	0.00545338922867265	0.0318552606101105	541482	14.823164	541482	transmembrane protein 183A	tmem183a	NA
ENSDARG00000044943	329.007486540175	-0.265757155304101	0.0960598136038978	-2.76657996027297	0.00566476909517408	0.0326625281724792	407726	14.835131	407726	aminopeptidase puromycin sensitive	npepps	NA
ENSDARG00000045006	183.740200533132	-0.759804947671908	0.160450149282331	-4.73545802899155	2.18560933840845e-06	7.33574700026897e-05	561197	14.543775	561197	protein tyrosine phosphatase, receptor type, g a	ptprga	NA
ENSDARG00000045064	48.8364839489337	-0.700464849978592	0.183479901631455	-3.81766527968592	0.000134720532651476	0.00206599905452231	541550	14.834426	541550	actin binding LIM protein 1b	ablim1b	NA
ENSDARG00000045074	67.2725710300675	0.554686962549466	0.211796589175586	2.6189607902024	0.00881980845017312	0.0451755810672027	323573	14.593083	323573	ADP-ribosylation factor-like 4D	arl4d	NA
ENSDARG00000045075	229.344047751228	0.430989510636329	0.113135452950105	3.80950002318376	0.000139248093589878	0.00211644735504836	407612	14.879544	407612	transmembrane protein 106A	tmem106a	NA
ENSDARG00000045147	164.096850456049	0.438004300627688	0.136912883479081	3.19914597879761	0.00137835356844082	0.0117762718488438	550413	14.833097	550413	transmembrane protein 184ba	tmem184ba	NA
ENSDARG00000045155	23.8231069816733	0.626633982230191	0.23537564939934	2.66227192077562	0.00776151496748752	0.0411333131369691	286774	15.2150755	286774	PHD finger protein 5A	phf5a	NA
ENSDARG00000045199	277.400373440638	-0.609756474800327	0.135663959601167	-4.49460915480373	6.96978443393846e-06	0.000188059996474754	406768	14.823164	406768	zgc:55262	zgc:55262	NA
ENSDARG00000045254	29.0802236491455	0.806813094564091	0.239537256170313	3.36821548122953	0.000756564401320763	0.00767785237734249	567594	14.880765	567594	chromosome 24 C7orf50 homolog	c24h7orf50	NA
ENSDARG00000045277	96.415403289415	-0.501901377224321	0.17446566488986	-2.87679170306187	0.00401740687767697	0.0255075641903237	494176	14.837396	494176	retinol dehydrogenase 12, like	rdh12l	NA
ENSDARG00000045297	527.286017382265	0.224148737084921	0.0691575771453352	3.24113056496862	0.0011905664044171	0.0105823272116751	324421	14.835336	324421	prohibitin 2a	phb2a	NA
ENSDARG00000045306	2437.69699319468	0.752545033421974	0.1481739704306	5.0787937397847	3.79838808826436e-07	1.80460673291462e-05	447807	14.546301	447807	solute carrier family 51, alpha subunit	slc51a	NA
ENSDARG00000045398	89.435838861772	0.868198883333436	0.176866865022764	4.908770691569	9.1649063388903e-07	3.61670489562397e-05	560667	15.207947	560667	5-methyltetrahydrofolate-homocysteine methyltransferase reductase	mtrr	NA
ENSDARG00000045417	32.1294545753118	-0.694519387545571	0.245464500949794	-2.82940867155217	0.00466341078137097	0.0284907824590566	404610	15.2150755	404610	family with sequence similarity 49, member Bb	fam49bb	NA
ENSDARG00000045437	81.6071671405891	0.452179320871304	0.15237465087177	2.96754951223371	0.0030018393108686	0.0207931865358337	664769	14.823164	664769	solute carrier family 35 (adenosine 3'-phospho 5'-phosphosulfate transporter), member B3	slc35b3	NA
ENSDARG00000045484	62.4474575397612	0.459454780128893	0.17106002184071	2.68592728555089	0.00723288276854006	0.0391014612855256	568176	14.825805	568176	decapping mRNA 1B	dcp1b	NA
ENSDARG00000045525	135.237327366123	0.572415014475679	0.165974305656221	3.4488170455812	0.000563048051459108	0.00616626937460726	556763	14.824423	556763	transmembrane and coiled-coil domain family 3	tmcc3	NA
ENSDARG00000045530	53.5126595940171	-0.550154126599888	0.201827203430065	-2.72586706474641	0.00641328222153663	0.0357227191328351	794484	15.233153	794484	uncharacterized LOC794484	LOC794484	NA
ENSDARG00000045530	53.5126595940171	-0.550154126599888	0.201827203430065	-2.72586706474641	0.00641328222153663	0.0357227191328351	541512	14.536741	541512	si:ch211-244b2.4	si:ch211-244b2.4	NA
ENSDARG00000045540	130.652133920134	-0.360245397040813	0.138239916608776	-2.60594339086822	0.00916216028421799	0.0464627759913357	560729	14.880566	560729	protein phosphatase 6, regulatory subunit 2a	ppp6r2a	NA
ENSDARG00000045557	46.38235484409	-1.00441972774003	0.354463225011149	-2.83363592290408	0.00460217315107061	0.0282448468719455	562062	14.829012	562062	suppressor of cytokine signaling 2	socs2	NA
ENSDARG00000045560	19.2035065284064	-2.00839807016869	0.583827008559899	-3.44005679888417	0.000581592118014179	0.00628946491864761	492356	14.833017	492356	myosin binding protein C, slow type	mybpc1	NA
ENSDARG00000045562	47.2622477705198	0.946932959741257	0.282118067418057	3.35651299616356	0.00078932011175781	0.00791626474749888	494060	14.815266	494060	pseudouridylate synthase 1	pus1	NA
ENSDARG00000045565	118.705100711325	0.611491759695286	0.178409707411893	3.42745789209519	0.000609260784145199	0.00655523481342725	554096	14.8207245	554096	nucleolar complex associated 4 homolog	noc4l	NA
ENSDARG00000045598	134.809381955947	-0.46789327706257	0.139135693657735	-3.3628558191082	0.00077140641789689	0.00778799062735069	553452	14.835336	553452	si:dkey-180p18.9	si:dkey-180p18.9	NA
ENSDARG00000045638	31.7944712269969	-5.05814540006746	1.1540979672975	-4.38276952511395	1.17180059662897e-05	0.000288543988377235	387592	15.22285	387592	solute carrier family 13 member 1	slc13a1	NA
ENSDARG00000045658	139.92162284234	-0.663073670367015	0.160190393810057	-4.13928485095832	3.483901547955e-05	0.000702287308710064	415184	14.852479	415184	methionine sulfoxide reductase B3	msrb3	NA
ENSDARG00000045692	127.511623389675	0.567228195914893	0.137160372995676	4.13551074210606	3.54166046262864e-05	0.000712744460211727	790935	14.8804035	790935	periphilin 1	pphln1	NA
ENSDARG00000045706	100.486519633554	-0.479563090046861	0.151954935373532	-3.15595600016552	0.00159972990753601	0.0131039403852595	431733	14.833097	431733	tetraspanin 9b	tspan9b	NA
ENSDARG00000045749	192.973028125963	-0.669457767821356	0.185419141356544	-3.61051055960856	0.000305594859196048	0.00386459469640931	565020	14.880566	565020	PTPRF interacting protein, binding protein 1a (liprin beta 1)	ppfibp1a	NA
ENSDARG00000045768	331.628034298209	-0.474199434478387	0.120356005552718	-3.93997318455936	8.14907174948158e-05	0.0014053057466218	100003956	14.829012	100003956	cryptochrome circadian clock 1aa	cry1aa	NA
ENSDARG00000045776	911.667634058333	0.513234402322021	0.126759561941581	4.04888116100113	5.1463066694911e-05	0.000971144942381382	326846	15.207947	326846	CCHC-type zinc finger, nucleic acid binding protein a	cnbpa	NA
ENSDARG00000045857	170.00836053296	0.906918126311339	0.17566400397863	5.16280003740362	2.43282984048819e-07	1.30414750077498e-05	550440	14.835336	550440	CCAAT/enhancer binding protein (C/EBP), zeta	cebpz	NA
ENSDARG00000045870	53.9599213846957	-1.36442735014974	0.202669911489365	-6.73226400565796	1.67043188479252e-11	3.67950586986571e-09	567300	14.879544	567300	pleckstrin homology domain containing, family A member 5	plekha5	NA
ENSDARG00000045886	705.220372869524	-1.17706282622531	0.283900010881114	-4.14604713318669	3.38264224471151e-05	0.000687595818702683	566537	14.833097	566537	solute carrier family 38, member 2	slc38a2	NA
ENSDARG00000045910	111.914376565773	-0.384622270291408	0.138115797563121	-2.78478115521601	0.00535638612017707	0.0314180283161591	557799	14.531645	557799	transmembrane protein 181	tmem181	NA
ENSDARG00000045929	3132.15283782577	-0.775539633261352	0.132196195806655	-5.86658056632452	4.44874149659955e-09	4.38182953100029e-07	100002007	14.593083	100002007	ornithine decarboxylase antizyme 2a	oaz2a	NA
ENSDARG00000045930	32.4723984505453	-0.767477227534468	0.255841278730889	-2.99981782197763	0.00270141127535354	0.0192438655705956	436682	14.833097	436682	RNA binding protein with multiple splicing 2a	rbpms2a	NA
ENSDARG00000045951	26.0077610409022	0.784970946324064	0.229728211459336	3.41695493704312	0.000633257606947498	0.00674750739504744	503731	14.543538	503731	K(lysine) acetyltransferase 5b	kat5b	NA
ENSDARG00000045968	77.3774473133746	-0.576242106396829	0.153610211905642	-3.75132681120703	0.000175901238710954	0.00250416393300024	ENSDARG00000045968	14.852479	NA	spastic paraplegia 11	spg11	NA
ENSDARG00000045976	318.539936515296	-0.287660265303746	0.1080907029347	-2.66128591538097	0.0077842825388608	0.0412179121321235	796833	15.209884	796833	SID1 transmembrane family, member 2	sidt2	NA
ENSDARG00000046053	212.786991571746	0.990061193968465	0.171496307260622	5.77307587424535	7.78373699333969e-09	7.03731146823212e-07	ENSDARG00000046053	14.82342	NA	solute carrier family 27 (fatty acid transporter), member 6	slc27a6	NA
ENSDARG00000046106	297.222576097609	0.351116682691746	0.120565738664285	2.91224262034698	0.0035884379175544	0.0235503387709488	436839	14.82419	436839	RAB10, member RAS oncogene family	rab10	NA
ENSDARG00000051763	107.155345362619	-0.534809235407312	0.150500297027883	-3.55354272362817	0.000380079455610591	0.00455006186237382	100331323	14.833489	100331323	syntrophin, beta 2	sntb2	NA
ENSDARG00000051851	23.9552763495724	0.792615647932794	0.250608434489782	3.16276524988671	0.00156278294499932	0.0128972175603997	445166	14.547653	445166	cytosolic thiouridylase subunit 2 homolog (S. pombe)	ctu2	NA
ENSDARG00000051857	11.1202885920641	-1.09958087353349	0.377816796139159	-2.91035466069774	0.00361018831095403	0.0236418548038963	403032	14.839825	403032	testis derived transcript (3 LIM domains)	tes	NA
ENSDARG00000052000	140.569196383044	-0.555198377628725	0.188053424234579	-2.95234388785268	0.00315371492318974	0.0215130947603849	415240	14.82419	415240	caveolin 2	cav2	NA
ENSDARG00000052016	18.2017525781341	1.6765045479738	0.607914527445937	2.75779648664983	0.00581924147441523	0.0332580718270929	572226	15.22285	572226	calcium binding protein 2a	cabp2a	NA
ENSDARG00000052045	89.7393105747964	1.71132647976693	0.414562419998642	4.12803090008143	3.6588295626185e-05	0.000735103153418293	569734	14.815266	569734	gamma-glutamyltransferase 5a	ggt5a	NA
ENSDARG00000052059	22.0087126276144	-0.969651262053932	0.353478069325917	-2.74317233853591	0.00608487411889179	0.034287558116453	101886606	14.829012	101886606	si:dkey-37f13.4	si:dkey-37f13.4	NA
ENSDARG00000052094	87.4521995628632	-0.481200916587632	0.175257045716806	-2.74568656923041	0.00603844225232426	0.0341052344461112	794892	14.82921	794892	notch 1b	notch1b	NA
ENSDARG00000052139	80.2964107129712	-0.554081845609198	0.147523700089574	-3.75588359885746	0.000172730967479683	0.00247386021977809	58066	14.831473	58066	notch 3	notch3	NA
ENSDARG00000052207	10812.3345676217	-0.491222654471332	0.158983859475035	-3.0897643074797	0.00200315386741329	0.0155763685946013	565074	14.837396	565074	complement component c3a, duplicate 3	c3a.3	NA
ENSDARG00000052279	66.0420588384694	-1.18308777517347	0.239150014907884	-4.94705290162401	7.5345505025697e-07	3.11539519927071e-05	393155	15.2150755	393155	oxidative stress induced growth inhibitor 1	osgn1	NA
ENSDARG00000052331	24.3543002958123	-0.79026354306727	0.285522166559628	-2.7677835055312	0.00564389333804527	0.0325909284034406	100000576	14.593284	100000576	ATP-binding cassette, sub-family F (GCN20), member 2b	abcf2b	NA
ENSDARG00000052336	31.7343705371538	-3.5107015413492	0.843512130225781	-4.16200480769553	3.1546570760897e-05	0.000647774075878419	558261	14.827688	558261	OCIA domain containing 2	ociad2	NA
ENSDARG00000052348	109.633246284582	1.20703537994425	0.238459393099935	5.06180681017837	4.15301741935848e-07	1.92773203201257e-05	282615	14.825785	282615	SWI/SNF related, matrix associated, actin dependent regulator of chromatin, subfamily a, member 5	smarca5	NA
ENSDARG00000052374	156.127461721912	0.37679907212061	0.114749067311701	3.28367873437336	0.0010246165040549	0.00954129819110313	497596	14.852479	497596	Fas associated factor family member 2	faf2	NA
ENSDARG00000052377	173.678136573053	0.464875921169201	0.173346442318836	2.68177364906143	0.00732329919261214	0.0394845437109462	321898	14.853864	321898	proteasome 26S subunit, non-ATPase 12	psmd12	NA
ENSDARG00000052388	279.101860521993	0.540680817198362	0.207717967921674	2.60295641541343	0.00924237024842221	0.0466995864226043	692252	14.833489	692252	polycomb group ring finger 5b	pcgf5b	NA
ENSDARG00000052419	122.776349754001	-0.453362696131575	0.168572725406265	-2.6894190328771	0.00715765082964981	0.0387466218950882	393119	15.209884	393119	ankyrin repeat domain 12	ankrd12	NA
ENSDARG00000052423	63.2461422484093	-1.01993479943091	0.166255358184855	-6.13474844099082	8.5294052687916e-10	1.02310638446941e-07	570218	15.209884	570218	protein phosphatase 1, regulatory subunit 12C	ppp1r12c	NA
ENSDARG00000052480	267.841502901067	0.900230880734936	0.144686224933984	6.22195292707154	4.91004367326995e-10	6.39625581738338e-08	794079	14.852479	794079	programmed cell death 11	pdcd11	NA
ENSDARG00000052536	153.393028310328	0.502207362848152	0.163142455799095	3.07833641701829	0.00208159777538168	0.0160219549229664	793165	14.839825	793165	TIA1 cytotoxic granule-associated RNA binding protein	tia1	NA
ENSDARG00000052537	117.816083636781	0.815121588656802	0.197630939270036	4.12446346542456	3.7159996868236e-05	0.000744121259601123	791641	14.82419	791641	ceramide-1-phosphate transfer protein	cptp	NA
ENSDARG00000052553	130.55555990803	0.419925116011614	0.12668740764125	3.31465552757024	0.000917561205126365	0.00880078089497772	563276	14.824423	563276	ligase III, DNA, ATP-dependent	lig3	NA
ENSDARG00000052575	140.470462081155	-0.832131884088798	0.198604945780753	-4.18988500421041	2.79095860576232e-05	0.000585578396742723	793658	14.543538	793658	ADP-ribosylation factor-like 13A	arl13a	NA
ENSDARG00000052606	235.803743581081	0.343377821257885	0.104192156681211	3.29562063206438	0.000982045311284609	0.00924442023112755	768170	14.839874	768170	dipeptidyl-peptidase 9	dpp9	NA
ENSDARG00000052638	312.414618947146	-0.707800608758153	0.165367191080345	-4.28017555437743	1.86745946976436e-05	0.000425268260830738	619270	14.8207245	619270	family with sequence similarity 210, member B	fam210b	NA
ENSDARG00000052641	381.111951399668	0.537601046751244	0.196621442444499	2.73419338230618	0.0062533306094665	0.0350088264018885	368640	14.838869	368640	karyopherin alpha 3 (importin alpha 4)	kpna3	NA
ENSDARG00000052693	52.8874455792791	-0.647565251734846	0.213651416373871	-3.03094293838738	0.002437913157965	0.0179983655751042	ENSDARG00000052693	14.82921	NA	si:dkey-172m14.1	si:dkey-172m14.1	NA
ENSDARG00000052826	19.9928003028467	-1.51663931522657	0.447160545460581	-3.39171094279887	0.00069457674337499	0.00718814222750633	58127	14.543775	58127	runt-related transcription factor 3	runx3	NA
ENSDARG00000052851	438.90730362592	0.353217759914154	0.0931686694630363	3.79116458300705	0.000149942546832773	0.00224821034019684	450085	14.595437	450085	golgi phosphoprotein 3	golph3	NA
ENSDARG00000052950	32.3889267524178	-0.909005870802331	0.200203846441007	-4.54040163044612	5.61471703347169e-06	0.0001567334029044	100006233	14.835336	100006233	Rho GTPase activating protein 23a	arhgap23a	NA
ENSDARG00000052957	27.4338824032269	-1.08435472426536	0.267730645347362	-4.05017036005902	5.11803594281303e-05	0.000967316777647112	569040	14.544127	569040	phospholipase C, delta 3a	plcd3a	NA
ENSDARG00000052975	547.526900895295	0.381394877425645	0.131429632782683	2.90189411132478	0.00370913891420355	0.0240292278063139	334337	15.2150755	334337	ubiquilin 4	ubqln4	NA
ENSDARG00000052978	17.2187358997459	-2.62221520833068	0.346808866767451	-7.56098087333212	4.00041072836281e-14	1.69762407186665e-11	767696	15.2150755	767696	muscleblind-like splicing regulator 1	mbnl1	NA
ENSDARG00000053021	89.1931394131728	0.517711017089225	0.18111486179391	2.85846789137784	0.00425692187856794	0.0265975289112174	563249	14.827688	563249	G-rich RNA sequence binding factor 1	grsf1	NA
ENSDARG00000053027	65.0792111339207	1.06676264363882	0.253924630206358	4.20109952615424	2.6562177999096e-05	0.000561606957171113	ENSDARG00000053027	15.209884	NA	si:dkey-33i11.1	si:dkey-33i11.1	NA
ENSDARG00000053047	1165.64524713272	0.434130499269909	0.0693102920412779	6.26357913787697	3.76240073560524e-10	5.06460943465083e-08	324365	14.595437	324365	eukaryotic translation initiation factor 2, subunit 2 beta	eif2s2	NA
ENSDARG00000053113	56.0681065826252	-1.11377794548012	0.221938158377811	-5.01841573175582	5.20993372632327e-07	2.32848570586531e-05	504036	14.880765	504036	lymphocyte antigen 75	ly75	NA
ENSDARG00000053136	3479.18825119948	-0.34846049315254	0.118117175063238	-2.95012552548755	0.00317644846872606	0.0216316319272716	30400	14.880566	30400	beta-2-microglobulin	b2m	NA
ENSDARG00000053138	42.1391835471033	0.774253164862346	0.273832519953239	2.82746974316477	0.0046917448888665	0.0286205887858095	553404	15.209884	553404	leucine rich repeat containing 47	lrrc47	NA
ENSDARG00000053155	70.6372007784358	0.790318249362449	0.191941806675689	4.11748885274274	3.8302304969072e-05	0.000763211224836032	553725	14.839874	553725	asparagine-linked glycosylation 3 (alpha-1,3-mannosyltransferase)	alg3	NA
ENSDARG00000053263	25.6226615385267	0.77260675179103	0.230493162717634	3.3519725387148	0.000802379773548391	0.00798492566355481	569258	14.543775	569258	zgc:113372	zgc:113372	NA
ENSDARG00000053272	10.4625603924733	-1.53828309886113	0.443962872436137	-3.46489131043813	0.000530445813338291	0.00588493683937124	100538309	14.823884	100538309	si:dkey-166d12.2	si:dkey-166d12.2	NA
ENSDARG00000053279	24.5936104449763	-0.81411363823405	0.269193130708751	-3.02427345040564	0.00249231056376791	0.0182604991062081	798375	14.546301	798375	apelin	apln	NA
ENSDARG00000053370	239.477724003019	0.795571225319086	0.186003351116915	4.27718759120107	1.89269302064583e-05	0.000430129931969896	406823	14.839825	406823	eukaryotic translation initiation factor 3, subunit Jb	eif3jb	NA
ENSDARG00000053395	43.8602282388204	0.726277300716586	0.237326563375932	3.06024445972423	0.00221156396764214	0.0166935186716414	450034	14.546301	450034	CDKN2A interacting protein N-terminal like	cdkn2aipnl	NA
ENSDARG00000053447	185.739906591543	0.4130222903744	0.152792850721348	2.70315193691647	0.00686853419270781	0.037652620698939	100005419	14.546301	100005419	protein phosphatase 4, regulatory subunit 2b	ppp4r2b	NA
ENSDARG00000053452	28.9069676595173	0.691560972735733	0.253815523807635	2.72465987249803	0.0064367758918661	0.0358041964784012	541421	14.833489	541421	POP5 homolog, ribonuclease P/MRP subunit	pop5	NA
ENSDARG00000053466	173.27924221421	0.347049828884282	0.126883218462315	2.7351909345471	0.00623441016917564	0.0349190380025718	550526	14.839874	550526	translocase of inner mitochondrial membrane domain containing 1	timmdc1	NA
ENSDARG00000053493	28.5646916040237	-1.86189102883543	0.507199073041618	-3.67092750716178	0.000241671883441134	0.00322450976639795	116713	14.833816	116713	aldehyde dehydrogenase 1 family, member A2	aldh1a2	NA
ENSDARG00000053496	89.5380676465317	0.405992684845644	0.157064740294599	2.58487477255648	0.00974143713234194	0.0483480175576905	100000842	14.852479	100000842	gem (nuclear organelle) associated protein 8	gemin8	NA
ENSDARG00000053586	38.6044119548329	-0.600407388633368	0.213021310997584	-2.81853203241331	0.00482437970458522	0.02919448557495	573207	14.546301	573207	cAMP responsive element binding protein 1a	creb1a	NA
ENSDARG00000053620	917.156657360725	-0.400825538084263	0.136241804252463	-2.94201578057138	0.00326083309555262	0.0220451969601674	100134974	14.552193	100134974	Epstein-Barr virus induced 3	ebi3	NA
ENSDARG00000053713	90.6971763985311	-0.575850202921345	0.162492204557163	-3.54386356250566	0.00039430924226038	0.004687984759553	553231	14.831473	553231	coiled-coil domain containing 88C	ccdc88c	NA
ENSDARG00000053840	417.339630352982	0.413167820305907	0.126531300475705	3.26534081885325	0.00109332437835737	0.0099677362103153	550597	14.536741	550597	etoposide induced 2.4	ei24	NA
ENSDARG00000053853	262.368849945187	-3.16129510787158	1.13738295714406	-2.77944652503808	0.00544516180306941	0.0318552606101105	406537	14.543775	406537	solute carrier family 13 (sodium-dependent dicarboxylate transporter), member 2	slc13a2	NA
ENSDARG00000053864	40.7716559640395	-0.905565763270322	0.31604143088853	-2.86533876499794	0.00416563345327465	0.0262028293283605	560411	14.542969	560411	ELM2 and Myb/SANT-like domain containing 1b	elmsan1b	NA
ENSDARG00000053912	433.139009030418	1.36104670461265	0.167345492560766	8.1331542534283	4.18261848690045e-16	2.41297252232376e-13	406275	14.535736	406275	fibrillarin	fbl	NA
ENSDARG00000053956	190.461429150718	-0.709194132079157	0.196248593836382	-3.61375395469296	0.000301795470698408	0.00382453151413307	558044	14.592884	558044	spectrin, beta, non-erythrocytic 1	LOC558044	NA
ENSDARG00000054058	618.250740242435	0.807031595698957	0.255228456502691	3.16199692917255	0.00156691216709048	0.0129144684247356	322508	14.535481	322508	H1 histone family, member X	h1fx	NA
ENSDARG00000054154	160.059891493088	0.814898149282678	0.172765471134206	4.71678827912122	2.39596791452946e-06	7.88781284905555e-05	553241	14.546301	553241	BMS1 ribosome biogenesis factor	bms1	NA
ENSDARG00000054164	38.1813656583536	0.709456956310039	0.199943885954734	3.5482803233636	0.000387755299530317	0.00462668872669312	553580	14.552193	553580	mitochondrial ribosomal protein S17	mrps17	NA
ENSDARG00000054199	13.3250513035191	-1.01171947279425	0.370849782518458	-2.72811127439153	0.00636981167056766	0.0355459550386583	327496	14.817384	327496	methylenetetrahydrofolate dehydrogenase (NADP+ dependent) 2 like	mthfd2l	NA
ENSDARG00000054208	179.536289418891	0.58553856626672	0.191668910962088	3.0549480524911	0.00225099507226245	0.0169278741778148	393937	14.833816	393937	phosphorylase kinase, gamma 2 (testis)	phkg2	NA
ENSDARG00000054224	149.855471735933	-0.621171882386991	0.156426401358397	-3.97101689352165	7.15665037210478e-05	0.00127130233516201	432373	14.5362015	432373	importin 11	ipo11	NA
ENSDARG00000054239	22.6731394080498	-1.71236589196521	0.358418375749887	-4.77756166486324	1.77433645906481e-06	6.21274167675439e-05	798613	14.592722	798613	ghrelin/obestatin prepropeptide	ghrl	NA
ENSDARG00000054250	69.9990240753148	-0.627671272978152	0.237866073950618	-2.63875912421398	0.00832100809950628	0.0431915223331271	445491	14.591863	445491	cereblon	crbn	NA
ENSDARG00000054259	103.428526109496	0.676610157992121	0.255774812422955	2.64533536974416	0.0081609988105568	0.0426717741000844	393617	14.799049	393617	N-acetyltransferase 10	nat10	NA
ENSDARG00000054355	238.803828291308	0.293647799725995	0.101145559126942	2.90321989675744	0.00369347200251774	0.023964850747791	337565	14.566182	337565	ddb1 and cul4 associated factor 7	dcaf7	NA
ENSDARG00000054433	152.113167723174	0.346248538707112	0.103455458421782	3.34683683189995	0.000817393077883515	0.008076070739822	415186	14.55516	415186	Yip1 domain family, member 6	yipf6	NA
ENSDARG00000054446	72.6421026159477	0.616391573401392	0.237336746922136	2.59711815129755	0.0094009580957928	0.0472067376364449	393631	14.829012	393631	coiled-coil domain containing 43	ccdc43	NA
ENSDARG00000054447	374.180085807442	-0.348555537642197	0.0976958190077437	-3.56776309551762	0.00036004179913149	0.00438823581134608	100331439	14.538103	100331439	solute carrier family 29 (equilibrative nucleoside transporter), member 1b	slc29a1b	NA
ENSDARG00000054454	68.8363082699144	-0.577460417734303	0.182452228102215	-3.16499515374947	0.00155085534191368	0.0128337516853035	64271	14.566872	64271	eph receptor A4a	epha4a	NA
ENSDARG00000054458	282.198322275082	-0.334976844747226	0.115454240578497	-2.90138190740145	0.00371520783012667	0.0240436660587525	572011	14.547449	572011	sarcolemma associated protein a	slmapa	NA
ENSDARG00000054530	205.516523721123	0.431902877887121	0.13631308169979	3.16846242856077	0.0015324755506757	0.0127251139797368	337070	14.540007	337070	arginyl-tRNA synthetase	rars	NA
ENSDARG00000054534	26.8078060856874	-1.70577399693983	0.543466686563407	-3.13869099820309	0.00169704298372755	0.013743098761938	100536873	14.852479	100536873	acyl-CoA thioesterase 12	acot12	NA
ENSDARG00000054609	83.5578107632109	-0.663123688728607	0.216400129489564	-3.0643405357139	0.0021815043834428	0.0164974566825278	792084	14.546135	792084	solute carrier organic anion transporter family, member 2B1	slco2b1	NA
ENSDARG00000054793	182.812781183622	0.250574765301382	0.094803615177974	2.64309293301716	0.00821524832498517	0.0428469036773742	565829	14.592722	565829	ER membrane protein complex subunit 10	emc10	NA
ENSDARG00000054837	18.57423169577	-1.98207682936484	0.463498264845544	-4.27634142282139	1.89989776966888e-05	0.000430129931969896	664693	14.535481	664693	zgc:136870	zgc:136870	NA
ENSDARG00000054846	61.7786071809371	1.08986965481579	0.33503273271324	3.25302440149521	0.00114183691331374	0.010285021713603	ENSDARG00000054846	14.82419	NA	NA	CU657980.1	NA
ENSDARG00000054916	1011.3434898032	1.39352934619461	0.367320022348627	3.79377453285678	0.000148374413334825	0.00223021838405881	492482	14.536508	492482	eukaryotic translation initiation factor 4E binding protein 3	eif4ebp3	NA
ENSDARG00000054978	64.1741896362952	-0.810863071830938	0.203144702789634	-3.99155410254839	6.56417086480048e-05	0.00118693925413519	568367	14.833097	568367	kinesin family member C3	kifc3	NA
ENSDARG00000054980	134.386478792073	1.05361599506687	0.184917513909417	5.69776206045572	1.21390304843405e-08	1.00729009806702e-06	335049	14.593284	335049	EBNA1 binding protein 2	ebna1bp2	NA
ENSDARG00000055092	88.472165969908	0.532197048594401	0.154584929478275	3.44274859386727	0.000575834354090072	0.00625689644179533	568202	14.799049	568202	P450 (cytochrome) oxidoreductase a	pora	NA
ENSDARG00000055151	147.950120863729	0.41708111485933	0.13420268824162	3.10784471104195	0.00188457063720188	0.014844976118141	541423	14.542969	541423	SET and MYND domain containing 2a	smyd2a	NA
ENSDARG00000055158	1230.46476130801	0.689499296694944	0.230549226523424	2.9906814570245	0.0027835569382989	0.0197324706304805	30679	14.544127	30679	prospero homeobox 1a	prox1a	NA
ENSDARG00000055186	23.1491352878639	-1.21163390493016	0.360980683169896	-3.35650621049966	0.000789339481219863	0.00791626474749888	553366	14.592722	553366	chemokine (C-C motif) receptor 9a	ccr9a	NA
ENSDARG00000055226	17.2232461932237	-1.3361636752762	0.427819930435719	-3.12319174545087	0.00178901155583173	0.0142591282887509	641560	14.527583	641560	solute carrier family 7 (amino acid transporter light chain, y+L system), member 7	slc7a7	NA
ENSDARG00000055240	2720.38387509234	-0.412170525807711	0.142453518154197	-2.89336852573596	0.00381133817131329	0.0245240399063854	560486	14.527806	560486	xanthine dehydrogenase	xdh	NA
ENSDARG00000055255	549.832657074043	-0.663297925205022	0.192336660074893	-3.44862973572871	0.000563438728657882	0.00616626937460726	337272	14.8804035	337272	PITPNM family member 3	pitpnm3	NA
ENSDARG00000055283	572.552560747378	0.563940479366918	0.17385786484067	3.2436869041486	0.00117993368969403	0.0105186877488176	266599	14.545806	266599	inhibitor of DNA binding 2a	id2a	NA
ENSDARG00000055284	25.7408158097651	-1.11651589073297	0.298268756791832	-3.74332163630605	0.000181603526877563	0.00257626080576308	568356	14.831473	568356	actin filament associated protein 1	afap1	NA
ENSDARG00000055290	61.8793617071025	-0.836870096497123	0.28458447903837	-2.94067371251223	0.00327499310553932	0.0221039228265231	335407	14.802482	335407	macrophage expressed 1, tandem duplicate 1	mpeg1.1	NA
ENSDARG00000055302	21.6481061663981	-1.24739125296469	0.446047043265518	-2.79654639975308	0.00516519936573417	0.0306897451279399	448841	14.535736	448841	glutamate receptor, ionotropic, delta 2	grid2	NA
ENSDARG00000055307	484.584556599806	-0.28713539853593	0.0720392224053948	-3.98582034825555	6.72473800280911e-05	0.00120875668997081	393640	14.541529	393640	synaptophysin-like 2a	sypl2a	NA
ENSDARG00000055350	110.830634530616	-0.386779777392629	0.150036882911354	-2.57789798006634	0.00994033408871599	0.0492142000346523	553188	14.55516	553188	Sad1 and UNC84 domain containing 1	sun1	NA
ENSDARG00000055357	134.909333743113	0.570977759314544	0.133531536106348	4.27597686631721	1.90300985171989e-05	0.000430129931969896	404599	14.809612	404599	LEO1 homolog, Paf1/RNA polymerase II complex component	leo1	NA
ENSDARG00000055360	179.425192644207	0.675544011521024	0.121830322259923	5.54495792992946	2.94024856619683e-08	2.1077580697914e-06	100003313	14.547653	100003313	LLP homolog, long-term synaptic facilitation (Aplysia)	llph	NA
ENSDARG00000055398	17.3198449764114	-1.139956975499	0.34121741097467	-3.3408523095078	0.00083521639228364	0.00820652602799376	79375	14.551187	79375	forkhead box C1b	foxc1b	NA
ENSDARG00000055416	1467.83966008566	-0.71208073558174	0.144249723284416	-4.93644437832117	7.95597139269e-07	3.23128878487328e-05	436926	14.538123	436926	serpin peptidase inhibitor, clade B (ovalbumin), member 1	serpinb1	NA
ENSDARG00000055443	86.0059638962509	0.889096260116167	0.227315994644357	3.91127892917164	9.18086686310432e-05	0.00153839836855475	317641	14.541529	317641	zinc finger, CCHC domain containing 7	zcchc7	NA
ENSDARG00000055493	30.8148320934825	-0.722263695489765	0.212916346400998	-3.3922416371427	0.000693232752534979	0.00718435825231931	436585	14.566941	436585	hypermethylated in cancer 1	hic1	NA
ENSDARG00000055536	83.539290388116	0.36077610340639	0.126391622395436	2.8544305118392	0.00431140623489552	0.0268499246116006	436684	14.592722	436684	OTU deubiquitinase, ubiquitin aldehyde binding 1a	otub1a	NA
ENSDARG00000055539	49.6090566113953	-3.26933301717598	1.03316045675681	-3.16440006563813	0.00155403019951339	0.0128398940966996	557419	14.825785	557419	ependymin-like 2	epdl2	NA
ENSDARG00000055543	113.681761757488	-0.778288839447972	0.168307943475123	-4.62419552742624	3.76055014318446e-06	0.000115048143900706	170846	14.536508	170846	amyloid beta (A4) precursor protein b	appb	NA
ENSDARG00000055629	26.3094054543065	1.79805191646684	0.557742768133257	3.22380139949613	0.00126501098282623	0.0110494650734966	100141362	14.527583	100141362	deleted in autism 1b	dia1b	NA
ENSDARG00000055635	304.363482158915	0.41302461062421	0.157802520328685	2.61735116628002	0.00886151235470605	0.0453366647708039	445234	14.593083	445234	v-crk avian sarcoma virus CT10 oncogene homolog	crk	NA
ENSDARG00000055722	248.418224770092	-0.760872587222212	0.148707530802131	-5.11657064788885	3.1114077721842e-07	1.53855939428619e-05	793849	14.829012	793849	beta-carotene oxygenase 2a	bco2a	NA
ENSDARG00000055723	25.3487571402981	-1.23797415845364	0.443713085143096	-2.79003301886939	0.00527026664597203	0.0310702094481514	560210	14.5362015	560210	heat shock cognate 70-kd protein, like	hsp70l	NA
ENSDARG00000055743	40.3684867893977	0.666788387625443	0.187300351772233	3.55999538343788	0.000370861313527949	0.00447929202527282	436851	14.546301	436851	ankyrin repeat domain 54	ankrd54	NA
ENSDARG00000055760	87.7336702236235	0.68621775649908	0.231643630239652	2.96238560839828	0.0030526521528021	0.0210130004722713	394009	14.55516	394009	spermidine synthase	srm	NA
ENSDARG00000055770	78.729616329471	0.57109210207163	0.146826848720636	3.88956180050035	0.000100425392858691	0.00164635133218274	436904	14.802482	436904	DNA fragmentation factor, alpha polypeptide	dffa	NA
ENSDARG00000055786	29.5136089423495	-0.849251493172463	0.253441584188247	-3.35087667595098	0.000805561687712846	0.00799294008733917	563933	14.823164	563933	serine protease 23-like	LOC563933	NA
ENSDARG00000055930	79.8964559884787	-0.63402073136678	0.16121858732772	-3.93267762654416	8.40048627669367e-05	0.00143745609099073	557754	14.854555	557754	zinc finger CCCH-type containing 7B	zc3h7b	NA
ENSDARG00000055989	106.258351561344	0.535850022756437	0.15739334363228	3.40452785607218	0.000662785399765767	0.00695809802267094	406680	14.566182	406680	transmembrane protein 161B	tmem161b	NA
ENSDARG00000056001	94.1382660567874	-0.849390995968327	0.210870812721213	-4.02801594496288	5.62495296692051e-05	0.00104358813467446	792949	14.854555	792949	furry homolog b (Drosophila)	fryb	NA
ENSDARG00000056045	13.159767425242	-1.69695533920919	0.653484057197408	-2.59678154427655	0.00941017510458228	0.0472067376364449	568219	14.837396	568219	si:ch73-139e5.4	si:ch73-139e5.4	NA
ENSDARG00000056059	55.3581105961716	1.21228858334367	0.234975675778036	5.15920883865799	2.47995564552318e-07	1.31199400198748e-05	568424	14.54133	568424	Ran GTPase activating protein 1b	rangap1b	NA
ENSDARG00000056186	1445.90462878997	0.331090057599381	0.103613502488877	3.19543350669882	0.00139620951086418	0.0118929754595097	406546	14.538103	406546	eukaryotic translation initiation factor 5A2	eif5a2	NA
ENSDARG00000056203	592.152395596323	0.354904261271965	0.134405758793142	2.6405435634509	0.00827731503762389	0.0430569650840762	555526	14.593083	555526	si:ch211-201h21.5	si:ch211-201h21.5	NA
ENSDARG00000056226	753.269736104415	-1.11510723240263	0.151856323407229	-7.34317285828315	2.08588845813175e-13	7.01959407507392e-11	553700	14.369939	553700	cAMP responsive element binding protein 3-like 3a	creb3l3a	NA
ENSDARG00000056235	155.872976169467	0.45908138417865	0.125265823598269	3.66485742871844	0.000247476403852189	0.00328116760247851	572679	14.546743	572679	survival motor neuron domain containing 1	smndc1	NA
ENSDARG00000056239	56.1450807881585	-0.491898233051972	0.188809293757977	-2.6052649382954	0.00918032419686223	0.0465103686666583	402977	14.527806	402977	transmembrane protein 45B	tmem45b	NA
ENSDARG00000056252	74.5589883470394	-0.655560522813468	0.178749511736858	-3.667481474179	0.000244951291726192	0.00326108230688221	799153	14.544415	799153	sortilin 1b	sort1b	NA
ENSDARG00000056270	48.5984057788808	0.691791670798388	0.197973552338196	3.49436408362572	0.00047519249793899	0.00541576398168472	560253	14.531645	560253	ATP synthase mitochondrial F1 complex assembly factor 2	atpaf2	NA
ENSDARG00000056367	34.1912368298123	1.76157664972007	0.390517874580153	4.51087329002276	6.45612792759367e-06	0.00017616213928558	436840	14.566941	436840	MPV17 mitochondrial membrane protein-like 2	mpv17l2	NA
ENSDARG00000056396	111.99035831154	-0.491862229497099	0.137239022614606	-3.58398231149127	0.000338395012255795	0.0041748020096527	436787	14.543775	436787	dual specificity phosphatase 22a	dusp22a	NA
ENSDARG00000056410	1154.30117114397	1.91521211651227	0.165339565805565	11.583507596509	4.99591854219788e-31	6.05255531387273e-27	100126232	14.825805	100126232	ferredoxin 1	fdx1	NA
ENSDARG00000056481	79.8556156103831	-0.992221034308191	0.153919452617283	-6.44636540369801	1.14564263410318e-10	1.90129596056987e-08	368752	14.551187	368752	vesicle amine transport 1	vat1	NA
ENSDARG00000056490	51.2023722763009	-0.709748162324958	0.181336997876327	-3.91397326875903	9.07896909181066e-05	0.00152870732149854	553590	14.543775	553590	zgc:110158	zgc:110158	NA
ENSDARG00000056517	52.5989529804743	0.559720755565871	0.215776915204696	2.59397885559211	0.00948723213584732	0.0474231863540049	445302	14.592722	445302	THO complex 3	thoc3	NA
ENSDARG00000056525	261.017736031416	-0.567619466471248	0.179051616158654	-3.17014433406897	0.00152363233643277	0.0126777512059636	568309	14.544127	568309	breast cancer anti-estrogen resistance 1	bcar1	NA
ENSDARG00000056541	1131.97078518093	0.678333377121632	0.123276086142187	5.50255445601382	3.74327550630775e-08	2.56213461914793e-06	ENSDARG00000056541	14.817384	NA	nuclear receptor subfamily 0, group B, member 1	nr0b1	NA
ENSDARG00000056557	624.527722972129	0.419806348517288	0.141613496325983	2.96445154881939	0.00303222988209506	0.0209080620498472	338138	14.545337	338138	coatomer protein complex, subunit beta 1	copb1	NA
ENSDARG00000056559	114.773711341282	0.377314470573444	0.139493143138973	2.70489618401914	0.00683257392445161	0.0375064037583739	393103	14.833816	393103	CCZ1 homolog, vacuolar protein trafficking and biogenesis associated	ccz1	NA
ENSDARG00000056590	295.580772953878	-2.07626649555384	0.696352435980637	-2.98163169721658	0.0028671669782453	0.0201356732904138	436744	14.566941	436744	calcitonin/calcitonin-related polypeptide, alpha	calca	NA
ENSDARG00000056628	61.7954299259646	0.561110127905904	0.182311447926374	3.07775586386933	0.00208565705733494	0.0160430065076907	393662	14.593083	393662	transmembrane protein 170A	tmem170a	NA
ENSDARG00000056665	77.5144476985834	0.640191339215245	0.161660110561602	3.9601070232554	7.49161811145725e-05	0.00132097398108737	325292	14.533042	325292	NOP2/Sun RNA methyltransferase family, member 2	nsun2	NA
ENSDARG00000056683	13.6901826342535	-1.03412977649644	0.291469941961651	-3.5479808639496	0.000388196424190077	0.00462668872669312	65234	14.544415	65234	cyclin-dependent kinase 5	cdk5	NA
ENSDARG00000056691	2386.53508230791	-0.740723759087569	0.17171363585029	-4.31371542172326	1.60533563987735e-05	0.000379115814368697	393956	14.592884	393956	cytoplasmic polyadenylation element binding protein 4a	cpeb4a	NA
ENSDARG00000056720	118.977574609792	0.987266265352563	0.21567410955989	4.57758359298297	4.70377845120813e-06	0.000137316327557558	447856	14.566182	447856	UTP3, small subunit (SSU) processome component, homolog (S. cerevisiae)	utp3	NA
ENSDARG00000056726	659.703095863822	-0.32909985732325	0.108574985243155	-3.03108360168069	0.00243677767625333	0.0179983655751042	569131	14.542969	569131	methyltransferase like 7A	mettl7a	NA
ENSDARG00000056741	41.8433481440542	0.573218721465273	0.193292525414462	2.96555037622984	0.00302141857450857	0.0208453792882524	565123	14.540007	565123	SUMO1/sentrin/SMT3 specific peptidase 3b	senp3b	NA
ENSDARG00000056762	96.7580037070796	-3.25131605736948	0.80971713676356	-4.01537266503336	5.93519367631822e-05	0.00108946774831205	563398	9.094492	563398	zgc:172079	zgc:172079	NA
ENSDARG00000056781	87.1158541319695	-3.12541205026117	0.907986917933741	-3.44213334854373	0.000577145668481845	0.0062653402989763	100147904	14.831221	100147904	zonadhesin	LOC100147904	NA
ENSDARG00000056798	12.8710346260752	-2.38988409666109	0.769047761879681	-3.10758865069682	0.00188620404797365	0.0148481884608192	641563	14.595437	641563	zgc:123297	zgc:123297	NA
ENSDARG00000056885	113.606597502962	-1.02682877442555	0.310918905940166	-3.30256139079286	0.000958061139339499	0.00908920180352234	563926	14.545806	563926	period circadian clock 1a	per1a	NA
ENSDARG00000056886	25.0745488935093	0.687652056105203	0.229092109219747	3.00164007589455	0.00268529463868213	0.0191705035637207	100037389	14.538103	100037389	TBCC domain containing 1	tbccd1	NA
ENSDARG00000056914	50.9409863117721	0.695428826067154	0.19456563718261	3.57426334956804	0.00035121530266684	0.00429795292101896	678588	14.809612	678588	EMG1 N1-specific pseudouridine methyltransferase	emg1	NA
ENSDARG00000056964	186.778821128838	-0.427899895859603	0.126172235153179	-3.39139506675231	0.000695377853127315	0.00718814222750633	393543	14.542969	393543	integrin-linked kinase	ilk	NA
ENSDARG00000056966	222.048307577241	0.532715768100874	0.111356884504328	4.78386020291517	1.71960304596257e-06	6.05610200634782e-05	445223	14.799049	445223	NIMA-related kinase 7	nek7	NA
ENSDARG00000057011	115.755072632775	0.409838582683179	0.14331361004038	2.85973246063442	0.00423998541251854	0.0265053783656667	445202	14.541529	445202	dolichyl-phosphate mannosyltransferase polypeptide 1, catalytic subunit	dpm1	NA
ENSDARG00000057021	67.2173961569361	0.550423062373441	0.15984628772432	3.44345227036321	0.000574337961448243	0.00625166613022952	335810	14.536741	335810	vacuolar protein sorting 36 homolog (S. cerevisiae)	vps36	NA
ENSDARG00000057035	11.477207504692	-1.48448471738036	0.475279611135925	-3.12339238334339	0.00178779230846496	0.0142591282887509	550523	14.543775	550523	stomatin (EPB72)-like 3b	stoml3b	NA
ENSDARG00000057058	482.863653091358	0.293738557707631	0.113594427128038	2.58585359453016	0.00971381811210417	0.0482504741402796	561891	14.802482	561891	multiple inositol-polyphosphate phosphatase 1a	minpp1a	NA
ENSDARG00000057064	44.9038879581774	-1.31487555611647	0.465314754361649	-2.8257766249435	0.00471661427013991	0.0287288998907718	504088	14.547653	504088	glutamyl aminopeptidase	enpep	NA
ENSDARG00000057089	28.1823208306412	0.643527899024503	0.2154321144185	2.98714934289871	0.00281592127218666	0.0199036675685772	492512	14.533042	492512	FtsJ RNA methyltransferase homolog 1	ftsj1	NA
ENSDARG00000057105	83.5820887513371	1.45340615008454	0.242751733246398	5.98721224622236	2.13468144003779e-09	2.35106051327798e-07	553606	14.536508	553606	notchless homolog 1 (Drosophila)	nle1	NA
ENSDARG00000057121	779.601953954579	2.90365499169401	0.601703195862808	4.82572639078364	1.39493906145538e-06	5.04813855223222e-05	570832	14.832098	570832	complement component 7b	c7b	NA
ENSDARG00000057234	284.886774756386	0.416448780268053	0.126806077877142	3.28413895642711	0.0010229447236324	0.00954039671039762	321491	14.566941	321491	chromatin target of PRMT1a	chtopa	NA
ENSDARG00000057272	199.218522023146	0.354296019707893	0.110624166411246	3.2027000175603	0.00136145718825562	0.011697910521785	497184	14.592722	497184	solute carrier family 30 (zinc transporter), member 9	slc30a9	NA
ENSDARG00000057299	381.778332532588	0.285642291075207	0.0997801785675201	2.86271577357336	0.00420027159105691	0.0263250337949584	436977	14.538103	436977	polysaccharide biosynthesis domain containing 1	pbdc1	NA
ENSDARG00000057477	25.4141839720587	-0.666692815303052	0.240065235015083	-2.77713187109814	0.00548409238783852	0.031957565790603	555592	14.825805	555592	leucine rich repeat containing 28	lrrc28	NA
ENSDARG00000057484	758.998158476062	0.18452845797892	0.0647910362674684	2.84805535779911	0.00439872724653503	0.0273144954340194	406691	14.543538	406691	serine/arginine-rich splicing factor 2a	srsf2a	NA
ENSDARG00000057497	77.9859772670384	-0.519617913303059	0.162794025734229	-3.19187335628253	0.00141353295021318	0.0120150419373094	494084	14.566872	494084	serine/threonine kinase 35, like	stk35l	NA
ENSDARG00000057624	89.2921315810591	0.597531218761177	0.133937046309544	4.46128412732214	8.14699880973896e-06	0.000213638291298674	393698	14.547653	393698	COP9 signalosome subunit 5	cops5	NA
ENSDARG00000057648	245.966751564188	0.714639247820598	0.232518466786234	3.07347307806568	0.00211582777653263	0.016197752482603	564961	14.527583	564961	deoxynucleotidyltransferase, terminal, interacting protein 2	dnttip2	NA
ENSDARG00000057691	410.622374326722	0.45270947711062	0.102722043717374	4.40713074553102	1.04748963793286e-05	0.00026383236930471	406288	14.566182	406288	serine/arginine-rich splicing factor 1a	srsf1a	NA
ENSDARG00000057719	627.274206615089	0.608470251992094	0.120494519899733	5.04977531342024	4.42330019937914e-07	2.02985916346509e-05	323665	14.799049	323665	atlastin GTPase 2	atl2	NA
ENSDARG00000057737	211.391713365746	-1.7678748053125	0.235409288795124	-7.50979204924692	5.92213600260715e-14	2.39155592238619e-11	555578	14.566182	555578	retinoid X receptor, alpha a	rxraa	NA
ENSDARG00000057782	195.865154653491	-0.719243553296957	0.231056826842066	-3.11284268518317	0.00185294757556574	0.0146339373389693	561095	14.825805	561095	bromodomain adjacent to zinc finger domain, 2Ba	baz2ba	NA
ENSDARG00000057855	144.763921626233	0.933631691841067	0.202555331063191	4.60926743789232	4.04090262369943e-06	0.000121313606672251	407642	14.540007	407642	mitochondrial ribosomal protein S31	mrps31	NA
ENSDARG00000057907	30.2223680810569	-0.691145111032389	0.234789750543353	-2.94367667001193	0.00324338647229384	0.0219394902913679	100538306	14.835336	100538306	si:ch73-181d5.4	si:ch73-181d5.4	NA
ENSDARG00000057912	620.240622524413	0.400773744893854	0.0843557434917514	4.75099534785136	2.02417789937747e-06	6.87050239719716e-05	322599	14.541529	322599	eukaryotic translation initiation factor 1A, X-linked, b	eif1axb	NA
ENSDARG00000057929	51.9884921134157	0.900220613050721	0.214110154318334	4.2044741685268	2.61689821524843e-05	0.000555231556527754	568328	14.852479	568328	nuclear assembly factor 1 homolog (S. cerevisiae)	naf1	NA
ENSDARG00000057949	618.733417991734	1.83101014954725	0.288460240267815	6.34753041822086	2.18798726994184e-10	3.15565068754112e-08	556206	14.547449	556206	solute carrier family 43, member 3b	slc43a3b	NA
ENSDARG00000058030	174.827492754766	0.638273651586536	0.166834626785513	3.82578643225617	0.000130355266585352	0.00200667605423321	565232	14.817384	565232	heat shock protein 14	hspa14	NA
ENSDARG00000058038	45.0051756683631	-0.986011682391694	0.203253791517279	-4.85113549435496	1.22756645572737e-06	4.60432433781335e-05	100533983	14.833816	100533983	echinoderm microtubule associated protein like 3	eml3	NA
ENSDARG00000058094	452.057486739897	-0.767761066362758	0.241346021568821	-3.18116313404332	0.00146685004719191	0.0123408946678681	564009	14.546135	564009	circadian associated repressor of transcription a	ciarta	NA
ENSDARG00000058108	207.894097539696	-1.08711251105201	0.187756527443941	-5.79001180865254	7.03814759611441e-09	6.50894336846763e-07	798252	14.833816	798252	EPS8 like 2	eps8l2	NA
ENSDARG00000058115	320.195289169054	-0.492331523890774	0.118688903732667	-4.14808384278024	3.35269622576081e-05	0.000683005166827711	352940	14.543775	352940	fibroblast growth factor receptor 2	fgfr2	NA
ENSDARG00000058180	29.1179254045253	-1.01237644459505	0.376547536826678	-2.68857540040433	0.0071757627944312	0.0388273185594167	563246	14.545337	563246	exocyst complex component 3-like 4	exoc3l4	NA
ENSDARG00000058229	384.806314457873	-0.932724272841201	0.183205242587506	-5.09114400694999	3.55909580643696e-07	1.71786636234995e-05	554842	14.543792	554842	acyl-CoA thioesterase 11a	acot11a	NA
ENSDARG00000058237	26.6436649110301	-0.894424919568001	0.33144852757233	-2.69853339255766	0.00696457503606442	0.0380071290819461	100005603	14.535469	100005603	single stranded DNA binding protein 3a	ssbp3a	NA
ENSDARG00000058285	4534.1379120175	1.13657727295236	0.262293110581518	4.33323342131445	1.46935174179818e-05	0.000350417251021358	449677	14.547449	449677	carnitine palmitoyltransferase 1B (muscle)	cpt1b	NA
ENSDARG00000058292	178.498901753504	1.41105638955305	0.318064039748213	4.43639083082161	9.14796944758925e-06	0.000234804342918525	324947	14.550584	324947	selenophosphate synthetase 1	sephs1	NA
ENSDARG00000058302	155.136088505722	-1.15585411589048	0.151121859989456	-7.64849053585713	2.03352178988218e-14	9.12448758682319e-12	394184	14.5362015	394184	SH3 domain binding glutamate-rich protein like	sh3bgrl	NA
ENSDARG00000058348	93.6363955248216	-0.848770687492379	0.184927250058725	-4.5897545506292	4.43767524686767e-06	0.000131448497838146	406363	14.533042	406363	scinderin like b	scinlb	NA
ENSDARG00000058419	1003.01434628608	-0.420603501916	0.13926278314644	-3.02021467913447	0.00252595575704427	0.0184127280364569	567890	14.838266	567890	GCN1 eIF2 alpha kinase activator homolog	gcn1	NA
ENSDARG00000058462	195.61210479541	-1.78539752651783	0.60066046863443	-2.97239059293654	0.00295490502322538	0.0205739507795261	100009654	14.593284	100009654	zgc:158846	zgc:158846	NA
ENSDARG00000058467	160.784134957134	0.57325308285643	0.140045324726626	4.09333966682173	4.25204129618287e-05	0.000834902436033315	321555	14.809612	321555	PRP40 pre-mRNA processing factor 40 homolog A	prpf40a	NA
ENSDARG00000058494	513.135956968225	0.353233978942889	0.130653908216989	2.70358524871864	0.00685958498155874	0.037620584903388	335894	14.538103	335894	DnaJ (Hsp40) homolog, subfamily A, member 3A	dnaja3a	NA
ENSDARG00000058522	50.281726160234	0.922544991017312	0.22891206137793	4.03012836223691	5.57464021036187e-05	0.00103583997160328	567601	14.546743	567601	SHQ1, H/ACA ribonucleoprotein assembly factor	shq1	NA
ENSDARG00000058574	85.9609750814419	0.85078813784906	0.173046837873565	4.9165194134936	8.80964652761156e-07	3.48787149287628e-05	569858	14.542969	569858	ATP-binding cassette, sub-family G (WHITE), member 2c	abcg2c	NA
ENSDARG00000058606	215.830737366299	-1.38854828822251	0.283451014558654	-4.89872400133949	9.64610271530242e-07	3.76975917406093e-05	553465	14.543792	553465	salt-inducible kinase 1	sik1	NA
ENSDARG00000058690	142.936675993625	-0.643881057528916	0.12786540689754	-5.03561575528292	4.76315182245762e-07	2.1531934451147e-05	100005752	14.595437	100005752	cingulin b	cgnb	NA
ENSDARG00000058696	109.113164209275	-0.69777614636229	0.178932041247718	-3.89967130256047	9.63233668644534e-05	0.00158986047624367	553608	14.592884	553608	transducin (beta)-like 1 X-linked receptor 1a	tbl1xr1a	NA
ENSDARG00000058728	86.1401260481619	0.490790170719986	0.163059638530673	3.00988138537829	0.00261349732021547	0.0188804532107396	436595	14.833816	436595	nudix (nucleoside diphosphate linked moiety X)-type motif 2	nudt2	NA
ENSDARG00000058794	27.4086758880801	-1.2871229417609	0.238583911144961	-5.39484383328288	6.85831761431318e-08	4.26094963576432e-06	503734	14.535469	503734	si:dkey-19a16.2	si:dkey-19a16.2	NA
ENSDARG00000058821	24.0458993651509	0.976639520950057	0.306492518880018	3.18650362011733	0.00144003685609381	0.0121406030004012	561295	14.543792	561295	sema domain, seven thrombospondin repeats (type 1 and type 1-like), transmembrane domain (TM) and short cytoplasmic domain, (semaphorin) 5A	sema5a	NA
ENSDARG00000058824	66.5912348209887	0.408532844050008	0.148686500041828	2.74761221721595	0.00600309622447224	0.0339530862555935	553771	14.5362015	553771	mitochondrial ribosomal protein L4	mrpl4	NA
ENSDARG00000058835	15.9805474053672	-0.979970627700555	0.319259864299544	-3.06950774990339	0.00214411842725224	0.0163268351641489	101886323	14.815489	101886323	pleckstrin homology and RhoGEF domain containing G3	plekhg3	NA
ENSDARG00000058857	78.9749020400756	0.647821147457275	0.195492227735337	3.31379490101424	0.000920389927770932	0.00881464345845442	550358	14.552143	550358	zgc:112052	zgc:112052	NA
ENSDARG00000058861	167.957701586167	0.532233731823547	0.158688835185602	3.35394567110564	0.000796680033693463	0.00796351370313226	336844	14.543775	336844	nicalin	ncln	NA
ENSDARG00000058865	33.4251600191024	0.895896067086596	0.280734018371455	3.19126293380372	0.00141652304917183	0.0120260523761155	100002293	14.566872	100002293	endonuclease G	endog	NA
ENSDARG00000058946	171.403065573616	-0.512473446179977	0.174087044682025	-2.94377704622435	0.00324233481216149	0.0219394902913679	556989	14.815489	556989	myosin-IIIb	LOC556989	NA
ENSDARG00000058962	22.2605402792702	-0.830764843918067	0.24428815000474	-3.4007578505218	0.000671993259799779	0.00701222940781595	641329	14.535469	641329	thioredoxin-like 4B	txnl4b	NA
ENSDARG00000058992	113.390796356664	0.560414507291347	0.192104455285678	2.91723847038298	0.00353145662159081	0.0232899275833276	565295	14.819327	565295	ceramide synthase 2b	cers2b	NA
ENSDARG00000059035	9719.32292508026	0.492976484421275	0.112820201854528	4.36957633755101	1.24487817449383e-05	0.000302845363132384	327556	14.545806	327556	P450 (cytochrome) oxidoreductase b	porb	NA
ENSDARG00000059064	63.3809939459875	-0.906965223874826	0.175840118093495	-5.15789703571848	2.49738881027757e-07	1.31547241028316e-05	792539	14.853864	792539	Ras association (RalGDS/AF-6) domain family member 3	rassf3	NA
ENSDARG00000059075	47.9366055830089	0.802873841837418	0.266209730318859	3.01594476233366	0.00256179924230897	0.0185956847337167	553616	14.566872	553616	NIP7, nucleolar pre-rRNA processing protein	nip7	NA
ENSDARG00000059173	30.6935732072069	-0.622723775623753	0.20353998827752	-3.05946650038463	0.00221731583948036	0.0167265139447725	563287	14.536741	563287	growth differentiation factor 2	gdf2	NA
ENSDARG00000059227	252.950073060045	-3.35115102084577	0.968838975623308	-3.45893497801303	0.000542315808276869	0.00598920329742413	554095	14.852479	554095	fatty acid binding protein 1b, tandem duplicate 1	fabp1b.1	NA
ENSDARG00000059231	102.010328689615	-0.494256214249457	0.129144367726652	-3.8271604325448	0.000129630030513759	0.00199805066116308	561607	14.538123	561607	hephaestin-like 1a	hephl1a	NA
ENSDARG00000059246	343.747028515454	0.402329112211475	0.0989956659840588	4.06410834466493	4.82164266672246e-05	0.000921359635762501	560522	14.536508	560522	heterogeneous nuclear ribonucleoprotein D	hnrnpd	NA
ENSDARG00000059303	212.051969954296	0.792392393971154	0.160481145188435	4.93760430884722	7.90881068715132e-07	3.23128878487328e-05	573096	14.535736	573096	heterogeneous nuclear ribonucleoprotein L2	hnrnpl2	NA
ENSDARG00000059483	64.0279283079025	-0.952541152409894	0.195342264149481	-4.87626759399586	1.08111926367299e-06	4.11879241490512e-05	100006454	14.527806	100006454	TEA domain family member 1b	tead1b	NA
ENSDARG00000059510	91.0280972257598	1.11521019595167	0.209874422575778	5.3137022714095	1.07420075046069e-07	6.22676655111544e-06	100037331	14.545806	100037331	coenzyme Q2 4-hydroxybenzoate polyprenyltransferase	coq2	NA
ENSDARG00000059553	120.191602452913	0.373035192661234	0.119669782345123	3.11720457203986	0.00182574832414631	0.014485226553394	570858	14.82342	570858	symplekin	sympk	NA
ENSDARG00000059629	74.8732232109268	-0.505956540477499	0.194594170307636	-2.60006011319675	0.00932074314364472	0.0469135036083323	569819	14.544415	569819	aspartate beta-hydroxylase domain containing 2	asphd2	NA
ENSDARG00000059634	62.5867636594624	0.614344360765694	0.221356137720107	2.77536628120292	0.00551395687887667	0.0321161478786494	561938	14.545337	561938	THUMP domain containing 3	thumpd3	NA
ENSDARG00000059680	86.8250455358337	-0.580971856258381	0.147148489836062	-3.94820128229412	7.87405885929967e-05	0.00137060665345425	558271	14.592722	558271	fascin actin-bundling protein 1a	fscn1a	NA
ENSDARG00000059700	797.895622478201	-0.715778458723656	0.0913756223088333	-7.83336343586752	4.749887250931e-15	2.50195148021865e-12	556522	14.5362015	556522	agmatine ureohydrolase (agmatinase)	agmat	NA
ENSDARG00000059711	108.10582555984	1.21903722367176	0.323191330795113	3.77187476122176	0.00016202557924993	0.00236217348732798	334362	14.535481	334362	nucleolar protein 6 (RNA-associated)	nol6	NA
ENSDARG00000059725	229.296976052573	0.407630531388416	0.0982723877282429	4.14796608499689	3.35442075330159e-05	0.000683005166827711	100151755	14.809612	100151755	huntingtin interacting protein K	hypk	NA
ENSDARG00000059729	22.4994324952698	-2.90741245010287	0.868233725021617	-3.34865182762911	0.00081205773905472	0.00803108531318199	558964	14.566941	558964	SEC14-like lipid binding 8	sec14l8	NA
ENSDARG00000059789	46.4307549427964	-0.628324376043989	0.210685914472565	-2.98227993844272	0.00286110254297338	0.0201173867139422	ENSDARG00000059789	14.829012	NA	poly (ADP-ribose) polymerase family, member 8	parp8	NA
ENSDARG00000059817	37.5964356004045	-0.501552811466812	0.189993078233044	-2.63984780988501	0.00829432650488572	0.0431250547858291	569130	14.546135	569130	myotubularin related protein 12	mtmr12	NA
ENSDARG00000059824	313.605217078162	2.0664039189217	0.365171450039252	5.65872254991343	1.52503865165482e-08	1.17680530349033e-06	564868	14.54133	564868	sterol O-acyltransferase 2	soat2	NA
ENSDARG00000059846	22.0914622008124	-0.706266085067768	0.266316293778372	-2.65198225406186	0.00800207475181025	0.0420768817787244	569543	14.592884	569543	ectopic P-granules autophagy protein 5 homolog (C. elegans)	epg5	NA
ENSDARG00000059866	117.155363891235	0.446712941141256	0.121928600504062	3.66372565004855	0.000248573030502269	0.00328592801456847	100126813	14.82921	100126813	cactin	cactin	NA
ENSDARG00000059925	135.80685314204	-0.475383518718226	0.131907546508023	-3.60391449392407	0.000313460216445797	0.00394347925466337	325631	14.802482	325631	ubiquitin specific peptidase 24	usp24	NA
ENSDARG00000059933	260.273898074802	0.666242717583547	0.236721954014261	2.81445259421697	0.00488603835532471	0.0294594618980975	557680	14.880765	557680	phospholipid phosphatase 3	plpp3	NA
ENSDARG00000060006	153.9630493587	-1.02577020540651	0.116456887365003	-8.8081540612666	1.27223504283595e-18	1.2844272953298e-15	559634	14.835131	559634	neural precursor cell expressed, developmentally down-regulated 4-like	nedd4l	NA
ENSDARG00000060010	649.004623149526	-0.959860860875421	0.16732362067848	-5.73655325520261	9.66226776489318e-09	8.4824908675131e-07	563030	14.535481	563030	IQ motif containing GTPase activating protein 2	iqgap2	NA
ENSDARG00000060051	164.407198484762	2.35913513266942	0.427728317609705	5.5154990575632	3.47791608310696e-08	2.42154904292189e-06	560024	14.544415	560024	solute carrier family 47 (multidrug and toxin extrusion), member 2.1	slc47a2.1	NA
ENSDARG00000060051	164.407198484762	2.35913513266942	0.427728317609705	5.5154990575632	3.47791608310696e-08	2.42154904292189e-06	560089	15.243732	560089	multidrug and toxin extrusion protein 1-like	mate4	NA
ENSDARG00000060069	39.7665069506859	0.745086327905337	0.220696421324346	3.37606891599897	0.000735294987679456	0.00749839964287593	559897	14.546743	559897	isochorismatase domain containing 1	isoc1	NA
ENSDARG00000060093	49.507822338907	-1.50745487062926	0.296374396992223	-5.08631948618967	3.65078866093684e-07	1.75513113600198e-05	558314	14.595437	558314	death-associated protein kinase 1	dapk1	NA
ENSDARG00000060102	679.263964027244	-0.643990040590296	0.22028524936379	-2.92343696389212	0.00346190313363617	0.0229561885407784	777729	14.815489	777729	KN motif and ankyrin repeat domains 1a	kank1a	NA
ENSDARG00000060113	52.6320584267542	-1.44956821897403	0.255213179823028	-5.67983291450389	1.3482638381674e-08	1.09089606017886e-06	571403	14.545337	571403	zinc finger protein 395a	znf395a	NA
ENSDARG00000060150	166.054063744795	0.489631233821467	0.175294850865732	2.79318663043048	0.00521915704537562	0.0308891488054351	503934	14.592884	503934	proteasome 26S subunit, non-ATPase 11a	psmd11a	NA
ENSDARG00000060184	62.5634237926738	-0.891491280876106	0.180428024372978	-4.9409801164437	7.77308359281001e-07	3.20309209955419e-05	560840	14.82342	560840	protein kinase N1a	pkn1a	NA
ENSDARG00000060197	132.754292048072	-0.33005301621178	0.125669178401036	-2.62636408076539	0.00863024518964752	0.0444727437144107	559574	14.809612	559574	ATPase secretory pathway Ca2+ transporting 1	atp2c1	NA
ENSDARG00000060210	17.1192032569991	-0.830541361589813	0.320830298719255	-2.58872483336303	0.00963320375756547	0.0479483416281453	565889	14.545337	565889	D-2-hydroxyglutarate dehydrogenase	d2hgdh	NA
ENSDARG00000060235	122.688978325849	-0.856675946219395	0.265106499068604	-3.23144075769226	0.00123167852916496	0.0108364454472284	100002448	14.8207245	100002448	macrophage stimulating 1 receptor a	mst1ra	NA
ENSDARG00000060280	17.8275387140529	-2.08272517756689	0.45450353407144	-4.58241800434387	4.59629956974959e-06	0.000135155750697855	799942	14.831473	799942	phosphodiesterase 9A	pde9a	NA
ENSDARG00000060308	60.252085188128	1.20691949577365	0.241665059256747	4.99418285574915	5.90853971204125e-07	2.58418623145775e-05	100536352	14.551187	100536352	URB1 ribosome biogenesis 1 homolog (S. cerevisiae)	urb1	NA
ENSDARG00000060348	38.6620730910406	-0.506728312105767	0.184815624104998	-2.74180451225207	0.00611026946361557	0.0343986591783005	560211	14.824423	560211	mitogen-activated protein kinase kinase kinase 3	map3k3	NA
ENSDARG00000060350	27.334901156283	-1.24983598575049	0.42379487902575	-2.94915311063623	0.00318646067937105	0.0216754470132399	100148022	14.852479	100148022	apolipoprotein Da, duplicate 2	apoda.2	NA
ENSDARG00000060496	24.6989780205093	-1.45410982591478	0.489811385864253	-2.96871381082548	0.00299048973442006	0.0207264205563496	560875	14.82342	560875	calcium channel, voltage-dependent, T type, alpha 1H subunit a	cacna1ha	NA
ENSDARG00000060521	22.6298806303581	-1.01900247153688	0.278629345441126	-3.65719723428125	0.000254988173349504	0.00335780621753178	100332262	14.804419	100332262	RNA binding motif protein 27	rbm27	NA
ENSDARG00000060522	59.7172407361234	0.823796195320089	0.212387669072003	3.87873834163512	0.000104999619718463	0.0016923249067783	560915	14.546743	560915	riboflavin kinase	rfk	NA
ENSDARG00000060542	202.388649122361	-0.491637782089507	0.147379658997031	-3.33585913711072	0.000850362392057685	0.0083072127689859	558825	14.536741	558825	leucine-rich repeat containing G protein-coupled receptor 4	lgr4	NA
ENSDARG00000060559	77.1964394359014	0.782945988186132	0.183684675098305	4.26244588867913	2.0220147106478e-05	0.000450307136387832	100003553	14.82921	100003553	DIS3 exosome endoribonuclease and 3'-5' exoribonuclease	dis3	NA
ENSDARG00000060586	46.1769199431846	-0.89016300025059	0.190216304424702	-4.67974079794492	2.87237824604455e-06	9.15759538179729e-05	323089	14.542969	323089	CTD (carboxy-terminal domain, RNA polymerase II, polypeptide A) small phosphatase like 2b	ctdspl2b	NA
ENSDARG00000060622	22.9499266527241	-1.96288992625112	0.66287538906782	-2.96117484315034	0.0030646790544441	0.0210813968874135	ENSDARG00000060622	14.833816	NA	si:ch73-14h1.2	si:ch73-14h1.2	NA
ENSDARG00000060633	92.3080349569974	0.459386719325536	0.137820324910599	3.33322911278529	0.000858442196564409	0.00836015049146127	569700	14.541529	569700	ubiquitin specific peptidase 16	usp16	NA
ENSDARG00000060646	32.683190013651	0.593506435792578	0.227725844082434	2.60623223588859	0.00915443690412173	0.0464565887772542	570299	14.545337	570299	SUMO1/sentrin specific peptidase 5	senp5	NA
ENSDARG00000060683	16.34965333223	-0.780650970230445	0.268514154894762	-2.90729913488696	0.00364564392341124	0.0237981832921027	562066	14.538103	562066	leucine rich repeat and sterile alpha motif containing 1	lrsam1	NA
ENSDARG00000060705	15.8177248849053	-0.779118687807996	0.298334174534821	-2.61156365683831	0.0090129206822021	0.0458787958255792	564592	14.835131	564592	nuclear receptor binding SET domain protein 1b	nsd1b	NA
ENSDARG00000060734	25.906352707299	-0.724462009414909	0.277147942509545	-2.61399021351189	0.00894915998654098	0.0456501360997659	571540	14.547449	571540	adaptor protein, phosphotyrosine interaction, PH domain and leucine zipper containing 1	appl1	NA
ENSDARG00000060756	28.5655522444899	-1.84630296975433	0.273849468787103	-6.74203597301728	1.5618239897821e-11	3.6347711556988e-09	799085	14.8804035	799085	abhydrolase domain containing 6a	abhd6a	NA
ENSDARG00000060768	25.829080827188	0.69926284330642	0.235793499422102	2.96557303326944	0.00302119602348007	0.0208453792882524	566524	14.535469	566524	ankyrin repeat and IBR domain containing 1a	ankib1a	NA
ENSDARG00000060796	1009.57460358448	0.591476441960676	0.162490003043852	3.64007896412588	0.000272554443371102	0.00353154768068545	558346	14.834426	558346	solute carrier family 20 (phosphate transporter), member 2	slc20a2	NA
ENSDARG00000060813	26.8002362587977	-0.957114321836246	0.250903006865575	-3.81467856361336	0.00013636030821361	0.00208586506819178	571486	14.536508	571486	pleckstrin homology domain containing, family A member 7a	plekha7a	NA
ENSDARG00000060835	19.3986410804833	-0.855145980688661	0.25923650530893	-3.29870972326829	0.000971302941815862	0.00918605397353565	569212	14.538123	569212	tectonin beta-propeller repeat containing 2	tecpr2	NA
ENSDARG00000060962	34.8967333076125	-0.620770432811053	0.234658766300181	-2.64541761042479	0.00815901533559094	0.0426717741000844	565512	14.833017	565512	bloodthirsty-related gene family, member 4	btr04	NA
ENSDARG00000060977	126.507037883761	-0.7544381879276	0.257067134156134	-2.93479051845414	0.00333772937626264	0.022402543708267	767701	14.540007	767701	zgc:153018	zgc:153018	NA
ENSDARG00000060991	129.536098383388	0.430849796850432	0.139848321848462	3.08083637440637	0.00206420049945144	0.0159183889566227	564985	14.852479	564985	mitochondrial elongation factor 1	mief1	NA
ENSDARG00000060992	25.7473651064488	0.89014491959124	0.305124977411607	2.91731252925405	0.00353061815386591	0.0232899275833276	565088	14.535736	565088	RNA pseudouridylate synthase domain containing 2	rpusd2	NA
ENSDARG00000060994	72.3770041206527	-0.488427290025965	0.174265372367683	-2.80277879299756	0.00506644060915568	0.030251319852105	564991	14.831473	564991	F-box and WD repeat domain containing 7	fbxw7	NA
ENSDARG00000061013	82.5632423689614	-0.718592711828249	0.208177381145743	-3.45182895410318	0.000556800575192846	0.00611571982634753	568480	14.368719	568480	ankyrin repeat and FYVE domain containing 1	ankfy1	NA
ENSDARG00000061017	80.8355492803967	0.491148340582629	0.178624752531559	2.74960963484529	0.00596662990189404	0.0338416298040479	568117	14.852479	568117	spinster homolog 2 (Drosophila)	spns2	NA
ENSDARG00000061095	24.9928185863203	0.894146506074253	0.251609506028798	3.55370717182647	0.000379841892237601	0.00455006186237382	566154	14.593083	566154	serine/threonine kinase 36 (fused homolog, Drosophila)	stk36	NA
ENSDARG00000061100	395.581550779796	0.451846349821232	0.170836366793407	2.64490727766209	0.0081713304771157	0.0427073635592134	568332	14.817384	568332	asparaginyl-tRNA synthetase	nars	NA
ENSDARG00000061108	127.125313876335	-0.402498760414124	0.150627926208	-2.67213902857774	0.00753694148098659	0.0402601613942472	565612	14.837396	565612	E1A binding protein p300 b	ep300b	NA
ENSDARG00000061120	144.246244652902	-1.36691383602113	0.292889601935761	-4.66699338927347	3.05639159752032e-06	9.64891710642265e-05	494042	14.547653	494042	solute carrier family 43 (amino acid system L transporter), member 2b	slc43a2b	NA
ENSDARG00000061143	298.462370378943	0.658114009870055	0.167489972909551	3.92927408392057	8.52026814664053e-05	0.00145384575488099	559710	14.566182	559710	transmembrane anterior posterior transformation 1b	tapt1b	NA
ENSDARG00000061145	121.302171305212	0.731020590475458	0.241470305646555	3.02737261427691	0.00246689664429016	0.0181239859585053	777639	14.538123	777639	glucose-fructose oxidoreductase domain containing 2	gfod2	NA
ENSDARG00000061173	34.3321247286039	-0.754856395126906	0.239041302616507	-3.15784923720032	0.00158937732225277	0.0130456004465395	678603	14.541529	678603	suppression of tumorigenicity 14 (colon carcinoma) a	st14a	NA
ENSDARG00000061201	3683.21490620039	0.25588128234627	0.0950755327536754	2.69134734179418	0.00711640593019594	0.0385726278698031	751707	14.543538	751707	acyl-CoA synthetase family member 2	acsf2	NA
ENSDARG00000061204	37.444260389531	0.577070059462905	0.208061178686317	2.77355950353873	0.00554466992837614	0.032248524331386	556273	14.538123	556273	DEAD (Asp-Glu-Ala-Asp) box polypeptide 20	ddx20	NA
ENSDARG00000061222	18.4788769689212	-1.12701351400332	0.336758550247623	-3.34665151983407	0.000817939644883334	0.008076070739822	100001302	14.831809	100001302	ubiquitin-like modifier activating enzyme 7	uba7	NA
ENSDARG00000061233	726.195955780767	0.830056205827336	0.19942792879276	4.16218636402681	3.1521492281431e-05	0.000647774075878419	336147	14.852479	336147	ATP-binding cassette, sub-family C (CFTR/MRP), member 5	abcc5	NA
ENSDARG00000061282	509.933268943833	-0.283108991002223	0.0708860948018235	-3.99385791802626	6.50068270515331e-05	0.00117897860737923	792865	14.827688	792865	golgi glycoprotein 1a	glg1a	NA
ENSDARG00000061335	118.670211675302	-0.684402505653903	0.169561406378796	-4.03631062203485	5.42983165579572e-05	0.00101359646394399	559073	14.831809	559073	UDP-N-acetyl-alpha-D-galactosamine:polypeptide N-acetylgalactosaminyltransferase 1	galnt1	NA
ENSDARG00000061354	76.1051289973912	1.75112287046429	0.451076708724393	3.88209552077365	0.000103560180181753	0.00167756199501527	767722	14.546135	767722	FAD-dependent oxidoreductase domain containing 2	foxred2	NA
ENSDARG00000061355	40.9099263033736	-3.27520798678005	1.0227731429842	-3.20228196178853	0.00136343471964579	0.0117065993114874	555401	14.544415	555401	amine oxidase, copper containing 1	aoc1	NA
ENSDARG00000061362	75.1546793996454	-0.952768226509346	0.21522642282253	-4.42681811096668	9.56333070867975e-06	0.00024340283936062	797682	14.838869	797682	family with sequence similarity 69, member Ab	fam69ab	NA
ENSDARG00000061375	659.958563678632	0.506434513933821	0.145284847543664	3.48580407727389	0.000490660222232808	0.00556066285533253	100037312	14.527583	100037312	sphingosine-1-phosphate lyase 1	sgpl1	NA
ENSDARG00000061409	24.5825886968721	-0.739607448770349	0.275524463754232	-2.68436217493224	0.00726683382437845	0.039267480723615	ENSDARG00000061409	14.833489	NA	basic, immunoglobulin-like variable motif containing	bivm	NA
ENSDARG00000061455	21.673870807139	-1.09099730021399	0.28586415685288	-3.81648861551911	0.000135364317918338	0.0020732474229844	100537389	14.838266	100537389	multidrug and toxin extrusion protein 1-like	LOC100537389	NA
ENSDARG00000061472	93.3421143949658	-0.456352310175616	0.153057768136241	-2.98156908814588	0.00286775332048376	0.0201356732904138	559240	14.536508	559240	glucosidase, beta (bile acid) 2	gba2	NA
ENSDARG00000061486	22.0578992313207	1.14210810646421	0.392722161757153	2.90818348868851	0.00363534966470444	0.0237552649341393	569992	14.854555	569992	si:dkeyp-86b9.1	si:dkeyp-86b9.1	NA
ENSDARG00000061517	45.7571726849778	-0.959344000436643	0.35751888207221	-2.68333799567789	0.00728912810389488	0.0393353171397267	559293	14.82342	559293	low density lipoprotein receptor-related protein 1Bb	lrp1bb	NA
ENSDARG00000061544	77.5875835849128	-0.705527267327176	0.225396175949547	-3.13016520513242	0.00174708019423569	0.0140373820712242	100535437	14.815266	100535437	anoctamin 6	ano6	NA
ENSDARG00000061551	64.6387478256074	-0.658738280140729	0.19107650037362	-3.44751070305699	0.000565777989503944	0.00618070364548267	561339	14.833816	561339	RAP1 GTPase activating protein 2a	rap1gap2a	NA
ENSDARG00000061585	4203.98596894842	-0.57831238269936	0.17389337733552	-3.3256722686082	0.000882055745113211	0.00854205064112434	562008	14.531645	562008	cytochrome P450, family 4, subfamily V, polypeptide 7	cyp4v7	NA
ENSDARG00000061587	65.2960533403264	-0.498762076192829	0.154652283632657	-3.22505471291668	0.00125948596111359	0.0110330241640572	558181	14.804419	558181	CTD (carboxy-terminal domain, RNA polymerase II, polypeptide A) small phosphatase like 2a	ctdspl2a	NA
ENSDARG00000061672	573.917589955311	-0.711704493610122	0.125904415633003	-5.65273656235107	1.57913239776386e-08	1.20321943389366e-06	ENSDARG00000061672	14.838266	NA	si:ch73-334d15.1	si:ch73-334d15.1	NA
ENSDARG00000061737	276.31387090874	0.382041313175512	0.121222892727526	3.15156077024353	0.00162400364481222	0.0132524964764324	777750	14.54133	777750	endothelin converting enzyme 1	ece1	NA
ENSDARG00000061741	11.5800477916105	-1.09601052198084	0.400223126717905	-2.73849872437122	0.00617203998680942	0.0346819408349704	794666	14.527583	794666	inositol 1,4,5-trisphosphate receptor, type 3	itpr3	NA
ENSDARG00000061757	326.884821628517	-0.492855167821101	0.116923572888238	-4.2151907921271	2.49567113052298e-05	0.000533246133091462	555272	14.838266	555272	RAB GTPase activating protein 1-like	rabgap1l	NA
ENSDARG00000061764	326.977198687348	-0.400043099969564	0.106850716046683	-3.74394402555791	0.000181154026607896	0.00257289687263149	ENSDARG00000061764	14.831221	NA	AHNAK nucleoprotein	ahnak	NA
ENSDARG00000061789	108.680947646283	-0.527834816422006	0.154263021054182	-3.42165486462641	0.000622412675044741	0.00666757668510457	568505	14.551187	568505	guanine nucleotide binding protein-like 1	gnl1	NA
ENSDARG00000061836	41.3999907800409	-0.639527258521033	0.204194182947912	-3.13195630398624	0.00173645717051193	0.013979789089901	678521	14.543792	678521	nuclear factor I/Xb	nfixb	NA
ENSDARG00000061858	61.0332637872799	-4.07842418557646	1.0840930413084	-3.76206103182269	0.000168518910270055	0.00242512831391298	768292	14.809612	768292	zgc:153968	zgc:153968	NA
ENSDARG00000061862	203.252110639963	-0.570439391435961	0.110762743054112	-5.15010170123071	2.6034524926485e-07	1.35787388572502e-05	ENSDARG00000061862	14.823164	NA	myosin XVIIIAb	myo18ab	NA
ENSDARG00000061865	114.916064568711	0.788347827367504	0.165134550716092	4.7739726419995	1.80626929885048e-06	6.28820475734872e-05	569118	14.879544	569118	DEAD (Asp-Glu-Ala-Asp) box polypeptide 10	ddx10	NA
ENSDARG00000061889	40.4996249553326	0.6808767989287	0.201190538412877	3.38423866400431	0.000713759306225594	0.00731716932375023	561272	14.547449	561272	phosphopantothenoylcysteine synthetase	ppcs	NA
ENSDARG00000061890	48.3479998564268	-0.918727202075483	0.20473497875544	-4.48739735466953	7.2098529151328e-06	0.000193246389528393	568666	14.535469	568666	ATPase 13A2	atp13a2	NA
ENSDARG00000061896	2639.41012750014	0.704745416442116	0.184112515239451	3.82779745051849	0.000129295086128286	0.00199797189852575	100038802	14.549713	100038802	solute carrier organic anion transporter family, member 2A1	slco2a1	NA
ENSDARG00000061901	49.0040256320213	-0.530792694223884	0.176434101212178	-3.00844729322229	0.00262586345426491	0.0189463909643802	556837	14.535481	556837	ankyrin repeat domain 13A	ankrd13a	NA
ENSDARG00000061918	43.8468174799121	-0.808331337734168	0.197720745353834	-4.08824747391887	4.34644342823953e-05	0.000847941419212913	556701	14.55516	556701	complexin 2	cplx2	NA
ENSDARG00000061952	437.597113262986	1.05682499983325	0.232708976681391	4.54140194720627	5.58813748128362e-06	0.000156454110210281	563777	14.533042	563777	KIAA0368 ortholog	kiaa0368	NA
ENSDARG00000061985	74.2341661074444	-0.985786586989633	0.327612706716146	-3.00899985495297	0.00262109241033573	0.0189240372772451	562991	14.833816	562991	RNA binding motif protein 47	rbm47	NA
ENSDARG00000062003	112.205087188321	-0.666410193654094	0.190930661402678	-3.4903256960317	0.000482432204112107	0.00548280126906021	567402	14.809612	567402	myosin VB	myo5b	NA
ENSDARG00000062080	15.6708736669275	-1.52840860222873	0.358210382121709	-4.26679035145726	1.98305352606878e-05	0.000443260027090835	562011	14.543792	562011	SHC (Src homology 2 domain containing) transforming protein 2	shc2	NA
ENSDARG00000062123	28.9605323572801	-0.997414188875772	0.220906923817837	-4.5150879458095	6.3290495001333e-06	0.000173627058593194	100148154	14.538103	100148154	ArfGAP with GTPase domain, ankyrin repeat and PH domain 1	agap1	NA
ENSDARG00000062137	41.3127712796583	-0.675157295801524	0.201036201347131	-3.35838665512647	0.000783988658022492	0.0078952806250561	563669	14.831455	563669	stromal antigen 1b	stag1b	NA
ENSDARG00000062139	75.6301377503264	-0.561159646353775	0.20940778249378	-2.67974589898751	0.0073678065871	0.0396436137472657	559564	14.833816	559564	eukaryotic translation initiation factor 2-alpha kinase 3	eif2ak3	NA
ENSDARG00000062178	76.3477260318705	-0.662950402012987	0.211675208404694	-3.13192275566592	0.00173665559886925	0.013979789089901	566573	14.552143	566573	RHO family interacting cell polarization regulator 1	ripor1	NA
ENSDARG00000062190	94.7324645678453	-0.976679930808112	0.13953011803476	-6.99977857515179	2.56367353257971e-12	7.05884201072799e-10	ENSDARG00000062190	14.815489	NA	phosphodiesterase 3B	PDE3B	NA
ENSDARG00000062192	114.742486603327	-0.541394041801066	0.210474114287006	-2.57225950865774	0.0101037125107704	0.0497992176842895	566657	14.593083	566657	si:dkey-110k5.6	si:dkey-110k5.6	NA
ENSDARG00000062220	28.883619583123	-0.663160703092577	0.197876257646409	-3.35139097019713	0.000804066943084601	0.00799119853607051	100005106	14.838869	100005106	pleckstrin homology domain containing, family A member 7b	plekha7b	NA
ENSDARG00000062222	12.3512396165772	-0.968168481986286	0.341036311295892	-2.83890145981047	0.00452691342567131	0.0278965507699992	562784	14.531645	562784	matrix-remodelling associated 8a	mxra8a	NA
ENSDARG00000062310	33.583530548175	-0.646030718126608	0.230457753006703	-2.80325009550804	0.0050590422082421	0.0302220396217224	ENSDARG00000062310	14.82342	NA	WD repeat domain 26a	wdr26a	NA
ENSDARG00000062330	217.277928404769	-0.353502162954853	0.125544871444106	-2.81574355757126	0.00486644942661904	0.0293757024431937	564367	14.544415	564367	si:ch211-233a24.2	si:ch211-233a24.2	NA
ENSDARG00000062352	198.342135245955	0.677828844927766	0.155711041911048	4.35311996251998	1.34213659360036e-05	0.00032326013581448	571290	14.829012	571290	sema domain, immunoglobulin domain (Ig), transmembrane domain (TM) and short cytoplasmic domain, (semaphorin) 4Ab	sema4ab	NA
ENSDARG00000062420	41.937716090419	-1.86159170803109	0.203369079561652	-9.15375981463662	5.49857378981386e-20	7.40169127373277e-17	556665	14.547653	556665	nuclear factor I/A	nfia	NA
ENSDARG00000062425	54.3866458863582	0.492336018062873	0.183967073746765	2.6762181298844	0.00744581673978267	0.0399505487756586	777620	14.595437	777620	zgc:153521	zgc:153521	NA
ENSDARG00000062460	103.468559325626	0.879674707572119	0.158346654614245	5.55537286035585	2.77019788302605e-08	1.99767543767027e-06	564523	14.540007	564523	serum/glucocorticoid regulated kinase family, member 3	sgk3	NA
ENSDARG00000062467	378.930209821997	0.316675035065962	0.107229899579878	2.95323446451672	0.00314463018273419	0.0214753070258313	100000104	14.546743	100000104	STRA6-like	stra6l	NA
ENSDARG00000062552	77.6375114316402	-0.971399408933797	0.273511693774847	-3.55158273318085	0.000382921587444137	0.0045750444101437	571773	14.804419	571773	lysophosphatidic acid receptor 6a	lpar6a	NA
ENSDARG00000062553	30.0517831794853	-1.4079237316084	0.262620928359748	-5.36104925225065	8.27399532120707e-08	4.91369869198155e-06	678555	14.809612	678555	BTB and CNC homology 1, basic leucine zipper transcription factor 1 a	bach1a	NA
ENSDARG00000062577	451.415502222188	-0.457750560659434	0.12131275118428	-3.77330953416503	0.000161096214588526	0.00235425891404101	100004299	14.829012	100004299	Rho GTPase activating protein 35a	arhgap35a	NA
ENSDARG00000062612	118.520556578376	0.695301782397784	0.191975534321829	3.62182496250889	0.000292532036794339	0.00374237130492441	100009635	14.854555	100009635	DEAH (Asp-Glu-Ala-His) box polypeptide 37	dhx37	NA
ENSDARG00000062650	45.6064703085521	-0.834903440035411	0.178224134116313	-4.68457004532581	2.80548215912124e-06	8.96791988331234e-05	567001	14.544127	567001	replication timing regulatory factor 1	rif1	NA
ENSDARG00000062688	44.6495823322719	-1.30694654081976	0.324808332681055	-4.02374695880451	5.7279459945761e-05	0.00106004726123861	563348	14.842841	563348	glycoprotein (transmembrane) nmb	gpnmb	NA
ENSDARG00000062749	77.459813887773	0.528995131502787	0.164085869574303	3.22389205648961	0.00126461058718987	0.0110494650734966	768122	14.54133	768122	INO80 complex subunit B	ino80b	NA
ENSDARG00000062795	293.601749563369	0.309454181324449	0.118056469717965	2.62123865014538	0.00876109080369126	0.0449454930079766	566515	14.804419	566515	ATP-binding cassette, sub-family B (MDR/TAP), member 7	abcb7	NA
ENSDARG00000062831	191.315367177975	-0.39685157348451	0.143252612165204	-2.77029205601394	0.0056006048970257	0.0323987253339691	560816	14.8804035	560816	si:ch73-22o12.1	si:ch73-22o12.1	NA
ENSDARG00000062834	75.9008758249609	0.619005500374337	0.2222119928399	2.78565298147665	0.00534200261661202	0.0313596990214328	569243	14.531645	569243	ECSIT signalling integrator	ecsit	NA
ENSDARG00000062915	177.111147228907	0.646625639494921	0.136091592158797	4.75140035646295	2.02012702850326e-06	6.87050239719716e-05	562329	14.879544	562329	polymerase (RNA) III (DNA directed) polypeptide B	polr3b	NA
ENSDARG00000062972	204.236377291474	-0.422118381879489	0.0991930866083502	-4.25552219728945	2.08561670777893e-05	0.000461081138955142	793823	14.540007	793823	huntingtin interacting protein 1	hip1	NA
ENSDARG00000062983	97.1177677525753	0.336955781799108	0.130727797927548	2.57753734967566	0.00995071271040189	0.0492454593490682	567995	14.550584	567995	F-box protein, helicase, 18	fbxo18	NA
ENSDARG00000062998	658.748924400155	0.944635692776655	0.175972809065722	5.36807758989547	7.95803190740895e-08	4.79659485364475e-06	568634	14.817384	568634	peptidoglycan recognition protein 2	pglyrp2	NA
ENSDARG00000063014	79.4014821705039	-1.28224857034942	0.266702427042581	-4.80778740774153	1.52609926774334e-06	5.47002740494396e-05	565056	14.542969	565056	D site albumin promoter binding protein a	dbpa	NA
ENSDARG00000063037	178.874841216793	0.351983975860271	0.121091508707074	2.90676018177076	0.00365193056251708	0.0238122383018807	568368	14.55516	568368	lipase, hormone-sensitive a	lipea	NA
ENSDARG00000063062	69.549118219446	0.434049842073708	0.157560179505608	2.75481941843217	0.00587245372237578	0.033432695886552	555525	14.535481	555525	ubinuclein 2a	ubn2a	NA
ENSDARG00000063145	72.0611252713269	0.393606762486054	0.150297327845467	2.61885402840132	0.00882256911308309	0.0451755810672027	571106	14.552193	571106	transcription factor A, mitochondrial	tfam	NA
ENSDARG00000063167	500.293022533228	0.801462930588975	0.249258174023917	3.21539276987591	0.0013026615243987	0.0112807322145034	563589	14.535481	563589	choline kinase beta	chkb	NA
ENSDARG00000063195	358.455853872355	-0.565792267524462	0.149487282104679	-3.78488564082838	0.000153779276114637	0.00228642003594795	557065	14.591863	557065	PX domain containing serine/threonine kinase	pxk	NA
ENSDARG00000063258	32.8407111424961	-0.995670669534428	0.200908190043431	-4.95584908369933	7.20150989805489e-07	3.01890285172786e-05	101884332	14.536741	101884332	regulatory factor X, 5	rfx5	NA
ENSDARG00000063268	36.8232461350686	-0.660206461133829	0.221482518488341	-2.98085133598742	0.00287448298961143	0.0201646562936552	100001920	14.880765	100001920	si:ch211-197g18.2	si:ch211-197g18.2	NA
ENSDARG00000063297	31.1126410306242	-0.779723636475195	0.212356579272664	-3.6717658531975	0.000240880326344128	0.00322450976639795	564067	14.802482	564067	ATP-binding cassette, sub-family B (MDR/TAP), member 6a	abcb6a	NA
ENSDARG00000063309	63.7261323065874	-0.529277042129813	0.168546127534786	-3.14025038647402	0.00168803491843215	0.013697617573212	565446	14.545415	565446	tight junction protein 2a (zona occludens 2)	tjp2a	NA
ENSDARG00000063313	78.1417599239141	-1.14977338695384	0.190902876088474	-6.02281856885685	1.71405549291266e-09	1.92891466856494e-07	569736	14.546301	569736	phospholipase B domain containing 1	plbd1	NA
ENSDARG00000063352	27.1340063879293	-1.28482839557128	0.226266299301877	-5.67839046086621	1.359680603277e-08	1.09089606017886e-06	664741	14.536508	664741	inositol polyphosphate-4-phosphatase type I Aa	inpp4aa	NA
ENSDARG00000063370	66.8564106837123	-0.811881175298457	0.298001513133529	-2.72441964056292	0.00644146037259833	0.0358138101945979	570956	14.545806	570956	serum/glucocorticoid regulated kinase 2a	sgk2a	NA
ENSDARG00000063445	46.7881173605716	-0.803077856869781	0.246451171566866	-3.25856782000281	0.0011197610814223	0.0101162606274655	751727	14.543775	751727	synaptosomal-associated protein, 47	snap47	NA
ENSDARG00000063466	68.7890105369386	0.400983608932234	0.141521005497357	2.83338581098282	0.00460577600126137	0.0282526462052058	570205	14.538103	570205	ISY1 splicing factor homolog	isy1	NA
ENSDARG00000063572	628.330688602044	0.34045664010292	0.129310720400199	2.63285703651834	0.00846699787312128	0.0437949166919937	494479	14.547449	494479	PERP, TP53 apoptosis effector	perp	NA
ENSDARG00000063580	79.2167377062602	-0.504456819385216	0.154370048024641	-3.26784130626618	0.00108371111697955	0.00991592414433365	571989	14.595437	571989	protein phosphatase 1 regulatory subunit 9A-like A	ppp1r9ala	NA
ENSDARG00000063612	66.5557991605667	-0.429880514998587	0.141481397545908	-3.0384242907913	0.00237818853805531	0.0176650853087309	563907	14.8804035	563907	anthrax toxin receptor 1c	antxr1c	NA
ENSDARG00000063627	112.217180902908	0.808959521033872	0.134327308264301	6.02230128398144	1.71954423611236e-09	1.92891466856494e-07	777627	14.540007	777627	block of proliferation 1	bop1	NA
ENSDARG00000063635	2469.94004985667	-0.929118737780534	0.25749034700972	-3.6083633758335	0.00030813471100498	0.00389265070263329	555686	14.55516	555686	neurexin 1b	nrxn1b	NA
ENSDARG00000063661	33.5877505312215	-1.05097882169155	0.222221570996952	-4.72941855723792	2.25163755492921e-06	7.49411785108994e-05	560275	14.804419	560275	NUAK family, SNF1-like kinase, 2	nuak2	NA
ENSDARG00000063663	47.0992338498382	0.555114470335242	0.175600814467299	3.16122947390211	0.00157104676485633	0.0129389745453667	565621	14.593284	565621	cleavage and polyadenylation factor I subunit 1	clp1	NA
ENSDARG00000063665	112.945009176542	-0.554614956647175	0.168835421327508	-3.28494431018316	0.00102002530741475	0.00952049815048515	678634	14.536741	678634	methionine adenosyltransferase II, alpha-like	mat2al	NA
ENSDARG00000063914	5866.07348651097	-0.210393531346388	0.0765707149715153	-2.74770232228673	0.00600144688505264	0.0339530862555935	140533	14.852479	140533	NADH dehydrogenase subunit 3	ND3	NA
ENSDARG00000067630	124.076200293221	0.939328861871199	0.240949644099984	3.89844469528005	9.68125052790491e-05	0.00159359171393435	556929	14.536741	556929	zgc:154075	zgc:154075	NA
ENSDARG00000067658	29.1255584031489	0.612143690227057	0.230479054634603	2.65596234415981	0.00790824444634085	0.0416695421906069	100150296	14.823151	100150296	uncharacterized LOC100150296	LOC100150296	NA
ENSDARG00000067796	421.332541187555	0.568604897984714	0.203537835236245	2.79360786816239	0.00521236418606112	0.0308640235161928	100332309	14.880964	100332309	caseinolytic mitochondrial matrix peptidase chaperone subunit b	clpxb	NA
ENSDARG00000067801	32.9918449194702	-1.1407739373399	0.207480764622382	-5.49821541007003	3.83654094710807e-08	2.6112187401244e-06	ENSDARG00000067801	14.823884	NA	semaphorin 4D	SEMA4D	NA
ENSDARG00000067838	62.234629045899	0.573582280385929	0.195042486054429	2.94080685695251	0.00327358581465439	0.0221039228265231	560815	14.546743	560815	ribosomal oxygenase 1	riox1	NA
ENSDARG00000067848	25.1413207547457	-5.32082067023724	1.32727113082266	-4.00884231312958	6.10171419182904e-05	0.00111665056546841	447879	14.592884	447879	nicotinamide riboside kinase 2	nmrk2	NA
ENSDARG00000067851	961.51582704799	0.712500664459512	0.136387360984486	5.22409598159582	1.75007989685557e-07	9.68137805954578e-06	751703	14.799049	751703	lipocalin 15	lcn15	NA
ENSDARG00000067920	31.7806068849734	-1.15520538543004	0.21728108296364	-5.31664040731679	1.05700665131487e-07	6.15655556763443e-06	571897	14.55516	571897	RAB8A, member RAS oncogene family	rab8a	NA
ENSDARG00000067979	58.0573657450455	0.63324189541735	0.183935407848407	3.44274059478121	0.000575851385274601	0.00625689644179533	565198	14.82342	565198	general transcription factor IIIC, polypeptide 5	gtf3c5	NA
ENSDARG00000067996	114.188517918389	-0.791659457921718	0.180776275112289	-4.37922209333045	1.19103701768178e-05	0.000292685871586506	556454	14.540007	556454	C-terminal Src kinase	csk	NA
ENSDARG00000068006	206.009654802621	3.9356081052307	1.15788544789073	3.39896154010747	0.000676422274586231	0.00704630770130025	751668	14.547653	751668	glucokinase (hexokinase 4)	gck	NA
ENSDARG00000068088	383.528411057879	-2.12398588116966	0.816459114475761	-2.60146018767082	0.00928278389622085	0.0468461688527763	566714	14.593284	566714	transcobalamin like	tcnl	NA
ENSDARG00000068152	91.1844962662405	-0.676000915383827	0.195816099355681	-3.4522233749327	0.000555987242606365	0.00611410394178574	571242	14.82921	571242	MALT paracaspase 3	malt3	NA
ENSDARG00000068219	16.2664045311803	-1.05005533451645	0.320616117541635	-3.27511711690567	0.0010561817741873	0.0097305263834822	797513	14.823884	797513	UDP-GlcNAc:betaGal beta-1,3-N-acetylglucosaminyltransferase 2, like	b3gnt2l	NA
ENSDARG00000068220	34.4969138145544	-2.22189076992788	0.547817197890591	-4.05589816910354	4.99420157641102e-05	0.000946866230019084	100008009	14.799049	100008009	mannose binding lectin 2	mbl2	NA
ENSDARG00000068256	105.057278535302	0.535641232583992	0.150459230769687	3.5600423439883	0.00037079499928706	0.00447929202527282	449812	14.552143	449812	RWD domain containing 4	rwdd	NA
ENSDARG00000068262	519.57665266596	0.742251476428093	0.188661897470263	3.93429455751704	8.34414039451149e-05	0.00143185921925647	325484	14.593083	325484	vesicle-associated membrane protein 5	vamp5	NA
ENSDARG00000068290	90.7130251280051	-0.73050966027665	0.211610364524249	-3.45214499260947	0.000556148786120338	0.00611410394178574	790965	14.55516	790965	si:dkey-286h2.3	si:dkey-286h2.3	NA
ENSDARG00000068374	1160.94350480938	-1.10823853041545	0.346173099074056	-3.20139991634176	0.00136761575885114	0.0117253907066122	564531	14.591863	564531	si:ch211-132b12.7	si:ch211-132b12.7	NA
ENSDARG00000068432	1177.11506688495	0.385154746336447	0.128397856338093	2.99969763764803	0.00270247732732431	0.0192438655705956	797705	14.831221	797705	si:dkey-56m19.5	si:dkey-56m19.5	NA
ENSDARG00000068515	89.05791222445	-2.42641521835026	0.471192320387464	-5.1495219963581	2.61151147646661e-07	1.35787388572502e-05	322468	14.535469	322468	chitin synthase 1	chs1	NA
ENSDARG00000068572	334.875673448	-0.834420387828442	0.271234303396254	-3.07638221781046	0.00209529064986785	0.0160864678220209	368274	14.55516	368274	solute carrier family 16 (monocarboxylate transporter), member 1b	slc16a1b	NA
ENSDARG00000068586	25.5102587658932	-3.8127444203115	1.3258193382255	-2.8757646765166	0.00403050074413756	0.0255597588138969	ENSDARG00000068586	14.546135	NA	cadherin related family member 2	CDHR2	NA
ENSDARG00000068621	258.512049817963	-0.414333803670476	0.14522256279199	-2.85309524707912	0.00432956426268383	0.02694025220463	100536895	14.802482	100536895	si:ch211-181d7.3	si:ch211-181d7.3	NA
ENSDARG00000068637	406.703635369067	-0.511999569083976	0.175778639128357	-2.91275192266169	0.00358259090808494	0.0235247094045794	798456	14.824423	798456	si:ch211-281l24.3	si:ch211-281l24.3	NA
ENSDARG00000068681	49.007199545967	0.529619282705655	0.195875613901891	2.703855125993	0.00685401648802279	0.0376070696342374	569454	14.592722	569454	cytokine receptor family member b1	crfb1	NA
ENSDARG00000068894	287.724775379154	0.424599639499258	0.160367365941903	2.64766860143529	0.0081048933464689	0.0424700618047019	100001853	14.823884	100001853	nuclear receptor interacting protein 1b	nrip1b	NA
ENSDARG00000068912	25.6074146224896	-1.09092366643695	0.257878841963326	-4.23037290741402	2.33304228340862e-05	0.000505631614731583	777626	14.5362015	777626	zgc:153012	zgc:153012	NA
ENSDARG00000068993	308.357266217679	1.1002120742502	0.319256861327953	3.44616579162576	0.000568601401144106	0.00619478954573817	751714	14.802482	751714	zgc:153631	zgc:153631	NA
ENSDARG00000069006	200.273089825857	-1.64719616322493	0.258121146243795	-6.38148476866422	1.75379168297798e-10	2.65589827990977e-08	100007463	14.546135	100007463	transducin-like enhancer of split 3b	tle3b	NA
ENSDARG00000069029	58.4475134041759	-1.44048574652034	0.297965252099023	-4.83440849687271	1.33542112520149e-06	4.88780269843386e-05	ENSDARG00000069029	14.830651	NA	acyl-CoA synthetase short-chain family member 2 like	acss2l	NA
ENSDARG00000069082	37.4864697849792	0.705316230720849	0.195605458712701	3.60581057074074	0.000311180079049299	0.00391886346952417	792923	14.595437	792923	RNA methyltransferase like 1b	rnmtl1b	NA
ENSDARG00000069095	61.0923501266745	-1.53416863317502	0.419936097891385	-3.65333830761037	0.00025885281684107	0.00339394142427442	100006303	14.823151	100006303	glutaminase 2a (liver, mitochondrial)	gls2a	NA
ENSDARG00000069114	158.315978585279	-0.601822188417937	0.167804017810928	-3.58645875271018	0.000335199055935964	0.00415653691163174	100000934	14.546743	100000934	unc-93 homolog B1, TLR signaling regulator	unc93b1	NA
ENSDARG00000069139	77.3028521927684	1.69183644599133	0.446539531530234	3.78877193737724	0.000151393814052201	0.00226436550276842	798001	14.546301	798001	glutamate receptor, ionotropic, kainate 1a	grik1a	NA
ENSDARG00000069169	16.8311797072163	-1.36737982411319	0.307241436266155	-4.45050589767672	8.56682408536009e-06	0.00022271904247669	558496	14.566872	558496	ceramide kinase	cerk	NA
ENSDARG00000069175	309.673743685488	0.312036173750311	0.0981520418949054	3.1791103651661	0.00147727831530848	0.0123856240760985	393880	14.541529	393880	vacuolar protein sorting 4b homolog B (S. cerevisiae)	vps4b	NA
ENSDARG00000069208	72.9468567563095	-0.452814653842052	0.139820282974908	-3.23854768569816	0.00120139935598368	0.0106551633951261	562669	14.82921	562669	syntaxin 7-like	stx7l	NA
ENSDARG00000069244	46.260227407839	-0.541454788644972	0.190947916760959	-2.83561506105772	0.0045737536459732	0.0281131534352944	557230	14.545806	557230	si:ch211-244b2.3	si:ch211-244b2.3	NA
ENSDARG00000069244	46.260227407839	-0.541454788644972	0.190947916760959	-2.83561506105772	0.0045737536459732	0.0281131534352944	100141365	15.239282	100141365	si:ch211-244b2.2	si:ch211-244b2.2	NA
ENSDARG00000069264	22.6262896130754	-0.808627712167876	0.306677643477378	-2.63673511704	0.00837081678134547	0.0433571805498078	561595	14.823151	561595	si:ch211-196h16.5	si:ch211-196h16.5	NA
ENSDARG00000069287	29.6239305005996	0.897134939322158	0.237034237212713	3.78483273079692	0.000153811995814905	0.00228642003594795	393237	14.535481	393237	IMP3, U3 small nucleolar ribonucleoprotein, homolog (yeast)	imp3	NA
ENSDARG00000069292	2378.95490632925	0.937661174801044	0.143030184353908	6.55568738190909	5.53861523891808e-11	1.01667156999231e-08	402867	14.833097	402867	acyl-CoA thioesterase 16	acot16	NA
ENSDARG00000069293	21261.0308670391	0.426748531769303	0.121805803710863	3.50351558602495	0.000459159784315457	0.00526151238129905	567406	14.527806	567406	alpha-2-HS-glycoprotein 2	ahsg2	NA
ENSDARG00000069422	123.093889284594	0.884679270562742	0.183951564585456	4.80930549602235	1.51455586973048e-06	5.44476093821508e-05	100003787	14.799049	100003787	NHP2 ribonucleoprotein homolog (yeast)	nhp2	NA
ENSDARG00000069425	12.1387842127405	-1.04481218092369	0.334211346273828	-3.12620200532524	0.00177079868804054	0.0141886416042402	541432	14.804419	541432	heat shock factor binding protein 1a	hsbp1a	NA
ENSDARG00000069432	129.16598361591	-1.14374271280197	0.176440268543867	-6.4823224439698	9.03213491867382e-11	1.51978214638519e-08	405802	14.817384	405802	phospholipid scramblase 3b	plscr3b	NA
ENSDARG00000069433	79.1852447055956	-0.664438016127108	0.204739838785485	-3.24527957073987	0.00117335366230963	0.0104886684712321	565029	14.55516	565029	tyrosine kinase, non-receptor, 1	tnk1	NA
ENSDARG00000069478	52.694259079134	2.54848104957924	0.748392682491724	3.40527253833407	0.00066098052023253	0.0069511970508829	405838	14.593284	405838	solute carrier family 13 (sodium-dependent dicarboxylate transporter), member 3	slc13a3	NA
ENSDARG00000069497	61.9531988762208	0.657268982525948	0.168093899306132	3.91012990500586	9.22464976661446e-05	0.00154153612081877	449807	14.541529	449807	sulfatase modifying factor 2	sumf2	NA
ENSDARG00000069498	104.37363776315	1.25988133537833	0.294617230340091	4.27633283336479	1.89997103884249e-05	0.000430129931969896	554046	14.540007	554046	phosphorylase kinase, gamma 1b (muscle)	phkg1b	NA
ENSDARG00000069527	241.755904783487	0.400340789511311	0.153245163376432	2.61242039024691	0.00899036280210345	0.0458024580939795	100000479	14.533042	100000479	ubiquitin-conjugating enzyme E2G 1b (UBC7 homolog, yeast)	ube2g1b	NA
ENSDARG00000069538	37.2909350635988	0.569722903345343	0.206800967733351	2.7549334492474	0.00587040747966184	0.033432695886552	568510	14.839825	568510	general transcription factor IIIC, polypeptide 4	gtf3c4	NA
ENSDARG00000069563	80.092426862952	-0.712084961336145	0.199117197312344	-3.57621024676808	0.000348611315928552	0.00427472276566236	751646	14.550584	751646	zgc:153151	zgc:153151	NA
ENSDARG00000069595	19.8811627624409	-0.830606017282551	0.280512034437787	-2.9610352331132	0.00306606861870596	0.0210813968874135	560699	14.802482	560699	si:ch211-214c7.4	si:ch211-214c7.4	NA
ENSDARG00000069603	107.641624303168	-0.455234727534865	0.13580402241569	-3.35214465254507	0.000801881090068064	0.00798492566355481	100004576	14.819327	100004576	TAO kinase 1a	taok1a	NA
ENSDARG00000069630	3527.72078260091	-0.727301654570143	0.262900974025966	-2.76644716614215	0.00566707669983914	0.0326625281724792	561410	14.802482	561410	tyrosine aminotransferase	tat	NA
ENSDARG00000069708	127.148856455834	0.614769870287222	0.138800382283583	4.42916554099388	9.45983927981846e-06	0.000241784710706752	393933	14.852479	393933	cell division cycle 34 homolog (S. cerevisiae) a	cdc34a	NA
ENSDARG00000069733	544.523973373502	0.312462358674372	0.103476074181094	3.01965803348444	0.00253060232938016	0.0184355064464465	562867	14.546301	562867	mitochondrial antiviral signaling protein	mavs	NA
ENSDARG00000069752	1297.52857188148	0.636177922300556	0.191573394985966	3.3208051793787	0.000897581683907228	0.00865606086261229	564694	14.545337	564694	creatine kinase, brain a	ckba	NA
ENSDARG00000069829	174.401608069927	0.404926579506689	0.133332744671317	3.03696275438481	0.00238974982177679	0.0177397009888468	573492	14.535736	573492	Ras-related GTP binding Ca	rragca	NA
ENSDARG00000069843	93.5741027035711	0.999560948957123	0.276579939562445	3.61400378689231	0.000301504653989838	0.00382453151413307	373865	14.535469	373865	potassium channel tetramerisation domain containing 12.1	kctd12.1	NA
ENSDARG00000069910	118.071069532009	0.348925513448857	0.123959970990799	2.814824097327	0.00488039391293002	0.0294452053063482	415217	14.542969	415217	general transcription factor IIF, polypeptide 2a	gtf2f2a	NA
ENSDARG00000069934	58.792054092946	-0.883262121199731	0.260625189424694	-3.38901286997412	0.000701447181864541	0.00722621820432731	558045	14.832098	558045	poly (ADP-ribose) polymerase family, member 4	parp4	NA
ENSDARG00000069937	133.017341406544	-0.390795614525569	0.134499821561492	-2.90554745715332	0.00366611249720495	0.0238661756602031	559334	14.799049	559334	dynamin 2a	dnm2a	NA
ENSDARG00000069940	160.099398976765	-0.652863668996053	0.138509068613834	-4.71350847659114	2.43487591222453e-06	7.95108400986528e-05	559124	14.547449	559124	phosphatidic acid phosphatase type 2D	ppap2d	NA
ENSDARG00000069956	389.38693593153	-0.59987747225803	0.208422368347423	-2.8781818238342	0.00399974532511182	0.025436700584635	560322	14.593284	560322	PDZ and LIM domain 2 (mystique)	pdlim2	NA
ENSDARG00000069968	89.5711405551645	0.484221144771755	0.154462691345466	3.13487445125995	0.001719276756574	0.0138767740878708	100009656	14.535469	100009656	proprotein convertase subtilisin/kexin type 7	pcsk7	NA
ENSDARG00000069980	394.488255623928	0.646894928994635	0.233876516659701	2.76596786301504	0.00567541275360342	0.0326950192629127	559775	14.817384	559775	lectin, mannose-binding, 1	lman1	NA
ENSDARG00000069995	33.8593725518367	-1.10510397687445	0.218093925203367	-5.06710113930945	4.03919695567997e-07	1.88937726324567e-05	368327	14.547653	368327	dpy-19-like 1, like (H. sapiens)	dpy19l1l	NA
ENSDARG00000069996	59.5990016699017	0.488716868050327	0.151110872197509	3.23416085780745	0.00122000720397211	0.0107650307910576	ENSDARG00000069996	14.82419	NA	DnaJ (Hsp40) homolog, subfamily B, member 14	dnajb14	NA
ENSDARG00000069998	56.486863583769	-0.553135914047159	0.206643407838433	-2.67676535067422	0.00743366761582354	0.0399374204725952	100317105	14.853864	100317105	si:ch211-145b13.6	si:ch211-145b13.6	NA
ENSDARG00000070000	19.4041911834381	-3.88010307065279	1.23068368189679	-3.15280289137545	0.00161710958694401	0.0132284150208148	ENSDARG00000070000	14.823151	NA	thioredoxin interacting protein b	txnipb	NA
ENSDARG00000070029	2080.23151571565	-0.61020818972141	0.123108190893146	-4.95668229135989	7.17070887757927e-07	3.01642840457892e-05	100000859	14.547653	100000859	enoyl-CoA, hydratase/3-hydroxyacyl CoA dehydrogenase	ehhadh	NA
ENSDARG00000070057	33.0332370874971	-1.05455598175083	0.345889593111719	-3.04882252242328	0.00229740160843243	0.0171914888734768	100149419	14.536508	100149419	si:dkey-69o16.5	si:dkey-69o16.5	NA
ENSDARG00000070094	91.2012243762966	-0.553903936785904	0.143847727588192	-3.85062695165838	0.000117815840045547	0.00185609740201795	777759	14.533042	777759	synaptotagmin-like 1	sytl1	NA
ENSDARG00000070108	55.6767819228817	-0.530643400065063	0.176922500301086	-2.99929855819364	0.00270601997653394	0.0192504004789834	692304	14.535481	692304	DEK proto-oncogene	dek	NA
ENSDARG00000070122	126.347823350408	-0.395778221183001	0.146186266646467	-2.7073556925846	0.00678215491463087	0.0373127625656088	795019	14.545337	795019	serine/threonine kinase 11 interacting protein	stk11ip	NA
ENSDARG00000070140	212.198797084545	-1.91730734678859	0.666296732150163	-2.87755778210313	0.00400766506772484	0.0254603368093793	777751	14.551187	777751	zgc:154169	zgc:154169	NA
ENSDARG00000070145	62.2057375806761	-0.795502179974969	0.28943347226014	-2.74848024232657	0.00598722432120321	0.0339108100286942	100319849	14.833816	100319849	membrane associated guanylate kinase, WW and PDZ domain containing 1a	magi1a	NA
ENSDARG00000070214	271.643969389527	1.39834036046912	0.214502945169229	6.51897977142421	7.07871985436726e-11	1.22512415765228e-08	325975	14.82921	325975	solute carrier family 41 (magnesium transporter), member 1	slc41a1	NA
ENSDARG00000070231	59.3726737721274	-1.19927780632134	0.4070374905957	-2.94635711458961	0.00321540936320148	0.021823352624754	ENSDARG00000070231	14.829012	NA	polymerase (DNA directed), eta	polh	NA
ENSDARG00000070261	144.752971260383	-1.19341036768799	0.206013759611157	-5.79286728197432	6.91947870914205e-09	6.44842188932738e-07	550515	14.536741	550515	cytokine receptor-like factor 3	crlf3	NA
ENSDARG00000070284	68.2857475076694	0.468082212431158	0.162224327994673	2.88540084102878	0.00390915585638564	0.0249654313126579	407688	14.593083	407688	SFT2 domain containing 3	sft2d3	NA
ENSDARG00000070390	107.803487957138	0.572885406135874	0.159604327851504	3.58941022369322	0.000331426944246398	0.00413090270529333	445492	14.829012	445492	flavin adenine dinucleotide synthetase 1	flad1	NA
ENSDARG00000070454	355.968524582408	0.47218928399913	0.168617909125476	2.80035072459447	0.00510471109923753	0.0304049041136985	402802	14.852479	402802	phospholipase A2, group XIIA	pla2g12a	NA
ENSDARG00000070475	419.279074466403	0.264871110555025	0.0891880989447344	2.96980329986799	0.00297990487157873	0.0206648812359338	406516	14.543775	406516	KH domain containing, RNA binding, signal transduction associated 1b	khdrbs1b	NA
ENSDARG00000070477	39.6860912468506	0.810117388615177	0.287063975812825	2.82207959504957	0.00477133336211004	0.0289506995383589	403080	14.591863	403080	DnaJ (Hsp40) homolog, subfamily C, member 2	dnajc2	NA
ENSDARG00000070515	16.4324424414731	1.0905965550715	0.343035738709769	3.1792505328263	0.00147656408244457	0.0123856240760985	ENSDARG00000070515	14.830651	NA	si:dkeyp-52c3.5	si:dkeyp-52c3.5	NA
ENSDARG00000070545	362.564388025886	0.634416581333874	0.228902253880009	2.77156109466024	0.0055788202169506	0.0323694477626229	553496	14.544415	553496	DNA topoisomerase I, like	top1l	NA
ENSDARG00000070558	16.5253501016071	-1.16944464451038	0.373608901412424	-3.13013057261031	0.00174728618765217	0.0140373820712242	100005086	14.817384	100005086	si:ch211-93g23.2	si:ch211-93g23.2	NA
ENSDARG00000070560	298.676678657003	0.680043644617354	0.175119099985149	3.88332080666829	0.000103039475556111	0.00167756199501527	337155	14.550584	337155	nucleosome assembly protein 1-like 4a	nap1l4a	NA
ENSDARG00000070584	1646.16888882329	-0.287682659406587	0.0969641777267495	-2.96689629253901	0.00300822408696427	0.0208136121151183	405833	14.538123	405833	chloride intracellular channel 5b	clic5b	NA
ENSDARG00000070600	138.781576359507	0.645100671951135	0.23287345982965	2.77017686954553	0.0056025860152427	0.0323987253339691	100141364	14.536508	100141364	zgc:172180	zgc:172180	NA
ENSDARG00000070601	18.4562212578179	-0.761863300424242	0.291185439027464	-2.61641963612193	0.00888572785225158	0.0454030337115259	100150414	14.831221	100150414	si:dkey-85p17.3	si:dkey-85p17.3	NA
ENSDARG00000070607	191.772279512104	0.400465049608082	0.138603650607973	2.8892821210082	0.00386122482611362	0.0247506554329982	100093703	14.543538	100093703	mitochondrial ribosomal protein L36	mrpl36	NA
ENSDARG00000070625	28.5919992749178	-0.849685634525623	0.2654434491814	-3.20100434629661	0.00136949466362825	0.0117253907066122	563498	14.566941	563498	ectonucleotide pyrophosphatase/phosphodiesterase 5	enpp5	NA
ENSDARG00000070644	269.649651229501	1.70685574475815	0.348515854562169	4.89749812645517	9.70645594855673e-07	3.77946285155601e-05	321577	14.592722	321577	tocopherol (alpha) transfer protein-like	ttpal	NA
ENSDARG00000070651	81.5804155154716	-0.911524854690614	0.18291272860276	-4.98338667655117	6.24809129736274e-07	2.69379452197686e-05	100150844	14.827688	100150844	protein kinase C, delta b	prkcdb	NA
ENSDARG00000070657	698.794638513105	0.299051560752643	0.0827146520339793	3.61546054294942	0.000299814139750636	0.0038087169696254	323462	14.527806	323462	proliferation-associated 2G4, b	pa2g4b	NA
ENSDARG00000070674	269.124897442117	0.510366000521371	0.120178312637162	4.24673960985163	2.16903795678193e-05	0.000475124094242032	393261	14.538103	393261	proteasome 26S subunit, non-ATPase 6	psmd6	NA
ENSDARG00000070702	67.8613449815461	-0.520545921135441	0.161453291983692	-3.22412701989389	0.00126357339246023	0.0110494650734966	336965	14.55516	336965	S100 calcium binding protein V2	s100v2	NA
ENSDARG00000070735	17.6588816348986	-1.41160238378055	0.430757548489292	-3.27702297668649	0.00104907832008628	0.00969457196631986	751645	14.544415	751645	Rho family GTPase 2	rnd2	NA
ENSDARG00000070798	40.6649534104488	0.818094075335483	0.208156259569853	3.93019204431346	8.48780411987594e-05	0.00145034903966568	100003383	14.566941	100003383	phosphomevalonate kinase	pmvk	NA
ENSDARG00000070822	296.442701403096	-0.368547825914155	0.11488970076085	-3.20784041975451	0.00133735682595491	0.0115317280757607	325896	14.831473	325896	2',3'-cyclic nucleotide 3' phosphodiesterase	cnp	NA
ENSDARG00000070828	49.3978050872809	0.699372684578606	0.228834982598966	3.05623151074003	0.00224138118893705	0.016866045406194	192313	14.592722	192313	actin-like 6A	actl6a	NA
ENSDARG00000070846	28.5241829731268	0.68257833693277	0.241623534851309	2.82496627388891	0.00472855929042913	0.028772725165017	561459	14.550584	561459	DAZ associated protein 1	dazap1	NA
ENSDARG00000070849	4102.50603512205	-0.39959971138252	0.140631539503297	-2.84146581054212	0.00449066667856341	0.0277432059208545	337148	14.542969	337148	ribosomal protein S15	rps15	NA
ENSDARG00000070872	78.7512018388376	-3.15961646586731	0.652864678494996	-4.83961925027244	1.30088114883562e-06	4.79032678363027e-05	ENSDARG00000070872	14.823884	NA	NA	CR855393.1	NA
ENSDARG00000070892	5271.0136317162	0.269249946402036	0.0959853159262505	2.80511600971248	0.00502984728744705	0.0300921480925536	571127	14.595437	571127	si:ch211-262h13.5	si:ch211-262h13.5	NA
ENSDARG00000070903	98.9329290030632	-0.928369574298603	0.176740401324394	-5.25272980790989	1.49861301159055e-07	8.52380123728616e-06	100150664	14.566182	100150664	MET proto-oncogene, receptor tyrosine kinase	met	NA
ENSDARG00000070917	19.1264178038314	-0.835070176571526	0.281719623069837	-2.96418888919398	0.00303481939679434	0.0209140142162477	553179	14.527806	553179	kit ligand a	kitlga	NA
ENSDARG00000070958	44.1690239917707	-0.855676807316329	0.238427552145609	-3.58883358746124	0.000332160774459764	0.0041323970057576	792998	14.880765	792998	peroxisomal biogenesis factor 6	pex6	NA
ENSDARG00000070979	48.3276312488756	-0.942564887209209	0.324031887657768	-2.90886459978506	0.00362743926617259	0.0237163662761365	100150142	14.824423	100150142	alpha-(1,3)-fucosyltransferase 9-like	LOC100150142	NA
ENSDARG00000070981	141.46698661225	-0.417649216676849	0.107021535868257	-3.90247825625465	9.52127937765151e-05	0.00157797947551639	563799	14.535469	563799	ash1 (absent, small, or homeotic)-like (Drosophila)	ash1l	NA
ENSDARG00000071015	112.004559192321	-0.501120736617799	0.184821791408843	-2.71137257570063	0.00670052894708066	0.0369995023673118	563463	14.854625	563463	pre-B-cell leukemia homeobox interacting protein 1a	pbxip1a	NA
ENSDARG00000071062	293.361623578941	-0.495659905409798	0.181055976819935	-2.73760587259014	0.00618881959342335	0.0347286306708182	100037388	14.542969	100037388	Hermansky-Pudlak syndrome 5	hps5	NA
ENSDARG00000071116	675.726728625881	1.28396047039707	0.3374699182158	3.80466643422725	0.000141995411015831	0.00215034300557099	402965	14.544415	402965	endonuclease/exonuclease/phosphatase family domain containing 1	eepd1	NA
ENSDARG00000071150	220.45963547712	-0.366417059877556	0.133329968930762	-2.74819729439701	0.00599239388629039	0.0339242298749571	560266	14.880566	560266	capicua transcriptional repressor a	cica	NA
ENSDARG00000071215	71.084572494514	-0.832605754598298	0.220973666088225	-3.76789582821092	0.000164629371056531	0.00238574740472472	790940	14.592722	790940	paralemmin 3	palm3	NA
ENSDARG00000071259	321.471216588589	0.321956653196248	0.113400487936911	2.83911170977823	0.00452393162726186	0.0278965507699992	323474	14.543792	323474	F-box protein 34	fbxo34	NA
ENSDARG00000071306	55.6241801026617	-1.52127777121199	0.411983460614881	-3.69257000982879	0.000221999199306799	0.0030458893540225	790901	14.591863	790901	gastric inhibitory polypeptide	gip	NA
ENSDARG00000071345	179.780612551115	0.483492888606462	0.146171928678958	3.30770000078724	0.000940655173697776	0.00896619782010114	723997	14.817384	723997	microsomal glutathione S-transferase 2	mgst2	NA
ENSDARG00000071353	1743.55196247283	0.484476190895211	0.149531116295312	3.23996906395329	0.0011954266844578	0.0106128267009536	100002196	14.546301	100002196	si:ch211-235e9.8	si:ch211-235e9.8	NA
ENSDARG00000071395	183.347925365394	-0.325497845087212	0.111128226738156	-2.92902941620907	0.00340022241818366	0.0226712683523914	791855	14.547449	791855	calcium/calmodulin-dependent protein kinase (CaM kinase) II gamma 1	camk2g1	NA
ENSDARG00000071403	1703.78842972592	0.365504931413447	0.0953360173347319	3.83385987407185	0.000126148020743813	0.00195933752732217	259192	14.5362015	259192	ornithine decarboxylase antizyme 1a	oaz1a	NA
ENSDARG00000071406	46.1704539577803	-0.469267351264854	0.17246244656717	-2.72098280295523	0.00650881474757759	0.0361335958259921	100148088	14.82921	100148088	TEPSIN, adaptor related protein complex 4 accessory protein	tepsin	NA
ENSDARG00000071424	150.214053757878	-0.389435000328809	0.123296716065126	-3.15851883778564	0.00158573060638256	0.013024492404288	563359	14.591863	563359	adaptor-related protein complex 3, delta 1 subunit	ap3d1	NA
ENSDARG00000071468	77.8317722728764	0.622282231519222	0.237405506375371	2.6211785944649	0.00876263439769692	0.0449454930079766	100034614	14.535469	100034614	mitochondrial ribosomal protein L54	mrpl54	NA
ENSDARG00000071506	50.6027068613255	-0.507852649490827	0.192160804858164	-2.64285242698519	0.00822108581865357	0.0428564779229725	724006	14.545415	724006	mannosyl (alpha-1,6-)-glycoprotein beta-1,6-N-acetyl-glucosaminyltransferase	mgat5	NA
ENSDARG00000071551	186.382345198276	0.289143220920187	0.10948562734787	2.64092400001957	0.00826802641118117	0.0430271219808677	334488	14.592884	334488	X-ray repair complementing defective repair in Chinese hamster cells 6	xrcc6	NA
ENSDARG00000071553	25.3731056433565	1.27529843492349	0.496094531092257	2.57067626227537	0.0101500160491478	0.0499258808101605	100006475	14.595437	100006475	zgc:171500	zgc:171500	NA
ENSDARG00000071567	14.2333995820398	-0.980440394049999	0.301778010108389	-3.24887951145896	0.00115860542332251	0.0103865626380727	563265	14.82342	563265	si:dkey-34l15.1	si:dkey-34l15.1	NA
ENSDARG00000071592	22.4280076749907	-3.06812162610947	0.991903032870266	-3.09316689679964	0.00198032730271299	0.0154386520414208	563130	14.55516	563130	aquaporin 8a, tandem duplicate 2	aqp8a.2	NA
ENSDARG00000071644	230.318059334593	1.13796321931901	0.346355833247402	3.2855321322282	0.00101789931659695	0.00951392457062713	101883120	14.82921	101883120	si:dkey-19a16.7	si:dkey-19a16.7	NA
ENSDARG00000071652	47.702719688287	0.994608592756921	0.30903267195417	3.21845773285882	0.001288819640773	0.0112008966628156	797198	14.825805	797198	ribosomal RNA processing 8, methyltransferase, homolog (yeast)	rrp8	NA
ENSDARG00000071657	23.6413741503036	-1.00812201830096	0.267848472421818	-3.76377736705301	0.000167365899677182	0.00241673167412284	557050	14.552143	557050	si:dkey-19a16.4	si:dkey-19a16.4	NA
ENSDARG00000071669	24.4888856580924	0.943988712221291	0.292920980534096	3.22267360467002	0.00127000179507242	0.0110691163649657	447875	14.544415	447875	SMYD family member 5	smyd5	NA
ENSDARG00000071863	212.507826571797	-1.02082295117097	0.124415494276664	-8.20495033280147	2.30686233361301e-16	1.47092827219587e-13	556734	14.544127	556734	integrin, beta 1a	itgb1a	NA
ENSDARG00000071871	684.063769083274	0.580006704304079	0.088123398864425	6.58175594425722	4.6492431259948e-11	8.80087194866047e-09	553706	14.552143	553706	glyoxalase domain containing 5	glod5	NA
ENSDARG00000071878	63.1935545787041	0.563689861231104	0.163789055922033	3.44155998737444	0.000578370214752532	0.00626740174573071	553790	14.551187	553790	tRNA methyltransferase 11-2 homolog (S. cerevisiae)	trmt112	NA
ENSDARG00000073665	90.7219222095609	-0.646085272325126	0.150578982770537	-4.29067364141833	1.78131938072944e-05	0.000411655141542689	564822	14.831221	564822	RAS p21 protein activator (GTPase activating protein) 1b	rasa1b	NA
ENSDARG00000073688	20.0535303764974	-1.15704265529962	0.257596395996965	-4.49168805651012	7.06608685936898e-06	0.000189812954104779	100333160	14.799049	100333160	neuron navigator 2a	nav2a	NA
ENSDARG00000073718	26.0243445595889	-0.869941575096356	0.298055168972721	-2.91872668437424	0.00351464231349571	0.0232296190005458	798813	14.831455	798813	si:ch73-233k15.2	si:ch73-233k15.2	NA
ENSDARG00000073764	220.54360439633	-0.739256776884073	0.200871211491387	-3.68025249310437	0.000233003123216524	0.00315400317069071	558239	14.853864	558239	si:ch211-113j14.1	si:ch211-113j14.1	NA
ENSDARG00000073845	500.662793389212	0.505276887393336	0.13928214470509	3.62772190551193	0.000285932995551874	0.00368399166435358	541492	14.591863	541492	zgc:110843	zgc:110843	NA
ENSDARG00000073876	14.0141346966258	-1.81707633641279	0.393828406292601	-4.61387829668834	3.95223905035712e-06	0.000119404927917897	100333040	14.880765	100333040	si:ch1073-165f9.2	si:ch1073-165f9.2	NA
ENSDARG00000073905	89.9186860248905	-0.45201622923154	0.159192032876486	-2.83944002136244	0.00451927901858525	0.0278915258839329	ENSDARG00000073905	14.809612	NA	NA	NA	NA
ENSDARG00000073909	180.445208735684	-0.756371174739485	0.250872631946598	-3.01496089418191	0.00257012390893374	0.018633782858607	559938	14.880566	559938	diphosphoinositol pentakisphosphate kinase 1b	ppip5k1b	NA
ENSDARG00000073957	25.2107709003891	2.11761725673718	0.41234922293586	5.13549471891831	2.81402782574079e-07	1.41586309670454e-05	555286	14.799049	555286	TOX high mobility group box family member 3	tox3	NA
ENSDARG00000073988	74.0356375695317	-0.463292167269999	0.141599721189773	-3.2718437817338	0.00106848597253465	0.00981876306385192	556663	14.551187	556663	MAX network transcriptional repressor b	mntb	NA
ENSDARG00000074031	94.5667497236942	0.465100740689769	0.140683045671056	3.30601842227146	0.000946318656955531	0.00900640956352742	564382	14.839874	564382	FAST kinase domains 2	fastkd2	NA
ENSDARG00000074041	131.126020954228	-0.589998877536203	0.131527177661087	-4.48575638912047	7.26557185685305e-06	0.000194309940498399	100151075	14.593083	100151075	ATP-binding cassette, sub-family A (ABC1), member 5	abca5	NA
ENSDARG00000074059	40.9529844573094	-0.825520938505481	0.180854639833473	-4.56455493354002	5.00555121877639e-06	0.000144386316703514	569065	14.804419	569065	discs, large homolog 5a (Drosophila)	dlg5a	NA
ENSDARG00000074120	49.5727549623843	-1.20881734345587	0.339367310815661	-3.56197342799607	0.000368077645140838	0.00446372439527652	564054	14.839874	564054	ubiquitin specific peptidase 2b	usp2b	NA
ENSDARG00000074121	58.3309672564522	-0.445992228197895	0.149791427373536	-2.97742157891133	0.00290683998394061	0.0203445213203007	100005174	14.815266	100005174	dynamin binding protein	dnmbp	NA
ENSDARG00000074137	13.4650029439649	-0.973401089637673	0.359715954615432	-2.70602701144664	0.00680935070454613	0.037395867536526	797081	14.834426	797081	C2 calcium-dependent domain containing 3	c2cd3	NA
ENSDARG00000074143	38.7984278434608	0.689856193185402	0.2281151080672	3.02415828145052	0.00249325957758117	0.0182604991062081	555290	14.854555	555290	myosin X-like 3	myo10l3	NA
ENSDARG00000074191	844.409402103096	0.851583603676963	0.143601879903643	5.9301703031212	3.02620642259639e-09	3.18804267910916e-07	100007732	14.535469	100007732	zgc:172253	zgc:172253	NA
ENSDARG00000074225	31.4936231850121	-0.720515496591655	0.266737279855783	-2.70121783119787	0.00690860741722358	0.0378209574603089	100537961	14.825805	100537961	si:ch211-269e2.1	si:ch211-269e2.1	NA
ENSDARG00000074238	34.1549000238463	-0.88120671740316	0.201791901676552	-4.36690823606802	1.26017639174192e-05	0.000304820294048502	100003354	14.854625	100003354	bromodomain and PHD finger containing, 3b	brpf3b	NA
ENSDARG00000074262	76.4243168980502	-0.614698398144718	0.236591977585088	-2.5981371152944	0.00937310578498909	0.0471574653592786	564584	14.842841	564584	NCK adaptor protein 1a	nck1a	NA
ENSDARG00000074282	567.761880167674	-0.358522152765612	0.12998447525902	-2.75819209987334	0.00581220308438401	0.0332459114104402	100332784	14.831455	100332784	si:ch73-12o23.1	si:ch73-12o23.1	NA
ENSDARG00000074308	35.580998174895	1.22058600614133	0.256690030220483	4.75509705263157	1.98351106267051e-06	6.80743244313124e-05	101885211	14.833097	101885211	leucine rich repeat containing 75Ba	lrrc75ba	NA
ENSDARG00000074316	54.6554773533728	-0.630428986969385	0.209941102939098	-3.00288499080748	0.00267433475718902	0.0191486794227807	570868	14.819327	570868	integrin, alpha 1	itga1	NA
ENSDARG00000074345	75.906971983786	-0.748762654915584	0.230834047118792	-3.24372710291847	0.00117976719178357	0.0105186877488176	564346	14.831455	564346	si:ch211-214b16.3	si:ch211-214b16.3	NA
ENSDARG00000074362	2460.27290480696	-0.585357110918384	0.187069068178586	-3.12909620290389	0.00175344889756604	0.0140775569211482	100124609	14.55516	100124609	zgc:165582	zgc:165582	NA
ENSDARG00000074367	138.208883233228	-0.379319399149125	0.118684107207606	-3.19604206556153	0.00139326797327978	0.0118785654442537	559878	14.880765	559878	ubiquitin specific peptidase 12b	usp12b	NA
ENSDARG00000074378	26.2864578521094	-1.30647237107966	0.47245196596558	-2.76530200992928	0.00568701164499104	0.0327462671478452	407086	14.533042	407086	JunB proto-oncogene, AP-1 transcription factor subunit a	junba	NA
ENSDARG00000074381	104.974784277108	-1.06292569390253	0.136354162699875	-7.79532999107704	6.42403749136275e-15	3.24280059199415e-12	ENSDARG00000074381	14.82342	NA	FERM, RhoGEF (ARHGEF) and pleckstrin domain protein 1 (chondrocyte-derived)	farp1	NA
ENSDARG00000074533	32.9750079246525	0.671073676268939	0.234870559529886	2.85720644431619	0.00427387763326206	0.0266759544188407	571961	14.527806	571961	solute carrier family 25, member 38b	slc25a38b	NA
ENSDARG00000074556	85.0315939675963	-0.549099961064153	0.171846869183144	-3.19528638301205	0.00139692150878104	0.0118929754595097	100536353	14.831473	100536353	glucosidase, alpha; neutral C	ganc	NA
ENSDARG00000074561	46.5091844278432	-1.02687838971583	0.277149653666083	-3.70514043994815	0.000211273639371164	0.00292858139700418	101886448	14.824423	101886448	solute carrier family 47 (multidrug and toxin extrusion), member 3	slc47a3	NA
ENSDARG00000074590	17.645009809994	-0.948807135748882	0.308544249114949	-3.07510880034391	0.00210425776027621	0.0161382119635843	100333125	14.8804035	100333125	WD repeat containing planar cell polarity effector	wdpcp	NA
ENSDARG00000074653	55.9615333965205	-0.862692767335217	0.268141336705097	-3.21730613390657	0.00129400445361299	0.0112298452403448	558788	14.833983	558788	si:ch211-233m11.1	si:ch211-233m11.1	NA
ENSDARG00000074656	27.4546131562464	-0.979245698815833	0.323417524005954	-3.02780655385206	0.00246335721794975	0.0181089640142362	554157	14.55516	554157	cathepsin S, ortholog2, tandem duplicate 1	ctss2.1	NA
ENSDARG00000074660	82.5239355439415	-0.74481352585847	0.194477367474075	-3.82982110223061	0.000128236451832383	0.00198694676534836	100005026	14.839874	100005026	Rab interacting lysosomal protein	rilp	NA
ENSDARG00000074663	156.892832782316	0.385212217974389	0.1367072974357	2.81778826149038	0.00483556867589374	0.0292475858754132	100037314	14.527806	100037314	zgc:162183	zgc:162183	NA
ENSDARG00000074740	58.4203001037051	-1.07434077711727	0.23624322720092	-4.54760455927725	5.42599648500589e-06	0.000153230646656985	ENSDARG00000074740	14.833017	NA	Rho GTPase activating protein 18	ARHGAP18	NA
ENSDARG00000074750	63.7671605499755	-0.805854619851897	0.25363525432978	-3.17721849031331	0.00148694967628459	0.0124494784576281	100330496	14.853864	100330496	glutamine and serine rich 1	qser1	NA
ENSDARG00000074752	198.682975699511	-0.498809141288678	0.164255685385591	-3.03678463316335	0.00239116233716771	0.0177397009888468	768192	14.546743	768192	hepatic leukemia factor a	hlfa	NA
ENSDARG00000074756	261.128623749681	0.551840281856992	0.173594248905383	3.17890877915989	0.00147830606726753	0.012385669436339	569468	14.535481	569468	transcription factor B2, mitochondrial	tfb2m	NA
ENSDARG00000074848	68.5323389328286	-0.471902021224252	0.151908705805662	-3.10648437639882	0.00189326312840915	0.0148844145364548	100093704	14.551187	100093704	small integral membrane protein 7	smim7	NA
ENSDARG00000074894	414.257997220291	0.436958538800151	0.131433353776681	3.32456356202086	0.000885570444382852	0.00856855385390238	100537539	14.880566	100537539	myogenesis regulating glycosidase (putative)	myorg	NA
ENSDARG00000074985	67.8266918865939	0.761970502530826	0.213410501446628	3.57044520942371	0.000356374995000247	0.00434791849388519	100126015	14.551187	100126015	aurora kinase A interacting protein 1	aurkaip1	NA
ENSDARG00000074995	175.627461470902	0.305724763780407	0.118305362746475	2.58420038350725	0.00976050679400486	0.0484030044246291	ENSDARG00000074995	14.837396	NA	eukaryotic translation initiation factor 2B, subunit 5 epsilon	eif2b5	NA
ENSDARG00000075025	82.2878520498976	0.430205496735374	0.161931273699505	2.65671656195148	0.00789057529387426	0.0415989206637453	393694	14.546743	393694	cell division cycle 123 homolog (S. cerevisiae)	cdc123	NA
ENSDARG00000075048	409.433784568102	-1.45133492837222	0.178065803331462	-8.1505539032142	3.62261122740203e-16	2.19439675099878e-13	560773	14.838869	560773	LON peptidase N-terminal domain and ring finger 1	lonrf1	NA
ENSDARG00000075053	120.844843665505	-0.983068936358558	0.160329649195099	-6.13154797814281	8.70280806040135e-10	1.03367176129179e-07	569379	14.546743	569379	zgc:174379	zgc:174379	NA
ENSDARG00000075072	71.202316017652	0.583783005782171	0.173081193571071	3.3728852553958	0.000743849442508414	0.00757085922841962	570666	14.831809	570666	RNA polymerase II associated protein 1	rpap1	NA
ENSDARG00000075083	40.2231021082886	-0.640907861963908	0.207108224765953	-3.09455533544445	0.0019710816251611	0.0153764674107062	562283	14.852479	562283	protein kinase, DNA-activated, catalytic polypeptide	prkdc	NA
ENSDARG00000075110	49.0285894307996	-0.629861252376288	0.186888102515083	-3.37025869437276	0.000750976464757434	0.00763261734105395	558237	14.552193	558237	DAB2 interacting protein b	dab2ipb	NA
ENSDARG00000075149	52.994542711562	-0.516524681779386	0.194554738123169	-2.65490672065968	0.00793303417789249	0.0417682351434887	569719	14.550584	569719	N-acetylglucosamine-1-phosphodiester alpha-N-acetylglucosaminidase	nagpa	NA
ENSDARG00000075159	55.6831723804186	-2.35826804232329	0.63431081577252	-3.71784302534899	0.000200931053516933	0.00280446971584982	565942	14.837396	565942	melanotransferrin	meltf	NA
ENSDARG00000075192	742.197185591892	0.561643192113941	0.179966890721568	3.12081400007559	0.00180351908453296	0.0143464436698075	793098	14.8804035	793098	YME1-like 1a	yme1l1a	NA
ENSDARG00000075253	166.260715696589	-0.293230574682148	0.105147641686285	-2.78875084575858	0.00529117538268133	0.0311480027994093	100002263	14.879544	100002263	phosphatidylinositol-4,5-bisphosphate 3-kinase, catalytic subunit beta	pik3cb	NA
ENSDARG00000075295	24.5967648918447	1.7777569352687	0.356727362487666	4.983517168045	6.24387709410326e-07	2.69379452197686e-05	103908677	14.825805	103908677	tubby-related protein 1-like	LOC103908677	NA
ENSDARG00000075339	10.5039002488105	-1.53150278302708	0.464444544430826	-3.29749332055118	0.0009755199487599	0.00921155430960732	ENSDARG00000075339	14.833097	NA	intracisternal A particle-promoted polypeptide	ipp	NA
ENSDARG00000075380	190.325618764894	1.32315156724806	0.286894033909257	4.6119870435039	3.98837860594362e-06	0.000120197031868177	402800	14.527806	402800	KRI1 homolog	kri1	NA
ENSDARG00000075397	32.1950251750753	-0.737639281624684	0.226274979103199	-3.25992420615035	0.00111441990306033	0.0100830449033427	100535864	14.552143	100535864	CLOCK-interacting pacemaker a	cipca	NA
ENSDARG00000075405	138.536666048208	0.883380033975914	0.170210717707727	5.18992015234191	2.10384277678728e-07	1.14296211842054e-05	100001584	14.802482	100001584	aarF domain containing kinase 5	adck5	NA
ENSDARG00000075445	229.022480916638	0.448727538906455	0.153922761412352	2.91527734292873	0.00355372582207277	0.0233985806165281	30387	14.540007	30387	proteasome subunit beta 5	psmb5	NA
ENSDARG00000075450	20.1728625559525	1.17892915070275	0.412224424037702	2.85992066931708	0.00423746995166577	0.0265033290988285	799136	14.543538	799136	mohawk homeobox a	mkxa	NA
ENSDARG00000075504	89.8101914164482	-0.688651385228774	0.140753869699901	-4.89259291198911	9.95161098605776e-07	3.83961041707292e-05	334026	14.802482	334026	si:dkey-40c23.2	si:dkey-40c23.2	NA
ENSDARG00000075517	64.7246106568228	1.16573028393636	0.318089397318533	3.66478824432177	0.00024754330901076	0.00328116760247851	563199	14.55516	563199	si:ch211-120k19.1	si:ch211-120k19.1	NA
ENSDARG00000075560	103.977905565816	-0.59372400515262	0.125957233081116	-4.71369520137253	2.4326446251456e-06	7.95108400986528e-05	568162	14.825785	568162	lysine (K)-specific methyltransferase 2Cb	kmt2cb	NA
ENSDARG00000075570	318.731092020781	0.31228716955279	0.109923797616936	2.84094232843967	0.00449804459510506	0.0277746229713037	561390	14.535736	561390	insulin-degrading enzyme	ide	NA
ENSDARG00000075593	75.942444597247	-0.576865049399537	0.16464920505014	-3.50360057446902	0.000459013285167259	0.00526151238129905	561754	14.852479	561754	tripartite motif containing 71, E3 ubiquitin protein ligase	trim71	NA
ENSDARG00000075616	32.5698203619879	0.56974008825495	0.22022073372833	2.5871319135545	0.00967785341278144	0.0481507983966518	796803	14.593284	796803	polymerase (RNA) II (DNA directed) polypeptide K	polr2k	NA
ENSDARG00000075720	14.0528025062417	-1.18412141959297	0.340525238145629	-3.47733820271662	0.000506418592362156	0.00569133696332794	793920	14.550584	793920	interleukin 2 receptor, beta	il2rb	NA
ENSDARG00000075752	96.0453435761322	-1.37205609829193	0.202293999929102	-6.78248538648101	1.1812581440307e-11	2.81452435671405e-09	566880	14.879544	566880	myosin XVIIIAa	myo18aa	NA
ENSDARG00000075758	736.253678047805	0.273599501707452	0.103740668309004	2.63734084392539	0.00835588259032635	0.0432983394276321	406419	14.551187	406419	tyrosine 3-monooxygenase/tryptophan 5-monooxygenase activation protein, beta polypeptide b	ywhabb	NA
ENSDARG00000075798	59.0942685451121	0.64051750964443	0.187796776157399	3.41069491580403	0.000647975509102668	0.0068441353903913	563778	14.833816	563778	ubiquitin specific peptidase 38	usp38	NA
ENSDARG00000075800	13.5363265426	-1.26222960131457	0.480757952473536	-2.62549916193857	0.00865220219088888	0.0445669343293447	560151	14.829012	560151	calmodulin-like 4a	calml4a	NA
ENSDARG00000075821	28.1395195730237	-0.838897067394756	0.221824931242452	-3.78179793721136	0.00015569972569963	0.00230697626187973	561012	14.827688	561012	plexin b1a	plxnb1a	NA
ENSDARG00000075831	37.1094418986295	-1.43902412834036	0.335148118727315	-4.29369597479731	1.75723063606233e-05	0.000409400945305675	100007704	14.55516	100007704	solute carrier family 7 (amino acid transporter light chain, L system), member 8a	slc7a8a	NA
ENSDARG00000075853	70.1495044643182	-0.909842215674914	0.216561735354384	-4.20130645049569	2.65379074435997e-05	0.000561606957171113	793623	14.809612	793623	SH3-domain kinase binding protein 1	sh3kbp1	NA
ENSDARG00000075864	13.7165683957185	-1.82600953763081	0.404537213632245	-4.51382339151322	6.36692427158739e-06	0.000174120287923885	557459	14.852479	557459	immunoglobulin superfamily, member 9a	igsf9a	NA
ENSDARG00000075887	42.0373422910328	-0.571550499879986	0.19523537249295	-2.92749460603316	0.00341704987987612	0.0227334208098293	100003587	14.852479	100003587	HECT and RLD domain containing E3 ubiquitin protein ligase 3	herc3	NA
ENSDARG00000075963	3322.94591869311	-0.792506017518286	0.200075818978257	-3.96102848192969	7.46276295179369e-05	0.00131795004607843	30757	14.536508	30757	major histocompatibility complex class I UBA	mhc1uba	NA
ENSDARG00000076004	29.6096271955376	0.773574385465903	0.276709815853033	2.79561598883347	0.00518009100910987	0.0307330081172214	566032	14.804419	566032	protein phosphatase 2, regulatory subunit B'', beta	ppp2r3b	NA
ENSDARG00000076011	173.10652926006	-0.732415940126455	0.229473022104553	-3.19173004917654	0.00141423440384673	0.0120150419373094	562087	14.832098	562087	si:ch211-149b19.3	si:ch211-149b19.3	NA
ENSDARG00000076066	1051.26506073952	0.782330560558823	0.250426060137656	3.12399819782648	0.00178411549506641	0.0142482262509753	100002072	14.538103	100002072	membrane-associated ring finger (C3HC4) 6	march6	NA
ENSDARG00000076104	592.250522402781	-0.54783859481795	0.133470270146581	-4.10457395655451	4.05060676562278e-05	0.000801848054992156	561146	14.835336	561146	sema domain, immunoglobulin domain (Ig), transmembrane domain (TM) and short cytoplasmic domain, (semaphorin) 4Bb	sema4bb	NA
ENSDARG00000076118	122.111010789363	-0.82557366718669	0.312260974003443	-2.64385797751847	0.00819670404182983	0.0427911423116545	557073	14.592722	557073	cell death-inducing p53 target 1	cdip1	NA
ENSDARG00000076120	182.059653739015	0.937089275491353	0.182215460334846	5.14275393410263	2.70740129191368e-07	1.37922401960379e-05	557245	14.536741	557245	forkhead box P4	foxp4	NA
ENSDARG00000076144	122.159218234168	-0.508398293144826	0.165457215681552	-3.07268734730383	0.00212140623266506	0.0162150388067743	100334824	9.2828	100334824	si:ch211-74m13.3	si:ch211-74m13.3	NA
ENSDARG00000076155	50.5745137971298	0.550235459526669	0.205689124692846	2.67508289681495	0.00747107742895399	0.0400318898946385	563801	14.880566	563801	mitochondrial poly(A) polymerase	mtpap	NA
ENSDARG00000076176	65.8735221090455	0.850596698786461	0.207679086931457	4.09572630231755	4.20846896666089e-05	0.000827688336543778	570247	14.804419	570247	pentatricopeptide repeat domain 1	ptcd1	NA
ENSDARG00000076179	214.805907460173	-0.438541277755681	0.151853276532075	-2.88792766129779	0.00387789044780419	0.0248314365771164	569090	14.833489	569090	neuronal guanine nucleotide exchange factor	ngef	NA
ENSDARG00000076270	1381.48816541967	-0.340086918202071	0.127522393041729	-2.66687998938967	0.0076559004723274	0.0407339632069594	100320289	14.82342	100320289	ADAM metallopeptidase with thrombospondin type 1 motif, 13	adamts13	NA
ENSDARG00000076317	67.3982122462842	-0.679885839928046	0.201963682775388	-3.36637671974013	0.000761626170741415	0.00770852218757915	556077	14.542969	556077	procollagen-lysine, 2-oxoglutarate 5-dioxygenase 3	plod3	NA
ENSDARG00000076371	43.8954943791399	-1.56502994569115	0.546344678708794	-2.86454688163133	0.00417606332804064	0.0262411863170188	556551	14.819327	556551	shroom family member 2b	shroom2b	NA
ENSDARG00000076426	247.088826029342	-0.442593915782234	0.0987205677206717	-4.48329994449127	7.34975061430646e-06	0.000196128257031548	100884140	14.804419	100884140	desmoglein 2 like	dsg2l	NA
ENSDARG00000076435	64.1451884571038	-0.801242044901069	0.171851668167895	-4.66240481365751	3.12535653453992e-06	9.80924725801842e-05	568517	14.552143	568517	abhydrolase domain containing 10a	abhd10a	NA
ENSDARG00000076439	349.786609592453	0.640895769688372	0.150711677920001	4.25246257312963	2.11432561006861e-05	0.000466576589544285	562705	14.549713	562705	protein phosphatase 4, catalytic subunit b	ppp4cb	NA
ENSDARG00000076484	23.4285801336279	-0.677388039657615	0.253996628122795	-2.66691744951091	0.00765504721048213	0.0407339632069594	570626	14.552143	570626	stabilin 1	stab1	NA
ENSDARG00000076486	114.35852505937	0.521398074712154	0.14659857306191	3.55663812970378	0.000375631014586026	0.00451913579117151	541489	14.546301	541489	acid phosphatase 1	acp1	NA
ENSDARG00000076496	132.925830672064	-1.94735914639339	0.388209725357213	-5.01625543925135	5.26882685608392e-07	2.3381625407127e-05	ENSDARG00000076496	14.823884	NA	FERM domain containing 4Bb	frmd4bb	NA
ENSDARG00000076526	128.268774240077	1.23935394584215	0.204497707648784	6.0604784282995	1.35717252938548e-09	1.55114577297218e-07	393950	14.595437	393950	GAR1 homolog, ribonucleoprotein	gar1	NA
ENSDARG00000076552	24.70547068641	0.786709876898064	0.234889211419659	3.34928059123375	0.00081021698216811	0.00802598425099481	564476	14.549713	564476	zgc:193801	zgc:193801	NA
ENSDARG00000076554	29.5893661640769	-1.34311950296468	0.400711626074583	-3.35183562334349	0.00080277667834996	0.00798492566355481	100151416	14.809612	100151416	cyclin-dependent kinase inhibitor 1A	cdkn1a	NA
ENSDARG00000076564	36.250407086261	-1.10444073836829	0.229954060327629	-4.80287556912336	1.56403086218967e-06	5.58944952667489e-05	565429	14.8207245	565429	heparan sulfate proteoglycan 2	hspg2	NA
ENSDARG00000076568	736.591474715518	0.278584796325208	0.106978192607989	2.60412696769008	0.00921086275968768	0.0465927358386707	791986	14.809612	791986	Sec61 translocon beta subunit	sec61b	NA
ENSDARG00000076585	43.0878510498445	0.571650355954398	0.1768235349995	3.2328861424245	0.0012254639376227	0.0108053097556762	569198	14.835131	569198	si:ch211-113e8.11	si:ch211-113e8.11	NA
ENSDARG00000076595	37.4999358679387	-0.886734927981377	0.26579466107553	-3.3361653104439	0.000849426381667359	0.0083057309232446	563785	14.815266	563785	sema domain, immunoglobulin domain (Ig), transmembrane domain (TM) and short cytoplasmic domain, (semaphorin) 4Ga	sema4ga	NA
ENSDARG00000076667	6014.20150501533	-0.629131136481643	0.151812407783482	-4.14413515777262	3.41098533384006e-05	0.000692195767495349	171473	14.546743	171473	cyclin G1	ccng1	NA
ENSDARG00000076673	120.74081759113	-0.868314294542455	0.174859742804304	-4.9657758876738	6.84269396118889e-07	2.90874516981766e-05	327364	14.838869	327364	wu:fi04e12	wu:fi04e12	NA
ENSDARG00000076747	37.2486278548369	2.00232917816971	0.38949244718134	5.14086779515256	2.73472433570858e-07	1.38624206389579e-05	100330322	14.839825	100330322	transmembrane and coiled-coil domain family 1a	tmcc1a	NA
ENSDARG00000076773	83.7321570345067	-1.64456009240827	0.262209293237437	-6.27193671171327	3.56584530725146e-10	4.85395684239903e-08	100000656	14.5362015	100000656	leucine rich repeat containing 58a	lrrc58a	NA
ENSDARG00000076853	20.0661738931501	-1.03706609206206	0.312718857459709	-3.31628895195639	0.000912214579636272	0.00875711539801381	101884611	14.833017	101884611	amphiregulin	areg	NA
ENSDARG00000076899	31.5156489854118	0.640022149080023	0.203863137548069	3.13946972845501	0.00169253900657357	0.0137157926853772	559440	14.545337	559440	solute carrier family 2 (facilitated glucose transporter), member 13b	slc2a13b	NA
ENSDARG00000076950	22.4654461337116	1.00860025256954	0.33066809798289	3.05018917374283	0.00228697266389668	0.0171346158460781	101882278	14.804419	101882278	Kell blood group, metallo-endopeptidase	kel	NA
ENSDARG00000076972	30.4030274508472	-1.16238550484468	0.307147066975705	-3.78445907457297	0.000154043252408054	0.00228705147417104	100136858	14.538123	100136858	plasmalemma vesicle associated protein a	plvapa	NA
ENSDARG00000076994	29.6545507589654	-1.04605536069482	0.268788097158109	-3.89174733462807	9.95248607796077e-05	0.00163601585935542	560700	14.566872	560700	adhesion G protein-coupled receptor A2	adgra2	NA
ENSDARG00000077004	19806.6981329371	-0.589618463765853	0.187884988425679	-3.13818825392262	0.00169995658174471	0.0137574976538658	100526683	14.547449	100526683	aldehyde dehydrogenase 1 family, member L1	aldh1l1	NA
ENSDARG00000077009	110.00467702344	-1.04085151954313	0.21524588736686	-4.83563952034597	1.32718246320358e-06	4.87236834597315e-05	572477	14.799049	572477	WDFY family member 4	wdfy4	NA
ENSDARG00000077012	80.3235906092265	0.638470182233065	0.231819653479181	2.75416761543216	0.00588416244240216	0.0334679004646489	79380	14.546743	79380	eukaryotic translation initiation factor 4ea	eif4ea	NA
ENSDARG00000077037	144.347363124908	0.403696178779578	0.12611409613206	3.2010393061601	0.00136932851309453	0.0117253907066122	324180	14.552143	324180	taxilin alpha	txlna	NA
ENSDARG00000077058	42.2632057675187	-1.62449610728419	0.466751268274337	-3.48043212242409	0.000500605654098983	0.00564696228995267	100334908	14.852479	100334908	elastase-1-like	LOC100334908	NA
ENSDARG00000077215	188.80356986326	-0.718132036656497	0.143441327232767	-5.0064514217103	5.54426457081196e-07	2.45141479107251e-05	566131	14.535736	566131	eukaryotic translation initiation factor 4 gamma, 3a	eif4g3a	NA
ENSDARG00000077217	54.6164696385047	-0.907295673620317	0.322453637711685	-2.81372441650529	0.00489711907763972	0.0294873745654102	559822	14.535481	559822	zgc:162184	zgc:162184	NA
ENSDARG00000077249	11.7251679121381	-1.10098260385367	0.342931240735637	-3.21050541062371	0.00132501774042336	0.0114416179082174	565801	14.837396	565801	GEM interacting protein	gmip	NA
ENSDARG00000077264	717.590667441269	0.667291050239628	0.190044810822006	3.51123004807854	0.000446038224457802	0.00515625294781133	317637	14.833816	317637	WD repeat domain 43	wdr43	NA
ENSDARG00000077265	31.2640156192219	0.834035819363161	0.296135513001783	2.81639919140039	0.00485652814385144	0.0293304279475375	100148281	14.591863	100148281	WD repeat domain 89	wdr89	NA
ENSDARG00000077353	170.243322933705	-0.381906299177875	0.142898941009952	-2.67256213712093	0.00752744322098824	0.0402271612802261	569081	14.592884	569081	arginine-glutamic acid dipeptide (RE) repeats a	rerea	NA
ENSDARG00000077400	108.625685937725	-1.04897859710722	0.165710888896983	-6.33017301451647	2.44886451572237e-10	3.4903521891737e-08	101882554	14.82419	101882554	RNA binding motif protein 10	rbm10	NA
ENSDARG00000077410	122.090523411113	-0.449098962418358	0.151396428705592	-2.96637751800397	0.00301330357683744	0.0208253324859578	560956	14.837396	560956	myosin IXb	myo9b	NA
ENSDARG00000077434	68.1680498198396	0.709326451360351	0.188148087698791	3.77004337400401	0.000163219178534646	0.00236982042421984	325065	14.819327	325065	MON1 secretory trafficking family member Bb	mon1bb	NA
ENSDARG00000077469	123.730787214559	0.776746454631691	0.24768666442836	3.13600434009782	0.00171266669117065	0.0138326379756883	325603	14.551187	325603	polymerase (RNA) I polypeptide B	polr1b	NA
ENSDARG00000077470	14.5257792646778	1.4769899822698	0.536528956258963	2.75286163969295	0.0059076857900824	0.0335544366370597	100321107	14.880566	100321107	si:dkey-193b15.8	si:dkey-193b15.8	NA
ENSDARG00000077471	17.8628829062627	-1.14546447605332	0.396732082725176	-2.88724942078053	0.00388626022250843	0.0248454050636885	560402	14.535481	560402	5-hydroxymethylcytosine (hmC) binding, ES cell-specific	hmces	NA
ENSDARG00000077473	36.5356855110418	-1.16984191852357	0.422226624381106	-2.77064934083281	0.00559446389446032	0.0323848557026766	560341	14.546301	560341	myelocytomatosis oncogene homolog	mych	NA
ENSDARG00000077481	63.0886736642186	0.907624275645724	0.30970220782997	2.93063547078108	0.00338269465199377	0.0226282917328562	566817	14.566182	566817	si:dkey-76k16.6	si:dkey-76k16.6	NA
ENSDARG00000077492	53.6395757374846	1.16302867000357	0.337427189209072	3.44675446199136	0.000567363977542298	0.00619071907327805	100330943	14.546135	100330943	ATPase phospholipid transporting 8A2	atp8a2	NA
ENSDARG00000077506	151.415969385018	-0.453982779887744	0.140281173780583	-3.23623453990931	0.00121117822507797	0.0107340337943084	378845	14.832098	378845	tight junction protein 1a	tjp1a	NA
ENSDARG00000077580	156.27730407666	-0.973292962832503	0.218131814854431	-4.46194867760131	8.12176803793707e-06	0.000213438654619539	570420	14.825805	570420	thrombospondin-type laminin G domain and EAR repeats a	tspeara	NA
ENSDARG00000077614	81.3973277467699	0.432165826286725	0.154868787769949	2.79052888906632	0.00526220039340445	0.0310626927707883	565648	14.852479	565648	si:ch211-206k20.5	si:ch211-206k20.5	NA
ENSDARG00000077639	79.0999652445096	0.488295568983524	0.158828065488192	3.07436577712284	0.00210950620317452	0.0161648751748636	100007575	14.542969	100007575	inturned planar cell polarity protein	intu	NA
ENSDARG00000077709	83.7265161997914	-0.718428271817372	0.217628770262796	-3.30116404623266	0.000962845678537054	0.00912030914423488	797187	14.838266	797187	IQ motif and Sec7 domain 2b	iqsec2b	NA
ENSDARG00000077721	60.9735542813524	0.692803262113324	0.188858205339483	3.66837787570825	0.000244094239599769	0.0032532472087472	558776	14.837396	558776	lysine-rich nucleolar protein 1	knop1	NA
ENSDARG00000077728	86.8850145427476	0.508200217459455	0.186625245222415	2.72310542367296	0.00646714170057272	0.0359401016983663	570852	14.799049	570852	SUV3-like helicase	supv3l1	NA
ENSDARG00000077760	70.0778099183878	1.47054911292414	0.273351430171105	5.37970155123627	7.46094226325408e-08	4.56511694542036e-06	ENSDARG00000077760	14.879544	NA	activating signal cointegrator 1 complex subunit 1	ascc1	NA
ENSDARG00000077776	640.595517673156	0.269118072028545	0.0821611820668222	3.27548929139882	0.0010547911315409	0.00972511001416899	30428	14.536508	30428	casein kinase 2, beta polypeptide	csnk2b	NA
ENSDARG00000077804	114.035710674372	-0.696255468749252	0.133005048120282	-5.23480483326919	1.65159284698788e-07	9.22075914343697e-06	100329505	14.829012	100329505	heparan-alpha-glucosaminide N-acetyltransferase	hgsnat	NA
ENSDARG00000077828	73.6281142300297	0.874986512227609	0.19234052298445	4.5491532343309	5.38622120397905e-06	0.000152819835799078	101887173	14.829012	101887173	solute carrier family 29 (equilibrative nucleoside transporter), member 3	slc29a3	NA
ENSDARG00000077863	10.8108366580236	-1.34130929900997	0.438679161194348	-3.05760888061816	0.00223110571545964	0.016820065801365	796066	14.543792	796066	methyltransferase like 22	mettl22	NA
ENSDARG00000077872	1186.00787310435	-1.01104807990398	0.152062220290749	-6.64891041292712	2.95270641067285e-11	5.98079609290908e-09	ENSDARG00000077872	14.815489	NA	NA	CR626907.1	NA
ENSDARG00000077901	1052.59804367107	0.538541534925558	0.190220199139422	2.83114799249492	0.00463812551508323	0.0283649119713445	336598	14.883119	336598	HECT and RLD domain containing E3 ubiquitin protein ligase family member 1	herc1	NA
ENSDARG00000077910	20.0408547483562	-1.10502923708631	0.317849915722174	-3.47657552331143	0.000507861170907529	0.00569740408555877	100332358	14.833983	100332358	counting factor associated protein D-like	LOC100332358	NA
ENSDARG00000077926	41.0332780330024	0.72567692906877	0.211321180345104	3.43399997995318	0.000594744239997928	0.00641614111093045	566307	14.545415	566307	si:dkey-48p11.3	si:dkey-48p11.3	NA
ENSDARG00000077950	215.381082298564	0.362573126771357	0.0968985433921044	3.74178098120824	0.000182720729360477	0.00258605331332031	565062	14.592722	565062	torsin family 1	tor1	NA
ENSDARG00000077982	109.150245334571	-0.603465943877965	0.230995340788572	-2.6124593760976	0.0089893375009746	0.0458024580939795	ENSDARG00000077982	14.831221	NA	E74-like factor 3 (ets domain transcription factor, epithelial-specific )	elf3	NA
ENSDARG00000078066	17.2512633403255	-0.84502276430325	0.290945915648623	-2.90439809893667	0.00367959961010217	0.0239154234315385	567895	14.817384	567895	ELK1, member of ETS oncogene family	elk1	NA
ENSDARG00000078073	169.632895880113	0.71281285982439	0.132381062016027	5.38455311484125	7.26248564053285e-08	4.46624434188099e-06	415176	14.544127	415176	nudix (nucleoside diphosphate linked moiety X)-type motif 5	nudt5	NA
ENSDARG00000078077	87.4220929382009	0.774328209301806	0.22995907380481	3.36724355551657	0.000759236027584375	0.00769075624931831	562538	14.799049	562538	DPH2 homolog (S. cerevisiae)	dph2	NA
ENSDARG00000078095	231.017694301482	-0.473046803505574	0.165345556260145	-2.86095867470009	0.00422362102599338	0.0264393802259297	101883257	14.839825	101883257	CLOCK-interacting pacemaker b	cipcb	NA
ENSDARG00000078105	113.855016999802	-0.389185509850735	0.144645139107131	-2.69062280456232	0.00713187807970712	0.0386243642984586	562995	14.830651	562995	DEP domain containing 5	depdc5	NA
ENSDARG00000078139	11.6084455464317	-1.89136614860827	0.379259328050155	-4.98699968259752	6.13241660462989e-07	2.66804880869556e-05	100000135	14.545415	100000135	adaptor protein, phosphotyrosine interaction, PH domain and leucine zipper containing 2	appl2	NA
ENSDARG00000078167	46.4530956039149	-1.09198384282458	0.284044215385379	-3.84441500187927	0.000120840359156904	0.00189634838236514	103910657	14.804419	103910657	si:dkeyp-100h4.2	si:dkeyp-100h4.2	NA
ENSDARG00000078172	56.3091350429202	-0.550145325821662	0.212723134141863	-2.58620355534426	0.00970396036188878	0.0482212796490084	101883373	14.824423	101883373	prostaglandin F2 receptor inhibitor	ptgfrn	NA
ENSDARG00000078179	164.219749685165	-1.5503974894773	0.308982126376207	-5.01775784787494	5.22780117206244e-07	2.32848570586531e-05	572313	14.591863	572313	fibronectin type III domain containing 3Ba	fndc3ba	NA
ENSDARG00000078180	1389.11544609919	0.727037493076367	0.146770254421065	4.95357520462281	7.28621792559536e-07	3.04388035064096e-05	569842	14.535481	569842	sc:d0202	sc:d0202	NA
ENSDARG00000078186	164.007634991271	-0.853603494071658	0.145183042533159	-5.87949859141918	4.11511101669925e-09	4.15454749727595e-07	798401	14.546301	798401	testis expressed 2	tex2	NA
ENSDARG00000078214	410.972326513787	0.694426952144632	0.204750679928205	3.39157336321486	0.000694925560654301	0.00718814222750633	321277	14.538103	321277	MYB binding protein (P160) 1a	mybbp1a	NA
ENSDARG00000078270	117.003778215186	-0.682983544958611	0.20733932594105	-3.29403764509583	0.000987592709223171	0.00927495013351838	ENSDARG00000078270	14.804419	NA	NA	CU467961.1	NA
ENSDARG00000078283	12.0288741640803	-0.899929892097792	0.337282465560613	-2.66817870476005	0.00762636820283326	0.0406482405531566	100333177	14.827688	100333177	si:zfos-323e3.4	si:zfos-323e3.4	NA
ENSDARG00000078313	50.5607647324173	-0.872504373238776	0.191441817926717	-4.55754329272389	5.17554247577718e-06	0.000148230962397259	100332329	14.842841	100332329	myosin IXb-like	LOC100332329	NA
ENSDARG00000078347	60.6320522537229	-0.924204631981439	0.173529112020955	-5.32593419754164	1.0043548849713e-07	5.87814465286342e-06	ENSDARG00000078347	14.854625	NA	dendrocyte expressed seven transmembrane protein	DCSTAMP	NA
ENSDARG00000078348	109.032166612238	-0.335227435834087	0.115318214727023	-2.90697732901627	0.00364939645539319	0.0238085288406508	100006417	14.593083	100006417	transcription factor 20	tcf20	NA
ENSDARG00000078383	66.9007343332249	0.496694499750998	0.14607362412355	3.40030243468795	0.000673113582798435	0.00701787526299745	751762	14.546301	751762	MAPK regulated corepressor interacting protein 1	mcrip1	NA
ENSDARG00000078430	22.8992544342732	-0.985184752782981	0.283175617724235	-3.47905925199529	0.000503177319040613	0.00566542120834296	567621	14.883119	567621	T-cell lymphoma invasion and metastasis 1a	tiam1a	NA
ENSDARG00000078442	58.7834816353283	0.510734952185139	0.189104688055253	2.700805344582	0.00691718095667245	0.0378507892005812	100332577	14.839874	100332577	NOP9 nucleolar protein	nop9	NA
ENSDARG00000078473	219.429039886334	-0.524734469478785	0.176837056631521	-2.96733320195543	0.00300395222565414	0.0207959321221714	447862	14.533042	447862	nuclear casein kinase and cyclin-dependent kinase substrate 1a	nucks1a	NA
ENSDARG00000078479	33.3228758306478	-1.13982498546043	0.260587415645928	-4.3740599776666	1.21956847947329e-05	0.000297884518726188	793471	14.547653	793471	molybdenum cofactor synthesis 1	mocs1	NA
ENSDARG00000078571	80.9213650972578	0.42936053768211	0.14084254357903	3.04851450968851	0.00229975806714961	0.0171984993725417	100004270	14.552143	100004270	WD repeat domain 6	wdr6	NA
ENSDARG00000078593	50.3561850688754	-0.529766211402993	0.163010069091904	-3.24989869861544	0.00115446124321495	0.0103648021354479	561317	14.547449	561317	von Willebrand factor A domain containing 8	vwa8	NA
ENSDARG00000078600	242.327650906521	-0.442252591783606	0.146324982700875	-3.0223997544403	0.00250779129251405	0.0183177860415353	570705	14.544127	570705	low density lipoprotein receptor class A domain containing 3	ldlrad3	NA
ENSDARG00000078619	4926.30362587798	-1.02267004990494	0.287652293765068	-3.55522994973986	0.000377648656592209	0.00453890225656211	791647	14.535736	791647	purine nucleoside phosphorylase 5a	pnp5a	NA
ENSDARG00000078683	495.463073539017	-1.16479095452446	0.269734031432392	-4.31829438925067	1.57239609584399e-05	0.000372062084006835	ENSDARG00000078683	14.815489	NA	ring finger protein 14	RNF14 (1 of many)	NA
ENSDARG00000078725	112.271110373075	-0.697697773748973	0.127823959981584	-5.45827068610216	4.80794293556416e-08	3.20045212441538e-06	ENSDARG00000078725	14.831221	NA	nitric oxide synthase 1 (neuronal) adaptor protein a	nos1apa	NA
ENSDARG00000078741	17.6504458558162	-1.0173272302766	0.325213699266262	-3.12818073953176	0.00175891983493486	0.0141121283445271	566376	14.552143	566376	zgc:172136	zgc:172136	NA
ENSDARG00000078745	144.174083082443	0.389337725286521	0.122756806445983	3.17161823086236	0.00151592147072192	0.0126309412777139	100126812	14.880566	100126812	patatin-like phospholipase domain containing 8	pnpla8	NA
ENSDARG00000078751	135.770048396375	0.401143336381956	0.129882340315784	3.08851330678716	0.00201160684692035	0.0156132490119079	100331669	14.8804035	100331669	tripeptidyl peptidase 2	tpp2	NA
ENSDARG00000078757	124.477011403278	-1.92524717975905	0.713563701556867	-2.6980733122474	0.00697420798375695	0.0380390924354485	108179231	14.833983	108179231	alpha-2-macroglobulin-like	LOC108179231	NA
ENSDARG00000078770	202.435524693131	-0.431372584083192	0.167606182023613	-2.5737271673095	0.0100609575406303	0.0496688322647237	336430	14.547653	336430	si:ch73-21k16.5	si:ch73-21k16.5	NA
ENSDARG00000078773	36.4100462140597	0.786107501543121	0.297139134102031	2.64558723952257	0.00815492559562492	0.0426717741000844	100002535	14.815266	100002535	transmembrane protein 70	tmem70	NA
ENSDARG00000078778	70.1968193051217	-0.563889013675475	0.173516433306399	-3.24977296346189	0.00115497176086295	0.0103648021354479	560885	14.839874	560885	leucine-rich repeats and calponin homology (CH) domain containing 1	lrch1	NA
ENSDARG00000078781	73.181510309167	0.964392771222336	0.264492482267299	3.64620106762698	0.000266145757414357	0.00346704930223111	100334833	14.535481	100334833	si:ch211-161c3.6	si:ch211-161c3.6	NA
ENSDARG00000078815	101.467628323752	-0.589316246599179	0.188533885382963	-3.12578423450044	0.00177331608454527	0.0141967763408531	567452	14.879544	567452	G protein-coupled receptor kinase 5 like	grk5l	NA
ENSDARG00000078856	227.207417943576	-0.740938335699383	0.170687311995679	-4.34091044633792	1.41893549531327e-05	0.000339731294974709	555979	14.544127	555979	solute carrier family 22, member 23	slc22a23	NA
ENSDARG00000078887	49.1767721639744	-0.76197220756367	0.228451474656121	-3.3353788094852	0.000851832741666195	0.0083091414374283	571658	14.566182	571658	ATPase phospholipid transporting 10D	atp10d	NA
ENSDARG00000078888	50.641274063798	-0.85584813038052	0.281621555505786	-3.03900079254741	0.00237364229953694	0.017642132796865	100002928	14.543792	100002928	IQ motif containing GTPase activating protein 1	iqgap1	NA
ENSDARG00000078942	43.5092943941695	0.57427467503999	0.223234805355036	2.57251405813109	0.0100962855480274	0.0497877005530676	566327	14.809612	566327	ecto-NOX disulfide-thiol exchanger 2	enox2	NA
ENSDARG00000078954	66.8463172606735	-1.19512197928152	0.179759565578666	-6.64844719352922	2.9620120971898e-11	5.98079609290908e-09	30530	14.541529	30530	retinoid x receptor, beta a	rxrba	NA
ENSDARG00000079000	62.4994606390592	-0.87180979082466	0.169051821501728	-5.15705647582005	2.50862157293459e-07	1.31566884658453e-05	557086	14.550584	557086	tumor protein p53 binding protein, 1	tp53bp1	NA
ENSDARG00000079104	112.481651847523	-0.587244121608845	0.188018988462371	-3.12332348137472	0.00178821092959719	0.0142591282887509	797005	14.831809	797005	malignant fibrous histiocytoma amplified sequence 1	mfhas1	NA
ENSDARG00000079105	184.136920146224	-1.25755417672934	0.344035875590172	-3.65529953692208	0.000256881870132665	0.00337540548444386	654336	14.34304	654336	zgc:123077	zgc:123077	NA
ENSDARG00000079105	184.136920146224	-1.25755417672934	0.344035875590172	-3.65529953692208	0.000256881870132665	0.00337540548444386	368877	15.236921	368877	si:busm1-266f07.1	si:busm1-266f07.1	NA
ENSDARG00000079105	184.136920146224	-1.25755417672934	0.344035875590172	-3.65529953692208	0.000256881870132665	0.00337540548444386	30762	14.34304	30762	major histocompatibility complex class II DAB gene	mhc2dab	NA
ENSDARG00000079105	184.136920146224	-1.25755417672934	0.344035875590172	-3.65529953692208	0.000256881870132665	0.00337540548444386	768296	15.2150755	768296	zgc:152682	zgc:152682	NA
ENSDARG00000079166	51.2042177209638	-3.71879418410092	0.935232801465941	-3.97632993439906	6.99870082672859e-05	0.00125057906365512	565980	14.802482	565980	angiotensin I converting enzyme (peptidyl-dipeptidase A) 1	ace	NA
ENSDARG00000079221	29.9489244719712	1.87854873395646	0.302310664371526	6.21396779985178	5.16631193923424e-10	6.65849671742795e-08	ENSDARG00000079221	14.592884	NA	si:ch211-162k9.6	si:ch211-162k9.6	NA
ENSDARG00000079257	42.430650951619	0.987160354162619	0.244158346366987	4.04311533417272	5.27456584926016e-05	0.000987656341016798	799538	14.833489	799538	gem (nuclear organelle) associated protein 5	gemin5	NA
ENSDARG00000079271	315.701598346687	0.392812285609863	0.13935900945626	2.81870750332187	0.00482174341300708	0.0291931141672068	550282	14.538103	550282	dicarbonyl/L-xylulose reductase	dcxr	NA
ENSDARG00000079281	43.411952453396	-0.852942698190605	0.250040598579237	-3.41121683053526	0.000646736387172312	0.00683700814187833	559449	14.852479	559449	si:dkeyp-75h12.2	si:dkeyp-75h12.2	NA
ENSDARG00000079290	14.5588821797583	1.36995607117215	0.327642310376057	4.18125506928504	2.89904426684813e-05	0.000604508111753273	ENSDARG00000079290	14.880765	NA	si:ch211-162k9.5	si:ch211-162k9.5	NA
ENSDARG00000079306	152.762482589244	0.410716385380528	0.145179361163729	2.82902736372654	0.00466897067170686	0.0285028978450392	562487	14.833097	562487	ring finger protein, LIM domain interacting	rlim	NA
ENSDARG00000079307	61.8037753211763	-0.525202146110879	0.197461832259706	-2.65976538402683	0.00781951000246387	0.0413682810829039	559970	14.538103	559970	si:dkey-205h13.1	si:dkey-205h13.1	NA
ENSDARG00000079363	32.7987758111814	-1.40834947159729	0.256600687227088	-5.4884867488719	4.05391675755602e-08	2.72851119543284e-06	ENSDARG00000079363	14.799049	NA	leucine-rich repeats and immunoglobulin-like domains 3	lrig3	NA
ENSDARG00000079366	37.887380651286	-0.528175763208242	0.1971587943601	-2.67893585433251	0.00738565410464425	0.0397146912906192	558232	14.837396	558232	protein phosphatase 1, regulatory subunit 9Ba	ppp1r9ba	NA
ENSDARG00000079388	552.39686634999	-0.599244863344573	0.129741060109956	-4.61877575870515	3.86010735682239e-06	0.000116913001569758	565373	14.552143	565373	agrin	agrn	NA
ENSDARG00000079402	40.6600166158903	-0.842597076808502	0.212812163576888	-3.95934641444532	7.51551577087185e-05	0.00132148727959525	30163	14.804419	30163	TAP binding protein (tapasin), tandem duplicate 1	tapbp.1	NA
ENSDARG00000079416	145.485450182153	0.638724690417713	0.228007215817839	2.80133542320874	0.00508915918737271	0.0303570475406304	100126024	14.546135	100126024	zgc:174895	zgc:174895	NA
ENSDARG00000079420	57.1389320955605	-1.27235518674665	0.423878343938865	-3.00169896608392	0.0026847752624783	0.0191705035637207	100301982	14.566182	100301982	dipeptidyl-peptidase 4	dpp4	NA
ENSDARG00000079434	321.829611636117	-0.376361178044439	0.13436193915911	-2.80109962984946	0.00509287930271182	0.0303571906359505	565444	14.880964	565444	transmembrane 131 like	tmem131l	NA
ENSDARG00000079438	328.150391766937	-0.43743293148004	0.151965971385756	-2.8784926486578	0.00399580593648973	0.0254249941809733	100330353	14.538123	100330353	plakophilin 3b	pkp3b	NA
ENSDARG00000079470	37.8346205624839	-1.38727162034596	0.234763230276285	-5.90923722898737	3.43695447457208e-09	3.55886354354194e-07	798487	14.817384	798487	cyclin-dependent kinase 17	cdk17	NA
ENSDARG00000079473	33.4297494992134	-1.00570888888715	0.211932677358674	-4.74541680604115	2.08077422619283e-06	7.04150272355478e-05	561518	14.799049	561518	si:ch211-120p12.3	si:ch211-120p12.3	NA
ENSDARG00000079486	233.522810330963	-1.09076860490011	0.253139877463608	-4.30895604370718	1.6402696131706e-05	0.000385933045185385	564308	14.527583	564308	family with sequence similarity 20, member A	fam20a	NA
ENSDARG00000079504	298.056678429223	-0.793924239013407	0.196184324013037	-4.04682811946101	5.19163333907536e-05	0.000977953458765899	567448	14.540007	567448	mitofusin 2	mfn2	NA
ENSDARG00000079543	2427.06647043046	-0.383257835070272	0.126071439428704	-3.04000522883705	0.00236574041345943	0.0175941958926096	100144569	14.550584	100144569	dihydropyrimidinase	dpys	NA
ENSDARG00000079552	36.2746116358523	-1.07351797871015	0.287559667538419	-3.7332007923772	0.000189061755231654	0.00266025919237106	101886283	14.809612	101886283	mastermind-like transcriptional coactivator 3	maml3	NA
ENSDARG00000079560	20.6495253423191	-2.80011249964357	0.715268992358252	-3.91476847110562	9.04909994216569e-05	0.00152861508327245	ENSDARG00000079560	14.835336	NA	protein tyrosine phosphatase, receptor type, h	ptprh	NA
ENSDARG00000079571	84.1059668454647	0.368335712718544	0.129402705623459	2.84642976314839	0.00442124813596271	0.0273841621509142	100037368	14.547449	100037368	major facilitator superfamily domain containing 4B	mfsd4b	NA
ENSDARG00000079572	12.8926425254411	-0.86136057126477	0.304094756068056	-2.83254003588276	0.00461797828198809	0.0282845333095479	562569	14.593284	562569	phospholipase C, delta 3b	plcd3b	NA
ENSDARG00000079605	84.1074417642175	0.909407841277983	0.224826707575952	4.04492798512722	5.23392104497216e-05	0.000983084549764926	368664	14.550584	368664	protein arginine methyltransferase 5	prmt5	NA
ENSDARG00000079624	15.8929386896178	-1.05119214819509	0.359537269305484	-2.92373625194871	0.00345857658321305	0.0229466896525882	100885784	14.549713	100885784	APC membrane recruitment protein 1	amer1	NA
ENSDARG00000079632	56.8301452080947	-0.453982464811113	0.170259020205921	-2.66642239725119	0.00766633033046216	0.0407445184885774	571834	14.809612	571834	si:dkey-28b4.7	si:dkey-28b4.7	NA
ENSDARG00000079645	53.4782352290322	-2.5678697685792	0.388099771935014	-6.6165196536348	3.67754001754977e-11	7.07196782739929e-09	ENSDARG00000079645	14.880765	NA	sc:d217	sc:d217	NA
ENSDARG00000079647	96.9631774960296	-1.99162162800815	0.607501256422728	-3.2783827308207	0.00104403733973182	0.00966272908391982	799648	14.566941	799648	mucin 13b, cell surface associated	muc13b	NA
ENSDARG00000079651	164.846024409034	0.547572935810562	0.184264775681852	2.97166364968198	0.00296190974622075	0.0205894415409761	570430	14.880765	570430	si:ch1073-174d20.2	si:ch1073-174d20.2	NA
ENSDARG00000079664	172.723217015761	0.452311806268558	0.139502657331999	3.24231677674864	0.00118562157160019	0.0105616215734826	565385	14.535469	565385	zgc:172341	zgc:172341	NA
ENSDARG00000079716	121.560577627706	-0.610566552653662	0.157279021258581	-3.88205971634218	0.000103575433121867	0.00167756199501527	563090	14.533042	563090	SIN3 transcription regulator family member Aa	sin3aa	NA
ENSDARG00000079717	44.5949973026134	0.496784860988178	0.187957241512316	2.64307380227021	0.00821571252517873	0.0428469036773742	334496	14.566872	334496	RNA binding motif protein 12B	rbm12b	NA
ENSDARG00000079745	100.868610385806	-0.5511020786024	0.174164587793111	-3.16426022985252	0.00155477710605517	0.0128398940966996	100000230	14.82419	100000230	si:ch211-166a6.5	si:ch211-166a6.5	NA
ENSDARG00000079756	20.8715856871447	-0.978910367729949	0.303351598078985	-3.2269827287182	0.00125103011219358	0.0109668811933612	565111	14.854555	565111	pseudopodium-enriched atypical kinase 1	peak1	NA
ENSDARG00000079780	342.246464639747	-0.266697703197094	0.0903289391655158	-2.95251672012228	0.00315194999872841	0.0215130947603849	ENSDARG00000079780	14.839874	NA	heterogeneous nuclear ribonucleoprotein U-like 1 like	hnrnpul1l	NA
ENSDARG00000079816	20.0046182824662	0.699549448370762	0.261730993062974	2.67278032373662	0.0075225493987675	0.0402187493230663	797317	14.527806	797317	rhomboid domain containing 3	rhbdd3	NA
ENSDARG00000079839	38.4918107259943	-0.673877816174728	0.207673839770354	-3.24488542668592	0.00117497888518257	0.0104899551908525	570029	14.809612	570029	arrestin domain containing 1b	arrdc1b	NA
ENSDARG00000079850	26.3447318523462	-0.982638720145331	0.256061625585539	-3.8375087164987	0.000124288824066044	0.00193791390419578	553300	14.827688	553300	dachsous cadherin-related 1b	dchs1b	NA
ENSDARG00000079889	25.1602651274867	-1.31218837054034	0.257049521112997	-5.1048076839774	3.31131095856065e-07	1.63075334402286e-05	570807	14.842841	570807	pleckstrin homology-like domain, family B, member 2a	phldb2a	NA
ENSDARG00000079895	20.7499121581154	-0.848947378657874	0.313052652681294	-2.71183576113042	0.00669117369793927	0.0369646919063084	100331563	14.833983	100331563	EH domain binding protein 1-like 1b	ehbp1l1b	NA
ENSDARG00000079949	206.826667140378	0.265141069458594	0.102321347970587	2.59125856644119	0.00956256134627689	0.0477143454325142	562348	14.566182	562348	SPT16 homolog, facilitates chromatin remodeling subunit	supt16h	NA
ENSDARG00000079980	17.8203020050608	-3.42196905513469	1.30979737447214	-2.61259422398352	0.00898579189925357	0.0458024580939795	559480	14.536508	559480	si:ch211-202h22.9	si:ch211-202h22.9	NA
ENSDARG00000080009	23.2301525449849	-1.18561208801139	0.32550050166637	-3.64242783633745	0.000270078704500472	0.00351073337448844	794333	14.835336	794333	BAH domain and coiled-coil containing 1b	bahcc1b	NA
ENSDARG00000080019	191.335754038306	0.299569647465881	0.102879852843867	2.91183977411509	0.00359306891215365	0.0235640457432287	567370	14.833017	567370	si:dkey-82j4.2	si:dkey-82j4.2	NA
ENSDARG00000080020	60.8001760677397	-0.708020640638018	0.187515834165362	-3.77579122205566	0.000159500548950542	0.00233940575125402	799475	14.593083	799475	interleukin 13 receptor, alpha 1	il13ra1	NA
ENSDARG00000080337	1949.02283779172	-0.396429439027559	0.15217069913912	-2.60516276306996	0.00918306247219536	0.0465103686666583	ENSDARG00000080337	14.82419	NA	NA	AC024175.4	NA
ENSDARG00000080675	15.1999757337367	-1.55176021211005	0.422687835636664	-3.67117310052879	0.000241439744522508	0.00322450976639795	100007015	14.853864	100007015	si:dkey-71b5.7	si:dkey-71b5.7	NA
ENSDARG00000082753	2158.07975230358	-0.802275850961011	0.209259133765753	-3.83388689670811	0.00012613415604087	0.00195933752732217	ENSDARG00000082753	14.839825	NA	NA	AC024175.17	NA
ENSDARG00000086034	19.013812092104	-1.26275670266391	0.303099245823423	-4.16614927309833	3.09787896896677e-05	0.000640171358813696	ENSDARG00000086034	14.879544	NA	poliovirus receptor-related 1b	pvrl1b	NA
ENSDARG00000086057	65.2612862177077	-0.947897052365808	0.159400330259196	-5.94664421851861	2.73695399514981e-09	2.93435377444602e-07	ENSDARG00000086057	14.823164	NA	NA	CABZ01112317.1	NA
ENSDARG00000086173	111.874720371543	-0.42669455251642	0.146651334146432	-2.90958520766243	0.00361908719820861	0.0236751682791762	795414	14.543792	795414	v-rel avian reticuloendotheliosis viral oncogene homolog B	relb	NA
ENSDARG00000086269	203.60509600702	-0.608096448105285	0.193869577748662	-3.13662646386758	0.00170903713381886	0.013821657495146	793524	14.823164	793524	N-deacetylase/N-sulfotransferase (heparan glucosaminyl) 2a	ndst2a	NA
ENSDARG00000086277	22.8071750258559	-1.76696138753799	0.524990376781299	-3.36570243129251	0.000763490228336191	0.0077194601366361	ENSDARG00000086277	14.802482	NA	NA	FP017169.1	NA
ENSDARG00000086283	168.049758933626	-0.600255949323884	0.187004253106109	-3.20985185819966	0.00132803397170113	0.0114594954182045	569425	14.823151	569425	consortin, connexin sorting protein a	cnsta	NA
ENSDARG00000086374	101.918207611345	-0.962187086189496	0.241157286876093	-3.98987357443554	6.61085225064853e-05	0.00119359873348147	558956	14.566941	558956	ISG15 ubiquitin-like modifier	isg15	NA
ENSDARG00000086421	63.3499988930003	-0.816049439296433	0.271078203278852	-3.01038382808293	0.00260917738161233	0.0188604916337908	100001422	14.880765	100001422	si:ch211-212k18.8	si:ch211-212k18.8	NA
ENSDARG00000086455	148.498389535082	0.412792170021251	0.133802307612567	3.0850900659839	0.00203490521854183	0.0157325314120193	ENSDARG00000086455	14.809612	NA	caseinolytic mitochondrial matrix peptidase chaperone subunit a	clpxa	NA
ENSDARG00000086471	27.2066044438182	-0.572231272716966	0.21194302971783	-2.69992966260228	0.00693541370816341	0.0378879601814238	503808	14.535736	503808	protein kinase (cAMP-dependent, catalytic) inhibitor gamma	pkig	NA
ENSDARG00000086654	538.684221191007	-1.07476414537688	0.328911643207907	-3.26763788260763	0.00108449025928536	0.00991592414433365	100149559	14.545806	100149559	cerebellin 11	cbln11	NA
ENSDARG00000086678	118.780673188104	-0.594424212784239	0.160828350057718	-3.69601635887525	0.000219008866933383	0.00300826805317226	ENSDARG00000086678	14.833489	NA	activating signal cointegrator 1 complex subunit 3	ascc3	NA
ENSDARG00000086739	138.748205499144	0.504989720499795	0.150742152890804	3.35002327362012	0.000808047706481736	0.00801104579707547	571066	14.830651	571066	si:ch1073-513e17.1	si:ch1073-513e17.1	NA
ENSDARG00000086752	16.1207510460974	-1.80434067023903	0.447650673298433	-4.03068905703654	5.56135756161521e-05	0.00103495924514544	ENSDARG00000086752	14.883119	NA	NA	CABZ01069013.1	NA
ENSDARG00000086815	40.7275706092444	-0.827750824969607	0.225886997874512	-3.66444652750422	0.000247874017096298	0.00328196034658104	100005501	14.833489	100005501	si:dkeyp-67a8.2	si:dkeyp-67a8.2	NA
ENSDARG00000086826	72.9763228698401	-2.46922857159117	0.675949341110763	-3.65297873881136	0.000259215701822322	0.00339502511089452	322462	14.545337	322462	sulfotransferase family, cytosolic, 6b, member 1	sult6b1	NA
ENSDARG00000086927	40.9741002391417	-0.685256861804789	0.226731550944517	-3.02232688370961	0.00250839513354577	0.0183177860415353	567938	14.879544	567938	phosphatidylinositol-4-phosphate 3-kinase, catalytic subunit type 2 beta	pik3c2b	NA
ENSDARG00000086996	212.852257416665	0.473300423298567	0.121308316138807	3.90163212517924	9.55462865772383e-05	0.00158134325393886	449923	14.566872	449923	si:ch73-234b20.5	si:ch73-234b20.5	NA
ENSDARG00000086998	235.363250558978	-1.49947422108725	0.333241794467373	-4.49965834412786	6.80627652749628e-06	0.000184469888435386	393330	14.592884	393330	zgc:64002	zgc:64002	NA
ENSDARG00000087188	437.838208821615	-1.17821236639348	0.223744673909904	-5.26587894051015	1.39520205721332e-07	8.01084024793335e-06	431765	14.3697405	431765	nuclear factor, interleukin 3 regulated, member 6	nfil3-6	NA
ENSDARG00000087303	1118.3969100972	-0.523557758060934	0.191339656644525	-2.73627415896126	0.00621392317772145	0.0348526293046738	140817	14.372293	140817	CCAAT/enhancer binding protein (C/EBP), delta	cebpd	NA
ENSDARG00000087346	190.985845306395	0.445276142890645	0.128482100457001	3.46566674507058	0.000528918434266894	0.00587875856068203	406714	14.538123	406714	RAP1A, member of RAS oncogene family b	rap1ab	NA
ENSDARG00000087443	213.796092708511	0.402043299328587	0.104806027870831	3.8360703816014	0.00012501859411963	0.00194678697655439	449541	14.549713	449541	protein tyrosine phosphatase type IVA, member 2a	ptp4a2a	NA
ENSDARG00000087446	20.4408144200494	-0.820076072287279	0.277334360611429	-2.95699411525959	0.00310654046717127	0.0212751485357716	ENSDARG00000087446	14.823164	NA	monocyte to macrophage differentiation-associated 2a	mmd2a	NA
ENSDARG00000087471	42.9018825653242	0.486920438089619	0.176957408700997	2.75162504731499	0.00593003748489541	0.0336498379997695	ENSDARG00000087471	14.827688	NA	NA	CABZ01072827.1	NA
ENSDARG00000087483	37.108637290941	0.58230848259749	0.188547672611967	3.08838859971443	0.00201245128115265	0.0156132490119079	558387	14.831221	558387	si:dkey-226l10.6	si:dkey-226l10.6	NA
ENSDARG00000087574	11.5458246819247	-1.48951754839472	0.438786106761702	-3.39463243124891	0.000687207950925462	0.0071402438468799	555604	14.536741	555604	NADPH oxidase 1	nox1	NA
ENSDARG00000087625	18.0288307187042	-5.29283889489444	1.63788495054287	-3.23150835053473	0.00123138725874091	0.0108364454472284	569427	14.839825	569427	si:ch211-173a9.7	si:ch211-173a9.7	NA
ENSDARG00000087633	16.6830667326249	-2.12835704274836	0.713487626721039	-2.98303286986154	0.0028540734099873	0.0200912837664126	ENSDARG00000087633	14.815489	NA	si:dkey-11o18.5	si:dkey-11o18.5	NA
ENSDARG00000087636	154.390763833674	-0.60852466763651	0.139864799994233	-4.35080640491102	1.35637770238895e-05	0.000326041981437344	100151347	14.527806	100151347	high-mobility group nucleosome binding domain 1-like	fb06f03	NA
ENSDARG00000087640	185.648866996548	0.318029566093802	0.116999317617791	2.71821727313598	0.00656347222418328	0.036375327537045	492805	14.566872	492805	NSFL1 (p97) cofactor (p47)	nsfl1c	NA
ENSDARG00000087674	16.9813534639583	0.889184741237306	0.29465307755526	3.01773444423144	0.00254671965033373	0.0185417719734334	101883863	14.82921	101883863	si:ch1073-127d16.1	si:ch1073-127d16.1	NA
ENSDARG00000087704	246.52699504581	1.28433309811328	0.331300421149695	3.87664191206377	0.000105908049059548	0.00169911198179507	556647	14.535469	556647	GDNF family receptor alpha 3	gfra3	NA
ENSDARG00000087709	164.885389517562	-0.959177018333931	0.269019729267777	-3.56545232182278	0.000363229193152259	0.00441819445285102	568600	14.809612	568600	protocadherin Fat 3-like	LOC568600	NA
ENSDARG00000087779	183.540265441214	1.3833739006935	0.210488339228407	6.57221158076771	4.95733502700864e-11	9.23970982341687e-09	553068	14.545415	553068	pumilio RNA-binding family member 3	pum3	NA
ENSDARG00000087893	155.462326592921	0.780807005968761	0.136216735868971	5.73209305734525	9.9198819369822e-09	8.60861248668018e-07	559441	14.823164	559441	ring finger protein 216	rnf216	NA
ENSDARG00000087921	180.659915935332	-0.730331399225427	0.184816081378462	-3.95166586034183	7.76090543261434e-05	0.00135524878340671	568288	14.546743	568288	phospholipase C, epsilon 1	plce1	NA
ENSDARG00000087950	238.964548066679	0.316214319367927	0.107691384880573	2.93630098376578	0.00332151873363593	0.0223444307955725	100329390	14.833983	100329390	IWS1, SUPT6H interacting protein	iws1	NA
ENSDARG00000088083	183.458754745619	-0.492567701866857	0.167974654064865	-2.93239301255919	0.00336360792551145	0.0225263184176734	ENSDARG00000088083	14.831473	NA	SIK family kinase 3	sik3	NA
ENSDARG00000088091	313.732794532925	-0.704964412723821	0.246821968863279	-2.85616558351951	0.00428791446647394	0.0267360184052145	799355	14.535469	799355	profilin 1	pfn1	NA
ENSDARG00000088171	23.2069766777663	-0.782453322453224	0.301230844117498	-2.59752059834889	0.009389948819052	0.0472067376364449	ENSDARG00000088171	14.831809	NA	circadian associated repressor of transcription b	ciartb	NA
ENSDARG00000088202	11.5141196083246	-1.12590752939878	0.363022920862776	-3.10147779848969	0.00192557311221104	0.0150797144501854	553811	14.552193	553811	SH3 domain containing 19	sh3d19	NA
ENSDARG00000088238	164.364295031393	-0.330517169810409	0.110346423204582	-2.99526853895056	0.00274203319838335	0.0194722931995395	567884	14.833097	567884	KAT8 regulatory NSL complex subunit 1b	kansl1b	NA
ENSDARG00000088246	113.789584755196	0.648980362611071	0.1369561542199	4.73859949052785	2.15200364716618e-06	7.26226300429479e-05	373077	14.543775	373077	THO complex 1	thoc1	NA
ENSDARG00000088318	131.104397398361	0.365812487394022	0.140880044577398	2.5966238759461	0.00941449516688134	0.0472079916087635	563733	14.802482	563733	ubiquitin associated protein 2a	ubap2a	NA
ENSDARG00000088492	215.878128101489	-0.717004765122873	0.219013625756643	-3.2737906723647	0.00106115188715712	0.00976146933402317	100334259	14.842841	100334259	centriolin	cntrl	NA
ENSDARG00000088524	112.906208330051	1.09513916862266	0.307910029416508	3.55668560292746	0.000375563170789565	0.00451913579117151	572757	14.543775	572757	acyl-CoA thioesterase 17	acot17	NA
ENSDARG00000088612	34.8801203948029	-1.37376761001878	0.313401142583777	-4.38341608678582	1.16832663207378e-05	0.000288274483657309	100004948	14.809612	100004948	si:ch211-153b23.7	si:ch211-153b23.7	NA
ENSDARG00000088625	16.6594159994893	-4.37760497193875	0.973578892145514	-4.49640497267936	6.91120460239721e-06	0.000186895633388487	794295	14.82342	794295	si:ch211-142d6.2	si:ch211-142d6.2	NA
ENSDARG00000088650	105.643118164774	1.30229067046756	0.29541142602066	4.40839641177752	1.0413880801043e-05	0.000262842012301325	101882035	14.82342	101882035	si:ch211-208k15.1	si:ch211-208k15.1	NA
ENSDARG00000088775	13.7159626202638	-1.35800524004793	0.321146033262176	-4.22862218241784	2.35126814430002e-05	0.000507133796428488	ENSDARG00000088775	14.82419	NA	NA	CABZ01059406.1	NA
ENSDARG00000088899	68.5976055512021	-0.461609303075729	0.15214424527675	-3.0340240752193	0.00241315171587242	0.017870007969312	559303	14.799049	559303	Ral GTPase activating protein, beta subunit (non-catalytic)	ralgapb	NA
ENSDARG00000088933	130.931079085702	0.655093019817281	0.184940368370887	3.54218511397971	0.000396826888472051	0.00470493088843556	100001834	14.8804035	100001834	golgi transport 1A	golt1a	NA
ENSDARG00000088972	216.910183544409	-0.462379956833646	0.157893188608642	-2.92843510798754	0.00340672936601776	0.0227021596640842	796120	14.833017	796120	si:dkey-238d18.4	si:dkey-238d18.4	NA
ENSDARG00000089019	103.654639334414	-0.457678762910408	0.141808673652387	-3.22743842899417	0.00124903918596379	0.0109573567979373	568697	14.535469	568697	si:ch211-175m2.5	si:ch211-175m2.5	NA
ENSDARG00000089026	194.135443838847	-1.34191434808497	0.372435433718721	-3.60307915572404	0.000314469712232769	0.00394797985875647	798821	14.838869	798821	si:dkey-183k8.2	si:dkey-183k8.2	NA
ENSDARG00000089050	95.821567932615	-3.58377918833928	1.0190418833189	-3.5168124558996	0.00043676226383326	0.0050683666918965	ENSDARG00000089050	14.8207245	NA	CUB and zona pellucida-like domains 1, tandem duplicate 1	cuzd1.1	NA
ENSDARG00000089071	43.5112050054768	-1.2224213588867	0.231192254716364	-5.28746674661057	1.24021897719306e-07	7.15488233747329e-06	100148935	14.880765	100148935	Usher syndrome 1C binding protein 1	ushbp1	NA
ENSDARG00000089107	214.539794128538	-0.984950387415092	0.248910609383932	-3.95704461876054	7.58827611092756e-05	0.00133041917632254	ENSDARG00000089107	14.834426	NA	si:ch1073-189o9.1	si:ch1073-189o9.1	NA
ENSDARG00000089138	156.784708648485	-0.429684425688506	0.102943616512011	-4.17397834122499	2.99326224946622e-05	0.000619886703457834	ENSDARG00000089138	14.842841	NA	si:ch1073-440b2.1	si:ch1073-440b2.1	NA
ENSDARG00000089303	45.4909790579254	0.603860895304922	0.199283337720674	3.03016249231697	0.00244422198403313	0.0180332651886704	562425	14.833983	562425	wu:fa25f02	wu:fa25f02	NA
ENSDARG00000089355	104.992403888224	0.656286843879212	0.17099771352414	3.83798607802182	0.000124047513290458	0.00193664384473441	100004621	14.833489	100004621	si:dkeyp-121d4.3	si:dkeyp-121d4.3	NA
ENSDARG00000089390	164.672989744159	-1.00620653763075	0.273615797720564	-3.67744313746957	0.000235583570035855	0.00318182268783098	101887155	14.831809	101887155	patatin-like phospholipase domain containing 2	pnpla2	NA
ENSDARG00000089428	29.009648595817	0.583518068196713	0.210043170007473	2.77808637232028	0.00546800812051533	0.0318945201637185	553657	14.545806	553657	RAB12, member RAS oncogene family	rab12	NA
ENSDARG00000089463	47.4065482424115	-0.795770017398392	0.292822894303305	-2.71758128506897	0.00657610001884403	0.036411998047667	100148871	14.566872	100148871	DEXH (Asp-Glu-X-His) box polypeptide 58	dhx58	NA
ENSDARG00000089477	17.5316613415843	-0.777979566731422	0.268320301628401	-2.89944354568016	0.00373825657319656	0.0241541218049473	103911757	14.853864	103911757	uncharacterized LOC103911757	LOC103911757	NA
ENSDARG00000089477	17.5316613415843	-0.777979566731422	0.268320301628401	-2.89944354568016	0.00373825657319656	0.0241541218049473	100004401	15.245339	100004401	si:ch211-132g1.3	si:ch211-132g1.3	NA
ENSDARG00000089529	177.025205111153	0.643000601027857	0.137789832367801	4.66653155736121	3.06326616767339e-06	9.64891710642265e-05	793871	14.593083	793871	desumoylating isopeptidase 1b	desi1b	NA
ENSDARG00000089626	111.085267665429	0.835434461470074	0.276267532794911	3.02400522065784	0.00249452133890008	0.0182604991062081	415227	14.543538	415227	prostaglandin E synthase 3b (cytosolic)	ptges3b	NA
ENSDARG00000089681	201.757948532683	0.359794652163703	0.118879679583652	3.02654459890705	0.00247366326221668	0.0181516840834374	393667	14.536508	393667	basic transcription factor 3-like 4	btf3l4	NA
ENSDARG00000089705	31.6820105545336	0.694652464867878	0.267784451099282	2.59407318840306	0.00948462942842504	0.0474231863540049	ENSDARG00000089705	14.802482	NA	ATP binding cassette subfamily F member 3	ABCF3	NA
ENSDARG00000089767	298.962640137834	1.31186199676284	0.228279699858488	5.74673086383096	9.09853757432348e-09	8.04589654838898e-07	553950	14.852479	553950	ring finger protein 130	rnf130	NA
ENSDARG00000089787	310.577217870428	0.429495077380955	0.11487374752721	3.73884448471764	0.000184868039850546	0.00260947670139125	562093	14.837396	562093	CREB/ATF bZIP transcription factor	crebzf	NA
ENSDARG00000089791	928.511658607682	1.29826560615591	0.408193230729577	3.18051723649479	0.00147012393287367	0.0123512839436647	393226	14.543538	393226	solute carrier family 25 (mitochondrial folate carrier), member 32a	slc25a32a	NA
ENSDARG00000089844	132.718137436524	-0.352272985438325	0.130759048103018	-2.69406202132023	0.00705870285301598	0.0383804764571362	ENSDARG00000089844	14.802482	NA	scavenger receptor class B, member 2c	scarb2c	NA
ENSDARG00000089871	22.2666867753512	-0.749689810309617	0.270369793459628	-2.77283124241304	0.00555709308474109	0.0322768791979135	100001168	14.839825	100001168	junctional cadherin 5 associated a	jcada	NA
ENSDARG00000089904	70.8686693967565	-0.621051819351576	0.190360328822368	-3.26250654846841	0.00110431621413511	0.0100285899488218	100536657	14.839874	100536657	adhesion G protein-coupled receptor E1-like	LOC100536657	NA
ENSDARG00000089933	117.02868743703	0.678330870699926	0.161245664210764	4.20681618957072	2.58993626854067e-05	0.000551442493732342	798492	14.837396	798492	RAS protein activator like 3	rasal3	NA
ENSDARG00000090120	35.904547378671	0.823367509071792	0.242057441137369	3.40153768957892	0.000670078880586141	0.00700431892864634	ENSDARG00000090120	14.834426	NA	si:dkey-248g21.1	si:dkey-248g21.1	NA
ENSDARG00000090185	174.169864791524	-1.01441244515229	0.36416134690167	-2.78561262413773	0.00534266766654869	0.0313596990214328	100333708	14.832098	100333708	si:dkeyp-73b11.8	si:dkeyp-73b11.8	NA
ENSDARG00000090232	115.858812858693	0.651697509705853	0.132029975440388	4.93598145066758	7.97486873031044e-07	3.23128878487328e-05	ENSDARG00000090232	14.839874	NA	ClpB homolog, mitochondrial AAA ATPase chaperonin	clpb	NA
ENSDARG00000090338	44.3992732055012	-0.966063022953809	0.296611578431827	-3.2569970061902	0.00112597620510956	0.0101648298993311	560397	14.852479	560397	family with sequence similarity 20, member Cb	fam20cb	NA
ENSDARG00000090346	71.8064671360469	-0.615389477780004	0.219485999837702	-2.80377554028526	0.00505080540951175	0.0302026197118632	100332010	14.837396	100332010	zmp:0000000991	zmp:0000000991	NA
ENSDARG00000090431	27.6135535071202	0.763381282217151	0.268568373831175	2.84240944429675	0.00447739486786018	0.0276753259306766	NA	NA	NA	NA	NA	TRUE
ENSDARG00000090454	119.779279137376	-0.448281228974046	0.138825855211773	-3.22909034696895	0.00124184655848573	0.0109078401000045	322104	14.543792	322104	guanine nucleotide binding protein (G protein), beta polypeptide 1a	gnb1a	NA
ENSDARG00000090581	49.9966981109282	1.17341218740643	0.276705918818412	4.24064722726976	2.22876188427591e-05	0.000483896957491086	570351	14.566941	570351	WD repeat domain 4	wdr4	NA
ENSDARG00000090675	157.254211195523	0.378808900958647	0.13496664542319	2.80668530932872	0.00500541135252526	0.0299607502647448	449850	14.8207245	449850	si:ch73-40i7.5	si:ch73-40i7.5	NA
ENSDARG00000090696	13.6959531059398	-1.9999689087389	0.542500202701153	-3.68657725615749	0.000227290462579348	0.00311143949621334	101882109	14.825785	101882109	transmembrane channel like 3	tmc3	NA
ENSDARG00000090764	133.830119225812	-0.396515323447399	0.136647550464655	-2.90173751449691	0.00371099341523841	0.0240292278063139	393594	14.833816	393594	breast carcinoma amplified sequence 3	bcas3	NA
ENSDARG00000090783	15.2917200090263	-1.44756475851163	0.472123687250643	-3.06607102672893	0.00216891785683206	0.0164536446125733	405825	14.595437	405825	microfibril associated protein 4	mfap4	NA
ENSDARG00000090814	36.2941841464888	-2.61696404626574	0.381490998976391	-6.85983169534151	6.89417234211035e-12	1.81571517227537e-09	ENSDARG00000090814	14.838869	NA	si:dkey-18a10.3	si:dkey-18a10.3	NA
ENSDARG00000090821	81.8851751446935	0.721701353004817	0.172467489462076	4.18456461131194	2.85713176757777e-05	0.000597203747224895	553571	14.817384	553571	TP53 regulating kinase	tp53rk	NA
ENSDARG00000090871	23.4456226989835	0.795862877204265	0.238308378005941	3.33963448479526	0.000838887222386886	0.00823429305725507	ENSDARG00000090871	14.82419	NA	si:dkey-210j14.4	si:dkey-210j14.4	NA
[truncated: 431 more rows]
