# Supplementary material for: Parental high dietary arachidonic acid levels modulated the hepatic transcriptome of adult zebrafish (Danio rerio) progeny
Source: PLoS One. 2018 Aug 2;13(8):e0201278. doi: 10.1371/journal.pone.0201278 (PMC6071982; doi:10.1371/journal.pone.0201278)
Supplement: S14 Table — (XLSX) [file pone.0201278.s019.xlsx]

## Sheet: S14 Table
S14 Table. Functional annotation of annotated differentially expressed genes between both F0 and F1 control and between F0 and F1 high ARA groups for KEGG pathways and GO terms.
legend:
CC= cellular component
BP=biological process
MF=molecular function

## Sheet: KEGG ctrl F0F1
	Description	Count	pvalue	p.adjust	qvalue	geneID
dre01230	Biosynthesis of amino acids	9	0.000171754	0.0200952	0.0173562	103909643/266987/323107/393970/407673/550259/553283/560753/568448
dre01040	Biosynthesis of unsaturated fatty acids	4	0.00209094	0.0839574	0.0725138	140615/327417/449662/553326
dre01212	Fatty acid metabolism	6	0.00215275	0.0839574	0.0725138	100000859/140615/327417/449662/553326/559001
dre00330	Arginine and proline metabolism	6	0.00303042	0.0886398	0.076558	114426/447920/556522/558050/563281/792097
dre00260	Glycine, serine and threonine metabolism	5	0.00407382	0.0953274	0.0823341	100331020/266987/322228/323107/558050
dre01210	2-Oxocarboxylic acid metabolism	3	0.0105712	0.136867	0.118212	103909643/393970/568448
dre01200	Carbon metabolism	8	0.0111087	0.136867	0.118212	100000859/323107/407673/445494/550259/553283/560753/568448
dre00140	Steroid hormone biosynthesis	4	0.0112965	0.136867	0.118212	140634/327417/561372/565370
dre00980	Metabolism of xenobiotics by cytochrome P450	4	0.0112965	0.136867	0.118212	140634/373866/449784/564619
dre00480	Glutathione metabolism	5	0.011698	0.136867	0.118212	114426/393191/449784/563855/564619
dre04140	Autophagy - animal	9	0.0130012	0.138285	0.119437	100332293/114401/30262/321453/321622/393902/553656/555521/558314
dre00561	Glycerolipid metabolism	5	0.0194785	0.189916	0.16403	378960/393096/447920/557680/799099
dre00270	Cysteine and methionine metabolism	4	0.0266638	0.237961	0.205526	266987/322228/436747/792097
dre00380	Tryptophan metabolism	4	0.028474	0.237961	0.205526	100000859/140634/447920/558050
dre00790	Folate biosynthesis	3	0.0318081	0.24268	0.209602	373866/406746/566323
dre00010	Glycolysis / Gluconeogenesis	5	0.033187	0.24268	0.209602	323107/436747/447920/550259/560753
dre00760	Nicotinate and nicotinamide metabolism	3	0.03758	0.250397	0.216268	393330/393864/562399
dre00030	Pentose phosphate pathway	3	0.0406532	0.250397	0.216268	407673/445494/550259
dre04068	FoxO signaling pathway	8	0.0406628	0.250397	0.216268	100151416/30262/30739/393707/403045/406304/553656/768121
dre00350	Tyrosine metabolism	3	0.0438496	0.25652	0.221556	558050/561372/565370
dre00982	Drug metabolism - cytochrome P450	3	0.0471678	0.262792	0.226973	449784/558050/564619
dre00592	alpha-Linolenic acid metabolism	2	0.0647249	0.344219	0.297301	140615/449662
dre00983	Drug metabolism - other enzymes	4	0.0703067	0.352727	0.30465	338306/449784/503707/564619
dre00051	Fructose and mannose metabolism	3	0.0778958	0.352727	0.30465	386663/550259/560753
dre00100	Steroid biosynthesis	2	0.0780081	0.352727	0.30465	564424/793309
dre03320	PPAR signaling pathway	4	0.0798249	0.352727	0.30465	100000859/140615/449662/553512
dre04810	Regulation of actin cytoskeleton	10	0.0843485	0.352727	0.30465	100000160/30262/321099/403045/405864/406363/553656/557797/563030/735292
dre00071	Fatty acid degradation	3	0.0912007	0.352727	0.30465	100000859/447920/449662
dre00620	Pyruvate metabolism	3	0.0912007	0.352727	0.30465	436747/447920/553283
dre00531	Glycosaminoglycan degradation	2	0.0920569	0.352727	0.30465	327635/560126
dre04115	p53 signaling pathway	4	0.0934576	0.352727	0.30465	100004133/100151416/406304/436933
dre00220	Arginine biosynthesis	2	0.114354	0.405437	0.350175	103909643/393970
dre00340	Histidine metabolism	2	0.114354	0.405437	0.350175	447920/558050
dre00280	Valine, leucine and isoleucine degradation	3	0.136084	0.46829	0.404461	100000859/445182/447920
dre05168	Herpes simplex infection	7	0.145756	0.487241	0.420829	100145909/140633/368878/393426/406204/436883/563926
dre04330	Notch signaling pathway	3	0.169439	0.539507	0.465971	30158/334026/692064
dre00640	Propanoate metabolism	2	0.170613	0.539507	0.465971	100000859/436747
dre00020	Citrate cycle (TCA cycle)	2	0.187445	0.560461	0.484069	553283/568448
dre00062	Fatty acid elongation	2	0.195946	0.560461	0.484069	327417/553326
dre00410	beta-Alanine metabolism	2	0.195946	0.560461	0.484069	100000859/447920
dre04910	Insulin signaling pathway	6	0.197564	0.560461	0.484069	30262/445073/541523/553656/559001/768121
dre04210	Apoptosis	6	0.201191	0.560461	0.484069	114401/321453/368704/406304/553656/560883
dre00564	Glycerophospholipid metabolism	4	0.209083	0.566616	0.489385	322605/557680/565971/799099
dre03410	Base excision repair	2	0.213086	0.566616	0.489385	321622/393253
dre04012	ErbB signaling pathway	4	0.238948	0.59793	0.516431	100151416/403045/553656/797938
dre04120	Ubiquitin mediated proteolysis	5	0.240591	0.59793	0.516431	100004133/394002/445073/559634/564991
dre00830	Retinol metabolism	2	0.247732	0.59793	0.516431	140634/393539
dre00310	Lysine degradation	3	0.248087	0.59793	0.516431	100000859/447920/559560
dre04060	Cytokine-cytokine receptor interaction	6	0.250415	0.59793	0.516431	100134976/114447/30739/403045/544667/567241
dre04672	Intestinal immune network for IgA production	2	0.256435	0.600058	0.518269	114447/368878
dre04218	Cellular senescence	6	0.270219	0.612216	0.528769	100151416/30739/406304/553656/65239/768121
dre03420	Nucleotide excision repair	2	0.273855	0.612216	0.528769	100004133/394002
dre00770	Pantothenate and CoA biosynthesis	1	0.281542	0.612216	0.528769	562399
dre00565	Ether lipid metabolism	2	0.282561	0.612216	0.528769	322605/557680
dre04137	Mitophagy - animal	3	0.305382	0.624134	0.539063	114401/393902/553656
dre03013	RNA transport	5	0.308002	0.624134	0.539063	192325/322256/324365/403025/541523
dre04145	Phagosome	5	0.308002	0.624134	0.539063	321453/368878/393902/405864/557797
dre00061	Fatty acid biosynthesis	1	0.314734	0.624134	0.539063	559001
dre00360	Phenylalanine metabolism	1	0.314734	0.624134	0.539063	558050
dre00590	Arachidonic acid metabolism	2	0.334482	0.647397	0.559155	373866/393191
dre04146	Peroxisome	3	0.337532	0.647397	0.559155	100000859/393539/449662
dre03015	mRNA surveillance pathway	3	0.34396	0.649087	0.560615	192325/403025/449548
dre04920	Adipocytokine signaling pathway	3	0.356803	0.662634	0.572315	393426/555521/567241
dre04010	MAPK signaling pathway	10	0.370713	0.673101	0.581356	100000160/30262/30739/394099/403045/406304/406714/544667/553656/65239
dre00053	Ascorbate and aldarate metabolism	1	0.37662	0.673101	0.581356	447920
dre03040	Spliceosome	4	0.381153	0.673101	0.581356	100145909/192325/436883/492511
dre00120	Primary bile acid biosynthesis	1	0.391204	0.673101	0.581356	327462
dre00532	Glycosaminoglycan biosynthesis - chondroitin sulfate / dermatan sulfate	1	0.391204	0.673101	0.581356	563748
dre04514	Cell adhesion molecules (CAMs)	4	0.418343	0.709365	0.612677	100004384/368878/405864/557797
dre00650	Butanoate metabolism	1	0.432954	0.713499	0.616248	100000859
dre04144	Endocytosis	8	0.436378	0.713499	0.616248	100000160/100151129/114447/30739/393902/394099/553656/559634
dre04142	Lysosome	4	0.444615	0.713499	0.616248	321453/327635/368704/560126
dre04350	TGF-beta signaling pathway	3	0.445175	0.713499	0.616248	30739/449548/553816
dre00601	Glycosphingolipid biosynthesis - lacto and neolacto series	1	0.459196	0.726025	0.627066	336526
dre00230	Purine metabolism	5	0.484116	0.754139	0.651348	338306/553701/562399/751742/799942
dre04621	NOD-like receptor signaling pathway	4	0.490952	0.754139	0.651348	114401/368359/557086/793673
dre00514	Other types of O-glycan biosynthesis	1	0.496314	0.754139	0.651348	30158
dre00860	Porphyrin and chlorophyll metabolism	1	0.530902	0.786272	0.679102	791518
dre04136	Autophagy - other	1	0.530902	0.786272	0.679102	100332293
dre00052	Galactose metabolism	1	0.541899	0.792105	0.684139	550259
dre00630	Glyoxylate and dicarboxylate metabolism	1	0.55264	0.792105	0.684139	568448
dre04912	GnRH signaling pathway	3	0.567537	0.792105	0.684139	553656/65239/797938
dre04933	AGE-RAGE signaling pathway in diabetic complications	3	0.567537	0.792105	0.684139	30739/553656/768121
dre00500	Starch and sucrose metabolism	1	0.573378	0.792105	0.684139	562399
dre04530	Tight junction	5	0.575461	0.792105	0.684139	327272/405864/406714/449548/559634
dre02010	ABC transporters	1	0.602708	0.819963	0.7082	558924
dre03022	Basal transcription factors	1	0.612033	0.823079	0.710891	325832
dre04130	SNARE interactions in vesicular transport	1	0.630036	0.837661	0.723486	325484
dre04216	Ferroptosis	1	0.655496	0.86172	0.744265	791518
dre04510	Focal adhesion	5	0.682873	0.887735	0.766734	403045/405864/406714/544667/553656
dre00240	Pyrimidine metabolism	2	0.708233	0.910586	0.786471	503707/562399
dre04340	Hedgehog signaling pathway	1	0.728445	0.926392	0.800123	394099
dre00520	Amino sugar and nucleotide sugar metabolism	1	0.747174	0.939993	0.81187	336553
dre00600	Sphingolipid metabolism	1	0.758942	0.94464	0.815884	557680
dre04625	C-type lectin receptor signaling pathway	2	0.78314	0.95165	0.821938	393426/553656
dre04141	Protein processing in endoplasmic reticulum	3	0.800316	0.95165	0.821938	360149/373100/393877
dre04217	Necroptosis	3	0.803358	0.95165	0.821938	321622/335519/793673
dre04540	Gap junction	2	0.808771	0.95165	0.821938	403045/553656
dre04150	mTOR signaling pathway	3	0.809326	0.95165	0.821938	30262/541523/553656
dre04370	VEGF signaling pathway	1	0.835463	0.95165	0.821938	553656
dre03008	Ribosome biogenesis in eukaryotes	1	0.839349	0.95165	0.821938	678588
dre04110	Cell cycle	2	0.840736	0.95165	0.821938	100151416/406304
dre04114	Oocyte meiosis	2	0.840736	0.95165	0.821938	30262/449548
dre04261	Adrenergic signaling in cardiomyocytes	3	0.854174	0.95165	0.821938	100037315/30616/449548
dre04512	ECM-receptor interaction	1	0.860826	0.95165	0.821938	405864
dre03018	RNA degradation	1	0.873535	0.95165	0.821938	550259
dre00562	Inositol phosphate metabolism	1	0.879451	0.95165	0.821938	560753
dre04520	Adherens junction	1	0.900488	0.95165	0.821938	30739
dre04620	Toll-like receptor signaling pathway	1	0.900488	0.95165	0.821938	65239
dre05132	Salmonella infection	1	0.900488	0.95165	0.821938	393902
dre04260	Cardiac muscle contraction	1	0.902848	0.95165	0.821938	30616
dre04914	Progesterone-mediated oocyte maturation	1	0.923589	0.96482	0.833313	30262
dre04916	Melanogenesis	1	0.962918	0.996434	0.860617	553656
dre04270	Vascular smooth muscle contraction	1	0.970884	0.996434	0.860617	555521
dre04371	Apelin signaling pathway	1	0.985942	0.998376	0.862295	553656
dre04080	Neuroactive ligand-receptor interaction	3	0.996401	0.998376	0.862295	100037315/561773/567241
dre04020	Calcium signaling pathway	1	0.998376	0.998376	0.862295	100037315

## Sheet: CC ctrl F0F1
	Description	Count	pvalue	p.adjust	qvalue	geneID
GO:0016459	myosin complex	5	0.00875824	0.555428	0.551511	myo9aa/myh7/mybpc1/myo9b/myo18aa
GO:0043235	receptor complex	6	0.0199825	0.555428	0.551511	ahr1a/tgfbr2b/egf/itgb1b.2/itgb2/itgb1b.1
GO:0008305	integrin complex	3	0.0207184	0.555428	0.551511	itgb1b.2/itgb2/itgb1b.1
GO:0098636	protein complex involved in cell adhesion	3	0.0207184	0.555428	0.551511	itgb1b.2/itgb2/itgb1b.1
GO:0034364	high-density lipoprotein particle	2	0.0217716	0.555428	0.551511	apoa4b.3/apoa4b.1
GO:0042627	chylomicron	2	0.0217716	0.555428	0.551511	apoa4b.3/apoa4b.1
GO:0005667	transcription factor complex	7	0.0280702	0.555428	0.551511	cry1aa/ahr1a/brf1a/nfe2l2a/tfdp1b/taf1a/cry2
GO:0032994	protein-lipid complex	2	0.0286303	0.555428	0.551511	apoa4b.3/apoa4b.1
GO:0034358	plasma lipoprotein particle	2	0.0286303	0.555428	0.551511	apoa4b.3/apoa4b.1
GO:1990777	lipoprotein particle	2	0.0286303	0.555428	0.551511	apoa4b.3/apoa4b.1
GO:0005686	U2 snRNP	2	0.0402855	0.71049	0.705478	snrpd3/snrpa1
GO:0072562	blood microparticle	3	0.0513931	0.830855	0.824994	apoa4b.3/apoa4b.1/ahsg2
GO:0005777	peroxisome	3	0.0687676	0.952922	0.9462	ehhadh/acox1/uraha
GO:0042579	microbody	3	0.0687676	0.952922	0.9462	ehhadh/acox1/uraha
GO:0055037	recycling endosome	2	0.134964	0.98654	0.979581	rab11fip4b/slc9a7
GO:0030018	Z disc	2	0.159743	0.98654	0.979581	bag3/mybpc1
GO:0005579	membrane attack complex	1	0.164924	0.98654	0.979581	c7b
GO:0005859	muscle myosin complex	1	0.164924	0.98654	0.979581	mybpc1
GO:0016460	myosin II complex	1	0.164924	0.98654	0.979581	mybpc1
GO:0005768	endosome	6	0.17694	0.98654	0.979581	fgfr4/rab11fip4b/rab7/slc9a7/snx17/epha4a
GO:0000243	commitment complex	1	0.179845	0.98654	0.979581	snrpd3
GO:0005769	early endosome	2	0.185267	0.98654	0.979581	snx17/epha4a
GO:0031982	vesicle	11	0.194175	0.98654	0.979581	fgfr4/doc2d/rab11fip4b/cpn1/rab7/gipc2/itm2bb/zgc:91968/slc9a7/snx17/epha4a
GO:0098802	plasma membrane receptor complex	3	0.19422	0.98654	0.979581	itgb1b.2/itgb2/itgb1b.1
GO:0000795	synaptonemal complex	1	0.1945	0.98654	0.979581	syce2
GO:0032154	cleavage furrow	1	0.1945	0.98654	0.979581	rab11fip4b
GO:0046930	pore complex	1	0.1945	0.98654	0.979581	c7b
GO:0099086	synaptonemal structure	1	0.1945	0.98654	0.979581	syce2
GO:0005789	endoplasmic reticulum membrane	9	0.202704	0.98654	0.979581	erap2/fads2/cyp1a/hsd17b12a/ssr1/zgc:63863/derl3/hacd1/soat1
GO:0031674	I band	2	0.204764	0.98654	0.979581	bag3/mybpc1
GO:0098827	endoplasmic reticulum subcompartment	9	0.204843	0.98654	0.979581	erap2/fads2/cyp1a/hsd17b12a/ssr1/zgc:63863/derl3/hacd1/soat1
GO:0031235	intrinsic component of the cytoplasmic side of the plasma membrane	1	0.208894	0.98654	0.979581	rasal3
GO:0005802	trans-Golgi network	2	0.211314	0.98654	0.979581	yipf6/chac1
GO:0042175	nuclear outer membrane-endoplasmic reticulum membrane network	9	0.217868	0.98654	0.979581	erap2/fads2/cyp1a/hsd17b12a/ssr1/zgc:63863/derl3/hacd1/soat1
GO:0031201	SNARE complex	2	0.231074	0.98654	0.979581	vamp5/napab
GO:0005689	U12-type spliceosomal complex	1	0.236918	0.98654	0.979581	snrpd3
GO:0005844	polysome	1	0.236918	0.98654	0.979581	rwdd1
GO:0030427	site of polarized growth	1	0.236918	0.98654	0.979581	frya
GO:0042470	melanosome	1	0.236918	0.98654	0.979581	zgc:91968
GO:0048770	pigment granule	1	0.236918	0.98654	0.979581	zgc:91968
GO:0044432	endoplasmic reticulum part	9	0.244841	0.98654	0.979581	erap2/fads2/cyp1a/hsd17b12a/ssr1/zgc:63863/derl3/hacd1/soat1
GO:0005682	U5 snRNP	1	0.250556	0.98654	0.979581	snrpd3
GO:0031430	M band	1	0.250556	0.98654	0.979581	mybpc1
GO:0097525	spliceosomal snRNP complex	2	0.257581	0.98654	0.979581	snrpd3/snrpa1
GO:0030139	endocytic vesicle	1	0.263952	0.98654	0.979581	rab11fip4b
GO:0031519	PcG protein complex	1	0.263952	0.98654	0.979581	pcgf5b
GO:0032153	cell division site	1	0.263952	0.98654	0.979581	rab11fip4b
GO:0032155	cell division site part	1	0.263952	0.98654	0.979581	rab11fip4b
GO:0080008	Cul4-RING E3 ubiquitin ligase complex	1	0.263952	0.98654	0.979581	ddb2
GO:0005794	Golgi apparatus	11	0.269739	0.98654	0.979581	lfng/chpt1/rab18a/b3gnt5a/cpn1/itm2bb/st6galnac5b/yipf6/chst7/chac1/limk1a
GO:0030532	small nuclear ribonucleoprotein complex	2	0.270859	0.98654	0.979581	snrpd3/snrpa1
GO:0044798	nuclear transcription factor complex	2	0.277497	0.98654	0.979581	brf1a/taf1a
GO:0036477	somatodendritic compartment	2	0.284131	0.98654	0.979581	cpn1/casc3
GO:0120114	Sm-like protein family complex	2	0.29738	0.98654	0.979581	snrpd3/snrpa1
GO:0005685	U1 snRNP	1	0.302723	0.98654	0.979581	snrpd3
GO:0098791	Golgi subcompartment	7	0.303959	0.98654	0.979581	lfng/chpt1/b3gnt5a/st6galnac5b/yipf6/chst7/chac1
GO:0048471	perinuclear region of cytoplasm	2	0.303991	0.98654	0.979581	ndor1/casc3
GO:0000139	Golgi membrane	6	0.317436	0.98654	0.979581	lfng/chpt1/b3gnt5a/st6galnac5b/yipf6/chst7
GO:0030496	midbody	1	0.327433	0.98654	0.979581	rab11fip4b
GO:0031672	A band	1	0.327433	0.98654	0.979581	mybpc1
GO:0071010	prespliceosome	1	0.327433	0.98654	0.979581	snrpd3
GO:0000793	condensed chromosome	2	0.343364	0.98654	0.979581	syce2/cfdp1
GO:0031410	cytoplasmic vesicle	9	0.344018	0.98654	0.979581	fgfr4/doc2d/rab11fip4b/cpn1/rab7/zgc:91968/slc9a7/snx17/epha4a
GO:0097708	intracellular vesicle	9	0.344018	0.98654	0.979581	fgfr4/doc2d/rab11fip4b/cpn1/rab7/zgc:91968/slc9a7/snx17/epha4a
GO:0097526	spliceosomal tri-snRNP complex	1	0.35127	0.98654	0.979581	snrpd3
GO:0000777	condensed chromosome kinetochore	1	0.362871	0.98654	0.979581	cfdp1
GO:0015629	actin cytoskeleton	5	0.364045	0.98654	0.979581	myo9aa/myh7/mybpc1/myo9b/myo18aa
GO:0071011	precatalytic spliceosome	1	0.374265	0.98654	0.979581	snrpd3
GO:0044431	Golgi apparatus part	7	0.376129	0.98654	0.979581	lfng/chpt1/b3gnt5a/st6galnac5b/yipf6/chst7/chac1
GO:0005741	mitochondrial outer membrane	2	0.394672	0.98654	0.979581	bcl2l1/lpin1
GO:0000779	condensed chromosome, centromeric region	1	0.407243	0.98654	0.979581	cfdp1
GO:0016323	basolateral plasma membrane	1	0.407243	0.98654	0.979581	numb
GO:0030141	secretory granule	1	0.407243	0.98654	0.979581	cpn1
GO:0030173	integral component of Golgi membrane	1	0.417846	0.98654	0.979581	lfng
GO:0031228	intrinsic component of Golgi membrane	1	0.417846	0.98654	0.979581	lfng
GO:0005684	U2-type spliceosomal complex	1	0.42826	0.98654	0.979581	snrpd3
GO:0019013	viral nucleocapsid	1	0.42826	0.98654	0.979581	snrpd3
GO:0019028	viral capsid	1	0.42826	0.98654	0.979581	snrpd3
GO:0019867	outer membrane	2	0.431934	0.98654	0.979581	bcl2l1/lpin1
GO:0031968	organelle outer membrane	2	0.431934	0.98654	0.979581	bcl2l1/lpin1
GO:0005758	mitochondrial intermembrane space	1	0.438488	0.98654	0.979581	opa1
GO:0031970	organelle envelope lumen	1	0.438488	0.98654	0.979581	opa1
GO:0032040	small-subunit processome	1	0.438488	0.98654	0.979581	emg1
GO:0019012	virion	1	0.458401	0.98654	0.979581	snrpd3
GO:0044423	virion part	1	0.458401	0.98654	0.979581	snrpd3
GO:0042613	MHC class II protein complex	1	0.468092	0.98654	0.979581	si:busm1-266f07.2
GO:0005764	lysosome	3	0.471696	0.98654	0.979581	ctsla/gnsb/ctsc
GO:0000794	condensed nuclear chromosome	1	0.47761	0.98654	0.979581	syce2
GO:0000323	lytic vacuole	3	0.480834	0.98654	0.979581	ctsla/gnsb/ctsc
GO:0030425	dendrite	1	0.496139	0.98654	0.979581	casc3
GO:0042611	MHC protein complex	1	0.496139	0.98654	0.979581	si:busm1-266f07.2
GO:0097447	dendritic tree	1	0.496139	0.98654	0.979581	casc3
GO:0005773	vacuole	4	0.503497	0.98654	0.979581	ctsla/napab/gnsb/ctsc
GO:0043025	neuronal cell body	1	0.505157	0.98654	0.979581	cpn1
GO:0030017	sarcomere	2	0.508193	0.98654	0.979581	bag3/mybpc1
GO:0016607	nuclear speck	1	0.522712	0.98654	0.979581	casc3
GO:0071013	catalytic step 2 spliceosome	1	0.522712	0.98654	0.979581	snrpd3
GO:0044297	cell body	1	0.531256	0.98654	0.979581	cpn1
GO:0030016	myofibril	2	0.535703	0.98654	0.979581	bag3/mybpc1
GO:0098590	plasma membrane region	4	0.537123	0.98654	0.979581	rab11fip4b/cpn1/zgc:91968/numb
GO:0043292	contractile fiber	2	0.541077	0.98654	0.979581	bag3/mybpc1
GO:0044449	contractile fiber part	2	0.541077	0.98654	0.979581	bag3/mybpc1
GO:0099503	secretory vesicle	2	0.541077	0.98654	0.979581	doc2d/cpn1
GO:0031985	Golgi cisterna	1	0.547888	0.98654	0.979581	yipf6
GO:0005930	axoneme	1	0.555983	0.98654	0.979581	drc1
GO:0000776	kinetochore	1	0.563933	0.98654	0.979581	cfdp1
GO:0044452	nucleolar part	1	0.563933	0.98654	0.979581	taf1a
GO:0097014	ciliary plasm	1	0.563933	0.98654	0.979581	drc1
GO:0032838	plasma membrane bounded cell projection cytoplasm	1	0.586941	0.98654	0.979581	drc1
GO:0005770	late endosome	1	0.594338	0.98654	0.979581	rab7
GO:0005795	Golgi stack	1	0.594338	0.98654	0.979581	yipf6
GO:0016324	apical plasma membrane	1	0.601604	0.98654	0.979581	zgc:91968
GO:0099568	cytoplasmic region	2	0.602167	0.98654	0.979581	drc1/frya
GO:0009898	cytoplasmic side of plasma membrane	2	0.606972	0.98654	0.979581	csk/rasal3
GO:0045177	apical part of cell	1	0.608739	0.98654	0.979581	zgc:91968
GO:0031966	mitochondrial membrane	6	0.621957	0.98654	0.979581	bcl2l1/opa1/slc25a47a/slc25a1b/slc25a43/lpin1
GO:0098562	cytoplasmic side of membrane	2	0.634879	0.98654	0.979581	csk/rasal3
GO:0005743	mitochondrial inner membrane	4	0.652646	0.98654	0.979581	opa1/slc25a47a/slc25a1b/slc25a43
GO:0016604	nuclear body	1	0.655246	0.98654	0.979581	casc3
GO:0016591	DNA-directed RNA polymerase II, holoenzyme	1	0.667491	0.98654	0.979581	rpap2
GO:0036464	cytoplasmic ribonucleoprotein granule	1	0.667491	0.98654	0.979581	casc3
GO:0043005	neuron projection	3	0.673148	0.98654	0.979581	casc3/si:dkey-237h12.3/limk1a
GO:0000775	chromosome, centromeric region	1	0.67345	0.98654	0.979581	cfdp1
GO:1990204	oxidoreductase complex	1	0.679302	0.98654	0.979581	cbr4
GO:0005740	mitochondrial envelope	6	0.680878	0.98654	0.979581	bcl2l1/opa1/slc25a47a/slc25a1b/slc25a43/lpin1
GO:0005938	cell cortex	1	0.68505	0.98654	0.979581	frya
GO:0035770	ribonucleoprotein granule	1	0.68505	0.98654	0.979581	casc3
GO:0030684	preribosome	1	0.690696	0.98654	0.979581	emg1
GO:0005581	collagen trimer	1	0.701686	0.98654	0.979581	col5a1
GO:0009986	cell surface	2	0.720393	0.98654	0.979581	si:dkey-19a16.7/tmem206
GO:0000785	chromatin	3	0.727324	0.98654	0.979581	pparda/hist2h2l/nr1d1
GO:0019866	organelle inner membrane	4	0.732167	0.98654	0.979581	opa1/slc25a47a/slc25a1b/slc25a43
GO:0005730	nucleolus	3	0.744689	0.98654	0.979581	taf1a/dedd1/emg1
GO:0070382	exocytic vesicle	1	0.746517	0.98654	0.979581	doc2d
GO:0000786	nucleosome	1	0.755529	0.98654	0.979581	hist2h2l
GO:0098797	plasma membrane protein complex	5	0.758917	0.98654	0.979581	si:busm1-266f07.2/itgb1b.2/itgb2/itgb1b.1/c7b
GO:0010008	endosome membrane	1	0.772607	0.98654	0.979581	rab11fip4b
GO:0044815	DNA packaging complex	1	0.772607	0.98654	0.979581	hist2h2l
GO:0030176	integral component of endoplasmic reticulum membrane	1	0.776687	0.98654	0.979581	hacd1
GO:0044429	mitochondrial part	7	0.779422	0.98654	0.979581	bcl2l1/cbr4/opa1/slc25a47a/slc25a1b/slc25a43/lpin1
GO:0055029	nuclear DNA-directed RNA polymerase complex	1	0.78463	0.98654	0.979581	rpap2
GO:0044427	chromosomal part	5	0.787806	0.98654	0.979581	pparda/hist2h2l/nr1d1/syce2/cfdp1
GO:0000428	DNA-directed RNA polymerase complex	1	0.788495	0.98654	0.979581	rpap2
GO:0030880	RNA polymerase complex	1	0.788495	0.98654	0.979581	rpap2
GO:0098687	chromosomal region	1	0.788495	0.98654	0.979581	cfdp1
GO:0031012	extracellular matrix	3	0.798608	0.98654	0.979581	timp2a/cyr61l2/ahsg2
GO:0031227	intrinsic component of endoplasmic reticulum membrane	1	0.799681	0.98654	0.979581	hacd1
GO:0044440	endosomal part	1	0.803277	0.98654	0.979581	rab11fip4b
GO:0098552	side of membrane	2	0.805005	0.98654	0.979581	csk/rasal3
GO:0097458	neuron part	4	0.805436	0.98654	0.979581	cpn1/casc3/si:dkey-237h12.3/limk1a
GO:0005578	proteinaceous extracellular matrix	2	0.810267	0.98654	0.979581	timp2a/cyr61l2
GO:0031234	extrinsic component of cytoplasmic side of plasma membrane	1	0.832878	0.98654	0.979581	csk
GO:0097060	synaptic membrane	1	0.832878	0.98654	0.979581	cpn1
GO:0044454	nuclear chromosome part	2	0.834726	0.98654	0.979581	hist2h2l/syce2
GO:0012506	vesicle membrane	1	0.838828	0.98654	0.979581	snx17
GO:0030659	cytoplasmic vesicle membrane	1	0.838828	0.98654	0.979581	snx17
GO:0000151	ubiquitin ligase complex	2	0.84149	0.98654	0.979581	ddb2/sharpin
GO:0000790	nuclear chromatin	1	0.841723	0.98654	0.979581	hist2h2l
GO:0032993	protein-DNA complex	1	0.847359	0.98654	0.979581	hist2h2l
GO:0000228	nuclear chromosome	2	0.848003	0.98654	0.979581	hist2h2l/syce2
GO:0005681	spliceosomal complex	1	0.850102	0.98654	0.979581	snrpd3
GO:0005774	vacuolar membrane	1	0.852795	0.98654	0.979581	napab
GO:0044433	cytoplasmic vesicle part	2	0.858319	0.98654	0.979581	rab11fip4b/snx17
GO:0044437	vacuolar part	1	0.860589	0.98654	0.979581	napab
GO:0031301	integral component of organelle membrane	1	0.865555	0.98654	0.979581	lfng
GO:0005694	chromosome	5	0.866779	0.98654	0.979581	pparda/hist2h2l/nr1d1/syce2/cfdp1
GO:0019897	extrinsic component of plasma membrane	1	0.867972	0.98654	0.979581	csk
GO:0031300	intrinsic component of organelle membrane	1	0.870345	0.98654	0.979581	lfng
GO:0030133	transport vesicle	1	0.874965	0.98654	0.979581	doc2d
GO:0005759	mitochondrial matrix	1	0.881589	0.98654	0.979581	cbr4
GO:0031461	cullin-RING ubiquitin ligase complex	1	0.887863	0.98654	0.979581	ddb2
GO:0044463	cell projection part	2	0.896528	0.98654	0.979581	drc1/casc3
GO:0120038	plasma membrane bounded cell projection part	2	0.896528	0.98654	0.979581	drc1/casc3
GO:0005635	nuclear envelope	1	0.914597	0.98654	0.979581	ipo11
GO:0098805	whole membrane	4	0.917799	0.98654	0.979581	rab11fip4b/bcl2l1/napab/lpin1
GO:0044441	ciliary part	1	0.920583	0.98654	0.979581	drc1
GO:0120025	plasma membrane bounded cell projection	4	0.923388	0.98654	0.979581	drc1/casc3/si:dkey-237h12.3/limk1a
GO:0005874	microtubule	1	0.923417	0.98654	0.979581	mid1ip1b
GO:1990904	ribonucleoprotein complex	5	0.931701	0.98654	0.979581	casc3/snrpd3/rwdd1/snrpa1/emg1
GO:0061695	transferase complex, transferring phosphorus-containing groups	1	0.932566	0.98654	0.979581	rpap2
GO:0042995	cell projection	4	0.933556	0.98654	0.979581	drc1/casc3/si:dkey-237h12.3/limk1a
GO:0099080	supramolecular complex	3	0.935687	0.98654	0.979581	mid1ip1b/bag3/mybpc1
GO:0099081	supramolecular polymer	3	0.935687	0.98654	0.979581	mid1ip1b/bag3/mybpc1
GO:0099512	supramolecular fiber	3	0.935687	0.98654	0.979581	mid1ip1b/bag3/mybpc1
GO:0019898	extrinsic component of membrane	1	0.951393	0.993873	0.986862	csk
GO:0044445	cytosolic part	1	0.965609	0.993873	0.986862	narfl
GO:0044451	nucleoplasm part	2	0.971075	0.993873	0.986862	casc3/rpap2
GO:0044456	synapse part	1	0.973836	0.993873	0.986862	cpn1
GO:0005929	cilium	1	0.975676	0.993873	0.986862	drc1
GO:0099513	polymeric cytoskeletal fiber	1	0.98541	0.993873	0.986862	mid1ip1b
GO:0005654	nucleoplasm	2	0.986355	0.993873	0.986862	casc3/rpap2
GO:0045202	synapse	1	0.988704	0.993873	0.986862	cpn1
GO:1990234	transferase complex	3	0.990196	0.993873	0.986862	ddb2/rpap2/sharpin
GO:0015630	microtubule cytoskeleton	2	0.993873	0.993873	0.986862	eml3/mid1ip1b

## Sheet: BP ctrl F0F1
	Description	Count	pvalue	p.adjust	qvalue	geneID
GO:0042752	regulation of circadian rhythm	6	5.78242e-08	8.93962e-05	7.94931e-05	cry1aa/cipca/per2/per1b/nr1d1/si:ch211-132b12.7
GO:0006979	response to oxidative stress	9	6.49269e-06	0.00261632	0.00232649	cry1aa/per2/nfe2l2a/gpx8/naprt/txnl1/sesn1/per1a/hmox1a
GO:0006631	fatty acid metabolic process	12	6.91174e-06	0.00261632	0.00232649	ehhadh/apoa4b.3/fads2/apoa4b.1/hsd17b12a/cbr4/auh/acox1/cyp2k16/hacd1/acot17/lpin1
GO:0032787	monocarboxylic acid metabolic process	16	7.23534e-06	0.00261632	0.00232649	ehhadh/apoa4b.3/fads2/apoa4b.1/pgam1a/hsd17b12a/cbr4/auh/acox1/cyp2k16/pfklb/pcxa/hacd1/tpi1b/acot17/lpin1
GO:0009266	response to temperature stimulus	7	8.46158e-06	0.00261632	0.00232649	per2/hmgb1a/dnaja3a/per1b/bhlhe41/nupr1b/cry2
GO:0006082	organic acid metabolic process	24	4.2476e-05	0.0109447	0.00973223	ehhadh/apoa4b.3/odc1/fads2/cbsb/bhmt/apoa4b.1/pgam1a/hsd17b12a/acy1/cbr4/fpgs/ldhbb/auh/acox1/cyp2k16/pfklb/pcxa/hacd1/tpi1b/chst7/acot17/uraha/lpin1
GO:0009628	response to abiotic stimulus	18	6.68519e-05	0.0147647	0.0131291	cry1aa/slc26a6/cdkn1a/per2/tefa/hmgb1a/ppiab/dnaja3a/per1b/hvcn1/tefb/bhlhe41/per1a/slc26a3.1/dagla/hmox1a/nupr1b/cry2
GO:0043436	oxoacid metabolic process	23	0.000102388	0.0163232	0.014515	ehhadh/apoa4b.3/odc1/fads2/cbsb/bhmt/apoa4b.1/pgam1a/hsd17b12a/acy1/cbr4/fpgs/ldhbb/auh/acox1/cyp2k16/pfklb/pcxa/hacd1/tpi1b/chst7/acot17/lpin1
GO:0006098	pentose-phosphate shunt	4	0.000105584	0.0163232	0.014515	pgam1a/rpia/pgls/tpi1b
GO:0019682	glyceraldehyde-3-phosphate metabolic process	4	0.000105584	0.0163232	0.014515	pgam1a/rpia/pgls/tpi1b
GO:0007623	circadian rhythm	7	0.000121728	0.0171083	0.0152131	cry1aa/cipca/per2/per1b/nr1d1/ciarta/si:ch211-132b12.7
GO:0019752	carboxylic acid metabolic process	22	0.000171335	0.0220737	0.0196284	ehhadh/apoa4b.3/odc1/fads2/cbsb/bhmt/apoa4b.1/pgam1a/hsd17b12a/acy1/cbr4/fpgs/ldhbb/auh/acox1/cyp2k16/pfklb/pcxa/hacd1/tpi1b/acot17/lpin1
GO:0000302	response to reactive oxygen species	4	0.00019515	0.0232079	0.020637	cry1aa/per2/sesn1/per1a
GO:0046394	carboxylic acid biosynthetic process	12	0.000259199	0.0262536	0.0233452	apoa4b.3/fads2/cbsb/bhmt/apoa4b.1/pgam1a/hsd17b12a/cbr4/fpgs/pfklb/hacd1/tpi1b
GO:0044283	small molecule biosynthetic process	17	0.00028414	0.0262536	0.0233452	apoa4b.3/fads2/cbsb/bhmt/apoa4b.1/pgam1a/cnp/hsd17b12a/impdh1b/cbr4/fpgs/upp1/pfklb/pcxa/hacd1/tpi1b/amd1
GO:0016053	organic acid biosynthetic process	12	0.000287774	0.0262536	0.0233452	apoa4b.3/fads2/cbsb/bhmt/apoa4b.1/pgam1a/hsd17b12a/cbr4/fpgs/pfklb/hacd1/tpi1b
GO:0010035	response to inorganic substance	7	0.000288687	0.0262536	0.0233452	cry1aa/mt2/per2/gadd45ba/hvcn1/per1a/aco1
GO:0051156	glucose 6-phosphate metabolic process	4	0.000329442	0.0282954	0.0251609	pgam1a/rpia/pgls/tpi1b
GO:0048511	rhythmic process	7	0.000350833	0.0285016	0.0253442	cry1aa/cipca/per2/per1b/nr1d1/ciarta/si:ch211-132b12.7
GO:0072330	monocarboxylic acid biosynthetic process	9	0.000368714	0.0285016	0.0253442	apoa4b.3/fads2/apoa4b.1/pgam1a/hsd17b12a/cbr4/pfklb/hacd1/tpi1b
GO:0006081	cellular aldehyde metabolic process	5	0.000511392	0.0363371	0.0323117	pgam1a/rpia/pgls/aldh3a2b/tpi1b
GO:0097164	ammonium ion metabolic process	6	0.000517086	0.0363371	0.0323117	apoa4b.3/chdh/odc1/apoa4b.1/hdac10/amd1
GO:0006739	NADP metabolic process	4	0.000638967	0.0429497	0.0381918	pgam1a/rpia/pgls/tpi1b
GO:0006633	fatty acid biosynthetic process	6	0.00086613	0.0557932	0.0496125	apoa4b.3/fads2/apoa4b.1/hsd17b12a/cbr4/hacd1
GO:0031102	neuron projection regeneration	5	0.00157771	0.0906352	0.0805948	apoa4b.3/hmgb1a/apoa4b.1/cnp/epha4a
GO:0009409	response to cold	3	0.00161922	0.0906352	0.0805948	per2/hmgb1a/bhlhe41
GO:0009991	response to extracellular stimulus	7	0.00164152	0.0906352	0.0805948	ins/nucb2a/cpt1b/gcga/fasn/nuak2/nupr1b
GO:0031667	response to nutrient levels	7	0.00164152	0.0906352	0.0805948	ins/nucb2a/cpt1b/gcga/fasn/nuak2/nupr1b
GO:0071391	cellular response to estrogen stimulus	4	0.00179028	0.0954406	0.0848679	cpn1/fkbp11/ssr1/nupr1b
GO:0051186	cofactor metabolic process	13	0.00195518	0.0990635	0.0880894	pgam1a/ndor1/naprt/mmadhc/fpgs/rpia/pgls/pfklb/narfl/tpi1b/chac1/acot17/hmox1a
GO:0009416	response to light stimulus	8	0.0019864	0.0990635	0.0880894	cry1aa/per2/tefa/per1b/tefb/per1a/dagla/cry2
GO:0006595	polyamine metabolic process	3	0.00207332	0.100167	0.0890707	odc1/hdac10/amd1
GO:0019362	pyridine nucleotide metabolic process	6	0.00225105	0.102357	0.0910178	pgam1a/naprt/rpia/pgls/pfklb/tpi1b
GO:0046496	nicotinamide nucleotide metabolic process	6	0.00225105	0.102357	0.0910178	pgam1a/naprt/rpia/pgls/pfklb/tpi1b
GO:0032371	regulation of sterol transport	3	0.0025991	0.111617	0.0992521	apoa4b.3/apoa4b.1/abca1a
GO:0032374	regulation of cholesterol transport	3	0.0025991	0.111617	0.0992521	apoa4b.3/apoa4b.1/abca1a
GO:0006641	triglyceride metabolic process	4	0.00271067	0.113262	0.100715	apoa4b.3/apoa4b.1/gk5/lpin1
GO:0072524	pyridine-containing compound metabolic process	6	0.00282254	0.114833	0.102112	pgam1a/naprt/rpia/pgls/pfklb/tpi1b
GO:0003309	type B pancreatic cell differentiation	4	0.00307803	0.120068	0.106767	ins/bhmt/gcga/lepr
GO:0009314	response to radiation	9	0.00310655	0.120068	0.106767	cry1aa/cdkn1a/per2/tefa/per1b/tefb/per1a/dagla/cry2
GO:0002067	glandular epithelial cell differentiation	4	0.00347795	0.123685	0.109984	ins/bhmt/gcga/lepr
GO:0009062	fatty acid catabolic process	4	0.00347795	0.123685	0.109984	ehhadh/auh/acox1/lpin1
GO:0035883	enteroendocrine cell differentiation	4	0.00347795	0.123685	0.109984	ins/bhmt/gcga/lepr
GO:0006970	response to osmotic stress	3	0.00387948	0.123685	0.109984	slc26a6/slc26a3.1/nupr1b
GO:0006638	neutral lipid metabolic process	4	0.00391177	0.123685	0.109984	apoa4b.3/apoa4b.1/gk5/lpin1
GO:0006639	acylglycerol metabolic process	4	0.00391177	0.123685	0.109984	apoa4b.3/apoa4b.1/gk5/lpin1
GO:0043627	response to estrogen	4	0.00391177	0.123685	0.109984	cpn1/fkbp11/ssr1/nupr1b
GO:0034404	nucleobase-containing small molecule biosynthetic process	7	0.0039376	0.123685	0.109984	pgam1a/cnp/impdh1b/upp1/pfklb/tpi1b/amd1
GO:0005996	monosaccharide metabolic process	6	0.00428277	0.123685	0.109984	ins/pgam1a/pfkfb4b/rpia/pcxa/tpi1b
GO:0009166	nucleotide catabolic process	5	0.00443523	0.123685	0.109984	pgam1a/cnp/upp1/pfklb/tpi1b
GO:0044270	cellular nitrogen compound catabolic process	11	0.00462586	0.123685	0.109984	ncbp2/bhmt/pgam1a/cnp/casc3/upp1/pfklb/gda/tpi1b/uraha/hmox1a
GO:0009743	response to carbohydrate	3	0.00464021	0.123685	0.109984	ins/gcga/lepr
GO:0009746	response to hexose	3	0.00464021	0.123685	0.109984	ins/gcga/lepr
GO:0009749	response to glucose	3	0.00464021	0.123685	0.109984	ins/gcga/lepr
GO:0032368	regulation of lipid transport	3	0.00464021	0.123685	0.109984	apoa4b.3/apoa4b.1/abca1a
GO:0034284	response to monosaccharide	3	0.00464021	0.123685	0.109984	ins/gcga/lepr
GO:0055081	anion homeostasis	3	0.00464021	0.123685	0.109984	slc26a6/enpp1/slc26a3.1
GO:1905952	regulation of lipid localization	3	0.00464021	0.123685	0.109984	apoa4b.3/apoa4b.1/abca1a
GO:0044275	cellular carbohydrate catabolic process	3	0.00548489	0.143723	0.127801	pgam1a/tpi1b/gk5
GO:1901292	nucleoside phosphate catabolic process	5	0.00561835	0.144766	0.128729	pgam1a/cnp/upp1/pfklb/tpi1b
GO:0071214	cellular response to abiotic stimulus	4	0.00601156	0.149901	0.133295	tefa/hvcn1/tefb/nupr1b
GO:0104004	cellular response to environmental stimulus	4	0.00601156	0.149901	0.133295	tefa/hvcn1/tefb/nupr1b
GO:0006733	oxidoreduction coenzyme metabolic process	6	0.00661691	0.162377	0.144389	pgam1a/naprt/rpia/pgls/pfklb/tpi1b
GO:0044242	cellular lipid catabolic process	6	0.00701321	0.169413	0.150646	ehhadh/apoa4b.3/apoa4b.1/auh/acox1/lpin1
GO:0006790	sulfur compound metabolic process	8	0.00714515	0.169945	0.151119	cbsb/bhmt/ndor1/narfl/chst7/chac1/acot17/amd1
GO:0006006	glucose metabolic process	4	0.00800279	0.185367	0.164833	ins/pgam1a/pcxa/tpi1b
GO:0045934	negative regulation of nucleobase-containing compound metabolic process	12	0.00803339	0.185367	0.164833	cry1aa/cipca/smyd2a/pbxip1b/cry1ab/hrh3/cited4a/bhlhe41/si:ch211-132b12.7/igfbp2b/cry2/cry1bb
GO:0003323	type B pancreatic cell development	3	0.00854514	0.191461	0.170251	bhmt/gcga/lepr
GO:0033344	cholesterol efflux	3	0.00854514	0.191461	0.170251	apoa4b.3/apoa4b.1/abca1a
GO:0019318	hexose metabolic process	5	0.00921272	0.200916	0.178659	ins/pgam1a/pfkfb4b/pcxa/tpi1b
GO:0072329	monocarboxylic acid catabolic process	4	0.00954517	0.200916	0.178659	ehhadh/auh/acox1/lpin1
GO:0002068	glandular epithelial cell development	3	0.00974688	0.200916	0.178659	bhmt/gcga/lepr
GO:0006094	gluconeogenesis	3	0.00974688	0.200916	0.178659	pgam1a/pcxa/tpi1b
GO:0006635	fatty acid beta-oxidation	3	0.00974688	0.200916	0.178659	ehhadh/auh/acox1
GO:0019319	hexose biosynthetic process	3	0.00974688	0.200916	0.178659	pgam1a/pcxa/tpi1b
GO:0055067	monovalent inorganic cation homeostasis	5	0.0104764	0.213111	0.189503	slc26a6/cxcr4b/slc9a3r1a/slc9a7/slc26a3.1
GO:0046364	monosaccharide biosynthetic process	3	0.011042	0.2217	0.197141	pgam1a/pcxa/tpi1b
GO:0055072	iron ion homeostasis	4	0.0112688	0.223353	0.19861	zgc:198419/hephl1a/aco1/hmox1a
GO:0046700	heterocycle catabolic process	10	0.0131398	0.243775	0.21677	ncbp2/pgam1a/cnp/casc3/upp1/pfklb/gda/tpi1b/uraha/hmox1a
GO:0006090	pyruvate metabolic process	4	0.0131808	0.243775	0.21677	pgam1a/pfklb/pcxa/tpi1b
GO:0006576	cellular biogenic amine metabolic process	3	0.013917	0.243775	0.21677	odc1/hdac10/amd1
GO:0019395	fatty acid oxidation	3	0.013917	0.243775	0.21677	ehhadh/auh/acox1
GO:0034440	lipid oxidation	3	0.013917	0.243775	0.21677	ehhadh/auh/acox1
GO:0048878	chemical homeostasis	14	0.0140723	0.243775	0.21677	apoa4b.3/slc26a6/zgc:198419/tac4/cxcr4b/apoa4b.1/slc9a3r1a/gcga/slc9a7/hephl1a/enpp1/slc26a3.1/aco1/hmox1a
GO:0019439	aromatic compound catabolic process	10	0.0143584	0.243775	0.21677	ncbp2/pgam1a/cnp/casc3/upp1/pfklb/gda/tpi1b/uraha/hmox1a
GO:0044282	small molecule catabolic process	7	0.0148737	0.243775	0.21677	ehhadh/auh/acox1/tpi1b/uraha/gk5/lpin1
GO:0044106	cellular amine metabolic process	3	0.0154988	0.243775	0.21677	odc1/hdac10/amd1
GO:0005975	carbohydrate metabolic process	13	0.0161513	0.243775	0.21677	ins/pgam1a/pfkfb4b/rpia/st6galnac5b/ldhbb/zgc:92137/pgls/pfklb/pcxa/tpi1b/chst7/gk5
GO:0044272	sulfur compound biosynthetic process	4	0.0164163	0.243775	0.21677	cbsb/bhmt/chst7/amd1
GO:0031331	positive regulation of cellular catabolic process	5	0.0167113	0.243775	0.21677	apoa4b.3/apoa4b.1/trib3/lonrf1/trib1
GO:0009309	amine biosynthetic process	2	0.016789	0.243775	0.21677	odc1/amd1
GO:0042401	cellular biogenic amine biosynthetic process	2	0.016789	0.243775	0.21677	odc1/amd1
GO:0044058	regulation of digestive system process	2	0.016789	0.243775	0.21677	apoa4b.3/apoa4b.1
GO:0045923	positive regulation of fatty acid metabolic process	2	0.016789	0.243775	0.21677	apoa4b.3/apoa4b.1
GO:0110020	regulation of actomyosin structure organization	2	0.016789	0.243775	0.21677	smyd2a/limk1a
GO:0097191	extrinsic apoptotic signaling pathway	3	0.0171776	0.243775	0.21677	casp8l1/bcl2l1/dedd1
GO:1901361	organic cyclic compound catabolic process	10	0.0175288	0.243775	0.21677	ncbp2/pgam1a/cnp/casc3/upp1/pfklb/gda/tpi1b/uraha/hmox1a
GO:0050790	regulation of catalytic activity	16	0.0183961	0.243775	0.21677	apoa4b.3/myo9aa/bcl2l1/apoa4b.1/timp2a/trib3/gadd45ba/myo9b/hrh3/plxnc1/iqgap2/si:ch211-171h4.3/plxnb1b/map2k6/trib1/rasal3
GO:0045892	negative regulation of transcription, DNA-templated	10	0.0185229	0.243775	0.21677	cry1aa/cipca/smyd2a/pbxip1b/cry1ab/cited4a/bhlhe41/si:ch211-132b12.7/cry2/cry1bb
GO:1902679	negative regulation of RNA biosynthetic process	10	0.0185229	0.243775	0.21677	cry1aa/cipca/smyd2a/pbxip1b/cry1ab/cited4a/bhlhe41/si:ch211-132b12.7/cry2/cry1bb
GO:1903507	negative regulation of nucleic acid-templated transcription	10	0.0185229	0.243775	0.21677	cry1aa/cipca/smyd2a/pbxip1b/cry1ab/cited4a/bhlhe41/si:ch211-132b12.7/cry2/cry1bb
GO:0055086	nucleobase-containing small molecule metabolic process	14	0.0186546	0.243775	0.21677	pgam1a/cnp/impdh1b/naprt/rpia/pgls/opa1/upp1/pfklb/gda/tpi1b/hrh3/uraha/amd1
GO:0006879	cellular iron ion homeostasis	3	0.018954	0.243775	0.21677	zgc:198419/hephl1a/aco1
GO:0031103	axon regeneration	3	0.018954	0.243775	0.21677	hmgb1a/cnp/epha4a
GO:0000097	sulfur amino acid biosynthetic process	2	0.0202459	0.243775	0.21677	cbsb/bhmt
GO:0009648	photoperiodism	2	0.0202459	0.243775	0.21677	per2/per1a
GO:0010872	regulation of cholesterol esterification	2	0.0202459	0.243775	0.21677	apoa4b.3/apoa4b.1
GO:0010873	positive regulation of cholesterol esterification	2	0.0202459	0.243775	0.21677	apoa4b.3/apoa4b.1
GO:0010896	regulation of triglyceride catabolic process	2	0.0202459	0.243775	0.21677	apoa4b.3/apoa4b.1
GO:0010898	positive regulation of triglyceride catabolic process	2	0.0202459	0.243775	0.21677	apoa4b.3/apoa4b.1
GO:0032922	circadian regulation of gene expression	2	0.0202459	0.243775	0.21677	nr1d1/ciarta
GO:0033700	phospholipid efflux	2	0.0202459	0.243775	0.21677	apoa4b.3/apoa4b.1
GO:0034367	protein-containing complex remodeling	2	0.0202459	0.243775	0.21677	apoa4b.3/apoa4b.1
GO:0034368	protein-lipid complex remodeling	2	0.0202459	0.243775	0.21677	apoa4b.3/apoa4b.1
GO:0034369	plasma lipoprotein particle remodeling	2	0.0202459	0.243775	0.21677	apoa4b.3/apoa4b.1
GO:0034370	triglyceride-rich lipoprotein particle remodeling	2	0.0202459	0.243775	0.21677	apoa4b.3/apoa4b.1
GO:0034372	very-low-density lipoprotein particle remodeling	2	0.0202459	0.243775	0.21677	apoa4b.3/apoa4b.1
GO:0034377	plasma lipoprotein particle assembly	2	0.0202459	0.243775	0.21677	apoa4b.3/apoa4b.1
GO:0034380	high-density lipoprotein particle assembly	2	0.0202459	0.243775	0.21677	apoa4b.3/apoa4b.1
GO:0042135	neurotransmitter catabolic process	2	0.0202459	0.243775	0.21677	comta/comtb
GO:0051597	response to methylmercury	2	0.0202459	0.243775	0.21677	mt2/gadd45ba
GO:0065005	protein-lipid complex assembly	2	0.0202459	0.243775	0.21677	apoa4b.3/apoa4b.1
GO:0071825	protein-lipid complex subunit organization	2	0.0202459	0.243775	0.21677	apoa4b.3/apoa4b.1
GO:0071827	plasma lipoprotein particle organization	2	0.0202459	0.243775	0.21677	apoa4b.3/apoa4b.1
GO:0097006	regulation of plasma lipoprotein particle levels	2	0.0202459	0.243775	0.21677	apoa4b.3/apoa4b.1
GO:0009896	positive regulation of catabolic process	5	0.0205929	0.243775	0.21677	apoa4b.3/apoa4b.1/trib3/lonrf1/trib1
GO:0009308	amine metabolic process	3	0.0208282	0.243775	0.21677	odc1/hdac10/amd1
GO:0046677	response to antibiotic	3	0.0208282	0.243775	0.21677	cry1aa/per2/per1a
GO:0048678	response to axon injury	3	0.0208282	0.243775	0.21677	hmgb1a/cnp/epha4a
GO:0051453	regulation of intracellular pH	4	0.0214448	0.243775	0.21677	slc26a6/cxcr4b/slc9a7/slc26a3.1
GO:0051336	regulation of hydrolase activity	10	0.0223299	0.243775	0.21677	apoa4b.3/myo9aa/bcl2l1/apoa4b.1/timp2a/myo9b/plxnc1/iqgap2/plxnb1b/rasal3
GO:1902904	negative regulation of supramolecular fiber organization	3	0.0228004	0.243775	0.21677	gsna/eps8a/gmfb
GO:0019359	nicotinamide nucleotide biosynthetic process	4	0.0228333	0.243775	0.21677	pgam1a/naprt/pfklb/tpi1b
GO:0019363	pyridine nucleotide biosynthetic process	4	0.0228333	0.243775	0.21677	pgam1a/naprt/pfklb/tpi1b
GO:0030641	regulation of cellular pH	4	0.0228333	0.243775	0.21677	slc26a6/cxcr4b/slc9a7/slc26a3.1
GO:0046434	organophosphate catabolic process	5	0.0238613	0.243775	0.21677	pgam1a/cnp/upp1/pfklb/tpi1b
GO:0006584	catecholamine metabolic process	2	0.0239712	0.243775	0.21677	comta/comtb
GO:0006817	phosphate ion transport	2	0.0239712	0.243775	0.21677	slc20a1b/slc20a2
GO:0007622	rhythmic behavior	2	0.0239712	0.243775	0.21677	per2/nr1d1
GO:0009712	catechol-containing compound metabolic process	2	0.0239712	0.243775	0.21677	comta/comtb
GO:0030299	intestinal cholesterol absorption	2	0.0239712	0.243775	0.21677	apoa4b.3/apoa4b.1
GO:0034433	steroid esterification	2	0.0239712	0.243775	0.21677	apoa4b.3/apoa4b.1
GO:0034434	sterol esterification	2	0.0239712	0.243775	0.21677	apoa4b.3/apoa4b.1
GO:0034435	cholesterol esterification	2	0.0239712	0.243775	0.21677	apoa4b.3/apoa4b.1
GO:0043691	reverse cholesterol transport	2	0.0239712	0.243775	0.21677	apoa4b.3/apoa4b.1
GO:0045940	positive regulation of steroid metabolic process	2	0.0239712	0.243775	0.21677	apoa4b.3/apoa4b.1
GO:0046470	phosphatidylcholine metabolic process	2	0.0239712	0.243775	0.21677	apoa4b.3/apoa4b.1
GO:0048512	circadian behavior	2	0.0239712	0.243775	0.21677	per2/nr1d1
GO:0050996	positive regulation of lipid catabolic process	2	0.0239712	0.243775	0.21677	apoa4b.3/apoa4b.1
GO:0055090	acylglycerol homeostasis	2	0.0239712	0.243775	0.21677	apoa4b.3/apoa4b.1
GO:0070328	triglyceride homeostasis	2	0.0239712	0.243775	0.21677	apoa4b.3/apoa4b.1
GO:0051093	negative regulation of developmental process	7	0.0240952	0.243775	0.21677	fdx1/per2/lfng/fbxw7/ahsg2/epha4a/igfbp2b
GO:0030004	cellular monovalent inorganic cation homeostasis	4	0.0242754	0.243775	0.21677	slc26a6/cxcr4b/slc9a7/slc26a3.1
GO:0006732	coenzyme metabolic process	8	0.0243929	0.243775	0.21677	pgam1a/naprt/fpgs/rpia/pgls/pfklb/tpi1b/acot17
GO:1901700	response to oxygen-containing compound	11	0.0244406	0.243775	0.21677	cry1aa/cxcr4b/per2/ins/nfe2l2a/ndor1/sesn1/socs1a/gcga/per1a/lepr
GO:0008202	steroid metabolic process	5	0.0250208	0.247962	0.220493	apoa4b.3/apoa4b.1/hsd17b12a/hsd3b7/soat1
GO:0007160	cell-matrix adhesion	4	0.0257713	0.249797	0.222125	itgb1b.2/itgb2/itgb1b.1/myo18aa
GO:0051253	negative regulation of RNA metabolic process	10	0.0260203	0.249797	0.222125	cry1aa/cipca/smyd2a/pbxip1b/cry1ab/cited4a/bhlhe41/si:ch211-132b12.7/cry2/cry1bb
GO:1901615	organic hydroxy compound metabolic process	7	0.0266804	0.249797	0.222125	apoa4b.3/apoa4b.1/tpi1b/comta/soat1/comtb/gk5
GO:0002066	columnar/cuboidal epithelial cell development	3	0.0270389	0.249797	0.222125	bhmt/gcga/lepr
GO:0002065	columnar/cuboidal epithelial cell differentiation	4	0.0273215	0.249797	0.222125	ins/bhmt/gcga/lepr
GO:0006885	regulation of pH	4	0.0273215	0.249797	0.222125	slc26a6/cxcr4b/slc9a7/slc26a3.1
GO:0010038	response to metal ion	4	0.0273215	0.249797	0.222125	mt2/gadd45ba/hvcn1/aco1
GO:0072525	pyridine-containing compound biosynthetic process	4	0.0273215	0.249797	0.222125	pgam1a/naprt/pfklb/tpi1b
GO:0008272	sulfate transport	2	0.0279527	0.249797	0.222125	slc26a6/slc26a3.1
GO:0009651	response to salt stress	2	0.0279527	0.249797	0.222125	slc26a6/slc26a3.1
GO:0019217	regulation of fatty acid metabolic process	2	0.0279527	0.249797	0.222125	apoa4b.3/apoa4b.1
GO:0019218	regulation of steroid metabolic process	2	0.0279527	0.249797	0.222125	apoa4b.3/apoa4b.1
GO:0044241	lipid digestion	2	0.0279527	0.249797	0.222125	apoa4b.3/apoa4b.1
GO:0046164	alcohol catabolic process	2	0.0279527	0.249797	0.222125	tpi1b/gk5
GO:0050892	intestinal absorption	2	0.0279527	0.249797	0.222125	apoa4b.3/apoa4b.1
GO:0098856	intestinal lipid absorption	2	0.0279527	0.249797	0.222125	apoa4b.3/apoa4b.1
GO:1901796	regulation of signal transduction by p53 class mediator	2	0.0279527	0.249797	0.222125	bcl6a/smyd2a
GO:0006694	steroid biosynthetic process	4	0.0289263	0.255544	0.227235	apoa4b.3/apoa4b.1/hsd17b12a/hsd3b7
GO:0062012	regulation of small molecule metabolic process	4	0.0289263	0.255544	0.227235	apoa4b.3/apoa4b.1/pgam1a/hrh3
GO:0030301	cholesterol transport	3	0.0293047	0.257415	0.228899	apoa4b.3/apoa4b.1/abca1a
GO:0030258	lipid modification	6	0.0294874	0.257557	0.229025	ehhadh/apoa4b.3/apoa4b.1/auh/acox1/plpp3
GO:0098771	inorganic ion homeostasis	11	0.0313893	0.262289	0.233233	slc26a6/zgc:198419/tac4/cxcr4b/slc9a3r1a/slc9a7/hephl1a/enpp1/slc26a3.1/aco1/hmox1a
GO:0015918	sterol transport	3	0.0316678	0.262289	0.233233	apoa4b.3/apoa4b.1/abca1a
GO:0032436	positive regulation of proteasomal ubiquitin-dependent protein catabolic process	3	0.0316678	0.262289	0.233233	trib3/lonrf1/trib1
GO:0051494	negative regulation of cytoskeleton organization	3	0.0316678	0.262289	0.233233	gsna/eps8a/gmfb
GO:1901800	positive regulation of proteasomal protein catabolic process	3	0.0316678	0.262289	0.233233	trib3/lonrf1/trib1
GO:0019433	triglyceride catabolic process	2	0.0321783	0.262289	0.233233	apoa4b.3/apoa4b.1
GO:0042632	cholesterol homeostasis	2	0.0321783	0.262289	0.233233	apoa4b.3/apoa4b.1
GO:0055092	sterol homeostasis	2	0.0321783	0.262289	0.233233	apoa4b.3/apoa4b.1
GO:0060193	positive regulation of lipase activity	2	0.0321783	0.262289	0.233233	apoa4b.3/apoa4b.1
GO:0070167	regulation of biomineral tissue development	2	0.0321783	0.262289	0.233233	enpp1/ahsg2
GO:0090207	regulation of triglyceride metabolic process	2	0.0321783	0.262289	0.233233	apoa4b.3/apoa4b.1
GO:0090208	positive regulation of triglyceride metabolic process	2	0.0321783	0.262289	0.233233	apoa4b.3/apoa4b.1
GO:0042176	regulation of protein catabolic process	4	0.0323008	0.262289	0.233233	timp2a/trib3/lonrf1/trib1
GO:0051241	negative regulation of multicellular organismal process	7	0.0324044	0.262289	0.233233	adrb2b/fdx1/per2/lfng/fbxw7/ahsg2/epha4a
GO:0050801	ion homeostasis	11	0.0335066	0.269798	0.23991	slc26a6/zgc:198419/tac4/cxcr4b/slc9a3r1a/slc9a7/hephl1a/enpp1/slc26a3.1/aco1/hmox1a
GO:0030203	glycosaminoglycan metabolic process	3	0.0341276	0.270571	0.240597	gnsb/chst7/pglyrp2
GO:1903052	positive regulation of proteolysis involved in cellular protein catabolic process	3	0.0341276	0.270571	0.240597	trib3/lonrf1/trib1
GO:2000060	positive regulation of ubiquitin-dependent protein catabolic process	3	0.0341276	0.270571	0.240597	trib3/lonrf1/trib1
GO:0031099	regeneration	8	0.0354963	0.273975	0.243625	apoa4b.3/cxcr4b/lfng/hmgb1a/apoa4b.1/cnp/epha4a/hbegfa
GO:0009410	response to xenobiotic stimulus	4	0.0358962	0.273975	0.243625	cyp1a/ahr1a/nfe2l2a/hmox1a
GO:0031589	cell-substrate adhesion	4	0.0358962	0.273975	0.243625	itgb1b.2/itgb2/itgb1b.1/myo18aa
GO:0030162	regulation of proteolysis	6	0.0365595	0.273975	0.243625	bcl2l1/timp2a/trib3/lonrf1/chac1/trib1
GO:0045926	negative regulation of growth	2	0.0366364	0.273975	0.243625	epha4a/igfbp2b
GO:0046686	response to cadmium ion	2	0.0366364	0.273975	0.243625	mt2/gadd45ba
GO:0050994	regulation of lipid catabolic process	2	0.0366364	0.273975	0.243625	apoa4b.3/apoa4b.1
GO:0060191	regulation of lipase activity	2	0.0366364	0.273975	0.243625	apoa4b.3/apoa4b.1
GO:2001243	negative regulation of intrinsic apoptotic signaling pathway	2	0.0366364	0.273975	0.243625	bcl2l1/bcl6a
GO:0006096	glycolytic process	3	0.0366836	0.273975	0.243625	pgam1a/pfklb/tpi1b
GO:0006757	ATP generation from ADP	3	0.0366836	0.273975	0.243625	pgam1a/pfklb/tpi1b
GO:1903364	positive regulation of cellular protein catabolic process	3	0.0366836	0.273975	0.243625	trib3/lonrf1/trib1
GO:0009119	ribonucleoside metabolic process	4	0.0377772	0.280786	0.249681	impdh1b/opa1/upp1/amd1
GO:0007626	locomotory behavior	5	0.0386175	0.285658	0.254014	myo9aa/per2/bag3/nr1d1/dagla
GO:0042866	pyruvate biosynthetic process	3	0.0393351	0.288233	0.256303	pgam1a/pfklb/tpi1b
GO:0009636	response to toxic substance	4	0.0397138	0.288233	0.256303	cry1aa/abcb4/per2/per1a
GO:0044255	cellular lipid metabolic process	15	0.0398034	0.288233	0.256303	ehhadh/apoa4b.3/fads2/apoa4b.1/chpt1/hsd17b12a/cbr4/auh/acox1/cyp2k16/hacd1/plpp3/acot17/gk5/lpin1
GO:0042493	response to drug	7	0.0400558	0.288233	0.256303	cry1aa/per2/ndor1/cpt1b/fasn/per1a/slc25a1b
GO:0010043	response to zinc ion	2	0.041316	0.288233	0.256303	mt2/hvcn1
GO:0033273	response to vitamin	2	0.041316	0.288233	0.256303	cpt1b/fasn
GO:0042398	cellular modified amino acid biosynthetic process	2	0.041316	0.288233	0.256303	chdh/fpgs
GO:0045746	negative regulation of Notch signaling pathway	2	0.041316	0.288233	0.256303	chac1/fbxw7
GO:0046889	positive regulation of lipid biosynthetic process	2	0.041316	0.288233	0.256303	apoa4b.3/apoa4b.1
GO:0071526	semaphorin-plexin signaling pathway	2	0.041316	0.288233	0.256303	plxnc1/plxnb1b
GO:1901616	organic hydroxy compound catabolic process	2	0.041316	0.288233	0.256303	tpi1b/gk5
GO:0016052	carbohydrate catabolic process	4	0.041706	0.288233	0.256303	pgam1a/pfklb/tpi1b/gk5
GO:0031018	endocrine pancreas development	4	0.041706	0.288233	0.256303	ins/bhmt/gcga/lepr
GO:0008203	cholesterol metabolic process	3	0.0420812	0.288233	0.256303	apoa4b.3/apoa4b.1/soat1
GO:0072331	signal transduction by p53 class mediator	3	0.0420812	0.288233	0.256303	cdkn1a/bcl6a/smyd2a
GO:1902652	secondary alcohol metabolic process	3	0.0420812	0.288233	0.256303	apoa4b.3/apoa4b.1/soat1
GO:0009117	nucleotide metabolic process	11	0.0421349	0.288233	0.256303	pgam1a/cnp/impdh1b/naprt/rpia/pgls/opa1/upp1/pfklb/tpi1b/hrh3
GO:0055076	transition metal ion homeostasis	4	0.0437538	0.297988	0.264978	zgc:198419/hephl1a/aco1/hmox1a
GO:0006753	nucleoside phosphate metabolic process	11	0.0447323	0.303266	0.269671	pgam1a/cnp/impdh1b/naprt/rpia/pgls/opa1/upp1/pfklb/tpi1b/hrh3
GO:0045732	positive regulation of protein catabolic process	3	0.044921	0.303266	0.269671	trib3/lonrf1/trib1
GO:0016042	lipid catabolic process	6	0.0460822	0.305276	0.271458	ehhadh/apoa4b.3/apoa4b.1/auh/acox1/lpin1
GO:0046461	neutral lipid catabolic process	2	0.0462061	0.305276	0.271458	apoa4b.3/apoa4b.1
GO:0046464	acylglycerol catabolic process	2	0.0462061	0.305276	0.271458	apoa4b.3/apoa4b.1
GO:0050772	positive regulation of axonogenesis	2	0.0462061	0.305276	0.271458	plxnc1/plxnb1b
GO:0071542	dopaminergic neuron differentiation	2	0.0462061	0.305276	0.271458	anos1a/per1b
GO:0040008	regulation of growth	6	0.047557	0.310848	0.276413	cxcr4b/tgfbr2b/igfbp7/cyr61l2/epha4a/igfbp2b
GO:0045861	negative regulation of proteolysis	3	0.0478537	0.310848	0.276413	bcl2l1/timp2a/chac1
GO:0046031	ADP metabolic process	3	0.0478537	0.310848	0.276413	pgam1a/pfklb/tpi1b
GO:0051961	negative regulation of nervous system development	3	0.0478537	0.310848	0.276413	lfng/fbxw7/epha4a
GO:0031329	regulation of cellular catabolic process	7	0.0488002	0.31567	0.280701	apoa4b.3/apoa4b.1/pgam1a/timp2a/trib3/lonrf1/trib1
GO:0060537	muscle tissue development	8	0.0495989	0.317216	0.282075	cdkn1a/myh7/bag3/opa1/mybpc1/smyd2a/myo18aa/foxo1a
GO:0001558	regulation of cell growth	5	0.0503745	0.317216	0.282075	cxcr4b/igfbp7/cyr61l2/epha4a/igfbp2b
GO:0006066	alcohol metabolic process	5	0.0503745	0.317216	0.282075	apoa4b.3/apoa4b.1/tpi1b/soat1/gk5
GO:0009135	purine nucleoside diphosphate metabolic process	3	0.050878	0.317216	0.282075	pgam1a/pfklb/tpi1b
GO:0009179	purine ribonucleoside diphosphate metabolic process	3	0.050878	0.317216	0.282075	pgam1a/pfklb/tpi1b
GO:0009185	ribonucleoside diphosphate metabolic process	3	0.050878	0.317216	0.282075	pgam1a/pfklb/tpi1b
GO:0032434	regulation of proteasomal ubiquitin-dependent protein catabolic process	3	0.050878	0.317216	0.282075	trib3/lonrf1/trib1
GO:0042133	neurotransmitter metabolic process	3	0.050878	0.317216	0.282075	chdh/comta/comtb
GO:0043173	nucleotide salvage	2	0.0512963	0.317216	0.282075	naprt/upp1
GO:0046503	glycerolipid catabolic process	2	0.0512963	0.317216	0.282075	apoa4b.3/apoa4b.1
GO:0071482	cellular response to light stimulus	2	0.0512963	0.317216	0.282075	tefa/tefb
GO:0019693	ribose phosphate metabolic process	9	0.0537265	0.329933	0.293384	pgam1a/impdh1b/rpia/pgls/opa1/upp1/pfklb/tpi1b/hrh3
GO:0042594	response to starvation	3	0.053993	0.329933	0.293384	gcga/nuak2/nupr1b
GO:0046128	purine ribonucleoside metabolic process	3	0.053993	0.329933	0.293384	impdh1b/opa1/amd1
GO:0055080	cation homeostasis	10	0.0543261	0.330662	0.294032	slc26a6/zgc:198419/tac4/cxcr4b/slc9a3r1a/slc9a7/hephl1a/slc26a3.1/aco1/hmox1a
GO:0030900	forebrain development	6	0.0553666	0.332574	0.295732	cxcr4b/anos1a/hmgb1a/mycbp2/epha4a/cetn4
GO:0000184	nuclear-transcribed mRNA catabolic process, nonsense-mediated decay	2	0.0565763	0.332574	0.295732	ncbp2/casc3
GO:0006695	cholesterol biosynthetic process	2	0.0565763	0.332574	0.295732	apoa4b.3/apoa4b.1
GO:0010770	positive regulation of cell morphogenesis involved in differentiation	2	0.0565763	0.332574	0.295732	plxnc1/plxnb1b
GO:0016226	iron-sulfur cluster assembly	2	0.0565763	0.332574	0.295732	ndor1/narfl
GO:0031163	metallo-sulfur cluster assembly	2	0.0565763	0.332574	0.295732	ndor1/narfl
GO:0042219	cellular modified amino acid catabolic process	2	0.0565763	0.332574	0.295732	chac1/ggact.1
GO:0048920	posterior lateral line neuromast primordium migration	2	0.0565763	0.332574	0.295732	cxcr4b/anos1a
GO:1902653	secondary alcohol biosynthetic process	2	0.0565763	0.332574	0.295732	apoa4b.3/apoa4b.1
GO:0042455	ribonucleoside biosynthetic process	3	0.0571973	0.333687	0.296721	impdh1b/upp1/amd1
GO:2000058	regulation of ubiquitin-dependent protein catabolic process	3	0.0571973	0.333687	0.296721	trib3/lonrf1/trib1
GO:0009894	regulation of catabolic process	7	0.0586726	0.341007	0.303231	apoa4b.3/apoa4b.1/pgam1a/timp2a/trib3/lonrf1/trib1
GO:0050770	regulation of axonogenesis	4	0.0596386	0.344403	0.306251	cxcr4b/plxnc1/plxnb1b/epha4a
GO:0008610	lipid biosynthetic process	9	0.0597339	0.344403	0.306251	apoa4b.3/fads2/apoa4b.1/chpt1/hsd17b12a/hsd3b7/cbr4/hacd1/lpin1
GO:0002040	sprouting angiogenesis	5	0.0599252	0.344403	0.306251	mt2/igfbp7/flt1/abca1a/narfl
GO:0009163	nucleoside biosynthetic process	3	0.0604897	0.344994	0.306776	impdh1b/upp1/amd1
GO:0042278	purine nucleoside metabolic process	3	0.0604897	0.344994	0.306776	impdh1b/opa1/amd1
GO:0031327	negative regulation of cellular biosynthetic process	13	0.0617297	0.344994	0.306776	cry1aa/cipca/itm2bb/smyd2a/pbxip1b/cry1ab/hrh3/cited4a/bhlhe41/si:ch211-132b12.7/igfbp2b/cry2/cry1bb
GO:0018958	phenol-containing compound metabolic process	2	0.0620364	0.344994	0.306776	comta/comtb
GO:0042558	pteridine-containing compound metabolic process	2	0.0620364	0.344994	0.306776	mycbp2/fpgs
GO:0045834	positive regulation of lipid metabolic process	2	0.0620364	0.344994	0.306776	apoa4b.3/apoa4b.1
GO:0046039	GTP metabolic process	2	0.0620364	0.344994	0.306776	impdh1b/opa1
GO:0048883	neuromast primordium migration	2	0.0620364	0.344994	0.306776	cxcr4b/anos1a
GO:0072348	sulfur compound transport	2	0.0620364	0.344994	0.306776	slc26a6/slc26a3.1
GO:0009890	negative regulation of biosynthetic process	13	0.0637048	0.348909	0.310258	cry1aa/cipca/itm2bb/smyd2a/pbxip1b/cry1ab/hrh3/cited4a/bhlhe41/si:ch211-132b12.7/igfbp2b/cry2/cry1bb
GO:0006165	nucleoside diphosphate phosphorylation	3	0.0638689	0.348909	0.310258	pgam1a/pfklb/tpi1b
GO:0046939	nucleotide phosphorylation	3	0.0638689	0.348909	0.310258	pgam1a/pfklb/tpi1b
GO:0061136	regulation of proteasomal protein catabolic process	3	0.0638689	0.348909	0.310258	trib3/lonrf1/trib1
GO:0071466	cellular response to xenobiotic stimulus	3	0.0638689	0.348909	0.310258	cyp1a/nfe2l2a/hmox1a
GO:0009156	ribonucleoside monophosphate biosynthetic process	5	0.066117	0.353423	0.314272	pgam1a/impdh1b/upp1/pfklb/tpi1b
GO:0008593	regulation of Notch signaling pathway	3	0.0673335	0.353423	0.314272	lfng/chac1/fbxw7
GO:0043405	regulation of MAP kinase activity	3	0.0673335	0.353423	0.314272	trib3/gadd45ba/trib1
GO:1901659	glycosyl compound biosynthetic process	3	0.0673335	0.353423	0.314272	impdh1b/upp1/amd1
GO:0000096	sulfur amino acid metabolic process	2	0.0676671	0.353423	0.314272	cbsb/bhmt
GO:0006144	purine nucleobase metabolic process	2	0.0676671	0.353423	0.314272	gda/uraha
GO:0007050	cell cycle arrest	2	0.0676671	0.353423	0.314272	cdkn1a/cdc123
GO:0010565	regulation of cellular ketone metabolic process	2	0.0676671	0.353423	0.314272	apoa4b.3/apoa4b.1
GO:0050795	regulation of behavior	2	0.0676671	0.353423	0.314272	ins/nr1d1
GO:0051187	cofactor catabolic process	2	0.0676671	0.353423	0.314272	chac1/hmox1a
GO:0051693	actin filament capping	2	0.0676671	0.353423	0.314272	gsna/eps8a
GO:0062013	positive regulation of small molecule metabolic process	2	0.0676671	0.353423	0.314272	apoa4b.3/apoa4b.1
GO:2001234	negative regulation of apoptotic signaling pathway	2	0.0676671	0.353423	0.314272	bcl2l1/bcl6a
GO:0051056	regulation of small GTPase mediated signal transduction	7	0.0696943	0.362786	0.322597	arhgef5/si:dkey-166d12.2/si:ch73-15b2.5/si:dkey-91m11.5/arhgef10lb/mmd/rasal3
GO:1903050	regulation of proteolysis involved in cellular protein catabolic process	3	0.0708821	0.36773	0.326994	trib3/lonrf1/trib1
GO:0043087	regulation of GTPase activity	6	0.0712666	0.367759	0.327019	myo9aa/myo9b/plxnc1/iqgap2/plxnb1b/rasal3
GO:0007610	behavior	7	0.0713632	0.367759	0.327019	myo9aa/per2/ins/bag3/nr1d1/pcxa/dagla
GO:0009124	nucleoside monophosphate biosynthetic process	5	0.0726524	0.369928	0.328948	pgam1a/impdh1b/upp1/pfklb/tpi1b
GO:0008038	neuron recognition	2	0.0734591	0.369928	0.328948	anos1a/mycbp2
GO:0010951	negative regulation of endopeptidase activity	2	0.0734591	0.369928	0.328948	bcl2l1/timp2a
GO:0030835	negative regulation of actin filament depolymerization	2	0.0734591	0.369928	0.328948	gsna/eps8a
GO:0045665	negative regulation of neuron differentiation	2	0.0734591	0.369928	0.328948	lfng/epha4a
GO:1901068	guanosine-containing compound metabolic process	2	0.0734591	0.369928	0.328948	impdh1b/opa1
GO:2001242	regulation of intrinsic apoptotic signaling pathway	2	0.0734591	0.369928	0.328948	bcl2l1/bcl6a
GO:0007229	integrin-mediated signaling pathway	3	0.0745131	0.372807	0.331508	itgb1b.2/itgb2/itgb1b.1
GO:0046916	cellular transition metal ion homeostasis	3	0.0745131	0.372807	0.331508	zgc:198419/hephl1a/aco1
GO:0035270	endocrine system development	5	0.0749067	0.373567	0.332184	bcl2l1/ins/bhmt/gcga/lepr
GO:0006413	translational initiation	4	0.0781807	0.386377	0.343575	eif5/eif2s2/brf1a/eif4e2
GO:0006022	aminoglycan metabolic process	3	0.0782251	0.386377	0.343575	gnsb/chst7/pglyrp2
GO:1903362	regulation of cellular protein catabolic process	3	0.0782251	0.386377	0.343575	trib3/lonrf1/trib1
GO:0030834	regulation of actin filament depolymerization	2	0.0794036	0.389085	0.345983	gsna/eps8a
GO:1901880	negative regulation of protein depolymerization	2	0.0794036	0.389085	0.345983	gsna/eps8a
GO:1902903	regulation of supramolecular fiber organization	5	0.0795283	0.389085	0.345983	gsna/eps8a/gmfb/smyd2a/limk1a
GO:0009116	nucleoside metabolic process	4	0.0810397	0.39275	0.349242	impdh1b/opa1/upp1/amd1
GO:0009145	purine nucleoside triphosphate biosynthetic process	4	0.0810397	0.39275	0.349242	pgam1a/impdh1b/pfklb/tpi1b
GO:0009206	purine ribonucleoside triphosphate biosynthetic process	4	0.0810397	0.39275	0.349242	pgam1a/impdh1b/pfklb/tpi1b
GO:0072521	purine-containing compound metabolic process	9	0.0817703	0.394423	0.35073	pgam1a/impdh1b/opa1/pfklb/gda/tpi1b/hrh3/uraha/amd1
GO:0007519	skeletal muscle tissue development	5	0.0818952	0.394423	0.35073	cdkn1a/bag3/mybpc1/smyd2a/myo18aa
GO:0006140	regulation of nucleotide metabolic process	2	0.0854919	0.407025	0.361935	pgam1a/hrh3
GO:0060359	response to ammonium ion	2	0.0854919	0.407025	0.361935	cpt1b/fasn
GO:0071478	cellular response to radiation	2	0.0854919	0.407025	0.361935	tefa/tefb
GO:0034655	nucleobase-containing compound catabolic process	7	0.0855647	0.407025	0.361935	ncbp2/pgam1a/cnp/casc3/upp1/pfklb/tpi1b
GO:0010769	regulation of cell morphogenesis involved in differentiation	4	0.0869104	0.410898	0.365379	cxcr4b/plxnc1/plxnb1b/epha4a
GO:0015698	inorganic anion transport	4	0.0869104	0.410898	0.365379	slc26a6/slc20a1b/slc20a2/slc26a3.1
GO:0071407	cellular response to organic cyclic compound	5	0.0892179	0.413463	0.36766	cyp1a/ahr1a/pparda/nr1d1/rorab
GO:0016049	cell growth	6	0.089531	0.413463	0.36766	cxcr4b/igfbp7/cyr61l2/plxnb1b/epha4a/igfbp2b
GO:0055082	cellular chemical homeostasis	9	0.0895457	0.413463	0.36766	slc26a6/zgc:198419/tac4/cxcr4b/gcga/slc9a7/hephl1a/slc26a3.1/aco1
GO:0009132	nucleoside diphosphate metabolic process	3	0.0898311	0.413463	0.36766	pgam1a/pfklb/tpi1b
GO:0015850	organic hydroxy compound transport	3	0.0898311	0.413463	0.36766	apoa4b.3/apoa4b.1/abca1a
GO:0071599	otic vesicle development	3	0.0898311	0.413463	0.36766	slc9a3r1a/cul4a/sharpin
GO:0002064	epithelial cell development	4	0.0899213	0.413463	0.36766	bhmt/gcga/iqgap2/lepr
GO:0006826	iron ion transport	2	0.0917158	0.413463	0.36766	zgc:198419/hephl1a
GO:0030837	negative regulation of actin filament polymerization	2	0.0917158	0.413463	0.36766	gsna/eps8a
GO:0032272	negative regulation of protein polymerization	2	0.0917158	0.413463	0.36766	gsna/eps8a
GO:0034599	cellular response to oxidative stress	2	0.0917158	0.413463	0.36766	nfe2l2a/txnl1
GO:0042451	purine nucleoside biosynthetic process	2	0.0917158	0.413463	0.36766	impdh1b/amd1
GO:0043242	negative regulation of protein complex disassembly	2	0.0917158	0.413463	0.36766	gsna/eps8a
GO:0046129	purine ribonucleoside biosynthetic process	2	0.0917158	0.413463	0.36766	impdh1b/amd1
GO:0072523	purine-containing compound catabolic process	2	0.0917158	0.413463	0.36766	gda/uraha
GO:0001505	regulation of neurotransmitter levels	5	0.091732	0.413463	0.36766	doc2d/chdh/comta/hrh3/comtb
GO:0016125	sterol metabolic process	3	0.093851	0.421784	0.375059	apoa4b.3/apoa4b.1/soat1
GO:0031032	actomyosin structure organization	5	0.0942825	0.422163	0.375396	myh7/mybpc1/smyd2a/myo18aa/limk1a
GO:0010558	negative regulation of macromolecule biosynthetic process	12	0.0947545	0.422163	0.375396	cry1aa/cipca/itm2bb/smyd2a/pbxip1b/cry1ab/cited4a/bhlhe41/si:ch211-132b12.7/igfbp2b/cry2/cry1bb
GO:2000113	negative regulation of cellular macromolecule biosynthetic process	12	0.0947545	0.422163	0.375396	cry1aa/cipca/itm2bb/smyd2a/pbxip1b/cry1ab/cited4a/bhlhe41/si:ch211-132b12.7/igfbp2b/cry2/cry1bb
GO:0019725	cellular homeostasis	11	0.0958572	0.425849	0.378674	slc26a6/zgc:198419/tac4/nhlrc2/cxcr4b/txnl1/gcga/slc9a7/hephl1a/slc26a3.1/aco1
GO:0009108	coenzyme biosynthetic process	5	0.0968689	0.42911	0.381574	pgam1a/naprt/fpgs/pfklb/tpi1b
GO:0045862	positive regulation of proteolysis	3	0.0979437	0.430716	0.383002	trib3/lonrf1/trib1
GO:0010466	negative regulation of peptidase activity	2	0.0980673	0.430716	0.383002	bcl2l1/timp2a
GO:0055088	lipid homeostasis	2	0.0980673	0.430716	0.383002	apoa4b.3/apoa4b.1
GO:0014706	striated muscle tissue development	7	0.0992209	0.434548	0.38641	cdkn1a/myh7/bag3/opa1/mybpc1/smyd2a/myo18aa
GO:0007584	response to nutrient	2	0.104538	0.452707	0.402557	cpt1b/fasn
GO:0043171	peptide catabolic process	2	0.104538	0.452707	0.402557	erap2/chac1
GO:0046890	regulation of lipid biosynthetic process	2	0.104538	0.452707	0.402557	apoa4b.3/apoa4b.1
GO:1901879	regulation of protein depolymerization	2	0.104538	0.452707	0.402557	gsna/eps8a
GO:0009201	ribonucleoside triphosphate biosynthetic process	4	0.105707	0.453952	0.403664	pgam1a/impdh1b/pfklb/tpi1b
GO:0016054	organic acid catabolic process	4	0.105707	0.453952	0.403664	ehhadh/auh/acox1/lpin1
GO:0046395	carboxylic acid catabolic process	4	0.105707	0.453952	0.403664	ehhadh/auh/acox1/lpin1
GO:0030003	cellular cation homeostasis	8	0.107597	0.459983	0.409027	slc26a6/zgc:198419/tac4/cxcr4b/slc9a7/hephl1a/slc26a3.1/aco1
GO:0046578	regulation of Ras protein signal transduction	6	0.107706	0.459983	0.409027	arhgef5/si:ch73-15b2.5/si:dkey-91m11.5/arhgef10lb/mmd/rasal3
GO:0030239	myofibril assembly	4	0.109006	0.462976	0.411688	myh7/mybpc1/smyd2a/myo18aa
GO:1901657	glycosyl compound metabolic process	4	0.109006	0.462976	0.411688	impdh1b/opa1/upp1/amd1
GO:0031333	negative regulation of protein complex assembly	2	0.111122	0.47067	0.41853	gsna/eps8a
GO:0060538	skeletal muscle organ development	5	0.113127	0.477855	0.424919	cdkn1a/bag3/mybpc1/smyd2a/myo18aa
GO:0009165	nucleotide biosynthetic process	7	0.114002	0.480236	0.427036	pgam1a/impdh1b/naprt/upp1/pfklb/tpi1b/hrh3
GO:0008283	cell proliferation	12	0.114931	0.482836	0.429348	fgfr4/ppdpfa/bcl6a/smyd2a/csk/ptmab/foxo1a/ndrg1a/cyp27b1/cetn4/hbegfa/igfbp2b
GO:0032956	regulation of actin cytoskeleton organization	5	0.115958	0.485828	0.432009	gsna/eps8a/gmfb/smyd2a/limk1a
GO:0006612	protein targeting to membrane	2	0.11781	0.490929	0.436545	slc9a3r1a/ssr1
GO:0098661	inorganic anion transmembrane transport	2	0.11781	0.490929	0.436545	slc26a6/slc20a1b
GO:1901293	nucleoside phosphate biosynthetic process	7	0.118427	0.492172	0.43765	pgam1a/impdh1b/naprt/upp1/pfklb/tpi1b/hrh3
GO:0006873	cellular ion homeostasis	8	0.121569	0.501646	0.446075	slc26a6/zgc:198419/tac4/cxcr4b/slc9a7/hephl1a/slc26a3.1/aco1
GO:0044057	regulation of system process	5	0.121718	0.501646	0.446075	apoa4b.3/adrb2b/apoa4b.1/flt1/fbxw7
GO:0009260	ribonucleotide biosynthetic process	6	0.122491	0.501646	0.446075	pgam1a/impdh1b/upp1/pfklb/tpi1b/hrh3
GO:0046390	ribose phosphate biosynthetic process	6	0.122491	0.501646	0.446075	pgam1a/impdh1b/upp1/pfklb/tpi1b/hrh3
GO:0009142	nucleoside triphosphate biosynthetic process	4	0.122654	0.501646	0.446075	pgam1a/impdh1b/pfklb/tpi1b
GO:0010927	cellular component assembly involved in morphogenesis	4	0.122654	0.501646	0.446075	myh7/mybpc1/smyd2a/myo18aa
GO:0006575	cellular modified amino acid metabolic process	3	0.123932	0.505537	0.449535	chdh/fpgs/chac1
GO:0055013	cardiac muscle cell development	2	0.124597	0.506912	0.450757	myh7/opa1
GO:0072522	purine-containing compound biosynthetic process	6	0.125049	0.507415	0.451204	pgam1a/impdh1b/pfklb/tpi1b/hrh3/amd1
GO:0009127	purine nucleoside monophosphate biosynthetic process	4	0.126175	0.509311	0.45289	pgam1a/impdh1b/pfklb/tpi1b
GO:0009168	purine ribonucleoside monophosphate biosynthetic process	4	0.126175	0.509311	0.45289	pgam1a/impdh1b/pfklb/tpi1b
GO:0043624	cellular protein complex disassembly	3	0.128485	0.517288	0.459984	gsna/napab/eps8a
GO:0032970	regulation of actin filament-based process	5	0.130605	0.523864	0.465831	gsna/eps8a/gmfb/smyd2a/limk1a
GO:0022600	digestive system process	2	0.131474	0.523864	0.465831	apoa4b.3/apoa4b.1
GO:0030042	actin filament depolymerization	2	0.131474	0.523864	0.465831	gsna/eps8a
GO:0033559	unsaturated fatty acid metabolic process	2	0.131474	0.523864	0.465831	fads2/cyp2k16
GO:0016126	sterol biosynthetic process	2	0.138437	0.544588	0.48426	apoa4b.3/apoa4b.1
GO:0031214	biomineral tissue development	2	0.138437	0.544588	0.48426	enpp1/ahsg2
GO:0032102	negative regulation of response to external stimulus	2	0.138437	0.544588	0.48426	cxcr4b/epha4a
GO:0033013	tetrapyrrole metabolic process	2	0.138437	0.544588	0.48426	mmadhc/hmox1a
GO:0055006	cardiac cell development	2	0.138437	0.544588	0.48426	myh7/opa1
GO:0051129	negative regulation of cellular component organization	4	0.140675	0.551987	0.490839	gsna/eps8a/gmfb/epha4a
GO:0098656	anion transmembrane transport	3	0.142491	0.5577	0.495919	slc26a6/slc20a1b/slc25a1b
GO:1901137	carbohydrate derivative biosynthetic process	13	0.144474	0.56227	0.499983	lfng/pgam1a/b3gnt5a/impdh1b/itm2bb/st6galnac5b/upp1/pfklb/tpi1b/hrh3/chst7/gk5/amd1
GO:0007009	plasma membrane organization	2	0.145477	0.56227	0.499983	mtss1la/ndrg1a
GO:0010976	positive regulation of neuron projection development	2	0.145477	0.56227	0.499983	plxnc1/plxnb1b
GO:0043094	cellular metabolic compound salvage	2	0.145477	0.56227	0.499983	naprt/upp1
GO:2001233	regulation of apoptotic signaling pathway	2	0.145477	0.56227	0.499983	bcl2l1/bcl6a
GO:0008380	RNA splicing	7	0.146787	0.565917	0.503226	rbm10/ncbp2/casc3/snrpd3/snrpa1/thrap3a/esrp2
GO:0007517	muscle organ development	6	0.149204	0.573804	0.510239	cdkn1a/arrb2b/bag3/mybpc1/smyd2a/myo18aa
GO:0016051	carbohydrate biosynthetic process	3	0.152098	0.579619	0.51541	pgam1a/pcxa/tpi1b
GO:0001817	regulation of cytokine production	2	0.152591	0.579619	0.51541	mt2/csk
GO:0009112	nucleobase metabolic process	2	0.152591	0.579619	0.51541	gda/uraha
GO:0015914	phospholipid transport	2	0.152591	0.579619	0.51541	apoa4b.3/apoa4b.1
GO:0071600	otic vesicle morphogenesis	2	0.152591	0.579619	0.51541	cul4a/sharpin
GO:0009205	purine ribonucleoside triphosphate metabolic process	5	0.155664	0.588922	0.523683	pgam1a/impdh1b/opa1/pfklb/tpi1b
GO:0110053	regulation of actin filament organization	4	0.155802	0.588922	0.523683	gsna/eps8a/gmfb/limk1a
GO:0031175	neuron projection development	13	0.156261	0.589217	0.523945	apoa4b.3/myo9aa/cxcr4b/anos1a/hmgb1a/apoa4b.1/cnp/mycbp2/plxnc1/frya/dagla/plxnb1b/epha4a
GO:0009267	cellular response to starvation	2	0.15977	0.59663	0.530536	nuak2/nupr1b
GO:0043244	regulation of protein complex disassembly	2	0.15977	0.59663	0.530536	gsna/eps8a
GO:0050727	regulation of inflammatory response	2	0.15977	0.59663	0.530536	cxcr4b/bcl6a
GO:1903034	regulation of response to wounding	2	0.15977	0.59663	0.530536	cxcr4b/epha4a
GO:0006754	ATP biosynthetic process	3	0.161904	0.60314	0.536325	pgam1a/pfklb/tpi1b
GO:0010469	regulation of signaling receptor activity	2	0.167011	0.61553	0.547342	arrb2b/gcga
GO:0035082	axoneme assembly	2	0.167011	0.61553	0.547342	drc1/stk36
GO:0050768	negative regulation of neurogenesis	2	0.167011	0.61553	0.547342	lfng/epha4a
GO:0051346	negative regulation of hydrolase activity	2	0.167011	0.61553	0.547342	bcl2l1/timp2a
GO:0090407	organophosphate biosynthetic process	9	0.168799	0.61553	0.547342	chpt1/pgam1a/impdh1b/naprt/upp1/pfklb/tpi1b/hrh3/gk5
GO:0060047	heart contraction	5	0.168886	0.61553	0.547342	adrb2b/bag3/smyd2a/flt1/taf1a
GO:0061564	axon development	10	0.169892	0.61553	0.547342	myo9aa/cxcr4b/anos1a/hmgb1a/cnp/mycbp2/plxnc1/dagla/plxnb1b/epha4a
GO:0048638	regulation of developmental growth	3	0.171894	0.61553	0.547342	cxcr4b/epha4a/igfbp2b
GO:0009144	purine nucleoside triphosphate metabolic process	5	0.172259	0.61553	0.547342	pgam1a/impdh1b/opa1/pfklb/tpi1b
GO:0001816	cytokine production	2	0.174306	0.61553	0.547342	mt2/csk
GO:0007586	digestion	2	0.174306	0.61553	0.547342	apoa4b.3/apoa4b.1
GO:0010975	regulation of neuron projection development	4	0.175514	0.61553	0.547342	cxcr4b/plxnc1/plxnb1b/epha4a
GO:0031016	pancreas development	5	0.175658	0.61553	0.547342	ins/bhmt/ppdpfa/gcga/lepr
GO:0045859	regulation of protein kinase activity	5	0.175658	0.61553	0.547342	trib3/gadd45ba/si:ch211-171h4.3/map2k6/trib1
GO:0010629	negative regulation of gene expression	13	0.175762	0.61553	0.547342	cry1aa/cipca/ncbp2/casc3/smyd2a/pbxip1b/cry1ab/cited4a/bhlhe41/chac1/si:ch211-132b12.7/cry2/cry1bb
GO:0048675	axon extension	3	0.176953	0.61553	0.547342	cxcr4b/plxnb1b/epha4a
GO:0071900	regulation of protein serine/threonine kinase activity	3	0.176953	0.61553	0.547342	trib3/gadd45ba/trib1
GO:1902905	positive regulation of supramolecular fiber organization	3	0.176953	0.61553	0.547342	gsna/gmfb/limk1a
GO:0003015	heart process	5	0.179082	0.61553	0.547342	adrb2b/bag3/smyd2a/flt1/taf1a
GO:0009199	ribonucleoside triphosphate metabolic process	5	0.182532	0.61553	0.547342	pgam1a/impdh1b/opa1/pfklb/tpi1b
GO:0001993	regulation of systemic arterial blood pressure by norepinephrine-epinephrine	1	0.186471	0.61553	0.547342	adrb2b
GO:0003310	pancreatic A cell differentiation	1	0.186471	0.61553	0.547342	ins
GO:0006222	UMP biosynthetic process	1	0.186471	0.61553	0.547342	upp1
GO:0006509	membrane protein ectodomain proteolysis	1	0.186471	0.61553	0.547342	timp2a
GO:0006534	cysteine metabolic process	1	0.186471	0.61553	0.547342	cbsb
GO:0006880	intracellular sequestering of iron ion	1	0.186471	0.61553	0.547342	zgc:198419
GO:0007097	nuclear migration	1	0.186471	0.61553	0.547342	cetn4
GO:0009173	pyrimidine ribonucleoside monophosphate metabolic process	1	0.186471	0.61553	0.547342	upp1
GO:0009174	pyrimidine ribonucleoside monophosphate biosynthetic process	1	0.186471	0.61553	0.547342	upp1
GO:0010737	protein kinase A signaling	1	0.186471	0.61553	0.547342	gcga
GO:0010771	negative regulation of cell morphogenesis involved in differentiation	1	0.186471	0.61553	0.547342	epha4a
GO:0032388	positive regulation of intracellular transport	1	0.186471	0.61553	0.547342	ncbp2
GO:0043297	apical junction assembly	1	0.186471	0.61553	0.547342	ptpn13
GO:0045292	mRNA cis splicing, via spliceosome	1	0.186471	0.61553	0.547342	ncbp2
GO:0046049	UMP metabolic process	1	0.186471	0.61553	0.547342	upp1
GO:0046627	negative regulation of insulin receptor signaling pathway	1	0.186471	0.61553	0.547342	socs1a
GO:0051647	nucleus localization	1	0.186471	0.61553	0.547342	cetn4
GO:0055062	phosphate ion homeostasis	1	0.186471	0.61553	0.547342	enpp1
GO:0055078	sodium ion homeostasis	1	0.186471	0.61553	0.547342	slc9a3r1a
GO:0070830	bicellular tight junction assembly	1	0.186471	0.61553	0.547342	ptpn13
GO:0071622	regulation of granulocyte chemotaxis	1	0.186471	0.61553	0.547342	cxcr4b
GO:0072505	divalent inorganic anion homeostasis	1	0.186471	0.61553	0.547342	enpp1
GO:0072506	trivalent inorganic anion homeostasis	1	0.186471	0.61553	0.547342	enpp1
GO:0097577	sequestering of iron ion	1	0.186471	0.61553	0.547342	zgc:198419
GO:1900077	negative regulation of cellular response to insulin stimulus	1	0.186471	0.61553	0.547342	socs1a
GO:1990138	neuron projection extension	3	0.187194	0.61553	0.547342	cxcr4b/plxnb1b/epha4a
GO:0080134	regulation of response to stress	6	0.187435	0.61553	0.547342	cxcr4b/bcl6a/sesn1/socs1a/smyd2a/epha4a
GO:0002683	negative regulation of immune system process	2	0.189043	0.61553	0.547342	cxcr4b/socs1a
GO:0030516	regulation of axon extension	2	0.189043	0.61553	0.547342	cxcr4b/epha4a
GO:0031668	cellular response to extracellular stimulus	2	0.189043	0.61553	0.547342	nuak2/nupr1b
GO:0031669	cellular response to nutrient levels	2	0.189043	0.61553	0.547342	nuak2/nupr1b
GO:0051017	actin filament bundle assembly	2	0.189043	0.61553	0.547342	eps8a/limk1a
GO:0009259	ribonucleotide metabolic process	7	0.189051	0.61553	0.547342	pgam1a/impdh1b/opa1/upp1/pfklb/tpi1b/hrh3
GO:0051188	cofactor biosynthetic process	5	0.189503	0.61553	0.547342	pgam1a/naprt/fpgs/pfklb/tpi1b
GO:0032147	activation of protein kinase activity	3	0.192371	0.61553	0.547342	gadd45ba/si:ch211-171h4.3/map2k6
GO:0030163	protein catabolic process	11	0.192607	0.61553	0.547342	ctsla/timp2a/ctsc/cul4a/trib3/cdc34b/nedd4l/lonrf1/usp2b/trib1/sharpin
GO:0032535	regulation of cellular component size	5	0.193024	0.61553	0.547342	cxcr4b/gsna/eps8a/gmfb/epha4a
GO:0007162	negative regulation of cell adhesion	2	0.196474	0.61553	0.547342	plxnc1/plxnb1b
GO:0015748	organophosphate ester transport	2	0.196474	0.61553	0.547342	apoa4b.3/apoa4b.1
GO:0010639	negative regulation of organelle organization	3	0.20283	0.61553	0.547342	gsna/eps8a/gmfb
GO:0031347	regulation of defense response	3	0.20283	0.61553	0.547342	cxcr4b/bcl6a/socs1a
GO:0002474	antigen processing and presentation of peptide antigen via MHC class I	1	0.203093	0.61553	0.547342	erap2
GO:0006000	fructose metabolic process	1	0.203093	0.61553	0.547342	pfkfb4b
GO:0006002	fructose 6-phosphate metabolic process	1	0.203093	0.61553	0.547342	pfklb
GO:0006751	glutathione catabolic process	1	0.203093	0.61553	0.547342	chac1
GO:0007612	learning	1	0.203093	0.61553	0.547342	pcxa
GO:0008053	mitochondrial fusion	1	0.203093	0.61553	0.547342	opa1
GO:0010594	regulation of endothelial cell migration	1	0.203093	0.61553	0.547342	mt2
GO:0010632	regulation of epithelial cell migration	1	0.203093	0.61553	0.547342	mt2
GO:0010955	negative regulation of protein processing	1	0.203093	0.61553	0.547342	chac1
GO:0021654	rhombomere boundary formation	1	0.203093	0.61553	0.547342	epha4a
GO:0030431	sleep	1	0.203093	0.61553	0.547342	bhlhe41
GO:0032231	regulation of actin filament bundle assembly	1	0.203093	0.61553	0.547342	limk1a
GO:0033336	caudal fin development	1	0.203093	0.61553	0.547342	smyd2a
GO:0042559	pteridine-containing compound biosynthetic process	1	0.203093	0.61553	0.547342	fpgs
GO:0043535	regulation of blood vessel endothelial cell migration	1	0.203093	0.61553	0.547342	mt2
GO:0044036	cell wall macromolecule metabolic process	1	0.203093	0.61553	0.547342	lyz
GO:0045776	negative regulation of blood pressure	1	0.203093	0.61553	0.547342	adrb2b
GO:0046626	regulation of insulin receptor signaling pathway	1	0.203093	0.61553	0.547342	socs1a
GO:0048002	antigen processing and presentation of peptide antigen	1	0.203093	0.61553	0.547342	erap2
GO:0048009	insulin-like growth factor receptor signaling pathway	1	0.203093	0.61553	0.547342	igfbp2b
GO:0050926	regulation of positive chemotaxis	1	0.203093	0.61553	0.547342	cxcr4b
GO:0050927	positive regulation of positive chemotaxis	1	0.203093	0.61553	0.547342	cxcr4b
GO:0050930	induction of positive chemotaxis	1	0.203093	0.61553	0.547342	cxcr4b
GO:0070613	regulation of protein processing	1	0.203093	0.61553	0.547342	chac1
GO:1900076	regulation of cellular response to insulin stimulus	1	0.203093	0.61553	0.547342	socs1a
GO:1901654	response to ketone	1	0.203093	0.61553	0.547342	ndor1
GO:1902882	regulation of response to oxidative stress	1	0.203093	0.61553	0.547342	sesn1
GO:1903317	regulation of protein maturation	1	0.203093	0.61553	0.547342	chac1
GO:1903318	negative regulation of protein maturation	1	0.203093	0.61553	0.547342	chac1
GO:0009152	purine ribonucleotide biosynthetic process	5	0.203724	0.61553	0.547342	pgam1a/impdh1b/pfklb/tpi1b/hrh3
GO:0043549	regulation of kinase activity	5	0.203724	0.61553	0.547342	trib3/gadd45ba/si:ch211-171h4.3/map2k6/trib1
GO:0045214	sarcomere organization	2	0.20394	0.61553	0.547342	mybpc1/smyd2a
GO:0071496	cellular response to external stimulus	2	0.20394	0.61553	0.547342	nuak2/nupr1b
GO:0006164	purine nucleotide biosynthetic process	5	0.207335	0.61553	0.547342	pgam1a/impdh1b/pfklb/tpi1b/hrh3
GO:0001578	microtubule bundle formation	2	0.211438	0.61553	0.547342	drc1/stk36
GO:0010721	negative regulation of cell development	2	0.211438	0.61553	0.547342	lfng/epha4a
GO:0019751	polyol metabolic process	2	0.211438	0.61553	0.547342	tpi1b/gk5
GO:0031290	retinal ganglion cell axon guidance	2	0.211438	0.61553	0.547342	cxcr4b/mycbp2
GO:0043484	regulation of RNA splicing	2	0.211438	0.61553	0.547342	rbm10/esrp2
GO:0045010	actin nucleation	2	0.211438	0.61553	0.547342	gsna/gmfb
GO:0097190	apoptotic signaling pathway	4	0.212934	0.61553	0.547342	casp8l1/bcl2l1/bcl6a/dedd1
GO:0051495	positive regulation of cytoskeleton organization	3	0.213419	0.61553	0.547342	gsna/gmfb/limk1a
GO:0007265	Ras protein signal transduction	6	0.215909	0.61553	0.547342	arhgef5/si:ch73-15b2.5/si:dkey-91m11.5/arhgef10lb/mmd/rasal3
GO:0097435	supramolecular fiber organization	9	0.216457	0.61553	0.547342	myh7/gsna/eps8a/gmfb/mybpc1/smyd2a/frya/myo18aa/limk1a
GO:0009611	response to wounding	7	0.217716	0.61553	0.547342	cxcr4b/lfng/hmgb1a/cnp/rhoca/epha4a/hbegfa
GO:0032984	protein-containing complex disassembly	3	0.218757	0.61553	0.547342	gsna/napab/eps8a
GO:0043086	negative regulation of catalytic activity	3	0.218757	0.61553	0.547342	bcl2l1/timp2a/hrh3
GO:0044262	cellular carbohydrate metabolic process	3	0.218757	0.61553	0.547342	pgam1a/tpi1b/gk5
GO:0007015	actin filament organization	6	0.219162	0.61553	0.547342	gsna/eps8a/gmfb/mybpc1/frya/limk1a
GO:0001819	positive regulation of cytokine production	1	0.219377	0.61553	0.547342	mt2
GO:0006183	GTP biosynthetic process	1	0.219377	0.61553	0.547342	impdh1b
GO:0006360	transcription by RNA polymerase I	1	0.219377	0.61553	0.547342	taf1a
GO:0006613	cotranslational protein targeting to membrane	1	0.219377	0.61553	0.547342	ssr1
GO:0007611	learning or memory	1	0.219377	0.61553	0.547342	pcxa
GO:0019432	triglyceride biosynthetic process	1	0.219377	0.61553	0.547342	lpin1
GO:0019835	cytolysis	1	0.219377	0.61553	0.547342	mmd
GO:0030308	negative regulation of cell growth	1	0.219377	0.61553	0.547342	epha4a
GO:0030330	DNA damage response, signal transduction by p53 class mediator	1	0.219377	0.61553	0.547342	smyd2a
GO:0030500	regulation of bone mineralization	1	0.219377	0.61553	0.547342	enpp1
GO:0031279	regulation of cyclase activity	1	0.219377	0.61553	0.547342	hrh3
GO:0032094	response to food	1	0.219377	0.61553	0.547342	nucb2a
GO:0033619	membrane protein proteolysis	1	0.219377	0.61553	0.547342	timp2a
GO:0034315	regulation of Arp2/3 complex-mediated actin nucleation	1	0.219377	0.61553	0.547342	gmfb
GO:0036302	atrioventricular canal development	1	0.219377	0.61553	0.547342	mmd
GO:0042177	negative regulation of protein catabolic process	1	0.219377	0.61553	0.547342	timp2a
GO:0046460	neutral lipid biosynthetic process	1	0.219377	0.61553	0.547342	lpin1
GO:0046463	acylglycerol biosynthetic process	1	0.219377	0.61553	0.547342	lpin1
GO:0048670	regulation of collateral sprouting	1	0.219377	0.61553	0.547342	epha4a
GO:0050918	positive chemotaxis	1	0.219377	0.61553	0.547342	cxcr4b
GO:0051339	regulation of lyase activity	1	0.219377	0.61553	0.547342	hrh3
GO:0071554	cell wall organization or biogenesis	1	0.219377	0.61553	0.547342	lyz
GO:0072132	mesenchyme morphogenesis	1	0.219377	0.61553	0.547342	mmd
GO:0097755	positive regulation of blood vessel diameter	1	0.219377	0.61553	0.547342	adrb2b
GO:1902622	regulation of neutrophil migration	1	0.219377	0.61553	0.547342	cxcr4b
GO:2000542	negative regulation of gastrulation	1	0.219377	0.61553	0.547342	fdx1
GO:0045664	regulation of neuron differentiation	5	0.221981	0.617689	0.549262	cxcr4b/lfng/plxnc1/plxnb1b/epha4a
GO:0006820	anion transport	7	0.22363	0.617689	0.549262	apoa4b.3/slc26a6/slc20a1b/apoa4b.1/slc20a2/slc26a3.1/slc25a1b
GO:0051603	proteolysis involved in cellular protein catabolic process	10	0.223941	0.617689	0.549262	ctsla/ctsc/cul4a/trib3/cdc34b/nedd4l/lonrf1/usp2b/trib1/sharpin
GO:0009141	nucleoside triphosphate metabolic process	5	0.225691	0.617689	0.549262	pgam1a/impdh1b/opa1/pfklb/tpi1b
GO:0009187	cyclic nucleotide metabolic process	2	0.226508	0.617689	0.549262	cnp/hrh3
GO:0051028	mRNA transport	2	0.226508	0.617689	0.549262	ncbp2/casc3
GO:0051261	protein depolymerization	2	0.226508	0.617689	0.549262	gsna/eps8a
GO:0052548	regulation of endopeptidase activity	2	0.226508	0.617689	0.549262	bcl2l1/timp2a
GO:0061572	actin filament bundle organization	2	0.226508	0.617689	0.549262	eps8a/limk1a
GO:0035023	regulation of Rho protein signal transduction	4	0.230232	0.617689	0.549262	arhgef5/si:ch73-15b2.5/si:dkey-91m11.5/arhgef10lb
GO:0006397	mRNA processing	7	0.232606	0.617689	0.549262	rbm10/ncbp2/casc3/snrpd3/gpatch1/snrpa1/esrp2
GO:0009161	ribonucleoside monophosphate metabolic process	5	0.233166	0.617689	0.549262	pgam1a/impdh1b/upp1/pfklb/tpi1b
GO:0014070	response to organic cyclic compound	5	0.233166	0.617689	0.549262	cyp1a/ahr1a/pparda/nr1d1/rorab
GO:0044257	cellular protein catabolic process	10	0.233554	0.617689	0.549262	ctsla/ctsc/cul4a/trib3/cdc34b/nedd4l/lonrf1/usp2b/trib1/sharpin
GO:0007169	transmembrane receptor protein tyrosine kinase signaling pathway	8	0.234114	0.617689	0.549262	fgfr4/socs1a/flt1/csk/epha4a/epha3/hbegfa/igfbp2b
GO:0071396	cellular response to lipid	4	0.234611	0.617689	0.549262	pparda/nfe2l2a/nr1d1/rorab
GO:0002042	cell migration involved in sprouting angiogenesis	1	0.235329	0.617689	0.549262	mt2
GO:0009129	pyrimidine nucleoside monophosphate metabolic process	1	0.235329	0.617689	0.549262	upp1
GO:0009130	pyrimidine nucleoside monophosphate biosynthetic process	1	0.235329	0.617689	0.549262	upp1
GO:0019748	secondary metabolic process	1	0.235329	0.617689	0.549262	pgam1a
GO:0021594	rhombomere formation	1	0.235329	0.617689	0.549262	epha4a
GO:0021986	habenula development	1	0.235329	0.617689	0.549262	mycbp2
GO:0022011	myelination in peripheral nervous system	1	0.235329	0.617689	0.549262	ndrg1a
GO:0030038	contractile actin filament bundle assembly	1	0.235329	0.617689	0.549262	limk1a
GO:0030814	regulation of cAMP metabolic process	1	0.235329	0.617689	0.549262	hrh3
GO:0030817	regulation of cAMP biosynthetic process	1	0.235329	0.617689	0.549262	hrh3
GO:0032292	peripheral nervous system axon ensheathment	1	0.235329	0.617689	0.549262	ndrg1a
GO:0032968	positive regulation of transcription elongation from RNA polymerase II promoter	1	0.235329	0.617689	0.549262	gtf2f1
GO:0043112	receptor metabolic process	1	0.235329	0.617689	0.549262	arrb2b
GO:0043149	stress fiber assembly	1	0.235329	0.617689	0.549262	limk1a
GO:0043154	negative regulation of cysteine-type endopeptidase activity involved in apoptotic process	1	0.235329	0.617689	0.549262	bcl2l1
GO:0044332	Wnt signaling pathway involved in dorsal/ventral axis specification	1	0.235329	0.617689	0.549262	egf
GO:0046688	response to copper ion	1	0.235329	0.617689	0.549262	mt2
GO:0048679	regulation of axon regeneration	1	0.235329	0.617689	0.549262	epha4a
GO:0051125	regulation of actin nucleation	1	0.235329	0.617689	0.549262	gmfb
GO:0055003	cardiac myofibril assembly	1	0.235329	0.617689	0.549262	myh7
GO:0070570	regulation of neuron projection regeneration	1	0.235329	0.617689	0.549262	epha4a
GO:1901070	guanosine-containing compound biosynthetic process	1	0.235329	0.617689	0.549262	impdh1b
GO:0019220	regulation of phosphate metabolic process	9	0.236873	0.619637	0.550995	pgam1a/trib3/gadd45ba/socs1a/inhbab/hrh3/si:ch211-171h4.3/map2k6/trib1
GO:0051174	regulation of phosphorus metabolic process	9	0.236873	0.619637	0.550995	pgam1a/trib3/gadd45ba/socs1a/inhbab/hrh3/si:ch211-171h4.3/map2k6/trib1
GO:0030833	regulation of actin filament polymerization	3	0.240367	0.622621	0.553648	gsna/eps8a/gmfb
GO:0007272	ensheathment of neurons	2	0.241652	0.622621	0.553648	fbxw7/ndrg1a
GO:0008366	axon ensheathment	2	0.241652	0.622621	0.553648	fbxw7/ndrg1a
GO:0042552	myelination	2	0.241652	0.622621	0.553648	fbxw7/ndrg1a
GO:0046165	alcohol biosynthetic process	2	0.241652	0.622621	0.553648	apoa4b.3/apoa4b.1
GO:1902532	negative regulation of intracellular signal transduction	4	0.247865	0.622621	0.553648	bcl2l1/bcl6a/socs1a/rasal3
GO:0009123	nucleoside monophosphate metabolic process	5	0.248321	0.622621	0.553648	pgam1a/impdh1b/upp1/pfklb/tpi1b
GO:0006352	DNA-templated transcription, initiation	2	0.249242	0.622621	0.553648	gtf2f1/brf1a
GO:0031346	positive regulation of cell projection organization	2	0.249242	0.622621	0.553648	plxnc1/plxnb1b
GO:0061387	regulation of extent of cell growth	2	0.249242	0.622621	0.553648	cxcr4b/epha4a
GO:0006026	aminoglycan catabolic process	1	0.250956	0.622621	0.553648	pglyrp2
GO:0006760	folic acid-containing compound metabolic process	1	0.250956	0.622621	0.553648	fpgs
GO:0006767	water-soluble vitamin metabolic process	1	0.250956	0.622621	0.553648	mmadhc
GO:0007634	optokinetic behavior	1	0.250956	0.622621	0.553648	dagla
GO:0008354	germ cell migration	1	0.250956	0.622621	0.553648	cxcr4b
GO:0009067	aspartate family amino acid biosynthetic process	1	0.250956	0.622621	0.553648	bhmt
GO:0009435	NAD biosynthetic process	1	0.250956	0.622621	0.553648	naprt
GO:0009988	cell-cell recognition	1	0.250956	0.622621	0.553648	epha4a
GO:0010675	regulation of cellular carbohydrate metabolic process	1	0.250956	0.622621	0.553648	pgam1a
GO:0014866	skeletal myofibril assembly	1	0.250956	0.622621	0.553648	myo18aa
GO:0030878	thyroid gland development	1	0.250956	0.622621	0.553648	bcl2l1
GO:0032465	regulation of cytokinesis	1	0.250956	0.622621	0.553648	rab11fip4b
GO:0044273	sulfur compound catabolic process	1	0.250956	0.622621	0.553648	chac1
GO:0045992	negative regulation of embryonic development	1	0.250956	0.622621	0.553648	fdx1
GO:0048668	collateral sprouting	1	0.250956	0.622621	0.553648	epha4a
GO:0048859	formation of anatomical boundary	1	0.250956	0.622621	0.553648	epha4a
GO:0050650	chondroitin sulfate proteoglycan biosynthetic process	1	0.250956	0.622621	0.553648	chst7
GO:0050829	defense response to Gram-negative bacterium	1	0.250956	0.622621	0.553648	lyz
GO:0055083	monovalent inorganic anion homeostasis	1	0.250956	0.622621	0.553648	enpp1
GO:0060285	cilium-dependent cell motility	1	0.250956	0.622621	0.553648	drc1
GO:0060841	venous blood vessel development	1	0.250956	0.622621	0.553648	flt1
GO:1903035	negative regulation of response to wounding	1	0.250956	0.622621	0.553648	epha4a
GO:0043401	steroid hormone mediated signaling pathway	3	0.251304	0.622621	0.553648	pparda/nr1d1/rorab
GO:1901701	cellular response to oxygen-containing compound	4	0.25679	0.631275	0.561344	nfe2l2a/ndor1/socs1a/gcga
GO:0042157	lipoprotein metabolic process	3	0.2568	0.631275	0.561344	apoa4b.3/apoa4b.1/si:ch73-233k15.2
GO:0048588	developmental cell growth	3	0.2568	0.631275	0.561344	cxcr4b/plxnb1b/epha4a
GO:0052547	regulation of peptidase activity	2	0.256838	0.631275	0.561344	bcl2l1/timp2a
GO:0055007	cardiac muscle cell differentiation	2	0.256838	0.631275	0.561344	myh7/opa1
GO:0032271	regulation of protein polymerization	3	0.262312	0.631357	0.561417	gsna/eps8a/gmfb
GO:0008015	blood circulation	7	0.263347	0.631357	0.561417	adrb2b/erap2/egf/bag3/smyd2a/flt1/taf1a
GO:0002573	myeloid leukocyte differentiation	2	0.264439	0.631357	0.561417	casp8l1/brf1a
GO:0019216	regulation of lipid metabolic process	2	0.264439	0.631357	0.561417	apoa4b.3/apoa4b.1
GO:0032101	regulation of response to external stimulus	4	0.265778	0.631357	0.561417	cxcr4b/bcl6a/arrb2b/epha4a
GO:0001539	cilium or flagellum-dependent cell motility	1	0.266264	0.631357	0.561417	drc1
GO:0002027	regulation of heart rate	1	0.266264	0.631357	0.561417	adrb2b
GO:0007129	synapsis	1	0.266264	0.631357	0.561417	syce2
GO:0007413	axonal fasciculation	1	0.266264	0.631357	0.561417	anos1a
GO:0008078	mesodermal cell migration	1	0.266264	0.631357	0.561417	epha3
GO:0010977	negative regulation of neuron projection development	1	0.266264	0.631357	0.561417	epha4a
GO:0014823	response to activity	1	0.266264	0.631357	0.561417	pparda
GO:0019369	arachidonic acid metabolic process	1	0.266264	0.631357	0.561417	cyp2k16
GO:0030497	fatty acid elongation	1	0.266264	0.631357	0.561417	hacd1
GO:0031167	rRNA methylation	1	0.266264	0.631357	0.561417	emg1
GO:0032786	positive regulation of DNA-templated transcription, elongation	1	0.266264	0.631357	0.561417	gtf2f1
GO:0038034	signal transduction in absence of ligand	1	0.266264	0.631357	0.561417	bcl2l1
GO:0050654	chondroitin sulfate proteoglycan metabolic process	1	0.266264	0.631357	0.561417	chst7
GO:0051098	regulation of binding	1	0.266264	0.631357	0.561417	arrb2b
GO:0051896	regulation of protein kinase B signaling	1	0.266264	0.631357	0.561417	socs1a
GO:0097192	extrinsic apoptotic signaling pathway in absence of ligand	1	0.266264	0.631357	0.561417	bcl2l1
GO:0098781	ncRNA transcription	1	0.266264	0.631357	0.561417	rpap2
GO:0106030	neuron projection fasciculation	1	0.266264	0.631357	0.561417	anos1a
GO:0007264	small GTPase mediated signal transduction	8	0.26822	0.635021	0.564674	arhgef5/si:dkey-166d12.2/rhoca/si:ch73-15b2.5/si:dkey-91m11.5/arhgef10lb/mmd/rasal3
GO:0055002	striated muscle cell development	5	0.271503	0.636647	0.56612	myh7/opa1/mybpc1/smyd2a/myo18aa
GO:0045216	cell-cell junction organization	2	0.27204	0.636647	0.56612	csk/ptpn13
GO:0003013	circulatory system process	7	0.272788	0.636647	0.56612	adrb2b/erap2/egf/bag3/smyd2a/flt1/taf1a
GO:0051338	regulation of transferase activity	5	0.275412	0.636647	0.56612	trib3/gadd45ba/si:ch211-171h4.3/map2k6/trib1
GO:0006511	ubiquitin-dependent protein catabolic process	8	0.276968	0.636647	0.56612	cul4a/trib3/cdc34b/nedd4l/lonrf1/usp2b/trib1/sharpin
GO:0007219	Notch signaling pathway	3	0.278933	0.636647	0.56612	lfng/chac1/fbxw7
GO:0071383	cellular response to steroid hormone stimulus	3	0.278933	0.636647	0.56612	pparda/nr1d1/rorab
GO:0050920	regulation of chemotaxis	2	0.279638	0.636647	0.56612	cxcr4b/arrb2b
GO:1901607	alpha-amino acid biosynthetic process	2	0.279638	0.636647	0.56612	cbsb/bhmt
GO:0003373	dynamin family protein polymerization involved in membrane fission	1	0.281261	0.636647	0.56612	opa1
GO:0003374	dynamin family protein polymerization involved in mitochondrial fission	1	0.281261	0.636647	0.56612	opa1
GO:0006024	glycosaminoglycan biosynthetic process	1	0.281261	0.636647	0.56612	chst7
GO:0006109	regulation of carbohydrate metabolic process	1	0.281261	0.636647	0.56612	pgam1a
GO:0006555	methionine metabolic process	1	0.281261	0.636647	0.56612	bhmt
GO:0009070	serine family amino acid biosynthetic process	1	0.281261	0.636647	0.56612	cbsb
GO:0030799	regulation of cyclic nucleotide metabolic process	1	0.281261	0.636647	0.56612	hrh3
GO:0030802	regulation of cyclic nucleotide biosynthetic process	1	0.281261	0.636647	0.56612	hrh3
GO:0031033	myosin filament organization	1	0.281261	0.636647	0.56612	mybpc1
GO:0031034	myosin filament assembly	1	0.281261	0.636647	0.56612	mybpc1
GO:0031345	negative regulation of cell projection organization	1	0.281261	0.636647	0.56612	epha4a
GO:0035914	skeletal muscle cell differentiation	1	0.281261	0.636647	0.56612	cdkn1a
GO:0043174	nucleoside salvage	1	0.281261	0.636647	0.56612	upp1
GO:0043491	protein kinase B signaling	1	0.281261	0.636647	0.56612	socs1a
GO:0050830	defense response to Gram-positive bacterium	1	0.281261	0.636647	0.56612	lyz
GO:0051053	negative regulation of DNA metabolic process	1	0.281261	0.636647	0.56612	igfbp2b
GO:0051222	positive regulation of protein transport	1	0.281261	0.636647	0.56612	gcga
GO:0071688	striated muscle myosin thick filament assembly	1	0.281261	0.636647	0.56612	mybpc1
GO:0071875	adrenergic receptor signaling pathway	1	0.281261	0.636647	0.56612	adrb2b
GO:0071880	adenylate cyclase-activating adrenergic receptor signaling pathway	1	0.281261	0.636647	0.56612	adrb2b
GO:1904951	positive regulation of establishment of protein localization	1	0.281261	0.636647	0.56612	gcga
GO:0019941	modification-dependent protein catabolic process	8	0.282843	0.639292	0.568472	cul4a/trib3/cdc34b/nedd4l/lonrf1/usp2b/trib1/sharpin
GO:0009150	purine ribonucleotide metabolic process	6	0.2837	0.64022	0.569297	pgam1a/impdh1b/opa1/pfklb/tpi1b/hrh3
GO:0008064	regulation of actin polymerization or depolymerization	3	0.284496	0.64022	0.569297	gsna/eps8a/gmfb
GO:0030832	regulation of actin filament length	3	0.284496	0.64022	0.569297	gsna/eps8a/gmfb
GO:0051258	protein polymerization	4	0.288486	0.642918	0.571697	gsna/eps8a/gmfb/opa1
GO:0010817	regulation of hormone levels	3	0.290069	0.642918	0.571697	hsd17b12a/cpn1/gcga
GO:0040007	growth	9	0.29062	0.642918	0.571697	cxcr4b/lfng/tgfbr2b/igfbp7/cyr61l2/plxnb1b/epha4a/hbegfa/igfbp2b
GO:0055065	metal ion homeostasis	6	0.29074	0.642918	0.571697	zgc:198419/tac4/slc9a3r1a/hephl1a/aco1/hmox1a
GO:0032259	methylation	5	0.291162	0.642918	0.571697	bhmt/smyd2a/comta/comtb/emg1
GO:0030334	regulation of cell migration	4	0.293062	0.642918	0.571697	mt2/cxcr4b/sst1.1/arrb2b
GO:0061008	hepaticobiliary system development	4	0.293062	0.642918	0.571697	fads2/cpn1/add3a/trib1
GO:0051960	regulation of nervous system development	6	0.294275	0.642918	0.571697	cxcr4b/lfng/plxnc1/fbxw7/plxnb1b/epha4a
GO:0001522	pseudouridine synthesis	1	0.295952	0.642918	0.571697	pus7l
GO:0001678	cellular glucose homeostasis	1	0.295952	0.642918	0.571697	gcga
GO:0006275	regulation of DNA replication	1	0.295952	0.642918	0.571697	igfbp2b
GO:0007632	visual behavior	1	0.295952	0.642918	0.571697	dagla
GO:0021538	epithalamus development	1	0.295952	0.642918	0.571697	mycbp2
GO:0030225	macrophage differentiation	1	0.295952	0.642918	0.571697	casp8l1
GO:0030808	regulation of nucleotide biosynthetic process	1	0.295952	0.642918	0.571697	hrh3
GO:0050890	cognition	1	0.295952	0.642918	0.571697	pcxa
GO:0051153	regulation of striated muscle cell differentiation	1	0.295952	0.642918	0.571697	smyd2a
GO:0070654	sensory epithelium regeneration	1	0.295952	0.642918	0.571697	hbegfa
GO:1900371	regulation of purine nucleotide biosynthetic process	1	0.295952	0.642918	0.571697	hrh3
GO:1903532	positive regulation of secretion by cell	1	0.295952	0.642918	0.571697	gcga
GO:1903825	organic acid transmembrane transport	1	0.295952	0.642918	0.571697	slc25a1b
GO:1905039	carboxylic acid transmembrane transport	1	0.295952	0.642918	0.571697	slc25a1b
GO:1990399	epithelium regeneration	1	0.295952	0.642918	0.571697	hbegfa
GO:0009725	response to hormone	6	0.297817	0.642918	0.571697	pparda/timp2a/nfe2l2a/socs1a/nr1d1/rorab
GO:0043632	modification-dependent macromolecule catabolic process	8	0.300658	0.642918	0.571697	cul4a/trib3/cdc34b/nedd4l/lonrf1/usp2b/trib1/sharpin
GO:0030041	actin filament polymerization	3	0.301236	0.642918	0.571697	gsna/eps8a/gmfb
GO:0033333	fin development	3	0.301236	0.642918	0.571697	cul4a/smyd2a/bmp1a
GO:0044089	positive regulation of cellular component biogenesis	3	0.301236	0.642918	0.571697	gsna/gmfb/limk1a
GO:0048545	response to steroid hormone	3	0.301236	0.642918	0.571697	pparda/nr1d1/rorab
GO:0008360	regulation of cell shape	2	0.302386	0.642918	0.571697	plxnc1/plxnb1b
GO:0008652	cellular amino acid biosynthetic process	2	0.302386	0.642918	0.571697	cbsb/bhmt
GO:0014904	myotube cell development	2	0.302386	0.642918	0.571697	mybpc1/myo18aa
GO:0019882	antigen processing and presentation	2	0.302386	0.642918	0.571697	erap2/si:busm1-266f07.2
GO:0034330	cell junction organization	2	0.302386	0.642918	0.571697	csk/ptpn13
GO:0045666	positive regulation of neuron differentiation	2	0.302386	0.642918	0.571697	plxnc1/plxnb1b
GO:0048741	skeletal muscle fiber development	2	0.302386	0.642918	0.571697	mybpc1/myo18aa
GO:0044265	cellular macromolecule catabolic process	12	0.305734	0.642918	0.571697	ncbp2/ctsla/ctsc/cul4a/casc3/trib3/cdc34b/nedd4l/lonrf1/usp2b/trib1/sharpin
GO:0120035	regulation of plasma membrane bounded cell projection organization	4	0.306843	0.642918	0.571697	cxcr4b/plxnc1/plxnb1b/epha4a
GO:0051130	positive regulation of cellular component organization	5	0.307066	0.642918	0.571697	gsna/gmfb/plxnc1/plxnb1b/limk1a
GO:0008361	regulation of cell size	2	0.309943	0.642918	0.571697	cxcr4b/epha4a
GO:0090130	tissue migration	2	0.309943	0.642918	0.571697	mt2/epha3
GO:0090150	establishment of protein localization to membrane	2	0.309943	0.642918	0.571697	slc9a3r1a/ssr1
GO:0001569	branching involved in blood vessel morphogenesis	1	0.310344	0.642918	0.571697	igfbp7
GO:0001676	long-chain fatty acid metabolic process	1	0.310344	0.642918	0.571697	cyp2k16
GO:0003094	glomerular filtration	1	0.310344	0.642918	0.571697	iqgap2
GO:0006636	unsaturated fatty acid biosynthetic process	1	0.310344	0.642918	0.571697	fads2
GO:0006940	regulation of smooth muscle contraction	1	0.310344	0.642918	0.571697	adrb2b
GO:0009408	response to heat	1	0.310344	0.642918	0.571697	dnaja3a
GO:0014044	Schwann cell development	1	0.310344	0.642918	0.571697	ndrg1a
GO:0021593	rhombomere morphogenesis	1	0.310344	0.642918	0.571697	epha4a
GO:0033338	medial fin development	1	0.310344	0.642918	0.571697	smyd2a
GO:0035904	aorta development	1	0.310344	0.642918	0.571697	cdkn1a
GO:0043113	receptor clustering	1	0.310344	0.642918	0.571697	slc9a3r1a
GO:0046580	negative regulation of Ras protein signal transduction	1	0.310344	0.642918	0.571697	rasal3
GO:0050730	regulation of peptidyl-tyrosine phosphorylation	1	0.310344	0.642918	0.571697	socs1a
GO:0051058	negative regulation of small GTPase mediated signal transduction	1	0.310344	0.642918	0.571697	rasal3
GO:0051147	regulation of muscle cell differentiation	1	0.310344	0.642918	0.571697	smyd2a
GO:0070897	DNA-templated transcriptional preinitiation complex assembly	1	0.310344	0.642918	0.571697	brf1a
GO:2000117	negative regulation of cysteine-type endopeptidase activity	1	0.310344	0.642918	0.571697	bcl2l1
GO:0043161	proteasome-mediated ubiquitin-dependent protein catabolic process	5	0.311063	0.642918	0.571697	trib3/cdc34b/lonrf1/trib1/sharpin
GO:0051493	regulation of cytoskeleton organization	5	0.311063	0.642918	0.571697	gsna/eps8a/gmfb/smyd2a/limk1a
GO:0090066	regulation of anatomical structure size	6	0.315649	0.645623	0.574102	adrb2b/cxcr4b/gsna/eps8a/gmfb/epha4a
GO:0031344	regulation of cell projection organization	4	0.316069	0.645623	0.574102	cxcr4b/plxnc1/plxnb1b/epha4a
GO:0006821	chloride transport	2	0.317484	0.645623	0.574102	slc26a6/slc26a3.1
GO:0007224	smoothened signaling pathway	2	0.317484	0.645623	0.574102	arrb2b/stk36
GO:0051050	positive regulation of transport	2	0.317484	0.645623	0.574102	ncbp2/gcga
GO:0043085	positive regulation of catalytic activity	7	0.317896	0.645623	0.574102	apoa4b.3/myo9aa/apoa4b.1/gadd45ba/myo9b/si:ch211-171h4.3/map2k6
GO:0008037	cell recognition	3	0.318024	0.645623	0.574102	anos1a/mycbp2/epha4a
GO:0044092	negative regulation of molecular function	3	0.318024	0.645623	0.574102	bcl2l1/timp2a/hrh3
GO:0006163	purine nucleotide metabolic process	6	0.319236	0.645623	0.574102	pgam1a/impdh1b/opa1/pfklb/tpi1b/hrh3
GO:0022604	regulation of cell morphogenesis	4	0.32069	0.645623	0.574102	cxcr4b/plxnc1/plxnb1b/epha4a
GO:0000038	very long-chain fatty acid metabolic process	1	0.324442	0.645623	0.574102	hacd1
GO:0000381	regulation of alternative mRNA splicing, via spliceosome	1	0.324442	0.645623	0.574102	rbm10
GO:0006855	drug transmembrane transport	1	0.324442	0.645623	0.574102	slc25a1b
GO:0009411	response to UV	1	0.324442	0.645623	0.574102	per2
GO:0036269	swimming behavior	1	0.324442	0.645623	0.574102	dagla
GO:0042761	very long-chain fatty acid biosynthetic process	1	0.324442	0.645623	0.574102	hacd1
GO:0045143	homologous chromosome segregation	1	0.324442	0.645623	0.574102	syce2
GO:0050796	regulation of insulin secretion	1	0.324442	0.645623	0.574102	gcga
GO:0051238	sequestering of metal ion	1	0.324442	0.645623	0.574102	zgc:198419
GO:0072089	stem cell proliferation	1	0.324442	0.645623	0.574102	cyp27b1
GO:0090148	membrane fission	1	0.324442	0.645623	0.574102	opa1
GO:0090276	regulation of peptide hormone secretion	1	0.324442	0.645623	0.574102	gcga
GO:0098659	inorganic cation import across plasma membrane	1	0.324442	0.645623	0.574102	slc9a7
GO:0098739	import across plasma membrane	1	0.324442	0.645623	0.574102	slc9a7
GO:0099587	inorganic ion import across plasma membrane	1	0.324442	0.645623	0.574102	slc9a7
GO:1903670	regulation of sprouting angiogenesis	1	0.324442	0.645623	0.574102	mt2
GO:0001932	regulation of protein phosphorylation	7	0.324454	0.645623	0.574102	trib3/gadd45ba/socs1a/inhbab/si:ch211-171h4.3/map2k6/trib1
GO:0001666	response to hypoxia	2	0.325006	0.645623	0.574102	ppiab/hmox1a
GO:0008217	regulation of blood pressure	2	0.325006	0.645623	0.574102	adrb2b/erap2
GO:0048916	posterior lateral line development	2	0.325006	0.645623	0.574102	cxcr4b/anos1a
GO:0051345	positive regulation of hydrolase activity	4	0.325317	0.645623	0.574102	apoa4b.3/myo9aa/apoa4b.1/myo9b
GO:0022603	regulation of anatomical structure morphogenesis	8	0.327833	0.649783	0.577801	fdx1/mt2/cxcr4b/per2/smyd2a/plxnc1/plxnb1b/epha4a
GO:0060284	regulation of cell development	6	0.330034	0.652353	0.580086	cxcr4b/lfng/smyd2a/plxnc1/plxnb1b/epha4a
GO:0055001	muscle cell development	5	0.331143	0.652353	0.580086	myh7/opa1/mybpc1/smyd2a/myo18aa
GO:0030838	positive regulation of actin filament polymerization	2	0.332506	0.652353	0.580086	gsna/gmfb
GO:0036293	response to decreased oxygen levels	2	0.332506	0.652353	0.580086	ppiab/hmox1a
GO:0040017	positive regulation of locomotion	2	0.332506	0.652353	0.580086	mt2/cxcr4b
GO:0042180	cellular ketone metabolic process	2	0.332506	0.652353	0.580086	apoa4b.3/apoa4b.1
GO:0042445	hormone metabolic process	2	0.332506	0.652353	0.580086	hsd17b12a/cpn1
GO:0045454	cell redox homeostasis	2	0.332506	0.652353	0.580086	nhlrc2/txnl1
GO:0006869	lipid transport	4	0.334583	0.653673	0.58126	apoa4b.3/apoa4b.1/abca1a/si:ch73-233k15.2
GO:0000413	protein peptidyl-prolyl isomerization	1	0.338252	0.653673	0.58126	ppiab
GO:0006023	aminoglycan biosynthetic process	1	0.338252	0.653673	0.58126	chst7
GO:0014037	Schwann cell differentiation	1	0.338252	0.653673	0.58126	ndrg1a
GO:0019674	NAD metabolic process	1	0.338252	0.653673	0.58126	naprt
GO:0021546	rhombomere development	1	0.338252	0.653673	0.58126	epha4a
GO:0034243	regulation of transcription elongation from RNA polymerase II promoter	1	0.338252	0.653673	0.58126	gtf2f1
GO:0042446	hormone biosynthetic process	1	0.338252	0.653673	0.58126	hsd17b12a
GO:0042770	signal transduction in response to DNA damage	1	0.338252	0.653673	0.58126	smyd2a
GO:1900542	regulation of purine nucleotide metabolic process	1	0.338252	0.653673	0.58126	hrh3
GO:1902476	chloride transmembrane transport	1	0.338252	0.653673	0.58126	slc26a6
GO:1903510	mucopolysaccharide metabolic process	1	0.338252	0.653673	0.58126	chst7
GO:2000145	regulation of cell motility	4	0.339221	0.653781	0.581356	mt2/cxcr4b/sst1.1/arrb2b
GO:0070482	response to oxygen levels	2	0.339982	0.653781	0.581356	ppiab/hmox1a
GO:0009755	hormone-mediated signaling pathway	3	0.340423	0.653781	0.581356	pparda/nr1d1/rorab
GO:0045860	positive regulation of protein kinase activity	3	0.340423	0.653781	0.581356	gadd45ba/si:ch211-171h4.3/map2k6
GO:0048736	appendage development	3	0.340423	0.653781	0.581356	cul4a/smyd2a/bmp1a
GO:0030036	actin cytoskeleton organization	9	0.347173	0.661624	0.58833	myh7/gsna/eps8a/gmfb/mybpc1/smyd2a/frya/myo18aa/limk1a
GO:0044087	regulation of cellular component biogenesis	5	0.347297	0.661624	0.58833	gsna/eps8a/gmfb/smyd2a/limk1a
GO:0032273	positive regulation of protein polymerization	2	0.347432	0.661624	0.58833	gsna/gmfb
GO:0007266	Rho protein signal transduction	4	0.348503	0.661624	0.58833	arhgef5/si:ch73-15b2.5/si:dkey-91m11.5/arhgef10lb
GO:0033674	positive regulation of kinase activity	3	0.351608	0.661624	0.58833	gadd45ba/si:ch211-171h4.3/map2k6
GO:0000380	alternative mRNA splicing, via spliceosome	1	0.351782	0.661624	0.58833	rbm10
GO:0003044	regulation of systemic arterial blood pressure mediated by a chemical signal	1	0.351782	0.661624	0.58833	adrb2b
GO:0006383	transcription by RNA polymerase III	1	0.351782	0.661624	0.58833	brf1a
GO:0007043	cell-cell junction assembly	1	0.351782	0.661624	0.58833	ptpn13
GO:0009218	pyrimidine ribonucleotide metabolic process	1	0.351782	0.661624	0.58833	upp1
GO:0009220	pyrimidine ribonucleotide biosynthetic process	1	0.351782	0.661624	0.58833	upp1
GO:0030073	insulin secretion	1	0.351782	0.661624	0.58833	gcga
GO:0046132	pyrimidine ribonucleoside biosynthetic process	1	0.351782	0.661624	0.58833	upp1
GO:0048264	determination of ventral identity	1	0.351782	0.661624	0.58833	bmp1a
GO:0050921	positive regulation of chemotaxis	1	0.351782	0.661624	0.58833	cxcr4b
GO:0051047	positive regulation of secretion	1	0.351782	0.661624	0.58833	gcga
GO:0060319	primitive erythrocyte differentiation	1	0.351782	0.661624	0.58833	numb
GO:0061061	muscle structure development	8	0.352335	0.66186	0.58854	cdkn1a/myh7/arrb2b/bag3/opa1/mybpc1/smyd2a/myo18aa
GO:0015711	organic anion transport	4	0.353146	0.662577	0.589178	apoa4b.3/apoa4b.1/slc26a3.1/slc25a1b
GO:0000956	nuclear-transcribed mRNA catabolic process	2	0.354854	0.663366	0.58988	ncbp2/casc3
GO:0008285	negative regulation of cell proliferation	2	0.354854	0.663366	0.58988	smyd2a/igfbp2b
GO:0097193	intrinsic apoptotic signaling pathway	2	0.354854	0.663366	0.58988	bcl2l1/bcl6a
GO:0033993	response to lipid	5	0.359444	0.668655	0.594582	cxcr4b/pparda/nfe2l2a/nr1d1/rorab
GO:0016485	protein processing	2	0.362246	0.668655	0.594582	cpn1/chac1
GO:0009126	purine nucleoside monophosphate metabolic process	4	0.362431	0.668655	0.594582	pgam1a/impdh1b/pfklb/tpi1b
GO:0009167	purine ribonucleoside monophosphate metabolic process	4	0.362431	0.668655	0.594582	pgam1a/impdh1b/pfklb/tpi1b
GO:0010876	lipid localization	4	0.362431	0.668655	0.594582	apoa4b.3/apoa4b.1/abca1a/si:ch73-233k15.2
GO:0010498	proteasomal protein catabolic process	5	0.363496	0.668655	0.594582	trib3/cdc34b/lonrf1/trib1/sharpin
GO:0006493	protein O-linked glycosylation	1	0.365035	0.668655	0.594582	lfng
GO:0018208	peptidyl-proline modification	1	0.365035	0.668655	0.594582	ppiab
GO:0030278	regulation of ossification	1	0.365035	0.668655	0.594582	enpp1
GO:0032784	regulation of DNA-templated transcription, elongation	1	0.365035	0.668655	0.594582	gtf2f1
GO:0033002	muscle cell proliferation	1	0.365035	0.668655	0.594582	foxo1a
GO:0035690	cellular response to drug	1	0.365035	0.668655	0.594582	ndor1
GO:0035725	sodium ion transmembrane transport	1	0.365035	0.668655	0.594582	slc9a7
GO:0046134	pyrimidine nucleoside biosynthetic process	1	0.365035	0.668655	0.594582	upp1
GO:0048702	embryonic neurocranium morphogenesis	1	0.365035	0.668655	0.594582	ndnf
GO:0072015	glomerular visceral epithelial cell development	1	0.365035	0.668655	0.594582	iqgap2
GO:0072310	glomerular epithelial cell development	1	0.365035	0.668655	0.594582	iqgap2
GO:0000377	RNA splicing, via transesterification reactions with bulged adenosine as nucleophile	4	0.367072	0.670796	0.596486	rbm10/ncbp2/snrpd3/snrpa1
GO:0000398	mRNA splicing, via spliceosome	4	0.367072	0.670796	0.596486	rbm10/ncbp2/snrpd3/snrpa1
GO:0048592	eye morphogenesis	5	0.36755	0.670876	0.596558	odc1/bcl6a/socs1a/epha4a/sharpin
GO:0006956	complement activation	2	0.369605	0.673833	0.599187	cfd/c7b
GO:0000375	RNA splicing, via transesterification reactions	4	0.371712	0.675626	0.600781	rbm10/ncbp2/snrpd3/snrpa1
GO:0030029	actin filament-based process	9	0.376077	0.675626	0.600781	myh7/gsna/eps8a/gmfb/mybpc1/smyd2a/frya/myo18aa/limk1a
GO:0006470	protein dephosphorylation	4	0.376349	0.675626	0.600781	ptpn11b/rpap2/ptpn13/si:ch211-149b19.3
GO:0046486	glycerolipid metabolic process	4	0.376349	0.675626	0.600781	apoa4b.3/apoa4b.1/gk5/lpin1
GO:0001503	ossification	2	0.376932	0.675626	0.600781	enpp1/bmp1a
GO:0008016	regulation of heart contraction	2	0.376932	0.675626	0.600781	adrb2b/flt1
GO:0000387	spliceosomal snRNP assembly	1	0.378018	0.675626	0.600781	snrpd3
GO:0006690	icosanoid metabolic process	1	0.378018	0.675626	0.600781	cyp2k16
GO:0009950	dorsal/ventral axis specification	1	0.378018	0.675626	0.600781	egf
GO:0016525	negative regulation of angiogenesis	1	0.378018	0.675626	0.600781	per2
GO:0030072	peptide hormone secretion	1	0.378018	0.675626	0.600781	gcga
GO:0043123	positive regulation of I-kappaB kinase/NF-kappaB signaling	1	0.378018	0.675626	0.600781	sharpin
GO:0046131	pyrimidine ribonucleoside metabolic process	1	0.378018	0.675626	0.600781	upp1
GO:0048754	branching morphogenesis of an epithelial tube	1	0.378018	0.675626	0.600781	igfbp7
GO:0070286	axonemal dynein complex assembly	1	0.378018	0.675626	0.600781	drc1
GO:0097205	renal filtration	1	0.378018	0.675626	0.600781	iqgap2
GO:0098876	vesicle-mediated transport to the plasma membrane	1	0.378018	0.675626	0.600781	snx17
GO:0048585	negative regulation of response to stimulus	8	0.380151	0.678654	0.603474	bcl2l1/cxcr4b/bcl6a/socs1a/chac1/fbxw7/epha4a/rasal3
GO:0032870	cellular response to hormone stimulus	5	0.383767	0.684318	0.60851	pparda/nfe2l2a/socs1a/nr1d1/rorab
GO:0035051	cardiocyte differentiation	2	0.384223	0.684341	0.608531	myh7/opa1
GO:0030855	epithelial cell differentiation	5	0.38782	0.688802	0.612498	ins/bhmt/gcga/iqgap2/lepr
GO:0031328	positive regulation of cellular biosynthetic process	8	0.389458	0.688802	0.612498	apoa4b.3/ahr1a/tefa/apoa4b.1/gtf2f1/nfe2l2a/tp53bp1/lpin1
GO:0050776	regulation of immune response	4	0.39024	0.688802	0.612498	socs1a/cfd/csk/c7b
GO:0001878	response to yeast	1	0.390737	0.688802	0.612498	limk1a
GO:0006367	transcription initiation from RNA polymerase II promoter	1	0.390737	0.688802	0.612498	gtf2f1
GO:0030223	neutrophil differentiation	1	0.390737	0.688802	0.612498	brf1a
GO:0031532	actin cytoskeleton reorganization	1	0.390737	0.688802	0.612498	frya
GO:0051262	protein tetramerization	1	0.390737	0.688802	0.612498	cbr4
GO:2000181	negative regulation of blood vessel morphogenesis	1	0.390737	0.688802	0.612498	per2
GO:0048915	posterior lateral line system development	2	0.391477	0.689229	0.612877	cxcr4b/anos1a
GO:0051146	striated muscle cell differentiation	5	0.391871	0.689229	0.612877	myh7/opa1/mybpc1/smyd2a/myo18aa
GO:0001525	angiogenesis	7	0.394245	0.69183	0.61519	mt2/per2/igfbp7/flt1/abca1a/narfl/fbxw7
GO:0042127	regulation of cell proliferation	7	0.394245	0.69183	0.61519	fgfr4/bcl6a/smyd2a/csk/ndrg1a/hbegfa/igfbp2b
GO:0009891	positive regulation of biosynthetic process	8	0.395668	0.69354	0.616711	apoa4b.3/ahr1a/tefa/apoa4b.1/gtf2f1/nfe2l2a/tp53bp1/lpin1
GO:0042325	regulation of phosphorylation	7	0.397588	0.696117	0.619002	trib3/gadd45ba/socs1a/inhbab/si:ch211-171h4.3/map2k6/trib1
GO:0000041	transition metal ion transport	2	0.398692	0.696472	0.619318	zgc:198419/hephl1a
GO:0060341	regulation of cellular localization	2	0.398692	0.696472	0.619318	ncbp2/gcga
GO:0006749	glutathione metabolic process	1	0.403196	0.701171	0.623497	chac1
GO:0048024	regulation of mRNA splicing, via spliceosome	1	0.403196	0.701171	0.623497	rbm10
GO:0048857	neural nucleus development	1	0.403196	0.701171	0.623497	cxcr4b
GO:1901343	negative regulation of vasculature development	1	0.403196	0.701171	0.623497	per2
GO:0009101	glycoprotein biosynthetic process	5	0.404011	0.701798	0.624054	lfng/b3gnt5a/itm2bb/st6galnac5b/chst7
GO:0050769	positive regulation of neurogenesis	2	0.405867	0.703443	0.625516	plxnc1/plxnb1b
GO:0090504	epiboly	2	0.405867	0.703443	0.625516	fdx1/rhoca
GO:0042246	tissue regeneration	3	0.407045	0.703906	0.625928	cxcr4b/lfng/hbegfa
GO:0045786	negative regulation of cell cycle	3	0.407045	0.703906	0.625928	cdkn1a/cdc123/tp53bp1
GO:0006839	mitochondrial transport	3	0.412521	0.704178	0.626171	slc25a47a/slc25a1b/slc25a43
GO:0014902	myotube differentiation	2	0.413001	0.704178	0.626171	mybpc1/myo18aa
GO:0018108	peptidyl-tyrosine phosphorylation	2	0.413001	0.704178	0.626171	socs1a/csk
GO:0048881	mechanosensory lateral line system development	2	0.413001	0.704178	0.626171	cxcr4b/anos1a
GO:0043408	regulation of MAPK cascade	4	0.413289	0.704178	0.626171	trib3/gadd45ba/inhbab/trib1
GO:0000154	rRNA modification	1	0.415401	0.704178	0.626171	emg1
GO:0002274	myeloid leukocyte activation	1	0.415401	0.704178	0.626171	ndrg1a
GO:0006171	cAMP biosynthetic process	1	0.415401	0.704178	0.626171	hrh3
GO:0007173	epidermal growth factor receptor signaling pathway	1	0.415401	0.704178	0.626171	hbegfa
GO:0009069	serine family amino acid metabolic process	1	0.415401	0.704178	0.626171	cbsb
GO:0021537	telencephalon development	1	0.415401	0.704178	0.626171	anos1a
GO:0030282	bone mineralization	1	0.415401	0.704178	0.626171	enpp1
GO:0035118	embryonic pectoral fin morphogenesis	1	0.415401	0.704178	0.626171	cul4a
GO:0038127	ERBB signaling pathway	1	0.415401	0.704178	0.626171	hbegfa
GO:0046058	cAMP metabolic process	1	0.415401	0.704178	0.626171	hrh3
GO:0051302	regulation of cell division	1	0.415401	0.704178	0.626171	rab11fip4b
GO:0061138	morphogenesis of a branching epithelium	1	0.415401	0.704178	0.626171	igfbp7
GO:1902036	regulation of hematopoietic stem cell differentiation	1	0.415401	0.704178	0.626171	fgfr4
GO:0050767	regulation of neurogenesis	5	0.416122	0.704628	0.62657	cxcr4b/lfng/plxnc1/plxnb1b/epha4a
GO:0010638	positive regulation of organelle organization	3	0.417982	0.706229	0.627994	gsna/gmfb/limk1a
GO:0043254	regulation of protein complex assembly	3	0.417982	0.706229	0.627994	gsna/eps8a/gmfb
GO:0048066	developmental pigmentation	2	0.420093	0.706626	0.628347	hps5/mycbp2
GO:0072376	protein activation cascade	2	0.420093	0.706626	0.628347	cfd/c7b
GO:0010256	endomembrane system organization	3	0.423425	0.706626	0.628347	mtss1la/myo18aa/ndrg1a
GO:0045597	positive regulation of cell differentiation	3	0.423425	0.706626	0.628347	ins/plxnc1/plxnb1b
GO:0045595	regulation of cell differentiation	9	0.425571	0.706626	0.628347	fgfr4/cxcr4b/lfng/ins/bcl6a/smyd2a/plxnc1/plxnb1b/epha4a
GO:0060218	hematopoietic stem cell differentiation	2	0.42714	0.706626	0.628347	fgfr4/tgfbr2b
GO:0002688	regulation of leukocyte chemotaxis	1	0.427358	0.706626	0.628347	cxcr4b
GO:0003073	regulation of systemic arterial blood pressure	1	0.427358	0.706626	0.628347	adrb2b
GO:0006213	pyrimidine nucleoside metabolic process	1	0.427358	0.706626	0.628347	upp1
GO:0030851	granulocyte differentiation	1	0.427358	0.706626	0.628347	brf1a
GO:0034332	adherens junction organization	1	0.427358	0.706626	0.628347	csk
GO:0034341	response to interferon-gamma	1	0.427358	0.706626	0.628347	socs1a
GO:0042168	heme metabolic process	1	0.427358	0.706626	0.628347	hmox1a
GO:0061318	renal filtration cell differentiation	1	0.427358	0.706626	0.628347	iqgap2
GO:0070192	chromosome organization involved in meiotic cell cycle	1	0.427358	0.706626	0.628347	syce2
GO:0071346	cellular response to interferon-gamma	1	0.427358	0.706626	0.628347	socs1a
GO:0072010	glomerular epithelium development	1	0.427358	0.706626	0.628347	iqgap2
GO:0072112	glomerular visceral epithelial cell differentiation	1	0.427358	0.706626	0.628347	iqgap2
GO:0072311	glomerular epithelial cell differentiation	1	0.427358	0.706626	0.628347	iqgap2
GO:0072332	intrinsic apoptotic signaling pathway by p53 class mediator	1	0.427358	0.706626	0.628347	bcl6a
GO:0051347	positive regulation of transferase activity	3	0.428852	0.707582	0.629198	gadd45ba/si:ch211-171h4.3/map2k6
GO:1901605	alpha-amino acid metabolic process	3	0.428852	0.707582	0.629198	odc1/cbsb/bhmt
GO:0048839	inner ear development	4	0.431594	0.711348	0.632546	slc9a3r1a/cul4a/lepr/sharpin
GO:0008284	positive regulation of cell proliferation	2	0.434143	0.71258	0.633642	fgfr4/hbegfa
GO:0018212	peptidyl-tyrosine modification	2	0.434143	0.71258	0.633642	socs1a/csk
GO:0043207	response to external biotic stimulus	6	0.435472	0.71258	0.633642	cxcr4b/atf3/cpt1b/pglyrp2/lyz/limk1a
GO:0051707	response to other organism	6	0.435472	0.71258	0.633642	cxcr4b/atf3/cpt1b/pglyrp2/lyz/limk1a
GO:0016311	dephosphorylation	5	0.436217	0.71258	0.633642	ptpn11b/rpap2/plpp3/ptpn13/si:ch211-149b19.3
GO:0000245	spliceosomal complex assembly	1	0.43907	0.71258	0.633642	snrpd3
GO:0000266	mitochondrial fission	1	0.43907	0.71258	0.633642	opa1
GO:0006220	pyrimidine nucleotide metabolic process	1	0.43907	0.71258	0.633642	upp1
GO:0006221	pyrimidine nucleotide biosynthetic process	1	0.43907	0.71258	0.633642	upp1
GO:0006284	base-excision repair	1	0.43907	0.71258	0.633642	neil1
GO:0006766	vitamin metabolic process	1	0.43907	0.71258	0.633642	mmadhc
GO:0016073	snRNA metabolic process	1	0.43907	0.71258	0.633642	rpap2
GO:0048010	vascular endothelial growth factor receptor signaling pathway	1	0.43907	0.71258	0.633642	flt1
GO:2000736	regulation of stem cell differentiation	1	0.43907	0.71258	0.633642	fgfr4
GO:0008154	actin polymerization or depolymerization	3	0.439649	0.71258	0.633642	gsna/eps8a/gmfb
GO:0043583	ear development	4	0.440691	0.71258	0.633642	slc9a3r1a/cul4a/lepr/sharpin
GO:0051270	regulation of cellular component movement	4	0.440691	0.71258	0.633642	mt2/cxcr4b/sst1.1/arrb2b
GO:0061025	membrane fusion	4	0.440691	0.71258	0.633642	doc2d/vamp5/napab/opa1
GO:0051962	positive regulation of nervous system development	2	0.441099	0.71258	0.633642	plxnc1/plxnb1b
GO:0002253	activation of immune response	3	0.445019	0.716666	0.637275	cfd/csk/c7b
GO:0022411	cellular component disassembly	3	0.445019	0.716666	0.637275	gsna/napab/eps8a
GO:0046034	ATP metabolic process	3	0.445019	0.716666	0.637275	pgam1a/pfklb/tpi1b
GO:0032270	positive regulation of cellular protein metabolic process	7	0.4476	0.719567	0.639854	trib3/gadd45ba/inhbab/lonrf1/si:ch211-171h4.3/map2k6/trib1
GO:0006778	porphyrin-containing compound metabolic process	1	0.450544	0.719567	0.639854	hmox1a
GO:0008630	intrinsic apoptotic signaling pathway in response to DNA damage	1	0.450544	0.719567	0.639854	bcl2l1
GO:0009620	response to fungus	1	0.450544	0.719567	0.639854	limk1a
GO:0034314	Arp2/3 complex-mediated actin nucleation	1	0.450544	0.719567	0.639854	gmfb
GO:0043534	blood vessel endothelial cell migration	1	0.450544	0.719567	0.639854	mt2
GO:0046883	regulation of hormone secretion	1	0.450544	0.719567	0.639854	gcga
GO:0071229	cellular response to acid chemical	1	0.450544	0.719567	0.639854	nfe2l2a
GO:0002682	regulation of immune system process	6	0.453516	0.721857	0.641891	fgfr4/cxcr4b/socs1a/cfd/csk/c7b
GO:0007409	axonogenesis	7	0.454225	0.721857	0.641891	cxcr4b/anos1a/mycbp2/plxnc1/dagla/plxnb1b/epha4a
GO:0040012	regulation of locomotion	4	0.454254	0.721857	0.641891	mt2/cxcr4b/sst1.1/arrb2b
GO:0010720	positive regulation of cell development	2	0.454869	0.721857	0.641891	plxnc1/plxnb1b
GO:0016197	endosomal transport	2	0.454869	0.721857	0.641891	rab7/snx17
GO:0031334	positive regulation of protein complex assembly	2	0.454869	0.721857	0.641891	gsna/gmfb
GO:0006457	protein folding	3	0.455697	0.721857	0.641891	ppiab/dnaja3a/fkbp11
GO:0090596	sensory organ morphogenesis	6	0.460698	0.721857	0.641891	odc1/bcl6a/cul4a/socs1a/epha4a/sharpin
GO:0006959	humoral immune response	2	0.461681	0.721857	0.641891	cfd/c7b
GO:0048747	muscle fiber development	2	0.461681	0.721857	0.641891	mybpc1/myo18aa
GO:0050657	nucleic acid transport	2	0.461681	0.721857	0.641891	ncbp2/casc3
GO:0050658	RNA transport	2	0.461681	0.721857	0.641891	ncbp2/casc3
GO:1901617	organic hydroxy compound biosynthetic process	2	0.461681	0.721857	0.641891	apoa4b.3/apoa4b.1
GO:0003014	renal system process	1	0.461783	0.721857	0.641891	iqgap2
GO:0006289	nucleotide-excision repair	1	0.461783	0.721857	0.641891	neil1
GO:0006986	response to unfolded protein	1	0.461783	0.721857	0.641891	chac1
GO:0009895	negative regulation of catabolic process	1	0.461783	0.721857	0.641891	timp2a
GO:0030166	proteoglycan biosynthetic process	1	0.461783	0.721857	0.641891	chst7
GO:0031330	negative regulation of cellular catabolic process	1	0.461783	0.721857	0.641891	timp2a
GO:0032386	regulation of intracellular transport	1	0.461783	0.721857	0.641891	ncbp2
GO:0043122	regulation of I-kappaB kinase/NF-kappaB signaling	1	0.461783	0.721857	0.641891	sharpin
GO:0051094	positive regulation of developmental process	4	0.463237	0.723398	0.643261	mt2/ins/plxnc1/plxnb1b
GO:0051247	positive regulation of protein metabolic process	7	0.467428	0.727852	0.647222	trib3/gadd45ba/inhbab/lonrf1/si:ch211-171h4.3/map2k6/trib1
GO:0007167	enzyme linked receptor protein signaling pathway	10	0.468218	0.727852	0.647222	fgfr4/tgfbr2b/socs1a/flt1/inhbab/csk/epha4a/epha3/hbegfa/igfbp2b
GO:0042472	inner ear morphogenesis	2	0.468443	0.727852	0.647222	cul4a/sharpin
GO:0045765	regulation of angiogenesis	2	0.468443	0.727852	0.647222	mt2/per2
GO:0051236	establishment of RNA localization	2	0.468443	0.727852	0.647222	ncbp2/casc3
GO:0001763	morphogenesis of a branching structure	1	0.472794	0.730209	0.649317	igfbp7
GO:0032103	positive regulation of response to external stimulus	1	0.472794	0.730209	0.649317	cxcr4b
GO:0032402	melanosome transport	1	0.472794	0.730209	0.649317	zgc:91968
GO:0035138	pectoral fin morphogenesis	1	0.472794	0.730209	0.649317	cul4a
GO:0045766	positive regulation of angiogenesis	1	0.472794	0.730209	0.649317	mt2
GO:0051904	pigment granule transport	1	0.472794	0.730209	0.649317	zgc:91968
GO:0042471	ear morphogenesis	2	0.475154	0.733122	0.651908	cul4a/sharpin
GO:0032990	cell part morphogenesis	8	0.476044	0.733762	0.652478	cxcr4b/anos1a/mycbp2/opa1/plxnc1/dagla/plxnb1b/epha4a
GO:0000165	MAPK cascade	4	0.476612	0.733907	0.652606	trib3/gadd45ba/inhbab/trib1
GO:0023014	signal transduction by protein phosphorylation	4	0.481043	0.736565	0.65497	trib3/gadd45ba/inhbab/trib1
GO:0030155	regulation of cell adhesion	2	0.481814	0.736565	0.65497	plxnc1/plxnb1b
GO:0050778	positive regulation of immune response	3	0.482001	0.736565	0.65497	cfd/csk/c7b
GO:0006368	transcription elongation from RNA polymerase II promoter	1	0.483579	0.736565	0.65497	gtf2f1
GO:0008286	insulin receptor signaling pathway	1	0.483579	0.736565	0.65497	socs1a
GO:0009066	aspartate family amino acid metabolic process	1	0.483579	0.736565	0.65497	bhmt
GO:0010212	response to ionizing radiation	1	0.483579	0.736565	0.65497	cdkn1a
GO:0018279	protein N-linked glycosylation via asparagine	1	0.483579	0.736565	0.65497	st6galnac5b
GO:0032401	establishment of melanosome localization	1	0.483579	0.736565	0.65497	zgc:91968
GO:0072528	pyrimidine-containing compound biosynthetic process	1	0.483579	0.736565	0.65497	upp1
GO:1901532	regulation of hematopoietic progenitor cell differentiation	1	0.483579	0.736565	0.65497	fgfr4
GO:0048732	gland development	5	0.487636	0.742013	0.659814	bcl2l1/fads2/cpn1/ppdpfa/trib1
GO:0009607	response to biotic stimulus	6	0.492703	0.746043	0.663398	cxcr4b/atf3/cpt1b/pglyrp2/lyz/limk1a
GO:0000462	maturation of SSU-rRNA from tricistronic rRNA transcript (SSU-rRNA, 5.8S rRNA, LSU-rRNA)	1	0.494145	0.746043	0.663398	emg1
GO:0002685	regulation of leukocyte migration	1	0.494145	0.746043	0.663398	cxcr4b
GO:0006029	proteoglycan metabolic process	1	0.494145	0.746043	0.663398	chst7
GO:0008589	regulation of smoothened signaling pathway	1	0.494145	0.746043	0.663398	arrb2b
GO:0018196	peptidyl-asparagine modification	1	0.494145	0.746043	0.663398	st6galnac5b
GO:0035113	embryonic appendage morphogenesis	1	0.494145	0.746043	0.663398	cul4a
GO:0051651	maintenance of location in cell	1	0.494145	0.746043	0.663398	zgc:198419
GO:0043062	extracellular structure organization	2	0.494976	0.746491	0.663796	apoa4b.3/apoa4b.1
GO:0009100	glycoprotein metabolic process	5	0.495407	0.746491	0.663796	lfng/b3gnt5a/itm2bb/st6galnac5b/chst7
GO:0001889	liver development	3	0.497493	0.748176	0.665294	fads2/cpn1/trib1
GO:0043473	pigmentation	3	0.497493	0.748176	0.665294	hps5/mycbp2/zgc:91968
GO:0042692	muscle cell differentiation	5	0.499277	0.749951	0.666873	myh7/opa1/mybpc1/smyd2a/myo18aa
GO:0060560	developmental growth involved in morphogenesis	3	0.502606	0.749951	0.666873	cxcr4b/plxnb1b/epha4a
GO:0006354	DNA-templated transcription, elongation	1	0.504495	0.749951	0.666873	gtf2f1
GO:0006730	one-carbon metabolic process	1	0.504495	0.749951	0.666873	fpgs
GO:0032400	melanosome localization	1	0.504495	0.749951	0.666873	zgc:91968
GO:0043281	regulation of cysteine-type endopeptidase activity involved in apoptotic process	1	0.504495	0.749951	0.666873	bcl2l1
GO:0046879	hormone secretion	1	0.504495	0.749951	0.666873	gcga
GO:0048262	determination of dorsal/ventral asymmetry	1	0.504495	0.749951	0.666873	bmp1a
GO:0051668	localization within membrane	1	0.504495	0.749951	0.666873	slc9a3r1a
GO:0061077	chaperone-mediated protein folding	1	0.504495	0.749951	0.666873	fkbp11
GO:0098732	macromolecule deacylation	1	0.504495	0.749951	0.666873	hdac10
GO:1904018	positive regulation of vasculature development	1	0.504495	0.749951	0.666873	mt2
GO:0001654	eye development	8	0.506384	0.752037	0.668727	odc1/rab18a/bcl6a/socs1a/lepr/epha4a/sharpin/hbegfa
GO:0044093	positive regulation of molecular function	7	0.509754	0.756314	0.672531	apoa4b.3/myo9aa/apoa4b.1/gadd45ba/myo9b/si:ch211-171h4.3/map2k6
GO:0006875	cellular metal ion homeostasis	4	0.511624	0.757737	0.673797	zgc:198419/tac4/hephl1a/aco1
GO:0006403	RNA localization	2	0.514317	0.757737	0.673797	ncbp2/casc3
GO:0006939	smooth muscle contraction	1	0.514634	0.757737	0.673797	adrb2b
GO:0030336	negative regulation of cell migration	1	0.514634	0.757737	0.673797	cxcr4b
GO:0035850	epithelial cell differentiation involved in kidney development	1	0.514634	0.757737	0.673797	iqgap2
GO:0051905	establishment of pigment granule localization	1	0.514634	0.757737	0.673797	zgc:91968
GO:0061351	neural precursor cell proliferation	1	0.514634	0.757737	0.673797	cetn4
GO:1905330	regulation of morphogenesis of an epithelium	1	0.514634	0.757737	0.673797	fdx1
GO:0009617	response to bacterium	4	0.520212	0.757924	0.673963	cxcr4b/cpt1b/pglyrp2/lyz
GO:0002011	morphogenesis of an epithelial sheet	2	0.520654	0.757924	0.673963	fdx1/rhoca
GO:0048738	cardiac muscle tissue development	2	0.520654	0.757924	0.673963	myh7/opa1
GO:0051604	protein maturation	2	0.520654	0.757924	0.673963	cpn1/chac1
GO:1901342	regulation of vasculature development	2	0.520654	0.757924	0.673963	mt2/per2
GO:0000077	DNA damage checkpoint	1	0.524566	0.757924	0.673963	tp53bp1
GO:0000910	cytokinesis	1	0.524566	0.757924	0.673963	rab11fip4b
GO:0001510	RNA methylation	1	0.524566	0.757924	0.673963	emg1
GO:0002791	regulation of peptide secretion	1	0.524566	0.757924	0.673963	gcga
GO:0007157	heterophilic cell-cell adhesion via plasma membrane cell adhesion molecules	1	0.524566	0.757924	0.673963	si:dkey-237h12.3
GO:0009914	hormone transport	1	0.524566	0.757924	0.673963	gcga
GO:0010470	regulation of gastrulation	1	0.524566	0.757924	0.673963	fdx1
GO:0043542	endothelial cell migration	1	0.524566	0.757924	0.673963	mt2
GO:0048791	calcium ion-regulated exocytosis of neurotransmitter	1	0.524566	0.757924	0.673963	doc2d
GO:0050684	regulation of mRNA processing	1	0.524566	0.757924	0.673963	rbm10
GO:0050708	regulation of protein secretion	1	0.524566	0.757924	0.673963	gcga
GO:0061005	cell differentiation involved in kidney development	1	0.524566	0.757924	0.673963	iqgap2
GO:1901568	fatty acid derivative metabolic process	1	0.524566	0.757924	0.673963	cyp2k16
GO:2000146	negative regulation of cell motility	1	0.524566	0.757924	0.673963	cxcr4b
GO:2001020	regulation of response to DNA damage stimulus	1	0.524566	0.757924	0.673963	smyd2a
GO:0048667	cell morphogenesis involved in neuron differentiation	7	0.525735	0.758904	0.674834	cxcr4b/anos1a/mycbp2/plxnc1/dagla/plxnb1b/epha4a
GO:0035162	embryonic hemopoiesis	2	0.526937	0.759929	0.675746	socs1a/numb
GO:0048589	developmental growth	6	0.527503	0.760037	0.675841	cxcr4b/lfng/plxnb1b/epha4a/hbegfa/igfbp2b
GO:0016071	mRNA metabolic process	7	0.532073	0.760609	0.67635	rbm10/ncbp2/casc3/snrpd3/gpatch1/snrpa1/esrp2
GO:0006605	protein targeting	2	0.533163	0.760609	0.67635	slc9a3r1a/ssr1
GO:0080135	regulation of cellular response to stress	2	0.533163	0.760609	0.67635	smyd2a/epha4a
GO:1903522	regulation of blood circulation	2	0.533163	0.760609	0.67635	adrb2b/flt1
GO:0007030	Golgi organization	1	0.534296	0.760609	0.67635	myo18aa
GO:0007631	feeding behavior	1	0.534296	0.760609	0.67635	ins
GO:0033500	carbohydrate homeostasis	1	0.534296	0.760609	0.67635	gcga
GO:0034329	cell junction assembly	1	0.534296	0.760609	0.67635	ptpn13
GO:0040013	negative regulation of locomotion	1	0.534296	0.760609	0.67635	cxcr4b
GO:0042593	glucose homeostasis	1	0.534296	0.760609	0.67635	gcga
GO:0048596	embryonic camera-type eye morphogenesis	1	0.534296	0.760609	0.67635	epha4a
GO:0051271	negative regulation of cellular component movement	1	0.534296	0.760609	0.67635	cxcr4b
GO:0072527	pyrimidine-containing compound metabolic process	1	0.534296	0.760609	0.67635	upp1
GO:0006952	defense response	8	0.539105	0.765665	0.680846	tac4/cxcr4b/bcl6a/socs1a/cfd/csk/pglyrp2/lyz
GO:0000209	protein polyubiquitination	2	0.539333	0.765665	0.680846	lonrf1/sharpin
GO:0045596	negative regulation of cell differentiation	2	0.539333	0.765665	0.680846	lfng/epha4a
GO:0001764	neuron migration	1	0.543826	0.768515	0.68338	cxcr4b
GO:0006637	acyl-CoA metabolic process	1	0.543826	0.768515	0.68338	acot17
GO:0035383	thioester metabolic process	1	0.543826	0.768515	0.68338	acot17
GO:0051875	pigment granule localization	1	0.543826	0.768515	0.68338	zgc:91968
GO:0060840	artery development	1	0.543826	0.768515	0.68338	cdkn1a
GO:0006520	cellular amino acid metabolic process	4	0.545537	0.770229	0.684905	odc1/cbsb/bhmt/acy1
GO:0045893	positive regulation of transcription, DNA-templated	6	0.547915	0.771472	0.686009	ahr1a/tefa/gtf2f1/nfe2l2a/tp53bp1/lpin1
GO:1902680	positive regulation of RNA biosynthetic process	6	0.547915	0.771472	0.686009	ahr1a/tefa/gtf2f1/nfe2l2a/tp53bp1/lpin1
GO:1903508	positive regulation of nucleic acid-templated transcription	6	0.547915	0.771472	0.686009	ahr1a/tefa/gtf2f1/nfe2l2a/tp53bp1/lpin1
GO:0015931	nucleobase-containing compound transport	2	0.551504	0.771832	0.68633	ncbp2/casc3
GO:0007189	adenylate cyclase-activating G-protein coupled receptor signaling pathway	1	0.553163	0.771832	0.68633	adrb2b
GO:0010862	positive regulation of pathway-restricted SMAD protein phosphorylation	1	0.553163	0.771832	0.68633	inhbab
GO:0018022	peptidyl-lysine methylation	1	0.553163	0.771832	0.68633	smyd2a
GO:0030148	sphingolipid biosynthetic process	1	0.553163	0.771832	0.68633	hacd1
GO:0031570	DNA integrity checkpoint	1	0.553163	0.771832	0.68633	tp53bp1
GO:0035966	response to topologically incorrect protein	1	0.553163	0.771832	0.68633	chac1
GO:0043406	positive regulation of MAP kinase activity	1	0.553163	0.771832	0.68633	gadd45ba
GO:1902115	regulation of organelle assembly	1	0.553163	0.771832	0.68633	smyd2a
GO:2000116	regulation of cysteine-type endopeptidase activity	1	0.553163	0.771832	0.68633	bcl2l1
GO:0048284	organelle fusion	3	0.556989	0.775743	0.689808	doc2d/vamp5/opa1
GO:0031098	stress-activated protein kinase signaling cascade	2	0.557505	0.775743	0.689808	si:ch211-171h4.3/map2k6
GO:0048882	lateral line development	2	0.557505	0.775743	0.689808	cxcr4b/anos1a
GO:0009968	negative regulation of signal transduction	6	0.557973	0.775743	0.689808	bcl2l1/bcl6a/socs1a/chac1/fbxw7/rasal3
GO:0051240	positive regulation of multicellular organismal process	4	0.562033	0.776187	0.690202	mt2/ins/plxnc1/plxnb1b
GO:0009311	oligosaccharide metabolic process	1	0.562309	0.776187	0.690202	st6galnac5b
GO:0017158	regulation of calcium ion-dependent exocytosis	1	0.562309	0.776187	0.690202	doc2d
GO:0032869	cellular response to insulin stimulus	1	0.562309	0.776187	0.690202	socs1a
GO:0034754	cellular hormone metabolic process	1	0.562309	0.776187	0.690202	hsd17b12a
GO:0042440	pigment metabolic process	1	0.562309	0.776187	0.690202	hmox1a
GO:0045132	meiotic chromosome segregation	1	0.562309	0.776187	0.690202	syce2
GO:0060393	regulation of pathway-restricted SMAD protein phosphorylation	1	0.562309	0.776187	0.690202	inhbab
GO:0006402	mRNA catabolic process	2	0.563448	0.777065	0.690983	ncbp2/casc3
GO:0006644	phospholipid metabolic process	4	0.566106	0.780035	0.693624	apoa4b.3/apoa4b.1/chpt1/plpp3
GO:0042060	wound healing	4	0.570158	0.780195	0.693766	cxcr4b/lfng/rhoca/hbegfa
GO:0045944	positive regulation of transcription by RNA polymerase II	4	0.570158	0.780195	0.693766	ahr1a/gtf2f1/tp53bp1/lpin1
GO:0006937	regulation of muscle contraction	1	0.571268	0.780195	0.693766	adrb2b
GO:0007249	I-kappaB kinase/NF-kappaB signaling	1	0.571268	0.780195	0.693766	sharpin
GO:0042462	eye photoreceptor cell development	1	0.571268	0.780195	0.693766	odc1
GO:0046426	negative regulation of JAK-STAT cascade	1	0.571268	0.780195	0.693766	socs1a
GO:0046839	phospholipid dephosphorylation	1	0.571268	0.780195	0.693766	plpp3
GO:0060389	pathway-restricted SMAD protein phosphorylation	1	0.571268	0.780195	0.693766	inhbab
GO:0060395	SMAD protein signal transduction	1	0.571268	0.780195	0.693766	inhbab
GO:1904893	negative regulation of STAT cascade	1	0.571268	0.780195	0.693766	socs1a
GO:0031399	regulation of protein modification process	7	0.575453	0.785216	0.698232	trib3/gadd45ba/socs1a/inhbab/si:ch211-171h4.3/map2k6/trib1
GO:0001101	response to acid chemical	1	0.580044	0.786446	0.699325	nfe2l2a
GO:0001894	tissue homeostasis	1	0.580044	0.786446	0.699325	bcl2l1
GO:0031017	exocrine pancreas development	1	0.580044	0.786446	0.699325	ppdpfa
GO:0032868	response to insulin	1	0.580044	0.786446	0.699325	socs1a
GO:0035272	exocrine system development	1	0.580044	0.786446	0.699325	ppdpfa
GO:0052652	cyclic purine nucleotide metabolic process	1	0.580044	0.786446	0.699325	hrh3
GO:0009953	dorsal/ventral pattern formation	3	0.580505	0.786446	0.699325	egf/stk36/bmp1a
GO:0009451	RNA modification	2	0.580932	0.786446	0.699325	pus7l/emg1
GO:0072657	protein localization to membrane	2	0.580932	0.786446	0.699325	slc9a3r1a/ssr1
GO:0010648	negative regulation of cell communication	6	0.584273	0.789586	0.702117	bcl2l1/bcl6a/socs1a/chac1/fbxw7/rasal3
GO:0023057	negative regulation of signaling	6	0.584273	0.789586	0.702117	bcl2l1/bcl6a/socs1a/chac1/fbxw7/rasal3
GO:0061053	somite development	3	0.585113	0.789965	0.702454	gadd45ba/epha4a/epha3
GO:0001934	positive regulation of protein phosphorylation	4	0.586154	0.789965	0.702454	gadd45ba/inhbab/si:ch211-171h4.3/map2k6
GO:0007127	meiosis I	1	0.588641	0.789965	0.702454	syce2
GO:0009190	cyclic nucleotide biosynthetic process	1	0.588641	0.789965	0.702454	hrh3
GO:0019933	cAMP-mediated signaling	1	0.588641	0.789965	0.702454	adrb2b
GO:0019935	cyclic-nucleotide-mediated signaling	1	0.588641	0.789965	0.702454	adrb2b
GO:0045088	regulation of innate immune response	1	0.588641	0.789965	0.702454	socs1a
GO:0090257	regulation of muscle system process	1	0.588641	0.789965	0.702454	adrb2b
GO:0010243	response to organonitrogen compound	3	0.594232	0.796086	0.707897	socs1a/cpt1b/fasn
GO:0048593	camera-type eye morphogenesis	3	0.594232	0.796086	0.707897	bcl6a/socs1a/epha4a
GO:0018107	peptidyl-threonine phosphorylation	1	0.597063	0.796167	0.707969	camk1ga
GO:0018210	peptidyl-threonine modification	1	0.597063	0.796167	0.707969	camk1ga
GO:0030490	maturation of SSU-rRNA	1	0.597063	0.796167	0.707969	emg1
GO:0071375	cellular response to peptide hormone stimulus	1	0.597063	0.796167	0.707969	socs1a
GO:1901653	cellular response to peptide	1	0.597063	0.796167	0.707969	socs1a
GO:0042742	defense response to bacterium	2	0.597898	0.796167	0.707969	pglyrp2/lyz
GO:0043547	positive regulation of GTPase activity	2	0.597898	0.796167	0.707969	myo9aa/myo9b
GO:0042327	positive regulation of phosphorylation	4	0.6018	0.800007	0.711383	gadd45ba/inhbab/si:ch211-171h4.3/map2k6
GO:0018193	peptidyl-amino acid modification	8	0.601816	0.800007	0.711383	ppiab/camk1ga/st6galnac5b/socs1a/smyd2a/prkcq/csk/unm_hu7910
GO:0002521	leukocyte differentiation	2	0.603437	0.800525	0.711844	casp8l1/brf1a
GO:0001707	mesoderm formation	1	0.605313	0.800525	0.711844	epha3
GO:0007179	transforming growth factor beta receptor signaling pathway	1	0.605313	0.800525	0.711844	tgfbr2b
GO:0061982	meiosis I cell cycle process	1	0.605313	0.800525	0.711844	syce2
GO:0071559	response to transforming growth factor beta	1	0.605313	0.800525	0.711844	tgfbr2b
GO:0071560	cellular response to transforming growth factor beta stimulus	1	0.605313	0.800525	0.711844	tgfbr2b
GO:0048812	neuron projection morphogenesis	7	0.608162	0.802919	0.713973	cxcr4b/anos1a/mycbp2/plxnc1/dagla/plxnb1b/epha4a
GO:0120039	plasma membrane bounded cell projection morphogenesis	7	0.608162	0.802919	0.713973	cxcr4b/anos1a/mycbp2/plxnc1/dagla/plxnb1b/epha4a
GO:0048858	cell projection morphogenesis	7	0.611069	0.805699	0.716445	cxcr4b/anos1a/mycbp2/plxnc1/dagla/plxnb1b/epha4a
GO:0010631	epithelial cell migration	1	0.613394	0.805699	0.716445	mt2
GO:0021591	ventricular system development	1	0.613394	0.805699	0.716445	slc9a3r1a
GO:0021782	glial cell development	1	0.613394	0.805699	0.716445	ndrg1a
GO:0072009	nephron epithelium development	1	0.613394	0.805699	0.716445	iqgap2
GO:1903305	regulation of regulated secretory pathway	1	0.613394	0.805699	0.716445	doc2d
GO:0051254	positive regulation of RNA metabolic process	6	0.61909	0.809904	0.720184	ahr1a/tefa/gtf2f1/nfe2l2a/tp53bp1/lpin1
GO:0048880	sensory system development	2	0.61971	0.809904	0.720184	cxcr4b/anos1a
GO:0048925	lateral line system development	2	0.61971	0.809904	0.720184	cxcr4b/anos1a
GO:0060042	retina morphogenesis in camera-type eye	2	0.61971	0.809904	0.720184	bcl6a/socs1a
GO:0048701	embryonic cranial skeleton morphogenesis	3	0.6208	0.809904	0.720184	ptpn11b/ndnf/sharpin
GO:0031076	embryonic camera-type eye development	1	0.621311	0.809904	0.720184	epha4a
GO:0043434	response to peptide hormone	1	0.621311	0.809904	0.720184	socs1a
GO:0048048	embryonic eye morphogenesis	1	0.621311	0.809904	0.720184	epha4a
GO:1990542	mitochondrial transmembrane transport	1	0.621311	0.809904	0.720184	slc25a1b
GO:0001568	blood vessel development	8	0.62354	0.812126	0.72216	cdkn1a/mt2/per2/igfbp7/flt1/abca1a/narfl/fbxw7
GO:0001756	somitogenesis	2	0.625019	0.812538	0.722526	gadd45ba/epha3
GO:0023061	signal release	2	0.625019	0.812538	0.722526	doc2d/gcga
GO:0000904	cell morphogenesis involved in differentiation	7	0.625433	0.812538	0.722526	cxcr4b/anos1a/mycbp2/plxnc1/dagla/plxnb1b/epha4a
GO:0038083	peptidyl-tyrosine autophosphorylation	1	0.629065	0.81657	0.726112	csk
GO:1903530	regulation of secretion by cell	2	0.63027	0.817448	0.726893	doc2d/gcga
GO:0010557	positive regulation of macromolecule biosynthetic process	6	0.631336	0.818144	0.727511	ahr1a/tefa/gtf2f1/nfe2l2a/tp53bp1/lpin1
GO:0007411	axon guidance	3	0.633634	0.820433	0.729547	cxcr4b/anos1a/mycbp2
GO:0016567	protein ubiquitination	5	0.635916	0.821666	0.730643	hectd1/ddb2/socs1a/lonrf1/sharpin
GO:0030593	neutrophil chemotaxis	1	0.636662	0.821666	0.730643	cxcr4b
GO:0032006	regulation of TOR signaling	1	0.636662	0.821666	0.730643	fbxw7
GO:0048514	blood vessel morphogenesis	7	0.636711	0.821666	0.730643	mt2/per2/igfbp7/flt1/abca1a/narfl/fbxw7
GO:0048704	embryonic skeletal system morphogenesis	3	0.637844	0.821756	0.730723	ptpn11b/ndnf/sharpin
GO:0097485	neuron projection guidance	3	0.637844	0.821756	0.730723	cxcr4b/anos1a/mycbp2
GO:0000902	cell morphogenesis	9	0.63985	0.823653	0.73241	cxcr4b/anos1a/mycbp2/plxnc1/frya/si:dkey-237h12.3/dagla/plxnb1b/epha4a
GO:0006401	RNA catabolic process	2	0.640602	0.823935	0.732661	ncbp2/casc3
GO:0010562	positive regulation of phosphorus metabolic process	4	0.642943	0.825573	0.734118	gadd45ba/inhbab/si:ch211-171h4.3/map2k6
GO:0045937	positive regulation of phosphate metabolic process	4	0.642943	0.825573	0.734118	gadd45ba/inhbab/si:ch211-171h4.3/map2k6
GO:0001570	vasculogenesis	1	0.644103	0.825691	0.734222	flt1
GO:0090132	epithelium migration	1	0.644103	0.825691	0.734222	mt2
GO:0065004	protein-DNA complex assembly	2	0.645681	0.827029	0.735412	brf1a/hist2h2l
GO:0046425	regulation of JAK-STAT cascade	1	0.651392	0.832275	0.740077	socs1a
GO:0055113	epiboly involved in gastrulation with mouth forming second	1	0.651392	0.832275	0.740077	fdx1
GO:1904892	regulation of STAT cascade	1	0.651392	0.832275	0.740077	socs1a
GO:0002684	positive regulation of immune system process	3	0.654347	0.834501	0.742057	cfd/csk/c7b
GO:0009719	response to endogenous stimulus	8	0.657448	0.834501	0.742057	fgfr4/tgfbr2b/pparda/timp2a/nfe2l2a/socs1a/nr1d1/rorab
GO:0006091	generation of precursor metabolites and energy	3	0.658387	0.834501	0.742057	pgam1a/pfklb/tpi1b
GO:0002790	peptide secretion	1	0.658533	0.834501	0.742057	gcga
GO:0009306	protein secretion	1	0.658533	0.834501	0.742057	gcga
GO:0033059	cellular pigmentation	1	0.658533	0.834501	0.742057	zgc:91968
GO:0051223	regulation of protein transport	1	0.658533	0.834501	0.742057	gcga
GO:0070201	regulation of establishment of protein localization	1	0.658533	0.834501	0.742057	gcga
GO:0071621	granulocyte chemotaxis	1	0.658533	0.834501	0.742057	cxcr4b
GO:0090087	regulation of peptide transport	1	0.658533	0.834501	0.742057	gcga
GO:0043414	macromolecule methylation	2	0.660581	0.835727	0.743147	smyd2a/emg1
GO:0051046	regulation of secretion	2	0.660581	0.835727	0.743147	doc2d/gcga
GO:0000122	negative regulation of transcription by RNA polymerase II	2	0.665435	0.838554	0.74566	smyd2a/cited4a
GO:0002244	hematopoietic progenitor cell differentiation	2	0.665435	0.838554	0.74566	fgfr4/tgfbr2b
GO:0007188	adenylate cyclase-modulating G-protein coupled receptor signaling pathway	2	0.665435	0.838554	0.74566	adrb2b/gcga
GO:0042391	regulation of membrane potential	2	0.665435	0.838554	0.74566	slc26a6/slc26a3.1
GO:0048332	mesoderm morphogenesis	1	0.665527	0.838554	0.74566	epha3
GO:0001944	vasculature development	9	0.668836	0.842037	0.748757	cdkn1a/mt2/per2/igfbp7/flt1/abca1a/narfl/fbxw7/foxo1a
GO:0006941	striated muscle contraction	1	0.672379	0.844434	0.750889	mybpc1
GO:0030335	positive regulation of cell migration	1	0.672379	0.844434	0.750889	mt2
GO:0032835	glomerulus development	1	0.672379	0.844434	0.750889	iqgap2
GO:0006954	inflammatory response	3	0.67421	0.846046	0.752322	tac4/cxcr4b/bcl6a
GO:0006412	translation	9	0.678188	0.850101	0.755928	ncbp2/eif5/eif2s2/brf1a/cdc123/casc3/rwdd1/eif4e2/trnau1apa
GO:0031929	TOR signaling	1	0.679091	0.850101	0.755928	fbxw7
GO:2000147	positive regulation of cell motility	1	0.679091	0.850101	0.755928	mt2
GO:0017144	drug metabolic process	5	0.680091	0.850664	0.756429	pgam1a/mmadhc/pfklb/tpi1b/amd1
GO:0034248	regulation of cellular amide metabolic process	4	0.681208	0.850833	0.75658	ncbp2/pgam1a/cdc123/casc3
GO:0006936	muscle contraction	2	0.684293	0.850833	0.75658	adrb2b/mybpc1
GO:0006405	RNA export from nucleus	1	0.685666	0.850833	0.75658	ncbp2
GO:0008543	fibroblast growth factor receptor signaling pathway	1	0.685666	0.850833	0.75658	fgfr4
GO:0044344	cellular response to fibroblast growth factor stimulus	1	0.685666	0.850833	0.75658	fgfr4
GO:0051272	positive regulation of cellular component movement	1	0.685666	0.850833	0.75658	mt2
GO:0071774	response to fibroblast growth factor	1	0.685666	0.850833	0.75658	fgfr4
GO:0071902	positive regulation of protein serine/threonine kinase activity	1	0.685666	0.850833	0.75658	gadd45ba
GO:1990266	neutrophil migration	1	0.685666	0.850833	0.75658	cxcr4b
GO:0007155	cell adhesion	9	0.687381	0.850833	0.75658	si:ch211-66e2.3/itgb1b.2/cyr61l2/itgb2/plxnc1/itgb1b.1/myo18aa/si:dkey-237h12.3/plxnb1b
GO:0022610	biological adhesion	9	0.687381	0.850833	0.75658	si:ch211-66e2.3/itgb1b.2/cyr61l2/itgb2/plxnc1/itgb1b.1/myo18aa/si:dkey-237h12.3/plxnb1b
GO:0043043	peptide biosynthetic process	9	0.687381	0.850833	0.75658	ncbp2/eif5/eif2s2/brf1a/cdc123/casc3/rwdd1/eif4e2/trnau1apa
GO:0072358	cardiovascular system development	9	0.687381	0.850833	0.75658	cdkn1a/mt2/per2/igfbp7/flt1/abca1a/narfl/fbxw7/foxo1a
GO:0048706	embryonic skeletal system development	3	0.689488	0.851907	0.757535	ptpn11b/ndnf/sharpin
GO:0002181	cytoplasmic translation	1	0.692106	0.851907	0.757535	rwdd1
GO:0007259	JAK-STAT cascade	1	0.692106	0.851907	0.757535	socs1a
GO:0060215	primitive hemopoiesis	1	0.692106	0.851907	0.757535	numb
GO:0072073	kidney epithelium development	1	0.692106	0.851907	0.757535	iqgap2
GO:0097696	STAT cascade	1	0.692106	0.851907	0.757535	socs1a
GO:0140013	meiotic nuclear division	1	0.692106	0.851907	0.757535	syce2
GO:0035282	segmentation	2	0.693392	0.852737	0.758272	gadd45ba/epha3
GO:0060562	epithelial tube morphogenesis	4	0.694392	0.852737	0.758272	cul4a/trib3/igfbp7/sharpin
GO:0045935	positive regulation of nucleobase-containing compound metabolic process	6	0.694434	0.852737	0.758272	ahr1a/tefa/gtf2f1/nfe2l2a/tp53bp1/lpin1
GO:0030097	hemopoiesis	8	0.696638	0.854764	0.760075	fgfr4/casp8l1/cobll1b/tgfbr2b/brf1a/socs1a/numb/cyp27b1
GO:0002429	immune response-activating cell surface receptor signaling pathway	1	0.698415	0.855586	0.760805	csk
GO:0033334	fin morphogenesis	1	0.698415	0.855586	0.760805	cul4a
GO:0048705	skeletal system morphogenesis	3	0.70059	0.856548	0.761661	ptpn11b/ndnf/sharpin
GO:0018105	peptidyl-serine phosphorylation	2	0.702273	0.856548	0.761661	camk1ga/prkcq
GO:0007422	peripheral nervous system development	1	0.704595	0.856548	0.761661	ndrg1a
GO:0048871	multicellular organismal homeostasis	1	0.704595	0.856548	0.761661	bcl2l1
GO:0051052	regulation of DNA metabolic process	1	0.704595	0.856548	0.761661	igfbp2b
GO:0090100	positive regulation of transmembrane receptor protein serine/threonine kinase signaling pathway	1	0.704595	0.856548	0.761661	inhbab
GO:0097530	granulocyte migration	1	0.704595	0.856548	0.761661	cxcr4b
GO:0071824	protein-DNA complex subunit organization	2	0.706634	0.856548	0.761661	brf1a/hist2h2l
GO:0010628	positive regulation of gene expression	6	0.70773	0.856548	0.761661	ahr1a/tefa/gtf2f1/nfe2l2a/tp53bp1/lpin1
GO:0001754	eye photoreceptor cell differentiation	1	0.710648	0.856548	0.761661	odc1
GO:0001945	lymph vessel development	1	0.710648	0.856548	0.761661	foxo1a
GO:0002768	immune response-regulating cell surface receptor signaling pathway	1	0.710648	0.856548	0.761661	csk
GO:0006479	protein methylation	1	0.710648	0.856548	0.761661	smyd2a
GO:0008213	protein alkylation	1	0.710648	0.856548	0.761661	smyd2a
GO:0009615	response to virus	1	0.710648	0.856548	0.761661	atf3
GO:0016079	synaptic vesicle exocytosis	1	0.710648	0.856548	0.761661	doc2d
GO:0045017	glycerolipid biosynthetic process	1	0.710648	0.856548	0.761661	lpin1
GO:0051168	nuclear export	1	0.710648	0.856548	0.761661	ncbp2
GO:0071417	cellular response to organonitrogen compound	1	0.710648	0.856548	0.761661	socs1a
GO:0003012	muscle system process	2	0.710941	0.856548	0.761661	adrb2b/mybpc1
GO:0006486	protein glycosylation	3	0.711389	0.856548	0.761661	lfng/b3gnt5a/st6galnac5b
GO:0043413	macromolecule glycosylation	3	0.711389	0.856548	0.761661	lfng/b3gnt5a/st6galnac5b
GO:0032446	protein modification by small protein conjugation	5	0.712197	0.85679	0.761876	hectd1/ddb2/socs1a/lonrf1/sharpin
GO:0018209	peptidyl-serine modification	2	0.715195	0.85679	0.761876	camk1ga/prkcq
GO:0001702	gastrulation with mouth forming second	1	0.716578	0.85679	0.761876	fdx1
GO:0006888	ER to Golgi vesicle-mediated transport	1	0.716578	0.85679	0.761876	zgc:63863
GO:0010563	negative regulation of phosphorus metabolic process	1	0.716578	0.85679	0.761876	hrh3
GO:0017157	regulation of exocytosis	1	0.716578	0.85679	0.761876	doc2d
GO:0042274	ribosomal small subunit biogenesis	1	0.716578	0.85679	0.761876	emg1
GO:0045936	negative regulation of phosphate metabolic process	1	0.716578	0.85679	0.761876	hrh3
GO:1901136	carbohydrate derivative catabolic process	1	0.716578	0.85679	0.761876	pglyrp2
GO:0006974	cellular response to DNA damage stimulus	6	0.72063	0.860408	0.765094	ddb2/bcl2l1/neil1/smyd2a/tp53bp1/si:ch211-171h4.3
GO:0006487	protein N-linked glycosylation	1	0.722387	0.860408	0.765094	st6galnac5b
GO:0015893	drug transport	1	0.722387	0.860408	0.765094	slc25a1b
GO:0033339	pectoral fin development	1	0.722387	0.860408	0.765094	cul4a
GO:0035107	appendage morphogenesis	1	0.722387	0.860408	0.765094	cul4a
GO:0003002	regionalization	6	0.723162	0.860668	0.765325	egf/gadd45ba/stk36/bmp1a/epha4a/epha3
GO:0048534	hematopoietic or lymphoid organ development	8	0.724093	0.861114	0.765721	fgfr4/casp8l1/cobll1b/tgfbr2b/brf1a/socs1a/numb/cyp27b1
GO:0030099	myeloid cell differentiation	3	0.72532	0.86191	0.766429	casp8l1/brf1a/numb
GO:0042461	photoreceptor cell development	1	0.728077	0.863188	0.767566	odc1
GO:1901652	response to peptide	1	0.728077	0.863188	0.767566	socs1a
GO:1902600	proton transmembrane transport	1	0.728077	0.863188	0.767566	hvcn1
GO:0031401	positive regulation of protein modification process	4	0.728629	0.863188	0.767566	gadd45ba/inhbab/si:ch211-171h4.3/map2k6
GO:0007187	G-protein coupled receptor signaling pathway, coupled to cyclic nucleotide second messenger	2	0.731689	0.865487	0.76961	adrb2b/gcga
GO:0055123	digestive system development	2	0.731689	0.865487	0.76961	bhmt/ppdpfa
GO:0071495	cellular response to endogenous stimulus	7	0.733622	0.866481	0.770494	fgfr4/tgfbr2b/pparda/nfe2l2a/socs1a/nr1d1/rorab
GO:0000075	cell cycle checkpoint	1	0.733651	0.866481	0.770494	tp53bp1
GO:1901698	response to nitrogen compound	3	0.73542	0.867557	0.771451	socs1a/cpt1b/fasn
GO:0051650	establishment of vesicle localization	2	0.735684	0.867557	0.771451	doc2d/zgc:91968
GO:0048584	positive regulation of response to stimulus	8	0.737182	0.868661	0.772432	cxcr4b/gadd45ba/gcga/cfd/inhbab/csk/c7b/sharpin
GO:0030903	notochord development	1	0.73911	0.87027	0.773863	hps5
GO:0061024	membrane organization	6	0.74044	0.870345	0.77393	doc2d/vamp5/napab/opa1/mtss1la/ndrg1a
GO:0002520	immune system development	8	0.74145	0.870345	0.77393	fgfr4/casp8l1/cobll1b/tgfbr2b/brf1a/socs1a/numb/cyp27b1
GO:0006935	chemotaxis	5	0.741976	0.870345	0.77393	ackr4a/cxcr4b/anos1a/mycbp2/arrb2b
GO:0001667	ameboidal-type cell migration	3	0.741989	0.870345	0.77393	mt2/cxcr4b/epha3
GO:0051656	establishment of organelle localization	3	0.741989	0.870345	0.77393	doc2d/zgc:91968/cetn4
GO:0006906	vesicle fusion	2	0.743522	0.8706	0.774156	doc2d/vamp5
GO:0006334	nucleosome assembly	1	0.744459	0.8706	0.774156	hist2h2l
GO:0032496	response to lipopolysaccharide	1	0.744459	0.8706	0.774156	cxcr4b
GO:1903046	meiotic cell cycle process	1	0.744459	0.8706	0.774156	syce2
GO:0006650	glycerophospholipid metabolic process	2	0.747367	0.871044	0.774552	apoa4b.3/apoa4b.1
GO:0090174	organelle membrane fusion	2	0.747367	0.871044	0.774552	doc2d/vamp5
GO:0009798	axis specification	1	0.749697	0.871044	0.774552	egf
GO:0017156	calcium ion regulated exocytosis	1	0.749697	0.871044	0.774552	doc2d
GO:0032880	regulation of protein localization	1	0.749697	0.871044	0.774552	gcga
GO:0048489	synaptic vesicle transport	1	0.749697	0.871044	0.774552	doc2d
GO:0097479	synaptic vesicle localization	1	0.749697	0.871044	0.774552	doc2d
GO:0097480	establishment of synaptic vesicle localization	1	0.749697	0.871044	0.774552	doc2d
GO:0051648	vesicle localization	2	0.751161	0.871044	0.774552	doc2d/zgc:91968
GO:0051049	regulation of transport	7	0.751556	0.871044	0.774552	doc2d/apoa4b.3/ncbp2/apoa4b.1/hvcn1/gcga/abca1a
GO:0048863	stem cell differentiation	3	0.7516	0.871044	0.774552	fgfr4/tgfbr2b/pparda
GO:0070085	glycosylation	3	0.7516	0.871044	0.774552	lfng/b3gnt5a/st6galnac5b
GO:0051248	negative regulation of protein metabolic process	4	0.754454	0.872824	0.776134	bcl2l1/timp2a/itm2bb/chac1
GO:0035296	regulation of tube diameter	1	0.754829	0.872824	0.776134	adrb2b
GO:0097746	regulation of blood vessel diameter	1	0.754829	0.872824	0.776134	adrb2b
GO:0043010	camera-type eye development	5	0.759717	0.877325	0.780136	bcl6a/socs1a/lepr/epha4a/hbegfa
GO:1903311	regulation of mRNA metabolic process	1	0.759856	0.877325	0.780136	rbm10
GO:0034097	response to cytokine	2	0.762253	0.879435	0.782013	timp2a/socs1a
GO:0002237	response to molecule of bacterial origin	1	0.76478	0.88038	0.782853	cxcr4b
GO:0019932	second-messenger-mediated signaling	1	0.76478	0.88038	0.782853	adrb2b
GO:1903706	regulation of hemopoiesis	1	0.76478	0.88038	0.782853	fgfr4
GO:0043009	chordate embryonic development	8	0.768026	0.881094	0.783488	rab18a/ttpa/ptpn11b/gadd45ba/opa1/ndnf/sharpin/epha3
GO:0001704	formation of primary germ layer	1	0.769604	0.881094	0.783488	epha3
GO:0007204	positive regulation of cytosolic calcium ion concentration	1	0.769604	0.881094	0.783488	tac4
GO:0007269	neurotransmitter secretion	1	0.769604	0.881094	0.783488	doc2d
GO:0031101	fin regeneration	1	0.769604	0.881094	0.783488	lfng
GO:0031497	chromatin assembly	1	0.769604	0.881094	0.783488	hist2h2l
GO:0099643	signal release from synapse	1	0.769604	0.881094	0.783488	doc2d
GO:1904888	cranial skeletal system development	3	0.76996	0.881094	0.783488	ptpn11b/ndnf/sharpin
GO:0009792	embryo development ending in birth or egg hatching	8	0.771935	0.882701	0.784917	rab18a/ttpa/ptpn11b/gadd45ba/opa1/ndnf/sharpin/epha3
GO:0042330	taxis	5	0.774184	0.88413	0.786188	ackr4a/cxcr4b/anos1a/mycbp2/arrb2b
GO:0097529	myeloid leukocyte migration	1	0.774329	0.88413	0.786188	cxcr4b
GO:0009952	anterior/posterior pattern specification	3	0.778718	0.886142	0.787977	gadd45ba/epha4a/epha3
GO:0006665	sphingolipid metabolic process	1	0.778957	0.886142	0.787977	hacd1
GO:0007281	germ cell development	1	0.778957	0.886142	0.787977	cxcr4b
GO:0072006	nephron development	1	0.778957	0.886142	0.787977	iqgap2
GO:0099504	synaptic vesicle cycle	1	0.778957	0.886142	0.787977	doc2d
GO:0120031	plasma membrane bounded cell projection assembly	4	0.783404	0.889645	0.791092	drc1/mtss1la/stk36/cetn4
GO:0030595	leukocyte chemotaxis	1	0.78349	0.889645	0.791092	cxcr4b
GO:0009799	specification of symmetry	4	0.785896	0.889645	0.791092	trib3/sesn1/stk36/bmp1a
GO:0009855	determination of bilateral symmetry	4	0.785896	0.889645	0.791092	trib3/sesn1/stk36/bmp1a
GO:0002009	morphogenesis of an epithelium	7	0.786776	0.889645	0.791092	fdx1/cul4a/rhoca/trib3/igfbp7/csk/sharpin
GO:0006333	chromatin assembly or disassembly	1	0.787931	0.889645	0.791092	hist2h2l
GO:0008654	phospholipid biosynthetic process	1	0.787931	0.889645	0.791092	chpt1
GO:0010001	glial cell differentiation	1	0.787931	0.889645	0.791092	ndrg1a
GO:0099003	vesicle-mediated transport in synapse	1	0.787931	0.889645	0.791092	doc2d
GO:0099531	presynaptic process involved in chemical synaptic transmission	1	0.787931	0.889645	0.791092	doc2d
GO:0060548	negative regulation of cell death	4	0.788366	0.889645	0.791092	bcl2l1/bcl6a/gcga/cyr61l2
GO:0030031	cell projection assembly	4	0.790813	0.890641	0.791977	drc1/mtss1la/stk36/cetn4
GO:0048562	embryonic organ morphogenesis	6	0.791745	0.890641	0.791977	ptpn11b/cul4a/trib3/ndnf/epha4a/sharpin
GO:0035150	regulation of tube size	1	0.792281	0.890641	0.791977	adrb2b
GO:0050880	regulation of blood vessel size	1	0.792281	0.890641	0.791977	adrb2b
GO:0051726	regulation of cell cycle	7	0.792587	0.890641	0.791977	rab11fip4b/cdkn1a/cdc123/gadd45ba/tp53bp1/si:ch211-171h4.3/map2k6
GO:0060041	retina development in camera-type eye	3	0.792705	0.890641	0.791977	bcl6a/socs1a/hbegfa
GO:0021536	diencephalon development	1	0.796542	0.894302	0.795233	mycbp2
GO:0070647	protein modification by small protein conjugation or removal	6	0.797829	0.895097	0.795939	hectd1/ddb2/socs1a/lonrf1/usp2b/sharpin
GO:0016579	protein deubiquitination	1	0.800716	0.897034	0.797662	usp2b
GO:0045055	regulated exocytosis	1	0.800716	0.897034	0.797662	doc2d
GO:0098542	defense response to other organism	2	0.802433	0.898307	0.798794	pglyrp2/lyz
GO:0034728	nucleosome organization	1	0.804804	0.900309	0.800575	hist2h2l
GO:0042074	cell migration involved in gastrulation	1	0.808809	0.90283	0.802816	epha3
GO:0046467	membrane lipid biosynthetic process	1	0.808809	0.90283	0.802816	hacd1
GO:0051235	maintenance of location	1	0.808809	0.90283	0.802816	zgc:198419
GO:0006887	exocytosis	2	0.811491	0.905169	0.804896	doc2d/vamp5
GO:0060027	convergent extension involved in gastrulation	1	0.812732	0.905901	0.805546	csk
GO:0032940	secretion by cell	3	0.813551	0.90616	0.805777	doc2d/vamp5/gcga
GO:0003018	vascular process in circulatory system	1	0.816575	0.908873	0.80819	adrb2b
GO:0015849	organic acid transport	1	0.820339	0.91175	0.810748	slc25a1b
GO:0046942	carboxylic acid transport	1	0.820339	0.91175	0.810748	slc25a1b
GO:0007420	brain development	7	0.821585	0.912478	0.811396	cxcr4b/anos1a/hmgb1a/slc9a3r1a/mycbp2/epha4a/cetn4
GO:0002252	immune effector process	2	0.822991	0.913384	0.812201	cfd/c7b
GO:0045995	regulation of embryonic development	1	0.824026	0.913877	0.812639	fdx1
GO:0001708	cell fate specification	1	0.827637	0.915002	0.81364	ppdpfa
GO:0008033	tRNA processing	1	0.827637	0.915002	0.81364	pus7l
GO:0060326	cell chemotaxis	1	0.827637	0.915002	0.81364	cxcr4b
GO:1901699	cellular response to nitrogen compound	1	0.827637	0.915002	0.81364	socs1a
GO:0006417	regulation of translation	3	0.828	0.915002	0.81364	ncbp2/cdc123/casc3
GO:0045087	innate immune response	3	0.830313	0.915892	0.814431	socs1a/cfd/csk
GO:0042063	gliogenesis	1	0.831175	0.915892	0.814431	ndrg1a
GO:0046530	photoreceptor cell differentiation	1	0.831175	0.915892	0.814431	odc1
GO:0060249	anatomical structure homeostasis	1	0.831175	0.915892	0.814431	bcl2l1
GO:0060271	cilium assembly	3	0.834859	0.919296	0.817458	drc1/stk36/cetn4
GO:0051301	cell division	2	0.83648	0.920172	0.818237	rab11fip4b/cdc123
GO:0002757	immune response-activating signal transduction	1	0.838035	0.920172	0.818237	csk
GO:0006323	DNA packaging	1	0.838035	0.920172	0.818237	hist2h2l
GO:0006814	sodium ion transport	1	0.838035	0.920172	0.818237	slc9a7
GO:0043410	positive regulation of MAPK cascade	1	0.84136	0.922512	0.820318	gadd45ba
GO:0051321	meiotic cell cycle	1	0.84136	0.922512	0.820318	syce2
GO:0002764	immune response-regulating signaling pathway	1	0.844616	0.925427	0.822909	csk
GO:0035050	embryonic heart tube development	2	0.846597	0.926939	0.824255	myh7/trib3
GO:0022412	cellular process involved in reproduction in multicellular organism	1	0.847807	0.926951	0.824265	cxcr4b
GO:0050900	leukocyte migration	1	0.847807	0.926951	0.824265	cxcr4b
GO:0051480	regulation of cytosolic calcium ion concentration	1	0.850931	0.92971	0.826719	tac4
GO:0051704	multi-organism process	6	0.852913	0.931218	0.828059	cxcr4b/atf3/cpt1b/pglyrp2/lyz/limk1a
GO:0044782	cilium organization	3	0.854042	0.931721	0.828507	drc1/stk36/cetn4
GO:0007507	heart development	7	0.85474	0.931721	0.828507	myh7/hopx/cul4a/trib3/opa1/smyd2a/mmd
GO:0000226	microtubule cytoskeleton organization	3	0.856049	0.931721	0.828507	drc1/stk36/cetn4
GO:0070925	organelle assembly	7	0.856186	0.931721	0.828507	drc1/myh7/mybpc1/smyd2a/stk36/myo18aa/cetn4
GO:0003006	developmental process involved in reproduction	1	0.85699	0.931721	0.828507	cxcr4b
GO:0070646	protein modification by small protein removal	1	0.85699	0.931721	0.828507	usp2b
GO:0060322	head development	7	0.861855	0.9341	0.830622	cxcr4b/anos1a/hmgb1a/slc9a3r1a/mycbp2/epha4a/cetn4
GO:0046903	secretion	3	0.861926	0.9341	0.830622	doc2d/vamp5/gcga
GO:0033043	regulation of organelle organization	5	0.862216	0.9341	0.830622	gsna/eps8a/gmfb/smyd2a/limk1a
GO:0014031	mesenchymal cell development	1	0.862804	0.9341	0.830622	pparda
GO:0014032	neural crest cell development	1	0.862804	0.9341	0.830622	pparda
GO:0048864	stem cell development	1	0.862804	0.9341	0.830622	pparda
GO:0007368	determination of left/right symmetry	3	0.865727	0.936609	0.832853	trib3/sesn1/stk36
GO:0001501	skeletal system development	4	0.866414	0.936697	0.832931	ptpn11b/egf/ndnf/sharpin
GO:0006913	nucleocytoplasmic transport	1	0.868382	0.937513	0.833657	ncbp2
GO:0051169	nuclear transport	1	0.868382	0.937513	0.833657	ncbp2
GO:0051640	organelle localization	3	0.869436	0.937995	0.834086	doc2d/zgc:91968/cetn4
GO:0010608	posttranscriptional regulation of gene expression	3	0.871256	0.938969	0.834952	ncbp2/cdc123/casc3
GO:0007178	transmembrane receptor protein serine/threonine kinase signaling pathway	2	0.871553	0.938969	0.834952	tgfbr2b/inhbab
GO:0043066	negative regulation of apoptotic process	3	0.873054	0.939931	0.835807	bcl2l1/bcl6a/gcga
GO:0007498	mesoderm development	1	0.876327	0.942143	0.837774	epha3
GO:0071103	DNA conformation change	1	0.876327	0.942143	0.837774	hist2h2l
GO:1902533	positive regulation of intracellular signal transduction	2	0.877682	0.942944	0.838486	gadd45ba/sharpin
GO:0030218	erythrocyte differentiation	1	0.878868	0.943562	0.839036	numb
GO:0032269	negative regulation of cellular protein metabolic process	3	0.880025	0.944149	0.839558	bcl2l1/timp2a/chac1
GO:0034101	erythrocyte homeostasis	1	0.881357	0.94465	0.840003	numb
GO:0043069	negative regulation of programmed cell death	3	0.881714	0.94465	0.840003	bcl2l1/bcl6a/gcga
GO:0006886	intracellular protein transport	5	0.882947	0.944947	0.840267	napab/slc9a3r1a/ssr1/ipo11/snx17
GO:0098813	nuclear chromosome segregation	1	0.883794	0.944947	0.840267	syce2
GO:0010647	positive regulation of cell communication	4	0.883825	0.944947	0.840267	gadd45ba/gcga/inhbab/sharpin
GO:0023056	positive regulation of signaling	4	0.885305	0.945876	0.841093	gadd45ba/gcga/inhbab/sharpin
GO:0048703	embryonic viscerocranium morphogenesis	1	0.886182	0.946159	0.841345	ptpn11b
GO:0007005	mitochondrion organization	2	0.889139	0.94866	0.843569	dnaja3a/opa1
GO:0051259	protein complex oligomerization	1	0.890812	0.94979	0.844574	cbr4
GO:0048285	organelle fission	2	0.892732	0.950871	0.845535	opa1/syce2
GO:0014033	neural crest cell differentiation	1	0.893056	0.950871	0.845535	pparda
GO:0007369	gastrulation	3	0.894482	0.951085	0.845725	fdx1/csk/epha3
GO:0060485	mesenchyme development	2	0.894487	0.951085	0.845725	pparda/mmd
GO:0002262	myeloid cell homeostasis	1	0.895254	0.951246	0.845868	numb
GO:0016050	vesicle organization	2	0.897919	0.953422	0.847804	doc2d/vamp5
GO:0071804	cellular potassium ion transport	1	0.901581	0.955998	0.850094	slc9a7
GO:0071805	potassium ion transmembrane transport	1	0.901581	0.955998	0.850094	slc9a7
GO:0019221	cytokine-mediated signaling pathway	1	0.903605	0.957486	0.851418	socs1a
GO:0030111	regulation of Wnt signaling pathway	1	0.909429	0.962998	0.856319	plpp3
GO:0071345	cellular response to cytokine stimulus	1	0.911291	0.96431	0.857485	socs1a
GO:0018205	peptidyl-lysine modification	1	0.913116	0.965579	0.858614	smyd2a
GO:0006643	membrane lipid metabolic process	1	0.914902	0.966807	0.859706	hacd1
GO:0001947	heart looping	1	0.918367	0.968931	0.861595	trib3
GO:0006260	DNA replication	1	0.920046	0.968931	0.861595	igfbp2b
GO:0007276	gamete generation	1	0.920046	0.968931	0.861595	cxcr4b
GO:0030902	hindbrain development	1	0.920046	0.968931	0.861595	epha4a
GO:0060070	canonical Wnt signaling pathway	1	0.920046	0.968931	0.861595	egf
GO:0048193	Golgi vesicle transport	1	0.921691	0.970002	0.862547	zgc:63863
GO:0032504	multicellular organism reproduction	1	0.923302	0.970083	0.862619	cxcr4b
GO:0048609	multicellular organismal reproductive process	1	0.923302	0.970083	0.862619	cxcr4b
GO:0022402	cell cycle process	4	0.923727	0.970083	0.862619	rab11fip4b/cdkn1a/cdc123/syce2
GO:0006836	neurotransmitter transport	1	0.926425	0.970083	0.862619	doc2d
GO:0031047	gene silencing by RNA	1	0.926425	0.970083	0.862619	ncbp2
GO:0090092	regulation of transmembrane receptor protein serine/threonine kinase signaling pathway	1	0.926425	0.970083	0.862619	inhbab
GO:0016569	covalent chromatin modification	2	0.926956	0.970083	0.862619	hdac10/smyd2a
GO:0098660	inorganic ion transmembrane transport	4	0.927737	0.970083	0.862619	slc26a6/slc20a1b/hvcn1/slc9a7
GO:0010564	regulation of cell cycle process	1	0.927939	0.970083	0.862619	rab11fip4b
GO:0003007	heart morphogenesis	2	0.928182	0.970083	0.862619	trib3/mmd
GO:0007059	chromosome segregation	1	0.929422	0.970083	0.862619	syce2
GO:0048872	homeostasis of number of cells	1	0.929422	0.970083	0.862619	numb
GO:0034220	ion transmembrane transport	6	0.929924	0.970083	0.862619	slc26a6/slc20a1b/hvcn1/aqp8a.1/slc9a7/slc25a1b
GO:0048762	mesenchymal cell differentiation	1	0.930874	0.970419	0.862917	pparda
GO:0006914	autophagy	1	0.932296	0.970593	0.863072	nr1d1
GO:0061919	process utilizing autophagic mechanism	1	0.932296	0.970593	0.863072	nr1d1
GO:0006874	cellular calcium ion homeostasis	1	0.93369	0.970736	0.8632	tac4
GO:0022618	ribonucleoprotein complex assembly	1	0.93369	0.970736	0.8632	snrpd3
GO:0045321	leukocyte activation	1	0.936391	0.972316	0.864604	ndrg1a
GO:0016055	Wnt signaling pathway	2	0.93731	0.972316	0.864604	egf/plpp3
GO:0003143	embryonic heart tube morphogenesis	1	0.937701	0.972316	0.864604	trib3
GO:0198738	cell-cell signaling by wnt	2	0.938371	0.972316	0.864604	egf/plpp3
GO:0006364	rRNA processing	1	0.938983	0.972316	0.864604	emg1
GO:0006399	tRNA metabolic process	1	0.938983	0.972316	0.864604	pus7l
GO:1905114	cell surface receptor signaling pathway involved in cell-cell signaling	2	0.941451	0.973365	0.865537	egf/plpp3
GO:0071363	cellular response to growth factor stimulus	2	0.942446	0.973365	0.865537	fgfr4/tgfbr2b
GO:0070848	response to growth factor	2	0.943424	0.973365	0.865537	fgfr4/tgfbr2b
GO:0051216	cartilage development	1	0.943855	0.973365	0.865537	egf
GO:0034660	ncRNA metabolic process	3	0.945824	0.973365	0.865537	rpap2/pus7l/emg1
GO:0071826	ribonucleoprotein complex subunit organization	1	0.946143	0.973365	0.865537	snrpd3
GO:0045165	cell fate commitment	1	0.947252	0.973365	0.865537	ppdpfa
GO:0007346	regulation of mitotic cell cycle	3	0.947451	0.973365	0.865537	cdkn1a/si:ch211-171h4.3/map2k6
GO:0009967	positive regulation of signal transduction	3	0.947451	0.973365	0.865537	gadd45ba/inhbab/sharpin
GO:0019953	sexual reproduction	1	0.948339	0.973365	0.865537	cxcr4b
GO:0055074	calcium ion homeostasis	1	0.948339	0.973365	0.865537	tac4
GO:0061448	connective tissue development	1	0.948339	0.973365	0.865537	egf
GO:0016072	rRNA metabolic process	1	0.949403	0.973365	0.865537	emg1
GO:0044703	multi-organism reproductive process	1	0.949403	0.973365	0.865537	cxcr4b
GO:0022414	reproductive process	2	0.949841	0.973365	0.865537	cxcr4b/syce2
GO:0060627	regulation of vesicle-mediated transport	1	0.950445	0.973365	0.865537	doc2d
GO:0000003	reproduction	2	0.950699	0.973365	0.865537	cxcr4b/syce2
GO:0034470	ncRNA processing	2	0.951543	0.973584	0.865732	pus7l/emg1
GO:0060026	convergent extension	1	0.954404	0.97522	0.867187	csk
GO:0072503	cellular divalent inorganic cation homeostasis	1	0.954404	0.97522	0.867187	tac4
GO:0000280	nuclear division	1	0.958047	0.977651	0.869349	syce2
GO:0006813	potassium ion transport	1	0.958047	0.977651	0.869349	slc9a7
GO:0001775	cell activation	1	0.962976	0.982032	0.873244	ndrg1a
GO:0072507	divalent inorganic cation homeostasis	1	0.965936	0.984401	0.875351	tac4
GO:0061371	determination of heart left/right asymmetry	1	0.968	0.985834	0.876625	trib3
GO:0001822	kidney development	1	0.96994	0.985834	0.876625	iqgap2
GO:0016458	gene silencing	1	0.97056	0.985834	0.876625	ncbp2
GO:0006281	DNA repair	2	0.970804	0.985834	0.876625	ddb2/neil1
GO:0006325	chromatin organization	3	0.97091	0.985834	0.876625	hdac10/hist2h2l/smyd2a
GO:0072001	renal system development	1	0.971167	0.985834	0.876625	iqgap2
GO:0001655	urogenital system development	1	0.973474	0.987434	0.878048	iqgap2
GO:0098742	cell-cell adhesion via plasma-membrane adhesion molecules	1	0.974022	0.987434	0.878048	si:dkey-237h12.3
GO:0098609	cell-cell adhesion	2	0.975974	0.988765	0.879231	si:ch211-66e2.3/si:dkey-237h12.3
GO:0034765	regulation of ion transmembrane transport	1	0.978014	0.990183	0.880492	hvcn1
GO:0034762	regulation of transmembrane transport	1	0.979348	0.990426	0.880709	hvcn1
GO:0015672	monovalent inorganic cation transport	2	0.979535	0.990426	0.880709	hvcn1/slc9a7
GO:0046777	protein autophosphorylation	1	0.982155	0.991876	0.881998	csk
GO:0043269	regulation of ion transport	1	0.982885	0.991876	0.881998	hvcn1
GO:0022613	ribonucleoprotein complex biogenesis	2	0.982894	0.991876	0.881998	snrpd3/emg1
GO:0042254	ribosome biogenesis	1	0.985518	0.993875	0.883776	emg1
GO:0098657	import into cell	1	0.986398	0.994114	0.883988	slc9a7
GO:0006259	DNA metabolic process	3	0.988833	0.99527	0.885016	ddb2/neil1/igfbp2b
GO:0007017	microtubule-based process	3	0.988833	0.99527	0.885016	drc1/stk36/cetn4
GO:0051276	chromosome organization	4	0.98978	0.995399	0.88513	hdac10/hist2h2l/smyd2a/syce2
GO:0098662	inorganic cation transmembrane transport	2	0.990248	0.995399	0.88513	hvcn1/slc9a7
GO:0030001	metal ion transport	3	0.993241	0.995914	0.885588	zgc:198419/slc9a7/hephl1a
GO:0007268	chemical synaptic transmission	1	0.994231	0.995914	0.885588	doc2d
GO:0098916	anterograde trans-synaptic signaling	1	0.994231	0.995914	0.885588	doc2d
GO:0099537	trans-synaptic signaling	1	0.994231	0.995914	0.885588	doc2d
GO:0099536	synaptic signaling	1	0.99435	0.995914	0.885588	doc2d
GO:0098655	cation transmembrane transport	2	0.994687	0.995914	0.885588	hvcn1/slc9a7
GO:0000278	mitotic cell cycle	3	0.99527	0.995914	0.885588	cdkn1a/si:ch211-171h4.3/map2k6
GO:0050877	nervous system process	2	0.996127	0.996127	0.885778	pcxa/fbxw7

## Sheet: MF ctrl F0F1
	Description	Count	pvalue	p.adjust	qvalue	geneID
GO:0048037	cofactor binding	24	5.15093e-06	0.00214794	0.0019682	fdx1/chdh/cyp1a/cbsb/cyp4t8/ndor1/cyp27a7/acox1/cyp2k16/lancl1/pcxa/cyp2aa12/si:ch211-113j14.1/cyp4v8/fasn/narfl/p4ha3/cyp2k21/aco1/acbd7/zgc:136493/hmox1a/cyp27b1/cyp2ad6
GO:0020037	heme binding	12	2.43332e-05	0.00439895	0.00403085	cyp1a/cbsb/cyp4t8/cyp27a7/cyp2k16/cyp2aa12/si:ch211-113j14.1/cyp4v8/cyp2k21/hmox1a/cyp27b1/cyp2ad6
GO:0046906	tetrapyrrole binding	12	3.19051e-05	0.00439895	0.00403085	cyp1a/cbsb/cyp4t8/cyp27a7/cyp2k16/cyp2aa12/si:ch211-113j14.1/cyp4v8/cyp2k21/hmox1a/cyp27b1/cyp2ad6
GO:0016705	oxidoreductase activity, acting on paired donors, with incorporation or reduction of molecular oxygen	13	4.21962e-05	0.00439895	0.00403085	fads2/cyp1a/cyp4t8/cyp27a7/cyp2k16/cyp2aa12/si:ch211-113j14.1/cyp4v8/p4ha3/cyp2k21/hmox1a/cyp27b1/cyp2ad6
GO:0016614	oxidoreductase activity, acting on CH-OH group of donors	9	6.95846e-05	0.00580336	0.00531773	ehhadh/chdh/hsd17b12a/hsd3b7/impdh1b/cbr4/ldhbb/fasn/zgc:136493
GO:0005506	iron ion binding	13	8.70658e-05	0.00605107	0.00554472	zgc:198419/cyp1a/cyp4t8/cyp27a7/cyp2k16/alox5b.3/cyp2aa12/si:ch211-113j14.1/cyp4v8/p4ha3/cyp2k21/cyp27b1/cyp2ad6
GO:0016616	oxidoreductase activity, acting on the CH-OH group of donors, NAD or NADP as acceptor	8	0.000194988	0.0116157	0.0106437	ehhadh/hsd17b12a/hsd3b7/impdh1b/cbr4/ldhbb/fasn/zgc:136493
GO:0004497	monooxygenase activity	10	0.000286903	0.0149548	0.0137034	cyp1a/cyp4t8/cyp27a7/cyp2k16/cyp2aa12/si:ch211-113j14.1/cyp4v8/cyp2k21/cyp27b1/cyp2ad6
GO:0016829	lyase activity	10	0.000941062	0.0436025	0.0399538	ehhadh/odc1/cbsb/auh/hacd1/fasn/chac1/aco1/ggact.1/amd1
GO:0016836	hydro-lyase activity	5	0.00244275	0.0935577	0.0857288	cbsb/auh/hacd1/fasn/aco1
GO:0016712	oxidoreductase activity, acting on paired donors, with incorporation or reduction of molecular oxygen, reduced flavin or flavoprotein as one donor, and incorporation of one atom of oxygen	4	0.00248812	0.0935577	0.0857288	cyp1a/cyp2aa12/cyp2k21/cyp2ad6
GO:0016853	isomerase activity	8	0.00290331	0.0935577	0.0857288	ehhadh/pgam1a/hsd3b7/ppiab/fkbp11/rpia/tpi1b/pus7l
GO:0016835	carbon-oxygen lyase activity	5	0.00291667	0.0935577	0.0857288	cbsb/auh/hacd1/fasn/aco1
GO:0001077	transcriptional activator activity, RNA polymerase II proximal promoter sequence-specific DNA binding	4	0.00488601	0.145533	0.133355	tefa/tefb/dbpa/dbpb
GO:0000982	transcription factor activity, RNA polymerase II proximal promoter sequence-specific DNA binding	5	0.00677048	0.188219	0.172469	tefa/nr1d1/tefb/dbpa/dbpb
GO:0004869	cysteine-type endopeptidase inhibitor activity	3	0.0106003	0.276269	0.253151	bcl2l1/si:ch211-284e20.8/ahsg2
GO:0042887	amide transmembrane transporter activity	3	0.0146843	0.28869	0.264532	abcb4/aqp10a/aqp8a.1
GO:0016861	intramolecular oxidoreductase activity, interconverting aldoses and ketoses	2	0.0150081	0.28869	0.264532	rpia/tpi1b
GO:0031210	phosphatidylcholine binding	2	0.0150081	0.28869	0.264532	apoa4b.3/apoa4b.1
GO:0050997	quaternary ammonium group binding	2	0.0150081	0.28869	0.264532	apoa4b.3/apoa4b.1
GO:0001158	enhancer sequence-specific DNA binding	2	0.0181122	0.28869	0.264532	znf395b/znf395a
GO:0015204	urea transmembrane transporter activity	2	0.0181122	0.28869	0.264532	aqp10a/aqp8a.1
GO:0016671	oxidoreductase activity, acting on a sulfur group of donors, disulfide as acceptor	2	0.0181122	0.28869	0.264532	txnl1/msra
GO:0019531	oxalate transmembrane transporter activity	2	0.0181122	0.28869	0.264532	slc26a6/slc26a3.1
GO:0060228	phosphatidylcholine-sterol O-acyltransferase activator activity	2	0.0181122	0.28869	0.264532	apoa4b.3/apoa4b.1
GO:0016810	hydrolase activity, acting on carbon-nitrogen (but not peptide) bonds	6	0.020415	0.28869	0.264532	hdac10/acy1/gda/agmat/pglyrp2/uraha
GO:0005520	insulin-like growth factor binding	3	0.0213323	0.28869	0.264532	igfbp7/cyr61l2/igfbp2b
GO:0008271	secondary active sulfate transmembrane transporter activity	2	0.0214613	0.28869	0.264532	slc26a6/slc26a3.1
GO:0016840	carbon-nitrogen lyase activity	2	0.0214613	0.28869	0.264532	chac1/ggact.1
GO:0035326	enhancer binding	2	0.0214613	0.28869	0.264532	znf395b/znf395a
GO:0072341	modified amino acid binding	2	0.0214613	0.28869	0.264532	lancl1/fasn
GO:0008443	phosphofructokinase activity	2	0.025045	0.308505	0.282689	pfkfb4b/pfklb
GO:0016653	oxidoreductase activity, acting on NAD(P)H, heme protein as acceptor	2	0.025045	0.308505	0.282689	cyb5r1/ndor1
GO:0019199	transmembrane receptor protein kinase activity	5	0.0251682	0.308505	0.282689	fgfr4/tgfbr2b/flt1/epha4a/epha3
GO:0001228	transcriptional activator activity, RNA polymerase II transcription regulatory region sequence-specific DNA binding	4	0.0267944	0.308505	0.282689	tefa/tefb/dbpa/dbpb
GO:0003743	translation initiation factor activity	4	0.0282872	0.308505	0.282689	eif5/eif2s2/brf1a/eif4e2
GO:0016811	hydrolase activity, acting on carbon-nitrogen (but not peptide) bonds, in linear amides	4	0.0282872	0.308505	0.282689	hdac10/acy1/pglyrp2/uraha
GO:0000976	transcription regulatory region sequence-specific DNA binding	8	0.0286123	0.308505	0.282689	tefa/nfe2l2a/tefb/ciarta/dbpa/znf395b/dbpb/znf395a
GO:0015116	sulfate transmembrane transporter activity	2	0.028853	0.308505	0.282689	slc26a6/slc26a3.1
GO:0005372	water transmembrane transporter activity	2	0.0328753	0.342725	0.314046	aqp10a/aqp8a.1
GO:0004896	cytokine receptor activity	4	0.0364839	0.361034	0.330822	ackr4a/ebi3/cxcr4b/lepr
GO:1901681	sulfur compound binding	4	0.0364839	0.361034	0.330822	lancl1/cyr61l2/pcxa/acbd7
GO:1990837	sequence-specific double-stranded DNA binding	8	0.0372289	0.361034	0.330822	tefa/nfe2l2a/tefb/ciarta/dbpa/znf395b/dbpb/znf395a
GO:0005003	ephrin receptor activity	2	0.0415251	0.364224	0.333746	epha4a/epha3
GO:0033764	steroid dehydrogenase activity, acting on the CH-OH group of donors, NAD or NADP as acceptor	2	0.0415251	0.364224	0.333746	hsd17b12a/hsd3b7
GO:0004714	transmembrane receptor protein tyrosine kinase activity	4	0.0419924	0.364224	0.333746	fgfr4/flt1/epha4a/epha3
GO:0046943	carboxylic acid transmembrane transporter activity	6	0.0438178	0.364224	0.333746	slc26a6/slc38a4/slc43a2b/slc27a1b/slc26a3.1/slc25a1b
GO:0001871	pattern binding	2	0.0461341	0.364224	0.333746	enpp1/stbd1
GO:0015485	cholesterol binding	2	0.0461341	0.364224	0.333746	apoa4b.3/apoa4b.1
GO:0017069	snRNA binding	2	0.0461341	0.364224	0.333746	ncbp2/snrpa1
GO:0017154	semaphorin receptor activity	2	0.0461341	0.364224	0.333746	plxnc1/plxnb1b
GO:0030247	polysaccharide binding	2	0.0461341	0.364224	0.333746	enpp1/stbd1
GO:0005342	organic acid transmembrane transporter activity	6	0.0465349	0.364224	0.333746	slc26a6/slc38a4/slc43a2b/slc27a1b/slc26a3.1/slc25a1b
GO:0004197	cysteine-type endopeptidase activity	5	0.0471658	0.364224	0.333746	casp8l1/ctsla/ctsc/zgc:162184/zgc:136872
GO:0008195	phosphatidate phosphatase activity	2	0.0509207	0.386072	0.353765	plpp3/lpin1
GO:0030414	peptidase inhibitor activity	6	0.0522768	0.388342	0.355845	bcl2l1/anos1a/timp2a/si:ch211-284e20.8/ahsg2/si:dkey-8k3.2
GO:0016651	oxidoreductase activity, acting on NAD(P)H	4	0.0543399	0.388342	0.355845	cyb5r1/ndor1/txnl1/narfl
GO:0019838	growth factor binding	3	0.0554165	0.388342	0.355845	igfbp7/cyr61l2/igfbp2b
GO:0015301	anion:anion antiporter activity	2	0.0558766	0.388342	0.355845	slc26a6/slc26a3.1
GO:0032934	sterol binding	2	0.0558766	0.388342	0.355845	apoa4b.3/apoa4b.1
GO:0016879	ligase activity, forming carbon-nitrogen bonds	3	0.0584698	0.399703	0.366256	naprt/fpgs/pcxa
GO:0099516	ion antiporter activity	3	0.0616008	0.403747	0.369961	slc26a6/slc9a7/slc26a3.1
GO:0005044	scavenger receptor activity	3	0.0648083	0.403747	0.369961	hhipl1/ackr4a/enpp1
GO:0015248	sterol transporter activity	2	0.0662629	0.403747	0.369961	apoa4b.3/apoa4b.1
GO:0017127	cholesterol transporter activity	2	0.0662629	0.403747	0.369961	apoa4b.3/apoa4b.1
GO:0019200	carbohydrate kinase activity	2	0.0662629	0.403747	0.369961	pfkfb4b/pfklb
GO:0000989	transcription factor activity, transcription factor binding	8	0.0700804	0.403747	0.369961	brf1a/sp4/trib3/pbxip1b/cited4a/si:dkey-97a13.6/zgc:136493/lpin1
GO:0008168	methyltransferase activity	7	0.0702242	0.403747	0.369961	bhmt/zgc:64002/smyd2a/comta/comtb/mettl7a/emg1
GO:0001637	G-protein coupled chemoattractant receptor activity	2	0.0716778	0.403747	0.369961	ackr4a/cxcr4b
GO:0004950	chemokine receptor activity	2	0.0716778	0.403747	0.369961	ackr4a/cxcr4b
GO:0008171	O-methyltransferase activity	2	0.0716778	0.403747	0.369961	comta/comtb
GO:0016229	steroid dehydrogenase activity	2	0.0716778	0.403747	0.369961	hsd17b12a/hsd3b7
GO:1901682	sulfur compound transmembrane transporter activity	2	0.0716778	0.403747	0.369961	slc26a6/slc26a3.1
GO:0061134	peptidase regulator activity	6	0.0719919	0.403747	0.369961	bcl2l1/anos1a/timp2a/si:ch211-284e20.8/ahsg2/si:dkey-8k3.2
GO:0050662	coenzyme binding	8	0.0729433	0.403747	0.369961	chdh/cbsb/ndor1/acox1/pcxa/p4ha3/acbd7/zgc:136493
GO:0008047	enzyme activator activity	10	0.0752879	0.403747	0.369961	apoa4b.3/myo9aa/si:dkey-166d12.2/apoa4b.1/zgc:63863/guca1g/si:dkey-91m11.5/myo9b/arhgap10/rasal3
GO:0016866	intramolecular transferase activity	2	0.0772303	0.403747	0.369961	pgam1a/pus7l
GO:0038024	cargo receptor activity	3	0.0783808	0.403747	0.369961	hhipl1/ackr4a/enpp1
GO:0000988	transcription factor activity, protein binding	8	0.0788796	0.403747	0.369961	brf1a/sp4/trib3/pbxip1b/cited4a/si:dkey-97a13.6/zgc:136493/lpin1
GO:0003712	transcription cofactor activity	7	0.0800104	0.403747	0.369961	sp4/trib3/pbxip1b/cited4a/si:dkey-97a13.6/zgc:136493/lpin1
GO:0052689	carboxylic ester hydrolase activity	4	0.0814877	0.403747	0.369961	mgll/lipg/pgls/dagla
GO:0004879	nuclear receptor activity	3	0.0819532	0.403747	0.369961	pparda/nr1d1/rorab
GO:0098531	transcription factor activity, direct ligand regulated sequence-specific DNA binding	3	0.0819532	0.403747	0.369961	pparda/nr1d1/rorab
GO:0015106	bicarbonate transmembrane transporter activity	2	0.0829132	0.403747	0.369961	slc26a6/slc26a3.1
GO:0016831	carboxy-lyase activity	2	0.0829132	0.403747	0.369961	odc1/amd1
GO:0016741	transferase activity, transferring one-carbon groups	7	0.08344	0.403747	0.369961	bhmt/zgc:64002/smyd2a/comta/comtb/mettl7a/emg1
GO:0005089	Rho guanyl-nucleotide exchange factor activity	4	0.084235	0.403747	0.369961	arhgef5/si:ch73-15b2.5/si:dkey-91m11.5/arhgef10lb
GO:0033218	amide binding	5	0.0868293	0.407756	0.373635	erap2/itm2bb/lancl1/pcxa/fasn
GO:0003713	transcription coactivator activity	4	0.0870271	0.407756	0.373635	sp4/cited4a/si:dkey-97a13.6/lpin1
GO:0008395	steroid hydroxylase activity	3	0.0930791	0.428976	0.393079	cyp2k16/cyp2aa12/cyp2ad6
GO:0005178	integrin binding	2	0.0946422	0.428976	0.393079	si:ch211-66e2.3/cyr61l2
GO:0043178	alcohol binding	2	0.0946422	0.428976	0.393079	apoa4b.3/apoa4b.1
GO:0003690	double-stranded DNA binding	8	0.0966487	0.43336	0.397096	tefa/nfe2l2a/tefb/ciarta/dbpa/znf395b/dbpb/znf395a
GO:0003714	transcription corepressor activity	3	0.100823	0.444725	0.40751	trib3/pbxip1b/zgc:136493
GO:0004713	protein tyrosine kinase activity	5	0.101316	0.444725	0.40751	fgfr4/flt1/csk/epha4a/epha3
GO:0004866	endopeptidase inhibitor activity	5	0.103842	0.449902	0.412254	bcl2l1/timp2a/si:ch211-284e20.8/ahsg2/si:dkey-8k3.2
GO:0004857	enzyme inhibitor activity	8	0.10542	0.449902	0.412254	cdkn1a/bcl2l1/anos1a/timp2a/socs1a/si:ch211-284e20.8/ahsg2/si:dkey-8k3.2
GO:0004112	cyclic-nucleotide phosphodiesterase activity	2	0.106811	0.449902	0.412254	cnp/pde9a
GO:0004198	calcium-dependent cysteine-type endopeptidase activity	2	0.106811	0.449902	0.412254	zgc:162184/zgc:136872
GO:0051536	iron-sulfur cluster binding	3	0.112901	0.453267	0.415337	fdx1/narfl/aco1
GO:0051540	metal cluster binding	3	0.112901	0.453267	0.415337	fdx1/narfl/aco1
GO:0005310	dicarboxylic acid transmembrane transporter activity	2	0.113045	0.453267	0.415337	slc26a6/slc26a3.1
GO:0016790	thiolester hydrolase activity	2	0.113045	0.453267	0.415337	fasn/acot17
GO:0051539	4 iron, 4 sulfur cluster binding	2	0.113045	0.453267	0.415337	narfl/aco1
GO:0061135	endopeptidase regulator activity	5	0.116928	0.464372	0.425514	bcl2l1/timp2a/si:ch211-284e20.8/ahsg2/si:dkey-8k3.2
GO:0051015	actin filament binding	5	0.119636	0.469865	0.430546	myh7/gsna/scinlb/mybpc1/myo18aa
GO:0008135	translation factor activity, RNA binding	4	0.120565	0.469865	0.430546	eif5/eif2s2/brf1a/eif4e2
GO:0016702	oxidoreductase activity, acting on single donors with incorporation of molecular oxygen, incorporation of two atoms of oxygen	2	0.125781	0.485653	0.445013	alox5b.3/p4ha3
GO:0005088	Ras guanyl-nucleotide exchange factor activity	4	0.127186	0.486574	0.445857	arhgef5/si:ch73-15b2.5/si:dkey-91m11.5/arhgef10lb
GO:0003779	actin binding	10	0.130757	0.495098	0.453668	myo9aa/myh7/gsna/eps8a/scinlb/gmfb/mybpc1/mtss1la/myo9b/myo18aa
GO:0016701	oxidoreductase activity, acting on single donors with incorporation of molecular oxygen	2	0.132271	0.495098	0.453668	alox5b.3/p4ha3
GO:0015297	antiporter activity	3	0.134163	0.495098	0.453668	slc26a6/slc9a7/slc26a3.1
GO:0050660	flavin adenine dinucleotide binding	3	0.134163	0.495098	0.453668	chdh/ndor1/acox1
GO:0019842	vitamin binding	4	0.140871	0.509758	0.467101	cbsb/pcxa/fasn/p4ha3
GO:0016298	lipase activity	3	0.14303	0.509758	0.467101	mgll/lipg/dagla
GO:0005096	GTPase activator activity	7	0.144595	0.509758	0.467101	myo9aa/si:dkey-166d12.2/zgc:63863/si:dkey-91m11.5/myo9b/arhgap10/rasal3
GO:0008234	cysteine-type peptidase activity	6	0.144949	0.509758	0.467101	casp8l1/ctsla/ctsc/zgc:162184/usp2b/zgc:136872
GO:0003684	damaged DNA binding	2	0.14547	0.509758	0.467101	ddb2/neil1
GO:0016860	intramolecular oxidoreductase activity	2	0.14547	0.509758	0.467101	rpia/tpi1b
GO:0000981	RNA polymerase II transcription factor activity, sequence-specific DNA binding	10	0.15629	0.527231	0.483112	tefa/pparda/sp4/tfdp1b/nr1d1/tefb/rorab/dbpa/dbpb/foxo1a
GO:0030695	GTPase regulator activity	7	0.166253	0.527231	0.483112	myo9aa/si:dkey-166d12.2/zgc:63863/si:dkey-91m11.5/myo9b/arhgap10/rasal3
GO:0005179	hormone activity	4	0.17363	0.527231	0.483112	ins/sst1.1/gcga/inhbab
GO:0050839	cell adhesion molecule binding	3	0.175468	0.527231	0.483112	si:ch211-66e2.3/cyr61l2/si:dkey-237h12.3
GO:0000990	transcription factor activity, core RNA polymerase binding	1	0.176671	0.527231	0.483112	brf1a
GO:0003906	DNA-(apurinic or apyrimidinic site) endonuclease activity	1	0.176671	0.527231	0.483112	neil1
GO:0004791	thioredoxin-disulfide reductase activity	1	0.176671	0.527231	0.483112	txnl1
GO:0008391	arachidonic acid monooxygenase activity	1	0.176671	0.527231	0.483112	cyp2k16
GO:0016405	CoA-ligase activity	1	0.176671	0.527231	0.483112	slc27a1b
GO:0016868	intramolecular transferase activity, phosphotransferases	1	0.176671	0.527231	0.483112	pgam1a
GO:0016881	acid-amino acid ligase activity	1	0.176671	0.527231	0.483112	fpgs
GO:0031078	histone deacetylase activity (H3-K14 specific)	1	0.176671	0.527231	0.483112	hdac10
GO:0032041	NAD-dependent histone deacetylase activity (H3-K14 specific)	1	0.176671	0.527231	0.483112	hdac10
GO:0042805	actinin binding	1	0.176671	0.527231	0.483112	mybpc1
GO:0043028	cysteine-type endopeptidase regulator activity involved in apoptotic process	1	0.176671	0.527231	0.483112	bcl2l1
GO:0051371	muscle alpha-actinin binding	1	0.176671	0.527231	0.483112	mybpc1
GO:0051393	alpha-actinin binding	1	0.176671	0.527231	0.483112	mybpc1
GO:1904680	peptide transmembrane transporter activity	1	0.176671	0.527231	0.483112	abcb4
GO:0003755	peptidyl-prolyl cis-trans isomerase activity	2	0.179509	0.527231	0.483112	ppiab/fkbp11
GO:0016830	carbon-carbon lyase activity	2	0.179509	0.527231	0.483112	odc1/amd1
GO:0005496	steroid binding	2	0.186458	0.527231	0.483112	apoa4b.3/apoa4b.1
GO:0016859	cis-trans isomerase activity	2	0.186458	0.527231	0.483112	ppiab/fkbp11
GO:0060589	nucleoside-triphosphatase regulator activity	7	0.186636	0.527231	0.483112	myo9aa/si:dkey-166d12.2/zgc:63863/si:dkey-91m11.5/myo9b/arhgap10/rasal3
GO:0044877	protein-containing complex binding	9	0.189655	0.527231	0.483112	si:ch211-66e2.3/myh7/gsna/scinlb/gmfb/mybpc1/smyd2a/cyr61l2/myo18aa
GO:0001067	regulatory region nucleic acid binding	8	0.190141	0.527231	0.483112	tefa/nfe2l2a/tefb/ciarta/dbpa/znf395b/dbpb/znf395a
GO:0044212	transcription regulatory region DNA binding	8	0.190141	0.527231	0.483112	tefa/nfe2l2a/tefb/ciarta/dbpa/znf395b/dbpb/znf395a
GO:0008514	organic anion transmembrane transporter activity	6	0.192019	0.527231	0.483112	slc26a6/slc38a4/slc43a2b/slc27a1b/slc26a3.1/slc25a1b
GO:0002020	protease binding	1	0.192527	0.527231	0.483112	timp2a
GO:0008252	nucleotidase activity	1	0.192527	0.527231	0.483112	nt5dc2
GO:0008253	5'-nucleotidase activity	1	0.192527	0.527231	0.483112	nt5dc2
GO:0030291	protein serine/threonine kinase inhibitor activity	1	0.192527	0.527231	0.483112	cdkn1a
GO:0031543	peptidyl-proline dioxygenase activity	1	0.192527	0.527231	0.483112	p4ha3
GO:0008375	acetylglucosaminyltransferase activity	2	0.193445	0.527231	0.483112	lfng/b3gnt5a
GO:0070405	ammonium ion binding	2	0.193445	0.527231	0.483112	apoa4b.3/apoa4b.1
GO:0016667	oxidoreductase activity, acting on a sulfur group of donors	2	0.200464	0.527917	0.48374	txnl1/msra
GO:0003707	steroid hormone receptor activity	3	0.204723	0.527917	0.48374	pparda/nr1d1/rorab
GO:0004185	serine-type carboxypeptidase activity	1	0.208078	0.527917	0.48374	cpn1
GO:0004602	glutathione peroxidase activity	1	0.208078	0.527917	0.48374	gpx8
GO:0009982	pseudouridine synthase activity	1	0.208078	0.527917	0.48374	pus7l
GO:0015299	solute:proton antiporter activity	1	0.208078	0.527917	0.48374	slc9a7
GO:0097493	structural molecule activity conferring elasticity	1	0.208078	0.527917	0.48374	mybpc1
GO:0008757	S-adenosylmethionine-dependent methyltransferase activity	4	0.220826	0.527917	0.48374	smyd2a/comta/comtb/emg1
GO:0004722	protein serine/threonine phosphatase activity	2	0.221683	0.527917	0.48374	rpap2/si:ch211-149b19.3
GO:0017016	Ras GTPase binding	7	0.221783	0.527917	0.48374	rab11fip4b/arhgef5/zgc:63863/ipo11/si:ch73-15b2.5/si:dkey-91m11.5/arhgef10lb
GO:0001540	amyloid-beta binding	1	0.223331	0.527917	0.48374	itm2bb
GO:0008199	ferric iron binding	1	0.223331	0.527917	0.48374	zgc:198419
GO:0010181	FMN binding	1	0.223331	0.527917	0.48374	ndor1
GO:0016628	oxidoreductase activity, acting on the CH-CH group of donors, NAD or NADP as acceptor	1	0.223331	0.527917	0.48374	fasn
GO:0017025	TBP-class protein binding	1	0.223331	0.527917	0.48374	brf1a
GO:0017136	NAD-dependent histone deacetylase activity	1	0.223331	0.527917	0.48374	hdac10
GO:0019955	cytokine binding	1	0.223331	0.527917	0.48374	ackr4a
GO:0030374	ligand-dependent nuclear receptor transcription coactivator activity	1	0.223331	0.527917	0.48374	si:dkey-97a13.6
GO:0031072	heat shock protein binding	1	0.223331	0.527917	0.48374	dnaja3a
GO:0015370	solute:sodium symporter activity	3	0.224807	0.527917	0.48374	slc20a1b/slc20a2/slc26a3.1
GO:0008237	metallopeptidase activity	5	0.226849	0.527917	0.48374	erap2/cpn1/acy1/bmp1a/c6ast4
GO:0042802	identical protein binding	5	0.233899	0.527917	0.48374	rab11fip4b/bcl2l1/igfbp7/si:dkey-237h12.3/zgc:136493
GO:0031267	small GTPase binding	7	0.235891	0.527917	0.48374	rab11fip4b/arhgef5/zgc:63863/ipo11/si:ch73-15b2.5/si:dkey-91m11.5/arhgef10lb
GO:0005254	chloride channel activity	2	0.235928	0.527917	0.48374	slc26a6/slc26a3.1
GO:0001105	RNA polymerase II transcription coactivator activity	1	0.238291	0.527917	0.48374	cited4a
GO:0001190	transcriptional activator activity, RNA polymerase II transcription factor binding	1	0.238291	0.527917	0.48374	cited4a
GO:0004312	fatty acid synthase activity	1	0.238291	0.527917	0.48374	fasn
GO:0005212	structural constituent of eye lens	1	0.238291	0.527917	0.48374	crygn1
GO:0016668	oxidoreductase activity, acting on a sulfur group of donors, NAD(P) as acceptor	1	0.238291	0.527917	0.48374	txnl1
GO:0016878	acid-thiol ligase activity	1	0.238291	0.527917	0.48374	slc27a1b
GO:0034979	NAD-dependent protein deacetylase activity	1	0.238291	0.527917	0.48374	hdac10
GO:0047617	acyl-CoA hydrolase activity	1	0.238291	0.527917	0.48374	acot17
GO:0070008	serine-type exopeptidase activity	1	0.238291	0.527917	0.48374	cpn1
GO:0017048	Rho GTPase binding	4	0.245589	0.527917	0.48374	arhgef5/si:ch73-15b2.5/si:dkey-91m11.5/arhgef10lb
GO:0042803	protein homodimerization activity	4	0.249776	0.527917	0.48374	rab11fip4b/bcl2l1/si:dkey-237h12.3/zgc:136493
GO:0016209	antioxidant activity	2	0.250221	0.527917	0.48374	gpx8/txnl1
GO:0042578	phosphoric ester hydrolase activity	9	0.25134	0.527917	0.48374	cnp/ptpn11b/rpap2/nt5dc2/plpp3/ptpn13/si:ch211-149b19.3/lpin1/pde9a
GO:0000993	RNA polymerase II core binding	1	0.252963	0.527917	0.48374	smyd2a
GO:0003995	acyl-CoA dehydrogenase activity	1	0.252963	0.527917	0.48374	acox1
GO:0008484	sulfuric ester hydrolase activity	1	0.252963	0.527917	0.48374	gnsb
GO:0008510	sodium:bicarbonate symporter activity	1	0.252963	0.527917	0.48374	slc26a3.1
GO:0008649	rRNA methyltransferase activity	1	0.252963	0.527917	0.48374	emg1
GO:0016289	CoA hydrolase activity	1	0.252963	0.527917	0.48374	acot17
GO:0022821	potassium ion antiporter activity	1	0.252963	0.527917	0.48374	slc9a7
GO:0042577	lipid phosphatase activity	1	0.252963	0.527917	0.48374	plpp3
GO:0140102	catalytic activity, acting on a rRNA	1	0.252963	0.527917	0.48374	emg1
GO:0016791	phosphatase activity	7	0.253197	0.527917	0.48374	ptpn11b/rpap2/nt5dc2/plpp3/ptpn13/si:ch211-149b19.3/lpin1
GO:0008235	metalloexopeptidase activity	2	0.257377	0.533429	0.488791	erap2/cpn1
GO:0008565	protein transporter activity	2	0.264537	0.533429	0.488791	abcb4/ipo11
GO:0001098	basal transcription machinery binding	1	0.267354	0.533429	0.488791	smyd2a
GO:0001099	basal RNA polymerase II transcription machinery binding	1	0.267354	0.533429	0.488791	smyd2a
GO:0004935	adrenergic receptor activity	1	0.267354	0.533429	0.488791	adrb2b
GO:0005527	macrolide binding	1	0.267354	0.533429	0.488791	fkbp11
GO:0005528	FK506 binding	1	0.267354	0.533429	0.488791	fkbp11
GO:0051087	chaperone binding	1	0.267354	0.533429	0.488791	bag3
GO:0097200	cysteine-type endopeptidase activity involved in execution phase of apoptosis	1	0.267354	0.533429	0.488791	casp8l1
GO:0003924	GTPase activity	8	0.270406	0.536244	0.491371	rab18a/rasd1/rab7/rhoca/rap1ab/opa1/si:dkey-13a21.4/hrasb
GO:0016627	oxidoreductase activity, acting on the CH-CH group of donors	2	0.271698	0.536244	0.491371	acox1/fasn
GO:0000977	RNA polymerase II regulatory region sequence-specific DNA binding	4	0.275195	0.536244	0.491371	tefa/tefb/dbpa/dbpb
GO:0001012	RNA polymerase II regulatory region DNA binding	4	0.275195	0.536244	0.491371	tefa/tefb/dbpa/dbpb
GO:0015081	sodium ion transmembrane transporter activity	4	0.275195	0.536244	0.491371	slc20a1b/slc9a7/slc20a2/slc26a3.1
GO:0008307	structural constituent of muscle	1	0.281468	0.545918	0.500235	mybpc1
GO:0004675	transmembrane receptor protein serine/threonine kinase activity	1	0.295312	0.562306	0.515252	tgfbr2b
GO:0016755	transferase activity, transferring amino-acyl groups	1	0.295312	0.562306	0.515252	qpct
GO:0016799	hydrolase activity, hydrolyzing N-glycosyl compounds	1	0.295312	0.562306	0.515252	neil1
GO:0071949	FAD binding	1	0.295312	0.562306	0.515252	acox1
GO:0016874	ligase activity	4	0.301018	0.564841	0.517575	naprt/fpgs/pcxa/slc27a1b
GO:0005319	lipid transporter activity	3	0.302676	0.564841	0.517575	apoa4b.3/apoa4b.1/slc27a1b
GO:0004601	peroxidase activity	1	0.308889	0.564841	0.517575	gpx8
GO:0004697	protein kinase C activity	1	0.308889	0.564841	0.517575	prkcq
GO:0016709	oxidoreductase activity, acting on paired donors, with incorporation or reduction of molecular oxygen, NAD(P)H as one donor, and incorporation of one atom of oxygen	1	0.308889	0.564841	0.517575	cyp27b1
GO:0016780	phosphotransferase activity, for other substituted phosphate groups	1	0.308889	0.564841	0.517575	chpt1
GO:0033293	monocarboxylic acid binding	1	0.308889	0.564841	0.517575	pcxa
GO:0043175	RNA polymerase core enzyme binding	1	0.308889	0.564841	0.517575	smyd2a
GO:0070063	RNA polymerase binding	1	0.308889	0.564841	0.517575	smyd2a
GO:0008509	anion transmembrane transporter activity	7	0.310189	0.564841	0.517575	slc26a6/aqp10a/slc38a4/slc43a2b/slc27a1b/slc26a3.1/slc25a1b
GO:0019901	protein kinase binding	2	0.314523	0.570244	0.522526	trib3/trib1
GO:0005253	anion channel activity	2	0.321616	0.571924	0.524065	slc26a6/slc26a3.1
GO:0016538	cyclin-dependent protein serine/threonine kinase regulator activity	1	0.322205	0.571924	0.524065	cdkn1a
GO:0031418	L-ascorbic acid binding	1	0.322205	0.571924	0.524065	p4ha3
GO:0032947	protein-containing complex scaffold activity	1	0.322205	0.571924	0.524065	slc9a3r1a
GO:0005543	phospholipid binding	5	0.322307	0.571924	0.524065	doc2d/apoa4b.3/apoa4b.1/opa1/snx17
GO:0004860	protein kinase inhibitor activity	2	0.328691	0.57833	0.529936	cdkn1a/socs1a
GO:0019210	kinase inhibitor activity	2	0.328691	0.57833	0.529936	cdkn1a/socs1a
GO:0003774	motor activity	4	0.331469	0.580768	0.532169	myo9aa/myh7/myo9b/myo18aa
GO:0004407	histone deacetylase activity	1	0.335266	0.583359	0.534543	hdac10
GO:0019900	kinase binding	2	0.335746	0.583359	0.534543	trib3/trib1
GO:0015108	chloride transmembrane transporter activity	2	0.342779	0.589751	0.5404	slc26a6/slc26a3.1
GO:0004702	signal transducer, downstream of receptor, with serine/threonine kinase activity	3	0.344864	0.589751	0.5404	tgfbr2b/si:ch211-171h4.3/map2k6
GO:0008536	Ran GTPase binding	1	0.348076	0.589751	0.5404	ipo11
GO:0015035	protein disulfide oxidoreductase activity	1	0.348076	0.589751	0.5404	txnl1
GO:0033558	protein deacetylase activity	1	0.348076	0.589751	0.5404	hdac10
GO:0097153	cysteine-type endopeptidase activity involved in apoptotic process	1	0.348076	0.589751	0.5404	casp8l1
GO:0042277	peptide binding	3	0.355394	0.589751	0.5404	erap2/itm2bb/lancl1
GO:0046982	protein heterodimerization activity	4	0.357698	0.589751	0.5404	bcl2l1/nfe2l2a/hist2h2l/si:dkey-237h12.3
GO:0001078	transcriptional repressor activity, RNA polymerase II proximal promoter sequence-specific DNA binding	1	0.360639	0.589751	0.5404	nr1d1
GO:0004181	metallocarboxypeptidase activity	1	0.360639	0.589751	0.5404	cpn1
GO:0008374	O-acyltransferase activity	1	0.360639	0.589751	0.5404	soat1
GO:0016620	oxidoreductase activity, acting on the aldehyde or oxo group of donors, NAD or NADP as acceptor	1	0.360639	0.589751	0.5404	aldh3a2b
GO:0019213	deacetylase activity	1	0.360639	0.589751	0.5404	hdac10
GO:0042813	Wnt-activated receptor activity	1	0.360639	0.589751	0.5404	egf
GO:0070006	metalloaminopeptidase activity	1	0.360639	0.589751	0.5404	erap2
GO:0051213	dioxygenase activity	2	0.363728	0.59248	0.542901	alox5b.3/p4ha3
GO:0016763	transferase activity, transferring pentosyl groups	2	0.370656	0.595881	0.546017	naprt/upp1
GO:0031625	ubiquitin protein ligase binding	2	0.370656	0.595881	0.546017	cul4a/cdc34b
GO:0044389	ubiquitin-like protein ligase binding	2	0.370656	0.595881	0.546017	cul4a/cdc34b
GO:0016877	ligase activity, forming carbon-sulfur bonds	1	0.372961	0.595881	0.546017	slc27a1b
GO:0050661	NADP binding	1	0.372961	0.595881	0.546017	ndor1
GO:0000149	SNARE binding	3	0.376382	0.596364	0.54646	doc2d/vamp5/napab
GO:0015294	solute:cation symporter activity	3	0.376382	0.596364	0.54646	slc20a1b/slc20a2/slc26a3.1
GO:0019905	syntaxin binding	2	0.377554	0.596364	0.54646	doc2d/napab
GO:0016684	oxidoreductase activity, acting on peroxide as acceptor	1	0.385047	0.605903	0.555201	gpx8
GO:0061630	ubiquitin protein ligase activity	4	0.388274	0.606405	0.555661	hectd1/cdc34b/nedd4l/lonrf1
GO:0061659	ubiquitin-like protein ligase activity	4	0.388274	0.606405	0.555661	hectd1/cdc34b/nedd4l/lonrf1
GO:0003954	NADH dehydrogenase activity	1	0.3969	0.614771	0.563327	narfl
GO:0051537	2 iron, 2 sulfur cluster binding	1	0.3969	0.614771	0.563327	fdx1
GO:0015171	amino acid transmembrane transporter activity	2	0.398053	0.614771	0.563327	slc38a4/slc43a2b
GO:0008146	sulfotransferase activity	2	0.404817	0.617228	0.565578	chst7/sult3st3
GO:0015103	inorganic anion transmembrane transporter activity	3	0.407584	0.617228	0.565578	slc26a6/aqp10a/slc26a3.1
GO:0004114	3',5'-cyclic-nucleotide phosphodiesterase activity	1	0.408525	0.617228	0.565578	pde9a
GO:0004364	glutathione transferase activity	1	0.408525	0.617228	0.565578	gstr
GO:0015175	neutral amino acid transmembrane transporter activity	1	0.408525	0.617228	0.565578	slc43a2b
GO:0015491	cation:cation antiporter activity	1	0.408525	0.617228	0.565578	slc9a7
GO:0016798	hydrolase activity, acting on glycosyl bonds	3	0.412742	0.621348	0.569353	neil1/zgc:92137/lyz
GO:0005085	guanyl-nucleotide exchange factor activity	4	0.414332	0.621498	0.569491	arhgef5/si:ch73-15b2.5/si:dkey-91m11.5/arhgef10lb
GO:0017147	Wnt-protein binding	1	0.419927	0.627632	0.575112	egf
GO:0008289	lipid binding	7	0.425973	0.633877	0.580834	doc2d/apoa4b.3/rbp5/apoa4b.1/opa1/snx17/si:ch73-233k15.2
GO:0005057	signal transducer activity, downstream of receptor	3	0.428128	0.633877	0.580834	tgfbr2b/si:ch211-171h4.3/map2k6
GO:0015298	solute:cation antiporter activity	1	0.431109	0.633877	0.580834	slc9a7
GO:0019239	deaminase activity	1	0.431109	0.633877	0.580834	gda
GO:0046983	protein dimerization activity	9	0.433086	0.633877	0.580834	rab11fip4b/bcl2l1/ahr1a/nfe2l2a/hist2h2l/mnta/bhlhe41/si:dkey-237h12.3/zgc:136493
GO:0008083	growth factor activity	3	0.433226	0.633877	0.580834	egf/inhbab/hbegfa
GO:0015291	secondary active transmembrane transporter activity	5	0.440254	0.637876	0.584498	slc26a6/slc20a1b/slc9a7/slc20a2/slc26a3.1
GO:0001227	transcriptional repressor activity, RNA polymerase II transcription regulatory region sequence-specific DNA binding	1	0.442077	0.637876	0.584498	nr1d1
GO:0004180	carboxypeptidase activity	1	0.442077	0.637876	0.584498	cpn1
GO:0008373	sialyltransferase activity	1	0.442077	0.637876	0.584498	st6galnac5b
GO:0016706	oxidoreductase activity, acting on paired donors, with incorporation or reduction of molecular oxygen, 2-oxoglutarate as one donor, and incorporation of one atom each of oxygen into both donors	1	0.452834	0.647521	0.593337	p4ha3
GO:0035591	signaling adaptor activity	1	0.452834	0.647521	0.593337	eps8a
GO:0051020	GTPase binding	7	0.454149	0.647521	0.593337	rab11fip4b/arhgef5/zgc:63863/ipo11/si:ch73-15b2.5/si:dkey-91m11.5/arhgef10lb
GO:0004175	endopeptidase activity	9	0.454973	0.647521	0.593337	casp8l1/ctsla/ctsc/zgc:92511/cfd/zgc:162184/bmp1a/c6ast4/zgc:136872
GO:0008378	galactosyltransferase activity	1	0.463384	0.651374	0.596867	b3gnt5a
GO:0015036	disulfide oxidoreductase activity	1	0.463384	0.651374	0.596867	txnl1
GO:0031406	carboxylic acid binding	2	0.463928	0.651374	0.596867	pcxa/p4ha3
GO:0043177	organic acid binding	2	0.463928	0.651374	0.596867	pcxa/p4ha3
GO:0016814	hydrolase activity, acting on carbon-nitrogen (but not peptide) bonds, in cyclic amidines	1	0.473731	0.660689	0.605402	gda
GO:0031624	ubiquitin conjugating enzyme binding	1	0.473731	0.660689	0.605402	lonrf1
GO:0030246	carbohydrate binding	4	0.48237	0.665934	0.610208	enpp1/p4ha3/zgc:174904/stbd1
GO:0004683	calmodulin-dependent protein kinase activity	1	0.48388	0.665934	0.610208	camk1ga
GO:0019843	rRNA binding	1	0.48388	0.665934	0.610208	emg1
GO:0044390	ubiquitin-like protein conjugating enzyme binding	1	0.48388	0.665934	0.610208	lonrf1
GO:0004177	aminopeptidase activity	1	0.493833	0.666188	0.610441	erap2
GO:0008408	3'-5' exonuclease activity	1	0.493833	0.666188	0.610441	exd3
GO:0016903	oxidoreductase activity, acting on the aldehyde or oxo group of donors	1	0.493833	0.666188	0.610441	aldh3a2b
GO:0043130	ubiquitin binding	1	0.493833	0.666188	0.610441	sharpin
GO:0048029	monosaccharide binding	1	0.493833	0.666188	0.610441	p4ha3
GO:1901618	organic hydroxy compound transmembrane transporter activity	1	0.493833	0.666188	0.610441	aqp10a
GO:0008081	phosphoric diester hydrolase activity	2	0.495248	0.666188	0.610441	cnp/pde9a
GO:0008238	exopeptidase activity	2	0.501372	0.670924	0.61478	erap2/cpn1
GO:0015293	symporter activity	3	0.502591	0.670924	0.61478	slc20a1b/slc20a2/slc26a3.1
GO:0015144	carbohydrate transmembrane transporter activity	1	0.503595	0.670924	0.61478	aqp10a
GO:0016782	transferase activity, transferring sulfur-containing groups	2	0.507447	0.673903	0.617511	chst7/sult3st3
GO:0004721	phosphoprotein phosphatase activity	4	0.511171	0.676693	0.620067	ptpn11b/rpap2/ptpn13/si:ch211-149b19.3
GO:0008201	heparin binding	1	0.513169	0.677188	0.620521	cyr61l2
GO:0022804	active transmembrane transporter activity	7	0.521611	0.686157	0.628739	slc26a6/abcb4/slc20a1b/slc9a7/slc20a2/abca1a/slc26a3.1
GO:0005160	transforming growth factor beta receptor binding	1	0.531768	0.692961	0.634973	inhbab
GO:0016417	S-acyltransferase activity	1	0.531768	0.692961	0.634973	fasn
GO:0018024	histone-lysine N-methyltransferase activity	1	0.531768	0.692961	0.634973	smyd2a
GO:0017137	Rab GTPase binding	2	0.537094	0.69772	0.639335	rab11fip4b/zgc:63863
GO:0004842	ubiquitin-protein transferase activity	6	0.542317	0.702317	0.643547	hectd1/mycbp2/cdc34b/nedd4l/lonrf1/sharpin
GO:0000287	magnesium ion binding	2	0.554284	0.715593	0.655712	comta/comtb
GO:0004553	hydrolase activity, hydrolyzing O-glycosyl compounds	2	0.559913	0.720629	0.660327	zgc:92137/lyz
GO:0030545	receptor regulator activity	6	0.564416	0.720683	0.660376	ins/sst1.1/egf/gcga/inhbab/hbegfa
GO:0048018	receptor ligand activity	6	0.564416	0.720683	0.660376	ins/sst1.1/egf/gcga/inhbab/hbegfa
GO:0015179	L-amino acid transmembrane transporter activity	1	0.566868	0.720683	0.660376	slc43a2b
GO:0032182	ubiquitin-like protein binding	1	0.566868	0.720683	0.660376	sharpin
GO:0005507	copper ion binding	1	0.575226	0.728481	0.667521	hephl1a
GO:0015078	proton transmembrane transporter activity	2	0.576496	0.728481	0.667521	hvcn1/slc9a7
GO:0019787	ubiquitin-like protein transferase activity	6	0.579887	0.728972	0.667972	hectd1/mycbp2/cdc34b/nedd4l/lonrf1/sharpin
GO:0008028	monocarboxylic acid transmembrane transporter activity	1	0.583422	0.728972	0.667972	slc27a1b
GO:0019887	protein kinase regulator activity	2	0.587295	0.728972	0.667972	cdkn1a/socs1a
GO:0001104	RNA polymerase II transcription cofactor activity	1	0.591461	0.728972	0.667972	cited4a
GO:0005484	SNAP receptor activity	1	0.591461	0.728972	0.667972	vamp5
GO:0016278	lysine N-methyltransferase activity	1	0.591461	0.728972	0.667972	smyd2a
GO:0016279	protein-lysine N-methyltransferase activity	1	0.591461	0.728972	0.667972	smyd2a
GO:0051287	NAD binding	1	0.591461	0.728972	0.667972	zgc:136493
GO:0004222	metalloendopeptidase activity	2	0.592618	0.728972	0.667972	bmp1a/c6ast4
GO:0005544	calcium-dependent phospholipid binding	1	0.607077	0.742378	0.680256	doc2d
GO:0008173	RNA methyltransferase activity	1	0.607077	0.742378	0.680256	emg1
GO:0005201	extracellular matrix structural constituent	1	0.61466	0.749454	0.68674	col5a1
GO:0004527	exonuclease activity	1	0.622098	0.749876	0.687126	exd3
GO:0070851	growth factor receptor binding	1	0.622098	0.749876	0.687126	hbegfa
GO:0003729	mRNA binding	2	0.623479	0.749876	0.687126	ncbp2/esrp2
GO:0019207	kinase regulator activity	2	0.628443	0.749876	0.687126	cdkn1a/socs1a
GO:0004715	non-membrane spanning protein tyrosine kinase activity	1	0.629392	0.749876	0.687126	csk
GO:0030170	pyridoxal phosphate binding	1	0.629392	0.749876	0.687126	cbsb
GO:0060090	molecular adaptor activity	1	0.629392	0.749876	0.687126	eps8a
GO:0070279	vitamin B6 binding	1	0.629392	0.749876	0.687126	cbsb
GO:0042054	histone methyltransferase activity	1	0.636546	0.756239	0.692956	smyd2a
GO:0008194	UDP-glycosyltransferase activity	2	0.643032	0.761773	0.698028	lfng/b3gnt5a
GO:0016746	transferase activity, transferring acyl groups	4	0.649235	0.766943	0.702765	cpt1b/fasn/soat1/qpct
GO:0016765	transferase activity, transferring alkyl or aryl (other than methyl) groups	1	0.657193	0.77197	0.707371	gstr
GO:0030276	clathrin binding	1	0.657193	0.77197	0.707371	doc2d
GO:0042626	ATPase activity, coupled to transmembrane movement of substances	2	0.661777	0.775171	0.710304	abcb4/abca1a
GO:0004725	protein tyrosine phosphatase activity	2	0.684088	0.79461	0.728116	ptpn11b/ptpn13
GO:0015399	primary active transmembrane transporter activity	2	0.684088	0.79461	0.728116	abcb4/abca1a
GO:0015405	P-P-bond-hydrolysis-driven transmembrane transporter activity	2	0.684088	0.79461	0.728116	abcb4/abca1a
GO:0005539	glycosaminoglycan binding	1	0.695043	0.805091	0.737721	cyr61l2
GO:0042393	histone binding	1	0.700933	0.809665	0.741912	tp53bp1
GO:0099528	G-protein coupled neurotransmitter receptor activity	1	0.70671	0.814083	0.74596	hrh3
GO:0009055	electron transfer activity	1	0.712375	0.818348	0.749868	fdx1
GO:0008528	G-protein coupled peptide receptor activity	2	0.725093	0.825581	0.756496	ackr4a/cxcr4b
GO:0001076	transcription factor activity, RNA polymerase II transcription factor binding	1	0.728725	0.825581	0.756496	cited4a
GO:0043492	ATPase activity, coupled to movement of substances	2	0.728937	0.825581	0.756496	abcb4/abca1a
GO:0001883	purine nucleoside binding	8	0.736391	0.825581	0.756496	rab18a/rasd1/rab7/rhoca/rap1ab/opa1/si:dkey-13a21.4/hrasb
GO:0005525	GTP binding	8	0.736391	0.825581	0.756496	rab18a/rasd1/rab7/rhoca/rap1ab/opa1/si:dkey-13a21.4/hrasb
GO:0032550	purine ribonucleoside binding	8	0.736391	0.825581	0.756496	rab18a/rasd1/rab7/rhoca/rap1ab/opa1/si:dkey-13a21.4/hrasb
GO:0008170	N-methyltransferase activity	1	0.739107	0.825581	0.756496	smyd2a
GO:0001653	peptide receptor activity	2	0.740194	0.825581	0.756496	ackr4a/cxcr4b
GO:0008236	serine-type peptidase activity	3	0.743496	0.825581	0.756496	cpn1/zgc:92511/cfd
GO:0004518	nuclease activity	2	0.743858	0.825581	0.756496	exd3/neil1
GO:0008276	protein methyltransferase activity	1	0.744148	0.825581	0.756496	smyd2a
GO:0051082	unfolded protein binding	1	0.744148	0.825581	0.756496	dnaja3a
GO:0032549	ribonucleoside binding	8	0.74441	0.825581	0.756496	rab18a/rasd1/rab7/rhoca/rap1ab/opa1/si:dkey-13a21.4/hrasb
GO:0001882	nucleoside binding	8	0.746389	0.825581	0.756496	rab18a/rasd1/rab7/rhoca/rap1ab/opa1/si:dkey-13a21.4/hrasb
GO:0017171	serine hydrolase activity	3	0.749537	0.826871	0.757678	cpn1/zgc:92511/cfd
GO:0036459	thiol-dependent ubiquitinyl hydrolase activity	1	0.753941	0.828211	0.758906	usp2b
GO:0005516	calmodulin binding	1	0.758697	0.828211	0.758906	camk1ga
GO:0015238	drug transmembrane transporter activity	1	0.758697	0.828211	0.758906	slc25a1b
GO:0101005	ubiquitinyl hydrolase activity	1	0.758697	0.828211	0.758906	usp2b
GO:0019783	ubiquitin-like protein-specific protease activity	1	0.77682	0.84578	0.775005	usp2b
GO:0016407	acetyltransferase activity	1	0.789516	0.857365	0.78562	fasn
GO:0008017	microtubule binding	2	0.799649	0.86586	0.793404	eml3/opa1
GO:0004519	endonuclease activity	1	0.801491	0.86586	0.793404	neil1
GO:0016757	transferase activity, transferring glycosyl groups	5	0.805117	0.867529	0.794934	lfng/b3gnt5a/naprt/st6galnac5b/upp1
GO:0008227	G-protein coupled amine receptor activity	2	0.837237	0.899814	0.824518	adrb2b/hrh3
GO:0003682	chromatin binding	2	0.842055	0.902666	0.82713	per2/nupr1b
GO:0015077	monovalent inorganic cation transmembrane transporter activity	5	0.852987	0.910297	0.834123	slc20a1b/hvcn1/slc9a7/slc20a2/slc26a3.1
GO:0004252	serine-type endopeptidase activity	2	0.85354	0.910297	0.834123	zgc:92511/cfd
GO:0015631	tubulin binding	2	0.855744	0.910319	0.834143	eml3/opa1
GO:0016747	transferase activity, transferring acyl groups other than amino-acyl groups	2	0.86426	0.917039	0.840301	fasn/soat1
GO:0008134	transcription factor binding	1	0.873354	0.924337	0.846988	brf1a
GO:0035091	phosphatidylinositol binding	1	0.893796	0.943577	0.864618	snx17
GO:0005125	cytokine activity	1	0.917654	0.966317	0.885455	inhbab
GO:0016758	transferase activity, transferring hexosyl groups	2	0.927304	0.973972	0.89247	lfng/b3gnt5a
GO:0030594	neurotransmitter receptor activity	1	0.929595	0.973972	0.89247	hrh3
GO:0140097	catalytic activity, acting on DNA	1	0.934901	0.977077	0.895315	neil1
GO:0015267	channel activity	5	0.943218	0.978441	0.896565	slc26a6/hvcn1/aqp10a/aqp8a.1/slc26a3.1
GO:0022803	passive transmembrane transporter activity	5	0.943218	0.978441	0.896565	slc26a6/hvcn1/aqp10a/aqp8a.1/slc26a3.1
GO:0005126	cytokine receptor binding	1	0.943246	0.978441	0.896565	inhbab
GO:0022843	voltage-gated cation channel activity	1	0.949544	0.98253	0.900312	hvcn1
GO:0001664	G-protein coupled receptor binding	1	0.952426	0.983074	0.90081	gcga
GO:0015079	potassium ion transmembrane transporter activity	1	0.965244	0.990936	0.908014	slc9a7
GO:0046873	metal ion transmembrane transporter activity	4	0.965803	0.990936	0.908014	slc20a1b/slc9a7/slc20a2/slc26a3.1
GO:0022838	substrate-specific channel activity	4	0.967172	0.990936	0.908014	slc26a6/hvcn1/aqp8a.1/slc26a3.1
GO:0005244	voltage-gated ion channel activity	1	0.973598	0.994182	0.910989	hvcn1
GO:0022832	voltage-gated channel activity	1	0.975109	0.994182	0.910989	hvcn1
GO:0042623	ATPase activity, coupled	2	0.98176	0.998022	0.914507	abcb4/abca1a
GO:0005198	structural molecule activity	4	0.983662	0.998022	0.914507	col5a1/slc9a3r1a/mybpc1/crygn1
GO:0005216	ion channel activity	3	0.988764	0.998229	0.914697	slc26a6/hvcn1/slc26a3.1
GO:0016887	ATPase activity	2	0.994805	0.998229	0.914697	abcb4/abca1a
GO:0140098	catalytic activity, acting on RNA	1	0.996531	0.998229	0.914697	emg1
GO:0005261	cation channel activity	1	0.997664	0.998229	0.914697	hvcn1
GO:0022839	ion gated channel activity	1	0.998006	0.998229	0.914697	hvcn1
GO:0022836	gated channel activity	1	0.998229	0.998229	0.914697	hvcn1

## Sheet: KEGG HARA F0F1
	Description	Count	pvalue	p.adjust	qvalue	geneID
dre03008	Ribosome biogenesis in eukaryotes	35	3.68113e-14	5.26402e-12	4.88234e-12	100003787/266990/30428/30502/317637/321058/321114/321745/321897/323426/323464/334362/334446/368478/386850/393107/393237/393617/393950/394196/406268/406275/406805/407084/415208/436798/494152/541421/541444/553241/553498/553787/613144/678588/793727
dre03013	RNA transport	43	2.12643e-08	1.52039e-06	1.41016e-06	100000842/100005893/192325/322256/322599/322969/324365/336613/368664/373077/386634/393273/393732/393856/393929/394053/403025/406398/406438/406491/406823/406852/415150/436798/445110/445302/492482/492652/503767/541421/541444/550549/553787/556273/558020/558883/561194/567151/572435/767677/79380/799538/799566
dre03040	Spliceosome	33	1.03879e-05	0.000495157	0.000459255	100005893/192325/192331/286774/321114/321555/321860/322206/324121/327336/334490/336645/373077/393476/393480/393889/394053/402989/406264/406288/406495/406691/406824/436946/445302/445383/446168/449780/503767/550373/560210/570994/572679
dre03020	RNA polymerase	9	0.00367854	0.0914894	0.0848558	325603/327078/402856/436749/445412/449992/553347/562329/796803
dre00230	Purine metabolism	35	0.00406997	0.0914894	0.0848558	100330772/100331745/140620/192305/317745/322229/325603/327078/333997/334431/338306/393641/402856/405822/406259/415176/415208/436595/436749/445412/449992/494056/550502/553347/553701/560486/560807/562329/562399/565706/571834/572027/791647/796803/799942
dre00620	Pyruvate metabolism	12	0.00425644	0.0914894	0.0848558	100536873/30496/30497/334197/335715/336977/406405/406428/406702/447920/492719/541435
dre00830	Retinol metabolism	11	0.00484718	0.0914894	0.0848558	116713/140634/378722/393580/450050/553239/563241/570457/570913/777751/84039
dre04120	Ubiquitin mediated proteolysis	27	0.00511829	0.0914894	0.0848558	100000479/100001302/100003587/100004133/170784/321832/323883/324015/324655/334133/334373/336088/336598/368425/373108/393933/393934/394085/406335/406712/406816/559634/564991/565498/567370/572370/797853
dre00270	Cysteine and methionine metabolism	11	0.019308	0.287223	0.266397	266987/30496/30497/335715/394009/406405/431773/561410/678634/791612/792097
dre00330	Arginine and proline metabolism	13	0.0200855	0.287223	0.266397	322614/334197/394009/394133/436827/447920/555401/556522/558050/564675/564694/565385/792097
dre04910	Insulin signaling pathway	28	0.0232467	0.302207	0.280295	100002263/245697/245698/30081/30380/327510/373121/378972/393732/393807/393937/403051/406660/445118/550549/554046/556199/556286/562011/562062/565379/567524/568316/570761/751668/79380/799566/799867
dre00052	Galactose metabolism	8	0.0281329	0.33525	0.310942	100332784/100536353/405822/445118/550259/553452/555748/751668
dre00983	Drug metabolism - other enzymes	13	0.0362318	0.398163	0.369294	100144569/103910413/317745/327057/338306/406259/492500/503707/553169/560486/570913/571365/723997
dre00982	Drug metabolism - cytochrome P450	8	0.038981	0.398163	0.369294	492500/553169/558050/570457/570913/571365/723997/794311
dre00500	Starch and sucrose metabolism	8	0.0453274	0.410758	0.380975	100332784/100536353/403051/405822/445118/555748/562399/751668
dre00240	Pyrimidine metabolism	18	0.047931	0.410758	0.380975	100144569/103910413/322089/325603/327057/327078/402856/436595/436749/445412/449992/503707/553347/562329/562399/571834/791647/796803
dre05168	Herpes simplex infection	29	0.0493747	0.410758	0.380975	100151347/140633/30428/30502/30762/30768/323883/368614/368615/368771/393287/393426/393933/403013/406204/406264/406288/406471/406691/406816/553347/560745/560816/562867/563926/565612/565774/566841/567111
dre00380	Tryptophan metabolism	10	0.0517038	0.410758	0.380975	100000859/140634/334197/393315/406651/447920/550372/555401/558050/570457
dre00520	Amino sugar and nucleotide sugar metabolism	11	0.0593532	0.42871	0.397626	100148292/116991/322468/336553/393461/405822/406338/406819/550565/555748/751668
dre00980	Metabolism of xenobiotics by cytochrome P450	8	0.0599595	0.42871	0.397626	140634/337696/373866/492500/553169/570913/571365/723997
dre00053	Ascorbate and aldarate metabolism	5	0.0682325	0.464631	0.430942	116991/334197/447920/570913/571850
dre03015	mRNA surveillance pathway	15	0.075479	0.490613	0.455041	100005893/192325/266989/324554/327069/393856/393929/394053/403025/449009/449548/503767/561459/566032/570858
dre04330	Notch signaling pathway	11	0.0800944	0.494441	0.458591	101886283/140421/192302/334026/386808/561503/565612/566841/567111/58066/794892
dre04141	Protein processing in endoplasmic reticulum	27	0.0829832	0.494441	0.458591	100000479/100002072/170784/321832/322863/323883/324005/324015/324855/334133/334337/338155/360149/373100/386709/393934/394028/394085/406768/406816/492805/553627/554960/559775/560210/791986/83414
dre00010	Glycolysis / Gluconeogenesis	13	0.0924979	0.515548	0.478167	30496/30497/323107/334197/405822/406428/406702/445118/447920/541435/550259/561891/751668
dre00410	beta-Alanine metabolism	7	0.0950612	0.515548	0.478167	100000859/100037349/100144569/334197/394009/447920/564675
dre03050	Proteasome	10	0.0973412	0.515548	0.478167	30387/30649/321585/322265/393261/415221/503934/550287/553346/83917
dre00040	Pentose and glucuronate interconversions	5	0.111926	0.565464	0.524464	116991/550282/553452/555748/570913
dre00790	Folate biosynthesis	6	0.117697	0.565464	0.524464	337696/373866/406746/553452/566323/793471
dre00590	Arachidonic acid metabolism	9	0.118629	0.565464	0.524464	100034406/337696/373866/393108/402802/406449/415227/556280/569734
dre00561	Glycerolipid metabolism	11	0.133625	0.616399	0.571706	101887155/334197/334270/436610/436958/447920/450063/553380/553452/557680/559124
dre00340	Histidine metabolism	5	0.146938	0.639607	0.593232	334197/402826/447920/555401/558050
dre02010	ABC transporters	7	0.147602	0.639607	0.593232	100151075/336147/368771/393561/564067/564344/566515
dre00250	Alanine, aspartate and glutamate metabolism	7	0.162524	0.683556	0.633994	192305/334431/373092/394133/394138/550502/572027
dre00020	Citrate cycle (TCA cycle)	6	0.182824	0.726218	0.673563	335715/406405/406428/406702/436922/568448
dre00350	Tyrosine metabolism	6	0.182824	0.726218	0.673563	406651/553762/558050/561372/561410/570457
dre04623	Cytosolic DNA-sensing pathway	7	0.194261	0.750793	0.696355	393287/436749/445412/562329/562867/57933/796803
dre00770	Pantothenate and CoA biosynthesis	3	0.207351	0.763137	0.707805	100144569/561272/562399
dre04520	Adherens junction	14	0.208128	0.763137	0.707805	100002928/100150664/30081/30428/30502/30639/30739/553341/560816/565612/566841/567111/58092/799867
dre00480	Glutathione metabolism	9	0.222605	0.795814	0.738113	322533/324900/394009/492500/553169/553575/569734/571365/723997
dre03410	Base excision repair	6	0.239105	0.833953	0.773486	335495/393253/553789/558045/563276/571834
dre00260	Glycine, serine and threonine metabolism	7	0.264027	0.880602	0.816753	100331020/266987/323107/334197/403338/558050/565385
dre00360	Phenylalanine metabolism	3	0.270954	0.880602	0.816753	406651/558050/561410
dre00450	Selenocompound metabolism	3	0.270954	0.880602	0.816753	324947/338183/393315
dre00640	Propanoate metabolism	5	0.295969	0.914584	0.848271	100000859/100037349/30496/30497/541435
dre00760	Nicotinate and nicotinamide metabolism	5	0.295969	0.914584	0.848271	100330160/393330/562399/570457/791647
dre00970	Aminoacyl-tRNA biosynthesis	9	0.300598	0.914584	0.848271	327329/337070/338183/368235/368284/394188/445405/447847/568332
dre04920	Adipocytokine signaling pathway	12	0.337419	0.980469	0.909379	30530/30767/378972/393287/393426/406471/406821/436636/445118/555578/568316/570761
dre04137	Mitophagy - animal	11	0.341634	0.980469	0.909379	100009663/114401/30380/30428/30502/323563/327143/336159/494085/567448/792181
dre00630	Glyoxylate and dicarboxylate metabolism	5	0.342821	0.980469	0.909379	335715/406405/550372/568448/792824
dre04933	AGE-RAGE signaling pathway in diabetic complications	16	0.357739	1	0.927494	100002263/100150844/30380/30498/30639/30739/30767/30768/369197/378972/497384/555604/558154/568288/569040/58092
dre00600	Sphingolipid metabolism	8	0.372551	1	0.927494	100037312/259251/493602/557680/558496/559124/559240/791197
dre04142	Lysosome	18	0.394118	1	0.927494	100329505/100332784/266798/282673/321453/327635/336746/368911/406625/406713/553423/554157/560126/563359/564342/569719/798361/799153
dre03018	RNA degradation	11	0.402021	1	0.927494	100003553/317641/373085/393712/393856/394064/406795/448949/550234/550259/568176
dre04625	C-type lectin receptor signaling pathway	15	0.414429	1	0.927494	100002263/100150844/259196/30380/30768/378972/393287/393426/403013/406660/561595/564337/571242/57933/795414
dre00120	Primary bile acid biosynthesis	3	0.433138	1	0.927494	327462/553543/570455
dre00591	Linoleic acid metabolism	3	0.433138	1	0.927494	100034406/393108/402802
dre04340	Hedgehog signaling pathway	7	0.436626	1	0.927494	323883/324655/334373/394099/406816/541318/572370
dre00140	Steroid hormone biosynthesis	5	0.437171	1	0.927494	140634/393335/561372/570455/570913
dre04068	FoxO signaling pathway	20	0.437646	1	0.927494	100002263/100151416/30380/30639/30739/30767/321974/378972/393287/445118/556286/559050/564523/565109/565612/566841/567111/568316/570761/58092
dre00531	Glycosaminoglycan degradation	3	0.464353	1	0.927494	100329505/327635/560126
dre00564	Glycerophospholipid metabolism	12	0.481873	1	0.927494	114549/393421/402802/436958/553380/557680/558499/559124/560986/563589/565971/793137
dre00430	Taurine and hypotaurine metabolism	2	0.484092	1	0.927494	492476/569734
dre03450	Non-homologous end-joining	2	0.484092	1	0.927494	334488/562283
dre00730	Thiamine metabolism	2	0.52183	1	0.927494	450054/541489
dre01200	Carbon metabolism	15	0.529849	1	0.927494	100000859/140620/323107/335715/373092/406405/406428/406702/445288/492719/541435/550259/568448/751668/792824
dre04350	TGF-beta signaling pathway	12	0.5386	1	0.927494	266599/30639/30739/321364/323883/406813/406816/449548/565612/566841/567111/58092
dre04210	Apoptosis	19	0.557956	1	0.927494	100002263/100002293/114401/195815/30380/321453/335495/336746/337223/373108/378972/393287/406471/406768/436904/553383/554157/558045/558237
dre04012	ErbB signaling pathway	12	0.566188	1	0.927494	100002263/100151416/30380/369197/378972/497384/556286/562011/562064/564584/791855/799566
dre04530	Tight junction	24	0.590985	1	0.927494	100005752/100329719/114446/317747/327272/334086/335865/337223/406493/406714/415242/449548/497648/555454/556734/559634/561431/563056/565446/567621/568316/570761/570858/573644
dre00565	Ether lipid metabolism	5	0.591881	1	0.927494	402802/406470/445504/557680/559124
dre04217	Necroptosis	20	0.600816	1	0.927494	100038774/30767/30768/335495/368519/369197/373092/373108/393186/393880/403013/403051/406471/406766/406768/558045/561595/562064/57933/791855
dre04621	NOD-like receptor signaling pathway	17	0.601832	1	0.927494	100150844/100330160/114401/30768/368359/373108/393186/393287/393890/403013/445223/557086/561595/562867/567448/57933/777696
dre00280	Valine, leucine and isoleucine degradation	6	0.606539	1	0.927494	100000859/334197/394135/445288/447920/570457
dre04916	Melanogenesis	15	0.614795	1	0.927494	30380/327650/336421/406660/406853/497384/553179/553700/560807/562064/565612/566841/567111/573207/791855
dre00670	One carbon pool by folate	2	0.623463	1	0.927494	100004977/100526683
dre01230	Biosynthesis of amino acids	9	0.669545	1	0.927494	140620/266987/322614/323107/550259/561410/568448/678634/791612
dre00100	Steroid biosynthesis	2	0.681422	1	0.927494	406713/494102
dre04146	Peroxisome	9	0.683037	1	0.927494	100000859/100003383/100037349/436840/560486/563199/563203/565385/792998
dre03320	PPAR signaling pathway	7	0.697528	1	0.927494	100000859/30530/393543/436636/553512/555578/58128
dre04130	SNARE interactions in vesicular transport	4	0.719244	1	0.927494	114464/325484/393159/550577
dre04672	Intestinal immune network for IgA production	4	0.719244	1	0.927494	30762/368614/368615/553366
dre00860	Porphyrin and chlorophyll metabolism	3	0.721793	1	0.927494	570913/58016/791518
dre04136	Autophagy - other	3	0.721793	1	0.927494	100009663/336632/393405
dre04110	Cell cycle	14	0.726268	1	0.927494	100151416/192302/30639/323883/406419/406813/406816/562283/563669/565612/566841/567111/567168/58092
dre03060	Protein export	2	0.731878	1	0.927494	393963/791986
dre03430	Mismatch repair	2	0.731878	1	0.927494	260437/571834
dre00130	Ubiquinone and other terpenoid-quinone biosynthesis	1	0.735175	1	0.927494	561410
dre04371	Apelin signaling pathway	18	0.738603	1	0.927494	140421/30380/30498/30639/322104/327650/336421/378972/406598/406660/560807/568316/570761/571106/58066/58092/798375/798565
dre00030	Pentose phosphate pathway	3	0.741339	1	0.927494	140620/405822/550259
dre04510	Focal adhesion	25	0.750572	1	0.927494	100002263/100004299/100150664/286832/317747/321107/373108/378972/393543/406493/406714/415240/415242/494453/497384/503730/556286/556413/556734/558154/562011/568309/570218/570868/796537
dre04115	p53 signaling pathway	7	0.751941	1	0.927494	100004133/100151416/171473/403079/494479/553652/567524
dre00511	Other glycan degradation	2	0.775378	1	0.927494	335494/559240
dre00650	Butanoate metabolism	2	0.775378	1	0.927494	100000859/445288
dre04370	VEGF signaling pathway	7	0.776382	1	0.927494	100002263/30380/378972/497384/558154/562011/564337
dre00071	Fatty acid degradation	4	0.78383	1	0.927494	100000859/334197/445288/447920
dre05132	Salmonella infection	9	0.788662	1	0.927494	317747/321383/336933/393928/394235/556104/560840/561612/57933
dre04310	Wnt signaling pathway	17	0.791399	1	0.927494	118437/30428/30502/317679/317747/323883/334373/406816/497384/560060/562064/564337/565612/566841/567111/58117/791855
dre00220	Arginine biosynthesis	2	0.794724	1	0.927494	322614/373092
dre04810	Regulation of actin cytoskeleton	26	0.801518	1	0.927494	100002263/100002928/100004299/30380/317747/321099/321383/323285/336613/352940/394235/406363/406493/449831/556104/556286/556413/556734/557797/560360/563030/567621/568309/570218/570868/735292
dre00562	Inositol phosphate metabolism	8	0.808462	1	0.927494	100002263/406598/449831/560360/561891/568288/569040/571850
dre04145	Phagosome	15	0.808678	1	0.927494	114464/30762/321453/337223/368614/368615/368771/378966/387260/436636/554157/556734/557797/561612/791986
dre04218	Cellular senescence	18	0.808963	1	0.927494	100002263/100038774/100151416/30380/30639/30739/321726/334373/378972/393186/403079/406660/406768/564337/567524/58092/65239/799566
dre04512	ECM-receptor interaction	7	0.847892	1	0.927494	286832/436636/503730/556734/565373/565429/570868
dre03022	Basal transcription factors	3	0.849044	1	0.927494	323239/334854/415217
dre00310	Lysine degradation	6	0.861059	1	0.927494	100000859/334197/393876/447920/556077/664754
dre04912	GnRH signaling pathway	11	0.863009	1	0.927494	100150844/245950/30380/30498/406660/497384/556286/560807/562064/65239/791855
dre00512	Mucin type O-glycan biosynthesis	2	0.870872	1	0.927494	559073/570248
dre00510	N-Glycan biosynthesis	4	0.877239	1	0.927494	393649/431727/553725/724006
dre00051	Fructose and mannose metabolism	3	0.881737	1	0.927494	393461/550259/553452
dre00592	alpha-Linolenic acid metabolism	1	0.886459	1	0.927494	402802
dre03420	Nucleotide excision repair	3	0.891145	1	0.927494	100004133/323239/571834
dre04514	Cell adhesion molecules (CAMs)	12	0.891862	1	0.927494	282667/30291/30762/368614/368615/556734/557797/560816/563598/573644/792865/799867
dre00910	Nitrogen metabolism	1	0.899407	1	0.927494	373092
dre04216	Ferroptosis	3	0.899878	1	0.927494	322425/436827/791518
dre01210	2-Oxocarboxylic acid metabolism	1	0.910879	1	0.927494	568448
dre00900	Terpenoid backbone biosynthesis	1	0.930053	1	0.927494	100003383
dre04114	Oocyte meiosis	11	0.93027	1	0.927494	323883/334373/393956/406419/406660/406816/449548/560807/562064/564337/791855
dre04744	Phototransduction	2	0.934492	1	0.927494	322104/406660
dre04140	Autophagy - animal	13	0.93706	1	0.927494	100002263/100009663/100150844/114401/30380/321453/336632/336746/378972/393405/558314/567524/573492
dre04150	mTOR signaling pathway	15	0.940536	1	0.927494	100002263/30380/378972/393287/393732/406471/497384/550549/556286/559050/562995/567524/573492/79380/799566
dre03030	DNA replication	2	0.94068	1	0.927494	393241/571834
dre03010	Ribosome	10	0.949778	1	0.927494	100000341/100093703/192301/336710/337148/415229/552972/553580/553771/791211
dre04070	Phosphatidylinositol signaling system	8	0.953073	1	0.927494	100002263/406660/449831/497384/553380/560360/568288/569040
dre00601	Glycosphingolipid biosynthesis - lacto and neolacto series	1	0.956925	1	0.927494	336526
dre04261	Adrenergic signaling in cardiomyocytes	16	0.957297	1	0.927494	327650/336421/378972/406598/406660/406853/449548/497384/553700/555432/560807/562064/566032/573207/64612/791855
dre00514	Other types of O-glycan biosynthesis	1	0.970062	1	0.927494	556077
dre00534	Glycosaminoglycan biosynthesis - heparan sulfate / heparin	1	0.973482	1	0.927494	793524
dre04622	RIG-I-like receptor signaling pathway	3	0.97794	1	0.927494	30116/393287/562867
dre04144	Endocytosis	25	0.979709	1	0.927494	100148154/30639/30739/327026/335810/352940/393880/394099/399477/406766/415240/436839/449831/492487/492497/556104/559329/559634/560210/560581/565109/565859/58092/793623/797187
dre04540	Gap junction	8	0.984251	1	0.927494	30236/30380/327650/336421/337223/497384/556286/560807
dre00062	Fatty acid elongation	1	0.985547	1	0.927494	335732
dre04914	Progesterone-mediated oocyte maturation	6	0.987782	1	0.927494	100002263/327650/336421/378972/393956/560807
dre04010	MAPK signaling pathway	30	0.988048	1	0.927494	100003481/100150664/101101687/30380/30467/30704/30739/321107/324125/352940/373121/378972/393287/394099/406471/406714/415242/436608/497384/553179/556286/558154/560210/560875/564337/569243/65239/678610/795414/796537
dre04620	Toll-like receptor signaling pathway	5	0.989434	1	0.927494	100002263/30768/378972/393287/65239
dre04270	Vascular smooth muscle contraction	9	0.990509	1	0.927494	100150844/100331745/317747/402802/406493/406660/497384/560807/570218
dre03440	Homologous recombination	1	0.992127	1	0.927494	571834
dre01212	Fatty acid metabolism	2	0.992503	1	0.927494	100000859/445288
dre04020	Calcium signaling pathway	18	0.996266	1	0.927494	100038774/245950/393186/393937/406660/447887/497384/554046/556199/560875/562064/564337/565379/568265/568288/569040/791855/798565
dre04060	Cytokine-cytokine receptor interaction	9	0.999295	1	0.927494	100150664/30739/406471/553179/553366/558154/559725/796537/799475
dre00190	Oxidative phosphorylation	3	0.999993	1	0.927494	394151/402883/554125
dre04260	Cardiac muscle contraction	1	0.999993	1	0.927494	64612
dre04080	Neuroactive ligand-receptor interaction	6	1	1	0.927494	30607/445315/561773/565237/571773/798001

## Sheet: CC HARA F0F1
	Description	Count	pvalue	p.adjust	qvalue	geneID
GO:0005730	nucleolus	92	1.39038e-40	5.61713e-38	4.97609e-38	llph/nhp2/dhx37/ddx19/npm1a/pwp2h/ddx54/diexf/ddx3b/pes/nifk/wdr3/snu13b/ddx18/nop2/rrp36/ftsj3/mybbp1a/noc3l/wdr36/ilf3b/gnl3/ddx5/mphosph10/ddx39aa/polr1b/polr1a/nol6/heatr1/zgc:173742/ebna1bp2/pak1ip1/rrs1/wdr75/ddx27/ddx49/eif6/dcaf13/utp6/nol10/imp3/nol12/nat10/exosc4/gar1/surf6/eif4a3/nop56/kri1/bxdc2/twistnb/ddx39ab/fbl/rcc2/rpf1/gtpbp10/rpp38/nop16/ddx51/ddx56/polr1d/utp3/polr2i/cdkn2aipn…
GO:0030684	preribosome	38	9.14804e-24	1.8479e-21	1.63702e-21	pwp2h/diexf/pes/wdr3/snu13b/rrp36/ftsj3/wdr36/mphosph10/tsr1/rrp15/nol6/heatr1/ebna1bp2/rrs1/eif6/dcaf13/utp6/imp3/nat10/nop56/kri1/rrp9/fbl/znf622/rpf1/ltv1/utp3/cmss1/nop58/bms1/si:dkey-251i10.3/nip7/noc4l/noc2l/emg1/bop1/pdcd11
GO:1990904	ribonucleoprotein complex	109	9.45744e-21	1.2736e-18	1.12826e-18	rps23/nhp2/magoh/mrpl54/mrpl36/ago4/rpl24/snrpd1/ddx19/pwp2h/phf5a/diexf/ddx3b/pes/wdr3/snu13b/rrp36/ftsj3/prpf40a/wdr36/rbmx/rpl7l1/mphosph10/snrpa/atxn2l/tsr1/ddx39aa/rrp15/rbm25b/nol6/heatr1/ebna1bp2/dhx16/rpl7/rps15/rrs1/gpkow/eif6/dcaf13/utp6/smu1a/imp3/prpf31/nat10/gar1/cpeb4a/srp54/surf6/eif4a3/nop56/kri1/rrp9/u2af2b/eif4h/casc3/ddx39ab/fbl/sumo1/rbm22/eif3jb/sf3b3/mrps31/znf622/rpl11/rpf1…
GO:0044452	nucleolar part	24	5.46755e-14	5.19583e-12	4.60287e-12	nhp2/pwp2h/pes/wdr3/snu13b/wdr36/mphosph10/polr1b/polr1a/nol6/heatr1/utp6/imp3/gar1/nop56/twistnb/fbl/rpp38/polr1d/nop58/pop4/dkc1/bop1/polr2k
GO:0032040	small-subunit processome	20	6.43049e-14	5.19583e-12	4.60287e-12	pwp2h/diexf/wdr3/snu13b/wdr36/mphosph10/nol6/heatr1/dcaf13/utp6/imp3/nop56/rrp9/fbl/utp3/nop58/si:dkey-251i10.3/noc4l/emg1/pdcd11
GO:0030686	90S preribosome	17	4.2604e-12	2.86867e-10	2.54129e-10	pwp2h/pes/wdr3/rrp36/wdr36/mphosph10/nol6/heatr1/utp6/imp3/nat10/kri1/cmss1/bms1/noc4l/noc2l/bop1
GO:0005654	nucleoplasm	67	7.01126e-10	4.0465e-08	3.5847e-08	mettl3/magoh/ctr9/maml3/pes/max/ruvbl1/rbbp4/gtf2h2/lsg1/rnf2/cpsf6/gtf2e2/med14/cdk8/smu1a/ncor1/cdc73/prpf31/eif4a3/u2af2b/casc3/leo1/fbl/sumo3a/aebp2/zgc:86811/gtf2f2a/polr3h/ctdp1/polr1d/dscc1/polr3gla/wdr33/polr2i/cdkn2aipnl/rbm8a/nmd3/elp3/psme4b/polr2a/tbl1xr1a/rpap2/elp2/elmsan1b/riox1/ncor2/suz12b/ints1/polr3b/supt16h/sin3aa/med13b/ep300b/crebbpa/crebbpb/shq1/kansl1b/chd3/kpna1/smndc1/no…
GO:0044451	nucleoplasm part	58	8.05876e-09	4.06968e-07	3.60524e-07	mettl3/magoh/ctr9/maml3/max/ruvbl1/rbbp4/gtf2h2/lsg1/rnf2/cpsf6/gtf2e2/med14/cdk8/smu1a/ncor1/cdc73/prpf31/eif4a3/u2af2b/casc3/leo1/fbl/sumo3a/aebp2/zgc:86811/gtf2f2a/polr3h/ctdp1/polr1d/polr3gla/wdr33/polr2i/rbm8a/elp3/psme4b/polr2a/tbl1xr1a/rpap2/elp2/elmsan1b/ncor2/suz12b/ints1/polr3b/supt16h/sin3aa/med13b/ep300b/crebbpa/crebbpb/kansl1b/chd3/smndc1/supt5h/bahcc1b/polr2k/rrp8
GO:0005681	spliceosomal complex	27	2.99821e-07	1.34586e-05	1.19227e-05	magoh/snrpd1/ddx19/phf5a/snu13b/prpf40a/rbmx/ddx39aa/rbm25b/dhx16/gpkow/smu1a/prpf31/eif4a3/u2af2b/ddx39ab/rbm22/sf3b3/zmat5/bud31/sf3a3/txnl4a/rbmx2/cwc22/sf3b2/smndc1/txnl4b
GO:0030687	preribosome, large subunit precursor	11	7.24399e-07	2.92657e-05	2.59258e-05	pes/ftsj3/rrp15/ebna1bp2/rrs1/eif6/znf622/rpf1/nip7/noc2l/bop1
GO:0005732	small nucleolar ribonucleoprotein complex	9	1.01414e-06	3.72465e-05	3.29958e-05	nhp2/snu13b/mphosph10/gar1/nop56/fbl/nop58/pop4/dkc1
GO:0061695	transferase complex, transferring phosphorus-containing groups	31	5.74891e-06	0.000193547	0.000171459	pik3cb/ctr9/ccnt2b/gtf2h2/adgrg1/polr1b/polr1a/gtf2e2/med14/chuk/cdc73/atg13/phkg2/twistnb/leo1/pik3cg/gtf2f2a/polr3h/ctdp1/polr1d/polr3gla/polr2i/polr2a/phkg1b/rpap2/phka2/ints1/polr3b/phkg1a/si:dkey-28b4.7/polr2k
GO:1990234	transferase complex	70	7.05485e-06	0.000219243	0.000194223	pik3cb/ddb2/mettl3/ctr9/ube4b/dcun1d2a/max/ruvbl1/ccnt2b/rbbp4/gtf2h2/cul1a/cul3a/adgrg1/polr1b/rnf2/polr1a/dcun1d1/gtf2e2/cul2/atg3/med14/dcaf13/chuk/cdc73/atg13/prpf31/phkg2/twistnb/leo1/klhl21/pik3cg/fbxw5/aebp2/cul1b/gtf2f2a/polr3h/ctdp1/naa50/polr1d/crbn/polr3gla/polr2i/spopla/polr2a/phkg1b/rpap2/phka2/spoplb/elp2/suz12b/ints1/polr3b/phkg1a/ube2s/ep300b/ankib1a/si:ch211-284e13.9/crebbpa/creb…
GO:0016604	nuclear body	16	3.75425e-05	0.00108337	0.000959732	mettl3/magoh/maml3/lsg1/rnf2/cpsf6/smu1a/eif4a3/u2af2b/casc3/fbl/sumo3a/zgc:86811/rbm8a/psme4b/smndc1
GO:0055029	nuclear DNA-directed RNA polymerase complex	20	4.08676e-05	0.0011007	0.000975087	ctr9/gtf2h2/polr1b/polr1a/gtf2e2/med14/cdc73/twistnb/leo1/gtf2f2a/polr3h/ctdp1/polr1d/polr3gla/polr2i/polr2a/rpap2/ints1/polr3b/polr2k
GO:0000428	DNA-directed RNA polymerase complex	20	4.88702e-05	0.00116139	0.00102885	ctr9/gtf2h2/polr1b/polr1a/gtf2e2/med14/cdc73/twistnb/leo1/gtf2f2a/polr3h/ctdp1/polr1d/polr3gla/polr2i/polr2a/rpap2/ints1/polr3b/polr2k
GO:0030880	RNA polymerase complex	20	4.88702e-05	0.00116139	0.00102885	ctr9/gtf2h2/polr1b/polr1a/gtf2e2/med14/cdc73/twistnb/leo1/gtf2f2a/polr3h/ctdp1/polr1d/polr3gla/polr2i/polr2a/rpap2/ints1/polr3b/polr2k
GO:0016607	nuclear speck	11	0.000669143	0.0144612	0.0128108	mettl3/magoh/maml3/cpsf6/smu1a/eif4a3/u2af2b/casc3/rbm8a/psme4b/smndc1
GO:0070603	SWI/SNF superfamily-type complex	10	0.000680105	0.0144612	0.0128108	actl6a/smarca5/ruvbl1/smarca2/smarcc1a/uchl5/smarca1/suz12b/chd3/ino80b
GO:0034708	methyltransferase complex	9	0.00225744	0.0411318	0.0364377	mettl3/max/ruvbl1/rbbp4/rnf2/prpf31/aebp2/suz12b/wdr4
GO:0016591	DNA-directed RNA polymerase II, holoenzyme	13	0.00231123	0.0411318	0.0364377	ctr9/gtf2h2/gtf2e2/med14/cdc73/leo1/gtf2f2a/ctdp1/polr2i/polr2a/rpap2/ints1/polr2k
GO:0120114	Sm-like protein family complex	13	0.00231123	0.0411318	0.0364377	snrpd1/phf5a/snu13b/prpf40a/snrpa/prpf31/rbpms2a/sart1/txnl4a/rbmx2/ddx20/sf3b2/txnl4b
GO:0031519	PcG protein complex	6	0.00253052	0.0411318	0.0364377	csnk2b/rbbp4/rnf2/aebp2/suz12b/pcgf5b
GO:0005736	DNA-directed RNA polymerase I complex	5	0.00253876	0.0411318	0.0364377	polr1b/polr1a/twistnb/polr1d/polr2k
GO:0071013	catalytic step 2 spliceosome	10	0.00254528	0.0411318	0.0364377	magoh/snrpd1/ddx19/phf5a/rbmx/eif4a3/rbm22/rbmx2/cwc22/sf3b2
GO:0097525	spliceosomal snRNP complex	12	0.00273034	0.0424253	0.0375836	snrpd1/phf5a/snu13b/prpf40a/snrpa/prpf31/rbpms2a/sart1/txnl4a/rbmx2/sf3b2/txnl4b
GO:0000790	nuclear chromatin	18	0.00354699	0.0498671	0.0441762	actl6a/smarca5/ruvbl1/rbmx/cpsf6/smarca2/ncor1/smarcc1a/uchl5/junba/dffa/polr3gla/smarca1/suz12b/sin3aa/chd3/ino80b/ube2a
GO:0030532	small nuclear ribonucleoprotein complex	12	0.00373299	0.0498671	0.0441762	snrpd1/phf5a/snu13b/prpf40a/snrpa/prpf31/rbpms2a/sart1/txnl4a/rbmx2/sf3b2/txnl4b
GO:0035097	histone methyltransferase complex	7	0.00382017	0.0498671	0.0441762	max/ruvbl1/rbbp4/rnf2/prpf31/aebp2/suz12b
GO:0034364	high-density lipoprotein particle	5	0.00382644	0.0498671	0.0441762	apoeb/apoa4b.1/apoea/apoa4b.2/si:dkey-7f3.14
GO:0042627	chylomicron	5	0.00382644	0.0498671	0.0441762	apoeb/apoa4b.1/apoea/apoa4b.2/si:dkey-7f3.14
GO:1904949	ATPase complex	10	0.00441507	0.0557402	0.049379	actl6a/smarca5/ruvbl1/smarca2/smarcc1a/uchl5/smarca1/suz12b/chd3/ino80b
GO:0000502	proteasome complex	12	0.00577153	0.0685793	0.0607529	psmb5/psme3/psmc6/psmd11b/psmd6/psmd8/nek6/psmd11a/psmd4b/psme4b/elp2/psma6l
GO:1905369	endopeptidase complex	12	0.00577153	0.0685793	0.0607529	psmb5/psme3/psmc6/psmd11b/psmd6/psmd8/nek6/psmd11a/psmd4b/psme4b/elp2/psma6l
GO:0022624	proteasome accessory complex	7	0.00620796	0.0698785	0.0619038	psme3/psmc6/psmd11b/psmd6/psmd8/psmd11a/psmd4b
GO:0000785	chromatin	30	0.00622679	0.0698785	0.0619038	actl6a/smarca5/pparda/ruvbl1/h1f0/rbmx/h1fx/cpsf6/smarca2/ncor1/smarcc1a/uchl5/hmga1a/junba/dffa/dscc1/polr3gla/nr1d1/si:ch73-1a9.3/sos1/hp1bp3/smarca1/suz12b/sin3aa/pds5b/chd3/ino80b/bahcc1b/rrp8/ube2a
GO:1902554	serine/threonine protein kinase complex	9	0.00726543	0.0764304	0.0677081	ccnt2b/gtf2h2/adgrg1/chuk/atg13/phkg2/phkg1b/phka2/phkg1a
GO:0032994	protein-lipid complex	5	0.00768544	0.0764304	0.0677081	apoeb/apoa4b.1/apoea/apoa4b.2/si:dkey-7f3.14
GO:0034358	plasma lipoprotein particle	5	0.00768544	0.0764304	0.0677081	apoeb/apoa4b.1/apoea/apoa4b.2/si:dkey-7f3.14
GO:1990777	lipoprotein particle	5	0.00768544	0.0764304	0.0677081	apoeb/apoa4b.1/apoea/apoa4b.2/si:dkey-7f3.14
GO:0005759	mitochondrial matrix	19	0.00775655	0.0764304	0.0677081	gls2a/mrpl54/mrpl36/clpxb/hagh/hspa9/aldh4a1/mrps31/mrps26/mrpl40/mrps17/mrpl4/mrps22/grpel1/lonp1/zgc:171480/tfb2m/supv3l1/mrps2
GO:0030137	COPI-coated vesicle	4	0.00836724	0.0788991	0.069895	dia1b/copb2/copg2/copb1
GO:0005635	nuclear envelope	21	0.0085804	0.0788991	0.069895	cse1l/nup50/bnip3la/sephs1/dpy19l1l/tmem170a/tor1l3/nupl2/nup133/ipo9/ipo11/cnep1r1/ipo4/noc4l/xpot/tprb/bmb/tor1/kpna1/mgst2/cptp
GO:1902911	protein kinase complex	9	0.00859297	0.0788991	0.069895	ccnt2b/gtf2h2/adgrg1/chuk/atg13/phkg2/phkg1b/phka2/phkg1a
GO:0000178	exosome (RNase complex)	5	0.0103747	0.0893065	0.0791147	dis3/exosc4/exosc10/exosc2/supv3l1
GO:1905354	exoribonuclease complex	5	0.0103747	0.0893065	0.0791147	dis3/exosc4/exosc10/exosc2/supv3l1
GO:0017053	transcriptional repressor complex	6	0.0103896	0.0893065	0.0791147	coro2a/hes6/hdac3/chd3/bahcc1b/rrp8
GO:0008023	transcription elongation factor complex	7	0.0116579	0.098121	0.0869233	ctr9/cdc73/leo1/elp3/elp2/supt16h/supt5h
GO:0001726	ruffle	4	0.012236	0.100884	0.0893711	cyfip1/panx1a/tln1/cobl
GO:0005838	proteasome regulatory particle	6	0.0130235	0.10523	0.0932208	psmc6/psmd11b/psmd6/psmd8/psmd11a/psmd4b
GO:0097526	spliceosomal tri-snRNP complex	6	0.0160913	0.127468	0.112921	snrpd1/snu13b/prpf31/sart1/txnl4a/txnl4b
GO:0046540	U4/U6 x U5 tri-snRNP complex	5	0.017539	0.136265	0.120714	snu13b/prpf31/sart1/txnl4a/txnl4b
GO:0000313	organellar ribosome	10	0.0214528	0.160499	0.142182	mrpl54/mrpl36/mrps31/mrps26/mrpl40/mrps17/mrpl4/mrps22/zgc:171480/mrps2
GO:0005761	mitochondrial ribosome	10	0.0214528	0.160499	0.142182	mrpl54/mrpl36/mrps31/mrps26/mrpl40/mrps17/mrpl4/mrps22/zgc:171480/mrps2
GO:0000118	histone deacetylase complex	6	0.0236482	0.170605	0.151135	ncor1/tbl1xr1a/elmsan1b/ncor2/sin3aa/chd3
GO:0071011	precatalytic spliceosome	6	0.0236482	0.170605	0.151135	snrpd1/phf5a/snu13b/prpf31/rbmx2/sf3b2
GO:1905368	peptidase complex	12	0.0262584	0.184332	0.163296	psmb5/psme3/psmc6/psmd11b/psmd6/psmd8/nek6/psmd11a/psmd4b/psme4b/elp2/psma6l
GO:0000314	organellar small ribosomal subunit	5	0.027376	0.184332	0.163296	mrps31/mrps26/mrps17/mrps22/mrps2
GO:0005666	DNA-directed RNA polymerase III complex	5	0.027376	0.184332	0.163296	polr3h/polr1d/polr3gla/polr3b/polr2k
GO:0005763	mitochondrial small ribosomal subunit	5	0.027376	0.184332	0.163296	mrps31/mrps26/mrps17/mrps22/mrps2
GO:0005689	U12-type spliceosomal complex	4	0.0380586	0.25206	0.223295	snrpd1/phf5a/zmat5/sf3b2
GO:0044429	mitochondrial part	55	0.0436355	0.284335	0.251886	gls2a/mrpl54/si:dkey-251i10.1/mrpl36/si:dkey-13i19.8/clpxb/bcl2l1/bnip3la/rhot1a/agk/hagh/hspa9/zgc:56235/slc25a32a/rtn4ip1/slc25a39/timm50/aldh4a1/atp5mc3a/bcs1l/qtrt2/mrps31/thop1/mrps26/mpv17l2/slc25a36a/sfxn1/timm8a/mrpl40/miga1/pmpca/timm44/zgc:112052/zgc:165532/timmdc1/timm10b/ankzf1/mrps17/timm29/mrpl4/ndufa2/mrps22/grpel1/mavs/lonp1/zgc:171480/mief1/abcb7/mfn2/tfb2m/supv3l1/hccsb/mrps2/fu…
GO:0005840	ribosome	24	0.044472	0.285071	0.252538	rps23/mrpl54/mrpl36/rpl24/rpl7l1/rpl7/rps15/surf6/mrps31/znf622/rpl11/mrps33/mrps26/mrpl40/mrps18b/faub/mrpl34/mrps17/nle1/mrpl4/mrps22/zgc:171480/hspa14/mrps2
GO:0048471	perinuclear region of cytoplasm	10	0.0451598	0.285071	0.252538	prkcdb/cdh2/ndfip1/optn/cyfip1/hif1an/ndor1/cops5/cpeb4a/casc3
GO:0005684	U2-type spliceosomal complex	6	0.051912	0.318578	0.282221	snrpd1/prpf40a/u2af2b/rbm22/cwc22/sf3b2
GO:0000177	cytoplasmic exosome (RNase complex)	3	0.0520449	0.318578	0.282221	exosc4/exosc2/supv3l1
GO:0000151	ubiquitin ligase complex	23	0.055892	0.332656	0.294693	ddb2/ube4b/dcun1d2a/cul1a/cul3a/rnf2/dcun1d1/cul2/atg3/dcaf13/klhl21/fbxw5/cul1b/crbn/spopla/spoplb/ube2s/ankib1a/si:ch211-284e13.9/cul3b/bach1a/klhl24a/ube2a
GO:0019867	outer membrane	12	0.0572732	0.332656	0.294693	bcl2l1/bnip3la/rhot1a/zgc:56235/rtn4ip1/qtrt2/miga1/ankzf1/mief1/mfn2/cptp/fundc2
GO:0031968	organelle outer membrane	12	0.0572732	0.332656	0.294693	bcl2l1/bnip3la/rhot1a/zgc:56235/rtn4ip1/qtrt2/miga1/ankzf1/mief1/mfn2/cptp/fundc2
GO:0080008	Cul4-RING E3 ubiquitin ligase complex	4	0.0576384	0.332656	0.294693	ddb2/dcaf13/fbxw5/crbn
GO:0000176	nuclear exosome (RNase complex)	3	0.0669733	0.375794	0.332908	exosc4/exosc10/exosc2
GO:0097346	INO80-type complex	3	0.0669733	0.375794	0.332908	ruvbl1/uchl5/ino80b
GO:0005686	U2 snRNP	4	0.0690954	0.377224	0.334174	snrpd1/phf5a/rbmx2/sf3b2
GO:0034399	nuclear periphery	4	0.0690954	0.377224	0.334174	ebna1bp2/akap8l/ipo4/xpot
GO:0005741	mitochondrial outer membrane	11	0.0712086	0.383577	0.339802	bcl2l1/bnip3la/rhot1a/zgc:56235/rtn4ip1/qtrt2/miga1/ankzf1/mief1/mfn2/fundc2
GO:0044454	nuclear chromosome part	22	0.0769097	0.408836	0.362179	actl6a/smarca5/ruvbl1/rbmx/cpsf6/smarca2/xrcc6/zgc:173742/ncor1/smarcc1a/uchl5/junba/dffa/polr3gla/top1l/smarca1/suz12b/sin3aa/chd3/si:dkey-28b4.7/ino80b/ube2a
GO:0000145	exocyst	4	0.0816263	0.428273	0.379397	exoc4/exoc3l4/exoc3l2b/tnfaip2a
GO:0072546	ER membrane protein complex	3	0.0836028	0.43302	0.383603	emc8/emc7/emc10
GO:0031227	intrinsic component of endoplasmic reticulum membrane	12	0.0938393	0.464834	0.411787	march6/zgc:162183/hm13/elovl4b/slc37a2/emc8/g6pca.1/emc7/emc10/esyt1a/esyt1b/slc35b3
GO:0005685	U1 snRNP	4	0.0951888	0.464834	0.411787	snrpd1/prpf40a/snrpa/rbpms2a
GO:0014069	postsynaptic density	4	0.0951888	0.464834	0.411787	dlg1/cpeb4a/dlg1l/srgap2
GO:0099572	postsynaptic specialization	4	0.0951888	0.464834	0.411787	dlg1/cpeb4a/dlg1l/srgap2
GO:0016459	myosin complex	10	0.0954982	0.464834	0.411787	cgnb/myo3a/mybpc1/myo1b/myh10/myo9b/myh9b/myo18aa/myo5b/myo10
GO:0000228	nuclear chromosome	22	0.100585	0.478179	0.423608	actl6a/smarca5/ruvbl1/rbmx/cpsf6/smarca2/xrcc6/zgc:173742/ncor1/smarcc1a/uchl5/junba/dffa/polr3gla/top1l/smarca1/suz12b/sin3aa/chd3/si:dkey-28b4.7/ino80b/ube2a
GO:0005665	DNA-directed RNA polymerase II, core complex	3	0.101791	0.478179	0.423608	polr2i/polr2a/polr2k
GO:0031235	intrinsic component of the cytoplasmic side of the plasma membrane	3	0.101791	0.478179	0.423608	dab2ipb/rasa1b/rasal3
GO:0005925	focal adhesion	4	0.109732	0.497455	0.440685	ptk2bb/ilk/tln1/peak1
GO:0032279	asymmetric synapse	4	0.109732	0.497455	0.440685	dlg1/cpeb4a/dlg1l/srgap2
GO:0098984	neuron to neuron synapse	4	0.109732	0.497455	0.440685	dlg1/cpeb4a/dlg1l/srgap2
GO:0035770	ribonucleoprotein granule	9	0.110819	0.497455	0.440685	ago4/ddx3b/atxn2l/casc3/sumo1/cnot1/trim71/dcp1b/mcrip1
GO:0044391	ribosomal subunit	17	0.114282	0.507361	0.44946	rps23/mrpl54/mrpl36/rpl24/rpl7l1/rpl7/rps15/surf6/mrps31/znf622/rpl11/mrps26/mrps17/mrpl4/mrps22/zgc:171480/mrps2
GO:0031461	cullin-RING ubiquitin ligase complex	15	0.116121	0.509924	0.451731	ddb2/cul1a/cul3a/cul2/dcaf13/klhl21/fbxw5/cul1b/crbn/spopla/spoplb/ube2s/cul3b/bach1a/klhl24a
GO:0005924	cell-substrate adherens junction	4	0.125195	0.538074	0.476668	ptk2bb/ilk/tln1/peak1
GO:0030055	cell-substrate junction	4	0.125195	0.538074	0.476668	ptk2bb/ilk/tln1/peak1
GO:0019013	viral nucleocapsid	5	0.135261	0.565056	0.500571	snrpd1/snrpa/hnrnpub/hnrpkl/hnrnpl2
GO:0019028	viral capsid	5	0.135261	0.565056	0.500571	snrpd1/snrpa/hnrnpub/hnrpkl/hnrnpl2
GO:0044427	chromosomal part	39	0.135669	0.565056	0.500571	actl6a/smarca5/pparda/ruvbl1/h1f0/rbmx/h1fx/cpsf6/smarca2/xrcc6/zgc:173742/ncor1/ndel1a/smarcc1a/uchl5/hmga1a/nup133/junba/dffa/dscc1/polr3gla/ska2/ckap5/nr1d1/top1l/si:ch73-1a9.3/sos1/hp1bp3/smarca1/suz12b/sin3aa/pds5b/cfdp1/chd3/si:dkey-28b4.7/ino80b/bahcc1b/rrp8/ube2a
GO:0005643	nuclear pore	6	0.139201	0.573849	0.50836	nup50/nupl2/nup133/xpot/tprb/kpna1
GO:0030427	site of polarized growth	3	0.142212	0.574535	0.508968	cpeb4a/exoc4/fryb
GO:0031306	intrinsic component of mitochondrial outer membrane	3	0.142212	0.574535	0.508968	rhot1a/mfn2/fundc2
GO:0042175	nuclear outer membrane-endoplasmic reticulum membrane network	39	0.147096	0.588384	0.521236	march6/zgc:162183/dlg1/sec22ba/cyp1a/hm13/porb/elovl4b/ncln/sdf2/ssr1/kdelr2a/rdh10b/tmem170a/slc37a2/emc8/gpat3/g6pca.1/slc51a/rtn4a/cyp1d1/asah2/erlin1/cnep1r1/creb3l3a/alg3/emc7/emc10/esyt1a/pora/cyp7b1/rsad2/esyt1b/slc35b3/rtn4b/cptp/sec61b/rhbdf1a/ssr2
GO:0019005	SCF ubiquitin ligase complex	5	0.149329	0.591462	0.523963	cul1a/fbxw5/cul1b/spopla/spoplb
GO:0044432	endoplasmic reticulum part	40	0.153326	0.601397	0.532764	march6/zgc:162183/dlg1/sec22ba/cyp1a/hm13/porb/elovl4b/ncln/sdf2/ssr1/kdelr2a/rdh10b/tmem170a/tor1l3/slc37a2/emc8/gpat3/g6pca.1/slc51a/rtn4a/cyp1d1/asah2/erlin1/creb3l3a/alg3/emc7/tor1/emc10/esyt1a/pora/cyp7b1/rsad2/esyt1b/slc35b3/rtn4b/foxred2/sec61b/rhbdf1a/ssr2
GO:0005694	chromosome	43	0.159709	0.609696	0.540116	llph/actl6a/smarca5/pparda/ruvbl1/h1f0/rbmx/h1fx/rnf2/cpsf6/smarca2/xrcc6/zgc:173742/ncor1/prdm9/ndel1a/uvssa/smarcc1a/uchl5/hmga1a/nup133/junba/dffa/dscc1/polr3gla/ska2/ckap5/nr1d1/top1l/si:ch73-1a9.3/sos1/hp1bp3/smarca1/suz12b/sin3aa/pds5b/cfdp1/chd3/si:dkey-28b4.7/ino80b/bahcc1b/rrp8/ube2a
GO:0016324	apical plasma membrane	7	0.162578	0.609696	0.540116	mfsd4b/dlg1/cse1l/acy3.2/asah2/abcg2c/slc34a2a
GO:0031248	protein acetyltransferase complex	7	0.162578	0.609696	0.540116	ruvbl1/naa50/elp2/ep300b/crebbpa/crebbpb/kansl1b
GO:1902493	acetyltransferase complex	7	0.162578	0.609696	0.540116	ruvbl1/naa50/elp2/ep300b/crebbpa/crebbpb/kansl1b
GO:0005682	U5 snRNP	3	0.164117	0.609696	0.540116	snrpd1/txnl4a/txnl4b
GO:0000123	histone acetyltransferase complex	6	0.164497	0.609696	0.540116	ruvbl1/elp2/ep300b/crebbpa/crebbpb/kansl1b
GO:0015934	large ribosomal subunit	10	0.169439	0.613662	0.54363	mrpl54/mrpl36/rpl24/rpl7l1/rpl7/surf6/znf622/rpl11/mrpl4/zgc:171480
GO:0031965	nuclear membrane	8	0.170124	0.613662	0.54363	sephs1/dpy19l1l/nupl2/cnep1r1/ipo4/noc4l/bmb/cptp
GO:0036464	cytoplasmic ribonucleoprotein granule	8	0.170124	0.613662	0.54363	ago4/ddx3b/atxn2l/casc3/cnot1/trim71/dcp1b/mcrip1
GO:0045177	apical part of cell	7	0.174484	0.62382	0.552629	mfsd4b/dlg1/cse1l/acy3.2/asah2/abcg2c/slc34a2a
GO:0019012	virion	5	0.179181	0.629471	0.557635	snrpd1/snrpa/hnrnpub/hnrpkl/hnrnpl2
GO:0044423	virion part	5	0.179181	0.629471	0.557635	snrpd1/snrpa/hnrnpub/hnrpkl/hnrnpl2
GO:0098798	mitochondrial protein complex	19	0.181684	0.63276	0.560548	mrpl54/mrpl36/agk/timm50/atp5mc3a/mrps31/mrps26/mrpl40/timm10b/ankzf1/mrps17/timm29/mrpl4/ndufa2/mrps22/grpel1/zgc:171480/supv3l1/mrps2
GO:0030176	integral component of endoplasmic reticulum membrane	10	0.198849	0.686625	0.608266	march6/zgc:162183/hm13/elovl4b/slc37a2/emc8/g6pca.1/emc7/emc10/slc35b3
GO:0005789	endoplasmic reticulum membrane	37	0.208431	0.70869	0.627813	march6/zgc:162183/dlg1/sec22ba/cyp1a/hm13/porb/elovl4b/ncln/sdf2/ssr1/kdelr2a/rdh10b/tmem170a/slc37a2/emc8/gpat3/g6pca.1/slc51a/rtn4a/cyp1d1/asah2/erlin1/creb3l3a/alg3/emc7/emc10/esyt1a/pora/cyp7b1/rsad2/esyt1b/slc35b3/rtn4b/sec61b/rhbdf1a/ssr2
GO:0005788	endoplasmic reticulum lumen	3	0.210502	0.70869	0.627813	tor1l3/tor1/foxred2
GO:0005852	eukaryotic translation initiation factor 3 complex	3	0.210502	0.70869	0.627813	abce1/eif3jb/eif3hb
GO:0098827	endoplasmic reticulum subcompartment	37	0.213336	0.712294	0.631006	march6/zgc:162183/dlg1/sec22ba/cyp1a/hm13/porb/elovl4b/ncln/sdf2/ssr1/kdelr2a/rdh10b/tmem170a/slc37a2/emc8/gpat3/g6pca.1/slc51a/rtn4a/cyp1d1/asah2/erlin1/creb3l3a/alg3/emc7/emc10/esyt1a/pora/cyp7b1/rsad2/esyt1b/slc35b3/rtn4b/sec61b/rhbdf1a/ssr2
GO:0016363	nuclear matrix	2	0.220474	0.718319	0.636343	akap8l/xpot
GO:1902555	endoribonuclease complex	2	0.220474	0.718319	0.636343	rpp38/pop4
GO:1905348	endonuclease complex	2	0.220474	0.718319	0.636343	rpp38/pop4
GO:0030660	Golgi-associated vesicle membrane	5	0.227597	0.735594	0.651646	dia1b/copb2/hm13/copg2/copb1
GO:0072562	blood microparticle	6	0.235029	0.753585	0.667584	apoeb/apoa4b.1/apoea/ahsg2/apoa4b.2/si:dkey-7f3.14
GO:0031966	mitochondrial membrane	36	0.242183	0.76187	0.674924	si:dkey-251i10.1/si:dkey-13i19.8/bcl2l1/bnip3la/rhot1a/agk/zgc:56235/slc25a32a/rtn4ip1/slc25a39/timm50/atp5mc3a/bcs1l/qtrt2/mpv17l2/slc25a36a/sfxn1/timm8a/miga1/pmpca/timm44/zgc:112052/zgc:165532/timmdc1/timm10b/ankzf1/timm29/ndufa2/grpel1/mavs/mief1/abcb7/mfn2/hccsb/fundc2/yme1l1a
GO:0030054	cell junction	31	0.24907	0.76187	0.674924	jcada/cgnb/magi1a/pkp3b/dlg1/ache/ptk2bb/mpp7a/cx43/cdh2/rap1b/dspa/wu:fi04e12/cyfip1/tjp1a/ilk/cops5/panx1a/cpeb4a/cx30.3/epb41l3b/chrne/cx28.9/tln1/srgap2/si:ch73-22o12.1/peak1/tjp2a/plekha7a/cldn15a/grik1a
GO:0022625	cytosolic large ribosomal subunit	6	0.250146	0.76187	0.674924	rpl24/rpl7l1/rpl7/surf6/znf622/rpl11
GO:0044798	nuclear transcription factor complex	7	0.252767	0.76187	0.674924	nr5a2/gtf2h2/brf1a/gtf2e2/med14/gtf2f2a/gtf3c5
GO:0000315	organellar large ribosomal subunit	4	0.25329	0.76187	0.674924	mrpl54/mrpl36/mrpl4/zgc:171480
GO:0005762	mitochondrial large ribosomal subunit	4	0.25329	0.76187	0.674924	mrpl54/mrpl36/mrpl4/zgc:171480
GO:0000243	commitment complex	2	0.254585	0.76187	0.674924	snrpd1/u2af2b
GO:0030426	growth cone	2	0.254585	0.76187	0.674924	cpeb4a/exoc4
GO:0070822	Sin3-type complex	2	0.254585	0.76187	0.674924	ncor1/sin3aa
GO:0043596	nuclear replication fork	3	0.25928	0.770214	0.682315	zgc:173742/top1l/si:dkey-28b4.7
GO:0031252	cell leading edge	5	0.261764	0.771916	0.683823	cyfip1/panx1a/tln1/cobl/srgap2
GO:0015935	small ribosomal subunit	7	0.266748	0.780914	0.691795	rps23/rps15/mrps31/mrps26/mrps17/mrps22/mrps2
GO:0030120	vesicle coat	4	0.273516	0.794969	0.704245	dia1b/copb2/copg2/copb1
GO:0031201	SNARE complex	6	0.296944	0.856895	0.759105	sec22ba/vamp5/napab/snap23.1/stx6/snap47
GO:0071010	prespliceosome	3	0.309311	0.870879	0.771492	snrpd1/prpf40a/u2af2b
GO:0030117	membrane coat	7	0.309816	0.870879	0.771492	dia1b/copb2/ap3m1/copg2/copb1/ap3d1/gga1
GO:0048475	coated membrane	7	0.309816	0.870879	0.771492	dia1b/copb2/ap3m1/copg2/copb1/ap3d1/gga1
GO:0005740	mitochondrial envelope	37	0.310412	0.870879	0.771492	si:dkey-251i10.1/si:dkey-13i19.8/bcl2l1/bnip3la/rhot1a/agk/zgc:56235/slc25a32a/rtn4ip1/slc25a39/timm50/atp5mc3a/bcs1l/qtrt2/thop1/mpv17l2/slc25a36a/sfxn1/timm8a/miga1/pmpca/timm44/zgc:112052/zgc:165532/timmdc1/timm10b/ankzf1/timm29/ndufa2/grpel1/mavs/mief1/abcb7/mfn2/hccsb/fundc2/yme1l1a
GO:0070161	anchoring junction	8	0.319631	0.873896	0.774165	pkp3b/ptk2bb/mpp7a/ilk/tln1/si:ch73-22o12.1/peak1/plekha7a
GO:0005911	cell-cell junction	17	0.320798	0.873896	0.774165	jcada/cgnb/magi1a/pkp3b/mpp7a/cx43/cdh2/rap1b/tjp1a/panx1a/cx30.3/epb41l3b/cx28.9/si:ch73-22o12.1/tjp2a/plekha7a/cldn15a
GO:0005876	spindle microtubule	2	0.32278	0.873896	0.774165	klhl21/ska2
GO:0008540	proteasome regulatory particle, base subcomplex	2	0.32278	0.873896	0.774165	psmc6/psmd4b
GO:0031307	integral component of mitochondrial outer membrane	2	0.32278	0.873896	0.774165	rhot1a/fundc2
GO:0043296	apical junction complex	7	0.324466	0.873896	0.774165	cgnb/magi1a/mpp7a/tjp1a/tjp2a/plekha7a/cldn15a
GO:0098573	intrinsic component of mitochondrial membrane	5	0.332946	0.88001	0.779582	rhot1a/agk/zgc:165532/mfn2/fundc2
GO:0000922	spindle pole	4	0.33545	0.88001	0.779582	tbccd1/klhl21/ckap5/katna1
GO:0008305	integrin complex	4	0.33545	0.88001	0.779582	itgb1a/itgb2/itga1/itgb7
GO:0098636	protein complex involved in cell adhesion	4	0.33545	0.88001	0.779582	itgb1a/itgb2/itga1/itgb7
GO:0031985	Golgi cisterna	5	0.351071	0.908273	0.804619	zgc:165582/golga5/yipf6/golph3/fut11
GO:0099023	tethering complex	5	0.351071	0.908273	0.804619	trappc4/exoc4/exoc3l4/exoc3l2b/tnfaip2a
GO:0022626	cytosolic ribosome	9	0.352967	0.908273	0.804619	rps23/rpl24/rpl7l1/rpl7/rps15/surf6/znf622/rpl11/mrpl4
GO:0005849	mRNA cleavage factor complex	2	0.356347	0.911165	0.807181	cpsf6/wdr33
GO:0030135	coated vesicle	6	0.377829	0.936151	0.829316	dia1b/copb2/copg2/copb1/si:ch211-200p22.4/hip1
GO:0005667	transcription factor complex	16	0.383017	0.936151	0.829316	cry1aa/smad2/nr5a2/gtf2h2/brf1a/gtf2e2/med14/nfe2l2a/maff/tfdp1a/junba/gtf2f2a/elmsan1b/gtf3c5/smad3a/cry2
GO:0000777	condensed chromosome kinetochore	3	0.384581	0.936151	0.829316	nup133/ska2/cfdp1
GO:0044445	cytosolic part	18	0.385075	0.936151	0.829316	rps23/npr2/rpl24/psmc6/rpl7l1/adgrg1/rpl7/rps15/chuk/surf6/znf622/rpl11/mrpl4/adcy6b/tsc2/caspa/snap47/get4
GO:0005794	Golgi apparatus	46	0.386125	0.936151	0.829316	atg9a/zgc:162183/zgc:165582/dia1b/copb2/sec22ba/copg2/nras/ndfip1/yipf3/optn/b3gnt5a/copb1/fgfr2/gorasp2/slc30a1a/yipf4/itm2bb/rab41/golga5/pitpnbl/ift20/yipf6/cav2/mgat4b/pxylp1/rab10/rab30/yipf2/golph3/glt8d1/asah2/sorl1/rab12/galnt1/fut11/cnsta/galnt2/slc35b3/mgat5/limk1a/cptp/glg1a/b3gnt2l/rhbdf1a/sort1b
GO:0000776	kinetochore	5	0.387416	0.936151	0.829316	ndel1a/nup133/ska2/ckap5/cfdp1
GO:0090575	RNA polymerase II transcription factor complex	5	0.387416	0.936151	0.829316	nr5a2/gtf2h2/gtf2e2/med14/gtf2f2a
GO:0000152	nuclear ubiquitin ligase complex	2	0.389291	0.936151	0.829316	rnf2/ube2s
GO:0005844	polysome	2	0.389291	0.936151	0.829316	eif4h/rwdd1
GO:0034707	chloride channel complex	2	0.389291	0.936151	0.829316	clic4/clic5b
GO:0030662	coated vesicle membrane	4	0.397872	0.94553	0.837624	dia1b/copb2/copg2/copb1
GO:0044448	cell cortex part	4	0.397872	0.94553	0.837624	exoc4/exoc3l4/exoc3l2b/tnfaip2a
GO:0005798	Golgi-associated vesicle	5	0.405557	0.958158	0.848811	dia1b/copb2/hm13/copg2/copb1
GO:0015629	actin cytoskeleton	21	0.411871	0.967418	0.857015	cgnb/coro2a/pls1/ivns1abpb/ncf1/ilk/baiap2l2a/myo3a/mybpc1/myo1b/myh10/arpc5lb/fscn1a/myo9b/myh9b/peak1/myo18aa/myo5b/ttc17/arhgap33/myo10
GO:0071004	U2-type prespliceosome	2	0.421458	0.983596	0.871346	prpf40a/u2af2b
GO:0005802	trans-Golgi network	5	0.423628	0.983596	0.871346	pitpnbl/yipf6/rab30/golph3/cnsta
GO:0005912	adherens junction	7	0.428727	0.989748	0.876796	ptk2bb/mpp7a/ilk/tln1/si:ch73-22o12.1/peak1/plekha7a
GO:0030119	AP-type membrane coat adaptor complex	3	0.433752	0.995657	0.882031	ap3m1/ap3d1/gga1
GO:0042611	MHC protein complex	4	0.43898	0.999992	0.885871	zgc:103700/b2m/mhc2dab/mhc2b
GO:0005923	bicellular tight junction	6	0.442947	0.999992	0.885871	cgnb/magi1a/mpp7a/tjp1a/tjp2a/cldn15a
GO:0030139	endocytic vesicle	2	0.452728	0.999992	0.885871	flot2a/srgap2
GO:0005839	proteasome core complex	3	0.457795	0.999992	0.885871	psmb5/psme4b/psma6l
GO:0008287	protein serine/threonine phosphatase complex	3	0.457795	0.999992	0.885871	ppp4r2b/ppp4r2a/cnep1r1
GO:1903293	phosphatase complex	3	0.457795	0.999992	0.885871	ppp4r2b/ppp4r2a/cnep1r1
GO:0005795	Golgi stack	5	0.459423	0.999992	0.885871	zgc:165582/golga5/yipf6/golph3/fut11
GO:0005774	vacuolar membrane	10	0.467944	0.999992	0.885871	hgsnat/hm13/map1lc3b/napab/ccz1/ltv1/slc48a1a/depdc5/mfsd8/rragca
GO:0000775	chromosome, centromeric region	6	0.475045	0.999992	0.885871	ndel1a/nup133/dscc1/ska2/ckap5/cfdp1
GO:0070160	occluding junction	6	0.475045	0.999992	0.885871	cgnb/magi1a/mpp7a/tjp1a/tjp2a/cldn15a
GO:0000932	P-body	4	0.479229	0.999992	0.885871	ago4/cnot1/trim71/dcp1b
GO:0000779	condensed chromosome, centromeric region	3	0.481391	0.999992	0.885871	nup133/ska2/cfdp1
GO:0016323	basolateral plasma membrane	3	0.481391	0.999992	0.885871	dlg1/cse1l/dlg1l
GO:0044455	mitochondrial membrane part	13	0.484607	0.999992	0.885871	si:dkey-13i19.8/rhot1a/agk/timm50/atp5mc3a/zgc:165532/timm10b/ankzf1/timm29/ndufa2/grpel1/mfn2/fundc2
GO:0005921	gap junction	4	0.498929	0.999992	0.885871	cx43/panx1a/cx30.3/cx28.9
GO:0032592	integral component of mitochondrial membrane	4	0.498929	0.999992	0.885871	rhot1a/agk/zgc:165532/fundc2
GO:0044437	vacuolar part	10	0.504168	0.999992	0.885871	hgsnat/hm13/map1lc3b/napab/ccz1/ltv1/slc48a1a/depdc5/mfsd8/rragca
GO:0033267	axon part	3	0.504489	0.999992	0.885871	cpeb4a/sptan1/exoc4
GO:0005764	lysosome	13	0.505618	0.999992	0.885871	hgsnat/hm13/ctsla/gnsb/zgc:63831/ccz1/slc48a1a/zgc:103438/ctss2.1/depdc5/mfsd8/rragca/si:dkey-183k8.2
GO:0005938	cell cortex	6	0.506585	0.999992	0.885871	exoc4/exoc3l4/exoc3l2b/tnfaip2a/arhgap33/fryb
GO:0005942	phosphatidylinositol 3-kinase complex	2	0.512223	0.999992	0.885871	pik3cb/pik3cg
GO:0000323	lytic vacuole	13	0.526411	0.999992	0.885871	hgsnat/hm13/ctsla/gnsb/zgc:63831/ccz1/slc48a1a/zgc:103438/ctss2.1/depdc5/mfsd8/rragca/si:dkey-183k8.2
GO:0005776	autophagosome	3	0.527041	0.999992	0.885871	atg9a/map1lc3b/optn
GO:0016592	mediator complex	3	0.527041	0.999992	0.885871	med14/cdk8/med13b
GO:0000407	phagophore assembly site	2	0.540328	0.999992	0.885871	atg9a/atg13
GO:0005758	mitochondrial intermembrane space	3	0.549011	0.999992	0.885871	agk/thop1/timm10b
GO:0031970	organelle envelope lumen	3	0.549011	0.999992	0.885871	agk/thop1/timm10b
GO:0005765	lysosomal membrane	6	0.552507	0.999992	0.885871	hgsnat/hm13/ccz1/slc48a1a/depdc5/mfsd8
GO:0098852	lytic vacuole membrane	6	0.552507	0.999992	0.885871	hgsnat/hm13/ccz1/slc48a1a/depdc5/mfsd8
GO:0005773	vacuole	18	0.562771	0.999992	0.885871	atg9a/hgsnat/hm13/ctsla/map1lc3b/napab/gnsb/optn/zgc:63831/ccz1/ltv1/slc48a1a/zgc:103438/ctss2.1/depdc5/mfsd8/rragca/si:dkey-183k8.2
GO:0030027	lamellipodium	2	0.567288	0.999992	0.885871	cyfip1/srgap2
GO:0031902	late endosome membrane	3	0.570367	0.999992	0.885871	vps36/chmp4bb/ltv1
GO:0036064	ciliary basal body	4	0.574148	0.999992	0.885871	rilpl2/wdr5/ift20/tapt1b
GO:0005657	replication fork	3	0.591085	0.999992	0.885871	zgc:173742/top1l/si:dkey-28b4.7
GO:0030131	clathrin adaptor complex	2	0.593086	0.999992	0.885871	ap3m1/gga1
GO:0030136	clathrin-coated vesicle	2	0.593086	0.999992	0.885871	si:ch211-200p22.4/hip1
GO:0030496	midbody	2	0.593086	0.999992	0.885871	ankrd54/katna1
GO:0005579	membrane attack complex	1	0.605079	0.999992	0.885871	c7b
GO:0005680	anaphase-promoting complex	1	0.605079	0.999992	0.885871	ube2s
GO:0005847	mRNA cleavage and polyadenylation specificity factor complex	1	0.605079	0.999992	0.885871	wdr33
GO:0005859	muscle myosin complex	1	0.605079	0.999992	0.885871	mybpc1
GO:0005881	cytoplasmic microtubule	1	0.605079	0.999992	0.885871	reep2
GO:0016282	eukaryotic 43S preinitiation complex	1	0.605079	0.999992	0.885871	eif3jb
GO:0016460	myosin II complex	1	0.605079	0.999992	0.885871	mybpc1
GO:0016605	PML body	1	0.605079	0.999992	0.885871	sumo3a
GO:0019773	proteasome core complex, alpha-subunit complex	1	0.605079	0.999992	0.885871	psma6l
GO:0030894	replisome	1	0.605079	0.999992	0.885871	si:dkey-28b4.7
GO:0033116	endoplasmic reticulum-Golgi intermediate compartment membrane	1	0.605079	0.999992	0.885871	sec22ba
GO:0043601	nuclear replisome	1	0.605079	0.999992	0.885871	si:dkey-28b4.7
GO:0005819	spindle	6	0.610473	0.999992	0.885871	tbccd1/ndel1a/klhl21/ska2/ckap5/katna1
GO:0005922	connexin complex	3	0.611145	0.999992	0.885871	cx43/cx30.3/cx28.9
GO:0042613	MHC class II protein complex	3	0.611145	0.999992	0.885871	zgc:103700/mhc2dab/mhc2b
GO:0150034	distal axon	2	0.617715	0.999992	0.885871	cpeb4a/exoc4
GO:0005871	kinesin complex	5	0.624506	0.999992	0.885871	stard9/kif1b/klc1a/ndel1a/kifc3
GO:0005743	mitochondrial inner membrane	21	0.629104	0.999992	0.885871	si:dkey-251i10.1/si:dkey-13i19.8/agk/slc25a32a/slc25a39/timm50/atp5mc3a/bcs1l/mpv17l2/slc25a36a/timm8a/pmpca/timm44/zgc:165532/timm10b/timm29/ndufa2/grpel1/abcb7/hccsb/yme1l1a
GO:0098562	cytoplasmic side of membrane	10	0.629148	0.999992	0.885871	ptk2bb/hm13/gnai2b/gnai2a/csk/dab2ipb/rasa1b/tnk1/frk/rasal3
GO:0055037	recycling endosome	3	0.630533	0.999992	0.885871	optn/atp11c/rab11a
GO:0098802	plasma membrane receptor complex	7	0.637476	0.999992	0.885871	dlg1/chrne/dlg1l/itgb1a/itgb2/itga1/itgb7
GO:0005903	brush border	1	0.640129	0.999992	0.885871	slc34a2a
GO:0030867	rough endoplasmic reticulum membrane	1	0.640129	0.999992	0.885871	sec61b
GO:0032806	carboxy-terminal domain protein kinase complex	1	0.640129	0.999992	0.885871	gtf2h2
GO:0042575	DNA polymerase complex	1	0.640129	0.999992	0.885871	si:dkey-28b4.7
GO:0098687	chromosomal region	7	0.649793	0.999992	0.885871	xrcc6/ndel1a/nup133/dscc1/ska2/ckap5/cfdp1
GO:0030425	dendrite	3	0.667263	0.999992	0.885871	cpeb4a/casc3/srgap2
GO:0097447	dendritic tree	3	0.667263	0.999992	0.885871	cpeb4a/casc3/srgap2
GO:0031082	BLOC complex	1	0.672069	0.999992	0.885871	snap47
GO:0031083	BLOC-1 complex	1	0.672069	0.999992	0.885871	snap47
GO:0033290	eukaryotic 48S preinitiation complex	1	0.672069	0.999992	0.885871	eif3jb
GO:0046930	pore complex	1	0.672069	0.999992	0.885871	c7b
GO:0070993	translation preinitiation complex	1	0.672069	0.999992	0.885871	eif3jb
GO:0031300	intrinsic component of organelle membrane	9	0.681096	0.999992	0.885871	zgc:162183/rhot1a/agk/sypl2a/zgc:165532/pex11g/mfn2/slc35b3/fundc2
GO:0012506	vesicle membrane	8	0.682713	0.999992	0.885871	atg9a/dia1b/copb2/copg2/copb1/snx9a/sypl2a/snx17
GO:0030659	cytoplasmic vesicle membrane	8	0.682713	0.999992	0.885871	atg9a/dia1b/copb2/copg2/copb1/snx9a/sypl2a/snx17
GO:0008074	guanylate cyclase complex, soluble	2	0.684673	0.999992	0.885871	npr2/adcy6b
GO:0098805	whole membrane	32	0.689128	0.999992	0.885871	dia1b/hgsnat/bcl2l1/copb2/hm13/copg2/map1lc3b/bnip3la/napab/rhot1a/vps36/copb1/ccz1/zgc:56235/rtn4ip1/sypl2a/qtrt2/chmp4bb/cav2/ltv1/slc48a1a/park7/miga1/ankzf1/depdc5/pex11g/mfsd8/mief1/mfn2/rragca/cptp/fundc2
GO:0009898	cytoplasmic side of plasma membrane	9	0.691233	0.999992	0.885871	ptk2bb/gnai2b/gnai2a/csk/dab2ipb/rasa1b/tnk1/frk/rasal3
GO:0031463	Cul3-RING ubiquitin ligase complex	5	0.694648	0.999992	0.885871	klhl21/spopla/spoplb/bach1a/klhl24a
GO:0000276	mitochondrial proton-transporting ATP synthase complex, coupling factor F(o)	1	0.701177	0.999992	0.885871	atp5mc3a
GO:0000421	autophagosome membrane	1	0.701177	0.999992	0.885871	map1lc3b
GO:0005791	rough endoplasmic reticulum	1	0.701177	0.999992	0.885871	sec61b
GO:0005901	caveola	1	0.701177	0.999992	0.885871	cav2
GO:0030014	CCR4-NOT complex	1	0.701177	0.999992	0.885871	cnot1
GO:0036452	ESCRT complex	1	0.701177	0.999992	0.885871	vps36
GO:0042734	presynaptic membrane	1	0.701177	0.999992	0.885871	cdh2
GO:0044853	plasma membrane raft	1	0.701177	0.999992	0.885871	cav2
GO:0005884	actin filament	2	0.704746	0.999992	0.885871	pls1/fscn1a
GO:0031304	intrinsic component of mitochondrial inner membrane	2	0.704746	0.999992	0.885871	agk/zgc:165532
GO:0031305	integral component of mitochondrial inner membrane	2	0.704746	0.999992	0.885871	agk/zgc:165532
GO:0008328	ionotropic glutamate receptor complex	2	0.723743	0.999992	0.885871	dlg1/dlg1l
GO:0030118	clathrin coat	2	0.723743	0.999992	0.885871	ap3m1/gga1
GO:0098878	neurotransmitter receptor complex	2	0.723743	0.999992	0.885871	dlg1/dlg1l
GO:0044433	cytoplasmic vesicle part	15	0.726892	0.999992	0.885871	atg9a/dia1b/copb2/hm13/copg2/vps36/copb1/snx9a/sypl2a/chmp4bb/ltv1/slc48a1a/snx17/rragca/cptp
GO:0005868	cytoplasmic dynein complex	1	0.727702	0.999992	0.885871	dync1i2b
GO:0030992	intraciliary transport particle B	1	0.727702	0.999992	0.885871	ift20
GO:0031256	leading edge membrane	1	0.727702	0.999992	0.885871	panx1a
GO:0042383	sarcolemma	1	0.727702	0.999992	0.885871	ilk
GO:0045263	proton-transporting ATP synthase complex, coupling factor F(o)	1	0.727702	0.999992	0.885871	atp5mc3a
GO:0019866	organelle inner membrane	22	0.73813	0.999992	0.885871	si:dkey-251i10.1/si:dkey-13i19.8/agk/dpy19l1l/slc25a32a/slc25a39/timm50/atp5mc3a/bcs1l/mpv17l2/slc25a36a/timm8a/pmpca/timm44/zgc:165532/timm10b/timm29/ndufa2/grpel1/abcb7/hccsb/yme1l1a
GO:0043235	receptor complex	9	0.738837	0.999992	0.885871	dlg1/tgfbr2b/chrne/dlg1l/itgb1a/itgb2/abcg2c/itga1/itgb7
GO:0031982	vesicle	37	0.741031	0.999992	0.885871	appl2/atg9a/dia1b/copb2/sec22ba/flot2a/hm13/copg2/rbmx/vps36/optn/copb1/fgfr2/atp11c/snx9a/ccz1/sypl2a/cops5/itm2bb/chmp4bb/ltv1/slc48a1a/rab10/rab11a/slc30a9/rab12/srgap2/sgk3/si:ch211-200p22.4/snx17/appl1/rragca/slc34a2a/epha4a/sytl1/cptp/hip1
GO:0005885	Arp2/3 protein complex	1	0.751874	0.999992	0.885871	arpc5lb
GO:0042470	melanosome	1	0.751874	0.999992	0.885871	sec22ba
GO:0048770	pigment granule	1	0.751874	0.999992	0.885871	sec22ba
GO:1902562	H4 histone acetyltransferase complex	1	0.751874	0.999992	0.885871	ruvbl1
GO:1990391	DNA repair complex	1	0.751874	0.999992	0.885871	msh6
GO:0045211	postsynaptic membrane	6	0.7563	0.999992	0.885871	dlg1/cpeb4a/chrne/dlg1l/srgap2/grik1a
GO:0030173	integral component of Golgi membrane	2	0.758638	0.999992	0.885871	zgc:162183/slc35b3
GO:0031228	intrinsic component of Golgi membrane	2	0.758638	0.999992	0.885871	zgc:162183/slc35b3
GO:0098791	Golgi subcompartment	24	0.760879	0.999992	0.885871	zgc:162183/zgc:165582/copb2/copg2/nras/b3gnt5a/copb1/golga5/pitpnbl/yipf6/cav2/mgat4b/pxylp1/rab30/golph3/asah2/galnt1/fut11/cnsta/galnt2/slc35b3/glg1a/b3gnt2l/rhbdf1a
GO:0005769	early endosome	3	0.761159	0.999992	0.885871	snx17/appl1/epha4a
GO:0005604	basement membrane	1	0.773902	0.999992	0.885871	lamc1
GO:0005753	mitochondrial proton-transporting ATP synthase complex	1	0.773902	0.999992	0.885871	atp5mc3a
GO:0031430	M band	1	0.773902	0.999992	0.885871	mybpc1
GO:0000139	Golgi membrane	20	0.774194	0.999992	0.885871	zgc:162183/zgc:165582/copb2/copg2/nras/b3gnt5a/copb1/golga5/yipf6/cav2/mgat4b/pxylp1/asah2/galnt1/fut11/galnt2/slc35b3/glg1a/b3gnt2l/rhbdf1a
GO:0098800	inner mitochondrial membrane protein complex	7	0.777062	0.999992	0.885871	agk/timm50/atp5mc3a/timm10b/timm29/ndufa2/grpel1
GO:0031301	integral component of organelle membrane	8	0.778836	0.999992	0.885871	zgc:162183/rhot1a/agk/sypl2a/zgc:165532/pex11g/slc35b3/fundc2
GO:0097060	synaptic membrane	7	0.785916	0.999992	0.885871	dlg1/cdh2/cpeb4a/chrne/dlg1l/srgap2/grik1a
GO:0019897	extrinsic component of plasma membrane	8	0.787149	0.999992	0.885871	ptk2bb/cdh2/gnai2b/gnai2a/csk/sec14l8/tnk1/frk
GO:0005814	centriole	2	0.78965	0.999992	0.885871	cep83/ift20
GO:0000784	nuclear chromosome, telomeric region	1	0.793975	0.999992	0.885871	xrcc6
GO:0005793	endoplasmic reticulum-Golgi intermediate compartment	1	0.793975	0.999992	0.885871	sec22ba
GO:0031410	cytoplasmic vesicle	33	0.806219	0.999992	0.885871	appl2/atg9a/dia1b/copb2/sec22ba/flot2a/hm13/copg2/vps36/optn/copb1/fgfr2/atp11c/snx9a/sypl2a/cops5/chmp4bb/ltv1/slc48a1a/rab10/rab11a/slc30a9/rab12/srgap2/sgk3/si:ch211-200p22.4/snx17/appl1/rragca/epha4a/sytl1/cptp/hip1
GO:0097708	intracellular vesicle	33	0.806219	0.999992	0.885871	appl2/atg9a/dia1b/copb2/sec22ba/flot2a/hm13/copg2/vps36/optn/copb1/fgfr2/atp11c/snx9a/sypl2a/cops5/chmp4bb/ltv1/slc48a1a/rab10/rab11a/slc30a9/rab12/srgap2/sgk3/si:ch211-200p22.4/snx17/appl1/rragca/epha4a/sytl1/cptp/hip1
GO:0000307	cyclin-dependent protein kinase holoenzyme complex	1	0.812268	0.999992	0.885871	ccnt2b
GO:0005892	acetylcholine-gated channel complex	1	0.812268	0.999992	0.885871	chrne
GO:0098862	cluster of actin-based cell projections	1	0.812268	0.999992	0.885871	slc34a2a
GO:0005874	microtubule	10	0.819214	0.999992	0.885871	mid1ip1l/mapre1b/tuba8l/ndel1a/klhl21/ska2/ckap5/katna1/kifc3/reep2
GO:0044440	endosomal part	6	0.820554	0.999992	0.885871	vps36/chmp4bb/ltv1/slc48a1a/rragca/cptp
GO:0044431	Golgi apparatus part	25	0.823825	0.999992	0.885871	zgc:162183/zgc:165582/dia1b/copb2/copg2/nras/b3gnt5a/copb1/golga5/pitpnbl/yipf6/cav2/mgat4b/pxylp1/rab30/golph3/asah2/galnt1/fut11/cnsta/galnt2/slc35b3/glg1a/b3gnt2l/rhbdf1a
GO:0005882	intermediate filament	4	0.830852	0.999992	0.885871	zgc:158846/lmna/krt97/krt4
GO:0005770	late endosome	3	0.832355	0.999992	0.885871	vps36/chmp4bb/ltv1
GO:0030424	axon	3	0.832355	0.999992	0.885871	cpeb4a/sptan1/exoc4
GO:0045111	intermediate filament cytoskeleton	4	0.839784	0.999992	0.885871	zgc:158846/lmna/krt97/krt4
GO:0022627	cytosolic small ribosomal subunit	2	0.841282	0.999992	0.885871	rps23/rps15
GO:0032580	Golgi cisterna membrane	2	0.841282	0.999992	0.885871	zgc:165582/fut11
GO:0098794	postsynapse	6	0.843639	0.999992	0.885871	dlg1/cpeb4a/chrne/dlg1l/srgap2/grik1a
GO:0030990	intraciliary transport particle	1	0.844127	0.999992	0.885871	ift20
GO:0044420	extracellular matrix component	1	0.844127	0.999992	0.885871	lamc1
GO:0005768	endosome	15	0.848661	0.999992	0.885871	appl2/flot2a/vps36/optn/atp11c/chmp4bb/ltv1/slc48a1a/rab11a/rab12/snx17/appl1/rragca/epha4a/cptp
GO:0030286	dynein complex	2	0.852255	0.999992	0.885871	dync1i2b/si:dkeyp-86b9.1
GO:0045259	proton-transporting ATP synthase complex	1	0.857969	0.999992	0.885871	atp5mc3a
GO:0072686	mitotic spindle	1	0.857969	0.999992	0.885871	katna1
GO:0005777	peroxisome	3	0.86055	0.999992	0.885871	ehhadh/pmvk/pex11g
GO:0042579	microbody	3	0.86055	0.999992	0.885871	ehhadh/pmvk/pex11g
GO:0005913	cell-cell adherens junction	2	0.862533	0.999992	0.885871	si:ch73-22o12.1/plekha7a
GO:0010008	endosome membrane	5	0.863212	0.999992	0.885871	vps36/chmp4bb/ltv1/slc48a1a/cptp
GO:0098590	plasma membrane region	15	0.867116	0.999992	0.885871	mfsd4b/dlg1/cdh2/cse1l/panx1a/cpeb4a/cav2/acy3.2/chrne/asah2/dlg1l/srgap2/abcg2c/slc34a2a/grik1a
GO:0005778	peroxisomal membrane	1	0.870582	0.999992	0.885871	pex11g
GO:0031672	A band	1	0.870582	0.999992	0.885871	mybpc1
GO:0031903	microbody membrane	1	0.870582	0.999992	0.885871	pex11g
GO:0046658	anchored component of plasma membrane	1	0.870582	0.999992	0.885871	gpc4
GO:0005815	microtubule organizing center	12	0.875036	0.999992	0.885871	rilpl2/cep83/tbccd1/ndel1a/wdr5/ift20/ckap5/ccdc88c/katna1/tapt1b/ppp4cb/plekha7a
GO:0005813	centrosome	7	0.87807	0.999992	0.885871	rilpl2/ndel1a/ift20/ckap5/ccdc88c/tapt1b/plekha7a
GO:0030018	Z disc	2	0.881146	0.999992	0.885871	ilk/mybpc1
GO:0000781	chromosome, telomeric region	1	0.882076	0.999992	0.885871	xrcc6
GO:0031234	extrinsic component of cytoplasmic side of plasma membrane	6	0.88256	0.999992	0.885871	ptk2bb/gnai2b/gnai2a/csk/tnk1/frk
GO:0099568	cytoplasmic region	7	0.88354	0.999992	0.885871	ift20/exoc4/exoc3l4/exoc3l2b/tnfaip2a/arhgap33/fryb
GO:0099513	polymeric cytoskeletal fiber	16	0.887969	0.999992	0.885871	zgc:158846/lmna/mid1ip1l/pls1/mapre1b/tuba8l/ndel1a/klhl21/krt97/ska2/ckap5/katna1/fscn1a/kifc3/reep2/krt4
GO:0005747	mitochondrial respiratory chain complex I	1	0.89255	0.999992	0.885871	ndufa2
GO:0030964	NADH dehydrogenase complex	1	0.89255	0.999992	0.885871	ndufa2
GO:0044438	microbody part	1	0.89255	0.999992	0.885871	pex11g
GO:0044439	peroxisomal part	1	0.89255	0.999992	0.885871	pex11g
GO:0045271	respiratory chain complex I	1	0.89255	0.999992	0.885871	ndufa2
GO:0036477	somatodendritic compartment	3	0.904698	0.999992	0.885871	cpeb4a/casc3/srgap2
GO:0044450	microtubule organizing center part	2	0.911569	0.999992	0.885871	cep83/ift20
GO:0045121	membrane raft	2	0.911569	0.999992	0.885871	cav2/park7
GO:0098589	membrane region	2	0.911569	0.999992	0.885871	cav2/park7
GO:0098857	membrane microdomain	2	0.911569	0.999992	0.885871	cav2/park7
GO:0005875	microtubule associated complex	7	0.916345	0.999992	0.885871	stard9/kif1b/klc1a/ndel1a/dync1i2b/kifc3/si:dkeyp-86b9.1
GO:0033177	proton-transporting two-sector ATPase complex, proton-transporting domain	1	0.918716	0.999992	0.885871	atp5mc3a
GO:0000786	nucleosome	4	0.923941	0.999992	0.885871	h1f0/h1fx/sos1/hp1bp3
GO:0005637	nuclear inner membrane	1	0.925937	0.999992	0.885871	dpy19l1l
GO:0031674	I band	2	0.929416	0.999992	0.885871	ilk/mybpc1
GO:0030141	secretory granule	1	0.932517	0.999992	0.885871	rab10
GO:0019898	extrinsic component of membrane	10	0.933875	0.999992	0.885871	pik3cb/ptk2bb/cdh2/gnai2b/gnai2a/pik3cg/csk/sec14l8/tnk1/frk
GO:0005834	heterotrimeric G-protein complex	2	0.934568	0.999992	0.885871	gnai2b/gnai2a
GO:1905360	GTPase complex	2	0.934568	0.999992	0.885871	gnai2b/gnai2a
GO:0098552	side of membrane	10	0.936712	0.999992	0.885871	ptk2bb/hm13/gnai2b/gnai2a/csk/dab2ipb/rasa1b/tnk1/frk/rasal3
GO:0005891	voltage-gated calcium channel complex	1	0.938513	0.999992	0.885871	cacna1ha
GO:0044815	DNA packaging complex	4	0.940309	0.999992	0.885871	h1f0/h1fx/sos1/hp1bp3
GO:0005581	collagen trimer	3	0.94388	0.999992	0.885871	mbl2/col2a1b/plod3
GO:0031253	cell projection membrane	1	0.943976	0.999992	0.885871	panx1a
GO:0000793	condensed chromosome	3	0.947556	0.999992	0.885871	nup133/ska2/cfdp1
GO:0034704	calcium channel complex	1	0.953491	0.999992	0.885871	cacna1ha
GO:0032993	protein-DNA complex	5	0.959444	0.999992	0.885871	h1f0/h1fx/sos1/hp1bp3/si:dkey-28b4.7
GO:0015630	microtubule cytoskeleton	26	0.962069	0.999992	0.885871	rilpl2/cep83/tbccd1/stard9/eml3/mid1ip1l/mapre1b/tuba8l/kif1b/klc1a/ndel1a/klhl21/wdr5/ift20/ska2/ckap5/ccdc88c/katna1/tapt1b/dync1i2b/ppp4cb/si:ch73-217b7.1/kifc3/reep2/si:dkeyp-86b9.1/plekha7a
GO:0030672	synaptic vesicle membrane	1	0.964822	0.999992	0.885871	sypl2a
GO:0031225	anchored component of membrane	1	0.964822	0.999992	0.885871	gpc4
GO:0099501	exocytic vesicle membrane	1	0.964822	0.999992	0.885871	sypl2a
GO:0070382	exocytic vesicle	3	0.969829	0.999992	0.885871	sypl2a/cops5/sytl1
GO:0005746	mitochondrial respiratory chain	2	0.97419	0.999992	0.885871	si:dkey-13i19.8/ndufa2
GO:0043005	neuron projection	10	0.980443	0.999992	0.885871	gpr1/cyfip1/cpeb4a/casc3/sptan1/srgap2/exoc4/camk2b1/limk1a/camk2g1
GO:0099503	secretory vesicle	4	0.982338	0.999992	0.885871	sypl2a/cops5/rab10/sytl1
GO:0008021	synaptic vesicle	2	0.982649	0.999992	0.885871	sypl2a/cops5
GO:0005930	axoneme	1	0.984783	0.999992	0.885871	ift20
GO:0097014	ciliary plasm	1	0.986136	0.999992	0.885871	ift20
GO:0044456	synapse part	10	0.98695	0.999992	0.885871	dlg1/cdh2/sypl2a/cops5/cpeb4a/chrne/dlg1l/srgap2/snap47/grik1a
GO:0045202	synapse	13	0.987955	0.999992	0.885871	dlg1/ache/cdh2/cyfip1/sypl2a/cops5/cpeb4a/chrne/dlg1l/srgap2/exoc4/snap47/grik1a
GO:0032838	plasma membrane bounded cell projection cytoplasm	1	0.989516	0.999992	0.885871	ift20
GO:0097458	neuron part	17	0.990132	0.999992	0.885871	gpr1/dlg1/actl6a/cdh2/cyfip1/sypl2a/cops5/cpeb4a/casc3/dlg1l/sptan1/srgap2/exoc4/camk2b1/limk1a/snap47/camk2g1
GO:1990351	transporter complex	8	0.990387	0.999992	0.885871	si:zfos-323e3.4/dlg1/clic4/clic5b/chrne/dlg1l/timm10b/cacna1ha
GO:0016469	proton-transporting two-sector ATPase complex	1	0.990449	0.999992	0.885871	atp5mc3a
GO:0098797	plasma membrane protein complex	20	0.990784	0.999992	0.885871	zgc:103700/dlg1/cx43/cdh2/b2m/mhc2dab/gnai2b/gnai2a/mhc2b/aph1b/cx30.3/chrne/cx28.9/dlg1l/itgb1a/itgb2/cacna1ha/c7b/itga1/itgb7
GO:0034702	ion channel complex	7	0.990858	0.999992	0.885871	si:zfos-323e3.4/dlg1/clic4/clic5b/chrne/dlg1l/cacna1ha
GO:0070469	respiratory chain	2	0.990894	0.999992	0.885871	si:dkey-13i19.8/ndufa2
GO:0098793	presynapse	4	0.991626	0.999992	0.885871	cdh2/sypl2a/cops5/snap47
GO:0099080	supramolecular complex	18	0.992329	0.999992	0.885871	zgc:158846/lmna/mid1ip1l/pls1/mapre1b/tuba8l/ilk/ndel1a/klhl21/krt97/ska2/mybpc1/ckap5/katna1/fscn1a/kifc3/reep2/krt4
GO:0099081	supramolecular polymer	18	0.992329	0.999992	0.885871	zgc:158846/lmna/mid1ip1l/pls1/mapre1b/tuba8l/ilk/ndel1a/klhl21/krt97/ska2/mybpc1/ckap5/katna1/fscn1a/kifc3/reep2/krt4
GO:0099512	supramolecular fiber	18	0.992329	0.999992	0.885871	zgc:158846/lmna/mid1ip1l/pls1/mapre1b/tuba8l/ilk/ndel1a/klhl21/krt97/ska2/mybpc1/ckap5/katna1/fscn1a/kifc3/reep2/krt4
GO:0044463	cell projection part	10	0.993049	0.999992	0.885871	rilpl2/panx1a/cpeb4a/casc3/wdr5/ift20/sptan1/srgap2/tapt1b/exoc4
GO:0120038	plasma membrane bounded cell projection part	10	0.993049	0.999992	0.885871	rilpl2/panx1a/cpeb4a/casc3/wdr5/ift20/sptan1/srgap2/tapt1b/exoc4
GO:1902495	transmembrane transporter complex	7	0.994655	0.999992	0.885871	si:zfos-323e3.4/dlg1/clic4/clic5b/chrne/dlg1l/cacna1ha
GO:0098803	respiratory chain complex	1	0.995025	0.999992	0.885871	ndufa2
GO:0009986	cell surface	5	0.996113	0.999992	0.885871	zgc:171500/si:dkey-71b5.7/si:dkey-19a16.7/sdc2/si:dkey-19a16.4
GO:0030658	transport vesicle membrane	1	0.997156	0.999992	0.885871	sypl2a
GO:1990204	oxidoreductase complex	1	0.997156	0.999992	0.885871	ndufa2
GO:0030133	transport vesicle	3	0.998335	0.999992	0.885871	sypl2a/cops5/sytl1
GO:0030017	sarcomere	2	0.998522	0.999992	0.885871	ilk/mybpc1
GO:0044441	ciliary part	4	0.998868	0.999992	0.885871	rilpl2/wdr5/ift20/tapt1b
GO:0030016	myofibril	2	0.999029	0.999992	0.885871	ilk/mybpc1
GO:0043292	contractile fiber	2	0.999108	0.999992	0.885871	ilk/mybpc1
GO:0044449	contractile fiber part	2	0.999108	0.999992	0.885871	ilk/mybpc1
GO:0120025	plasma membrane bounded cell projection	17	0.999845	0.999992	0.885871	gpr1/rilpl2/cyfip1/panx1a/cpeb4a/casc3/wdr5/ift20/tln1/cobl/sptan1/srgap2/tapt1b/exoc4/camk2b1/limk1a/camk2g1
GO:0005578	proteinaceous extracellular matrix	4	0.999882	0.999992	0.885871	gpc4/lamc1/cyr61l2/lgals3bpa
GO:0042995	cell projection	17	0.99992	0.999992	0.885871	gpr1/rilpl2/cyfip1/panx1a/cpeb4a/casc3/wdr5/ift20/tln1/cobl/sptan1/srgap2/tapt1b/exoc4/camk2b1/limk1a/camk2g1
GO:0031012	extracellular matrix	7	0.999934	0.999992	0.885871	gpc4/lamc1/coch/cyr61l2/fbln2/ahsg2/lgals3bpa
GO:0034703	cation channel complex	1	0.999976	0.999992	0.885871	cacna1ha
GO:0005929	cilium	4	0.999992	0.999992	0.885871	rilpl2/wdr5/ift20/tapt1b

## Sheet: BP HARA F0F1
	Description	Count	pvalue	p.adjust	qvalue	geneID
GO:0042254	ribosome biogenesis	81	6.7859e-32	1.7209e-28	1.57433e-28	dis3/nhp2/rpl24/pwp2h/diexf/pes/wdr43/wdr3/snu13b/nop2/rrp36/ftsj3/wdr36/gnl3/rpl7l1/mphosph10/lsg1/tsr1/rrp15/nol6/heatr1/ebna1bp2/pak1ip1/rpl7/rps15/rrs1/wdr75/eif6/dcaf13/utp6/imp3/nat10/exosc4/heatr3/gar1/surf6/nop56/kri1/rrp9/bxdc2/fbl/abce1/mtrex/znf622/rpl11/rpf1/ltv1/gtpbp10/nop16/mpv17l2/sart1/ddx51/ddx56/polr1d/utp3/nop58/nmd3/exosc2/mrto4/bms1/si:dkey-251i10.3/nle1/nip7/pop4/trmt112/no…
GO:0022613	ribonucleoprotein complex biogenesis	95	2.00003e-29	2.53603e-26	2.32003e-26	gemin8/dis3/nhp2/rpl24/snrpd1/pwp2h/diexf/pes/wdr43/ruvbl1/wdr3/snu13b/nop2/rrp36/ftsj3/wdr36/gnl3/rpl7l1/mphosph10/lsg1/atxn2l/tsr1/rrp15/nol6/heatr1/ebna1bp2/pak1ip1/rpl7/rps15/rrs1/wdr75/eif6/dcaf13/utp6/imp3/cdc73/prpf31/nat10/exosc4/heatr3/gar1/surf6/nop56/kri1/rrp9/bxdc2/eif4h/fbl/abce1/rbm22/mtrex/eif3jb/znf622/rpl11/rpf1/ltv1/gtpbp10/nop16/mpv17l2/sart1/ddx51/ddx56/polr1d/utp3/cnot1/txnl4…
GO:0006364	rRNA processing	57	2.08639e-24	1.76369e-21	1.61347e-21	dis3/nhp2/pwp2h/diexf/pes/wdr3/snu13b/nop2/rrp36/ftsj3/wdr36/gnl3/rpl7l1/mphosph10/tsr1/rrp15/nol6/heatr1/ebna1bp2/rpl7/rrs1/wdr75/eif6/dcaf13/utp6/imp3/nat10/exosc4/gar1/nop56/kri1/rrp9/fbl/mtrex/rpf1/sart1/ddx51/ddx56/utp3/nop58/exosc2/mrto4/bms1/si:dkey-251i10.3/pop4/trmt112/noc4l/rpusd2/tfb2m/dkc1/emg1/ncl/tfb1m/bop1/mrm3b/gnl2/pdcd11
GO:0016072	rRNA metabolic process	57	1.00839e-22	6.39319e-20	5.84866e-20	dis3/nhp2/pwp2h/diexf/pes/wdr3/snu13b/nop2/rrp36/ftsj3/wdr36/gnl3/rpl7l1/mphosph10/tsr1/rrp15/nol6/heatr1/ebna1bp2/rpl7/rrs1/wdr75/eif6/dcaf13/utp6/imp3/nat10/exosc4/gar1/nop56/kri1/rrp9/fbl/mtrex/rpf1/sart1/ddx51/ddx56/utp3/nop58/exosc2/mrto4/bms1/si:dkey-251i10.3/pop4/trmt112/noc4l/rpusd2/tfb2m/dkc1/emg1/ncl/tfb1m/bop1/mrm3b/gnl2/pdcd11
GO:0034470	ncRNA processing	70	7.84745e-20	3.98023e-17	3.64122e-17	dis3/nhp2/mettl3/pwp2h/diexf/pes/wdr3/snu13b/nop2/rrp36/ftsj3/wdr36/gnl3/rpl7l1/mphosph10/tsr1/nsun2/rrp15/nol6/heatr1/ebna1bp2/rpl7/rrs1/wdr75/eif6/dcaf13/utp6/imp3/nat10/exosc4/gar1/nop56/qtrt2/kri1/rrp9/fbl/mtrex/rpf1/sart1/ctu2/ddx51/ddx56/utp3/ftsj1/elac2/pus1/nop58/pop5/trmt13/exosc2/mrto4/bms1/si:dkey-251i10.3/trit1/pop4/trmt112/noc4l/elp2/ints1/rpusd2/tfb2m/wdr4/dkc1/emg1/ncl/tfb1m/bop1/m…
GO:0034660	ncRNA metabolic process	81	2.18976e-19	9.25538e-17	8.46707e-17	dis3/nhp2/mettl3/pwp2h/diexf/pes/wdr3/snu13b/nop2/rrp36/ftsj3/wdr36/gnl3/rpl7l1/mphosph10/tsr1/nsun2/rrp15/nol6/heatr1/ebna1bp2/rpl7/rars/rrs1/mars/yars/cars/wdr75/eif6/dcaf13/utp6/imp3/nat10/exosc4/gar1/qars/nop56/qtrt2/kri1/rrp9/fbl/mtrex/rpf1/sart1/ctu2/ddx51/ddx56/sars/hars/utp3/ftsj1/elac2/pus1/nop58/pop5/trmt13/exosc2/mrto4/bms1/si:dkey-251i10.3/trit1/pop4/trmt112/noc4l/rpap2/elp2/trim71/in…
GO:0042273	ribosomal large subunit biogenesis	26	7.844e-13	2.84177e-10	2.59973e-10	nhp2/rpl24/pes/snu13b/nop2/ftsj3/rpl7l1/rrp15/ebna1bp2/pak1ip1/rpl7/rrs1/eif6/heatr3/surf6/bxdc2/znf622/rpl11/rpf1/nop16/mrto4/nle1/nip7/noc2l/bop1/gnl2
GO:0008380	RNA splicing	49	1.51055e-09	4.54725e-07	4.15994e-07	gemin8/mettl3/magoh/dhx37/rbm10/ncbp2/snrpd1/ddx19/phf5a/snu13b/prpf40a/rbmx/nono/ddx5/snrpa/ddx39aa/rbm25b/dhx16/gpkow/smu1a/prpf31/eftud2/akap17a/rbm17/eif4a3/u2af2b/casc3/ddx39ab/srsf1a/hmga1a/rbm22/srsf2a/sf3b3/rbfox1l/rbpms2a/sart1/zmat5/bud31/sf3a3/txnl4a/rbm8a/nova2/rbmx2/ddx20/si:dkey-156n14.5/cwc22/sf3b2/smndc1/txnl4b
GO:0000377	RNA splicing, via transesterification reactions with bulged adenosine as nucleophile	39	1.79308e-09	4.54725e-07	4.15994e-07	gemin8/mettl3/magoh/dhx37/rbm10/ncbp2/snrpd1/phf5a/snu13b/prpf40a/rbmx/nono/ddx5/snrpa/ddx39aa/rbm25b/dhx16/gpkow/smu1a/prpf31/eftud2/eif4a3/ddx39ab/rbm22/sf3b3/rbfox1l/rbpms2a/sart1/bud31/sf3a3/txnl4a/rbm8a/nova2/rbmx2/ddx20/si:dkey-156n14.5/cwc22/sf3b2/txnl4b
GO:0000398	mRNA splicing, via spliceosome	39	1.79308e-09	4.54725e-07	4.15994e-07	gemin8/mettl3/magoh/dhx37/rbm10/ncbp2/snrpd1/phf5a/snu13b/prpf40a/rbmx/nono/ddx5/snrpa/ddx39aa/rbm25b/dhx16/gpkow/smu1a/prpf31/eftud2/eif4a3/ddx39ab/rbm22/sf3b3/rbfox1l/rbpms2a/sart1/bud31/sf3a3/txnl4a/rbm8a/nova2/rbmx2/ddx20/si:dkey-156n14.5/cwc22/sf3b2/txnl4b
GO:0000375	RNA splicing, via transesterification reactions	39	2.20485e-09	5.08318e-07	4.65023e-07	gemin8/mettl3/magoh/dhx37/rbm10/ncbp2/snrpd1/phf5a/snu13b/prpf40a/rbmx/nono/ddx5/snrpa/ddx39aa/rbm25b/dhx16/gpkow/smu1a/prpf31/eftud2/eif4a3/ddx39ab/rbm22/sf3b3/rbfox1l/rbpms2a/sart1/bud31/sf3a3/txnl4a/rbm8a/nova2/rbmx2/ddx20/si:dkey-156n14.5/cwc22/sf3b2/txnl4b
GO:0006397	mRNA processing	53	2.88074e-09	5.90644e-07	5.40337e-07	gemin8/mettl3/magoh/dhx37/aurkaip1/rbm27/rbm10/ncbp2/snrpd1/phf5a/snu13b/prpf40a/rbmx/nono/ddx5/snrpa/ddx39aa/cpsf6/rbm25b/dhx16/gpkow/smu1a/cdc73/prpf31/eftud2/eif4a3/u2af2b/casc3/ddx39ab/srsf1a/rbm22/sf3b3/rbfox1l/rbpms2a/sart1/zmat5/bud31/sf3a3/gpatch1/wdr33/txnl4a/rbm8a/nova2/rbmx2/ddx20/si:dkey-156n14.5/cwc22/sf3b2/smndc1/hnrnpl2/txnl4b/supt5h/pdcd11
GO:0030490	maturation of SSU-rRNA	19	3.02775e-09	5.90644e-07	5.40337e-07	pwp2h/diexf/wdr3/snu13b/rrp36/mphosph10/tsr1/heatr1/rrs1/dcaf13/utp6/nat10/kri1/utp3/bms1/si:dkey-251i10.3/noc4l/emg1/pdcd11
GO:0016071	mRNA metabolic process	65	7.10239e-09	1.28655e-06	1.17697e-06	gemin8/mettl3/magoh/dhx37/aurkaip1/rbm27/rbm10/ncbp2/snrpd1/phf5a/snu13b/prpf40a/rbmx/nono/ddx5/snrpa/ddx39aa/cpsf6/rbm25b/dhx16/gpkow/smu1a/cdc73/prpf31/eftud2/exosc4/eif4a3/u2af2b/casc3/ddx39ab/srsf1a/rbm22/sf3b3/rbfox1l/rbpms2a/sart1/zmat5/bud31/sf3a3/gpatch1/cnot1/wdr33/txnl4a/polr2i/pus1/rbm8a/exosc2/mrto4/nova2/rbmx2/pop4/ddx20/si:dkey-156n14.5/csdc2b/a1cf/cwc22/dcp1b/supv3l1/sf3b2/smndc1/h…
GO:0042274	ribosomal small subunit biogenesis	22	1.00437e-08	1.69806e-06	1.55343e-06	pwp2h/diexf/wdr3/snu13b/rrp36/mphosph10/tsr1/heatr1/rps15/rrs1/dcaf13/utp6/nat10/surf6/kri1/ltv1/utp3/bms1/si:dkey-251i10.3/noc4l/emg1/pdcd11
GO:0000462	maturation of SSU-rRNA from tricistronic rRNA transcript (SSU-rRNA, 5.8S rRNA, LSU-rRNA)	15	6.07705e-08	9.63213e-06	8.81173e-06	pwp2h/diexf/wdr3/rrp36/tsr1/heatr1/rrs1/dcaf13/utp6/kri1/utp3/bms1/noc4l/emg1/pdcd11
GO:0009451	RNA modification	27	7.5532e-08	1.12676e-05	1.03079e-05	nhp2/mettl3/nop2/ftsj3/nsun2/nat10/gar1/nop56/qtrt2/pus7/trub2/ctu2/ftsj1/pus1/nop58/trit1/trmt112/elp2/a1cf/rbm47/rpusd2/naf1/tfb2m/wdr4/dkc1/emg1/tfb1m
GO:0010501	RNA secondary structure unwinding	16	8.29861e-08	1.16918e-05	1.0696e-05	ddx19/ddx54/ddx3b/ddx18/ddx5/ddx39aa/ddx27/ddx49/eif4a3/ddx39ab/ddx51/ddx56/ddx24/ddx20/si:dkey-156n14.5/ddx10
GO:0044265	cellular macromolecule catabolic process	82	9.79578e-08	1.30748e-05	1.19612e-05	ube2g1b/uba7/march6/endog/dis3/mettl3/magoh/rnf139/ube4b/ncbp2/psmb5/psme3/rock2a/ctsla/psmc6/psmd11b/cul1a/ube2d1b/cul3a/plaa/usp24/ube2g1a/fbxw11a/heatr1/vps36/cul2/sdf2/ube2h/psmd6/exosc4/cdc34a/eif4a3/casc3/trib3/uba1/uchl5/fbxw5/lgmn/mtrex/cul1b/psmd8/crbn/cnot1/zgc:103438/rnf24/nsfl1c/rbm8a/psmd11a/spopla/erlin1/exosc2/psmd4b/mrto4/ankzf1/psme4b/ngly1/uchl3/ctss2.1/csdc2b/spoplb/nedd4l/usp1…
GO:0030163	protein catabolic process	70	1.04341e-07	1.32304e-05	1.21035e-05	ube2g1b/uba7/march6/rnf139/clpxb/ube4b/oaz1a/diexf/apoeb/psmb5/psme3/rock2a/ctsla/psmc6/psmd11b/cul1a/ube2d1b/cul3a/plaa/usp24/ube2g1a/fbxw11a/vps36/cul2/zgc:63831/sdf2/ube2h/psmd6/cdc34a/trib3/uba1/uchl5/fbxw5/lgmn/cul1b/psmd8/crbn/zgc:103438/rnf24/nsfl1c/psmd11a/spopla/erlin1/psmd4b/ankzf1/psme4b/apoea/ngly1/uchl3/ctss2.1/spoplb/nedd4l/usp12b/lonrf1/rlim/lonp1/usp38/usp2b/ube2s/ankib1a/si:ch211…
GO:0000154	rRNA modification	13	1.1431e-07	1.38043e-05	1.26286e-05	nhp2/nop2/ftsj3/nat10/gar1/nop56/nop58/trmt112/rpusd2/tfb2m/dkc1/emg1/tfb1m
GO:0000460	maturation of 5.8S rRNA	13	3.44716e-07	3.92155e-05	3.58754e-05	pes/ftsj3/gnl3/rrp15/rrs1/eif6/kri1/mtrex/rpf1/exosc2/bop1/gnl2/pdcd11
GO:0000470	maturation of LSU-rRNA	12	3.55661e-07	3.92155e-05	3.58754e-05	nhp2/pes/snu13b/nop2/ftsj3/rpl7l1/rrp15/rpl7/eif6/rpf1/bop1/gnl2
GO:0044257	cellular protein catabolic process	64	8.94881e-07	9.45591e-05	8.65051e-05	ube2g1b/uba7/march6/rnf139/ube4b/psmb5/psme3/rock2a/ctsla/psmc6/psmd11b/cul1a/ube2d1b/cul3a/plaa/usp24/ube2g1a/fbxw11a/vps36/cul2/sdf2/ube2h/psmd6/cdc34a/trib3/uba1/uchl5/fbxw5/lgmn/cul1b/psmd8/crbn/zgc:103438/rnf24/nsfl1c/psmd11a/spopla/erlin1/psmd4b/ankzf1/psme4b/ngly1/uchl3/ctss2.1/spoplb/nedd4l/usp12b/lonrf1/rlim/lonp1/usp38/usp2b/ube2s/ankib1a/si:ch211-284e13.9/si:dkey-82j4.2/cul3b/foxred2/u…
GO:0051603	proteolysis involved in cellular protein catabolic process	63	1.29392e-06	0.000131255	0.000120075	ube2g1b/uba7/march6/rnf139/ube4b/psmb5/psme3/ctsla/psmc6/psmd11b/cul1a/ube2d1b/cul3a/plaa/usp24/ube2g1a/fbxw11a/vps36/cul2/sdf2/ube2h/psmd6/cdc34a/trib3/uba1/uchl5/fbxw5/lgmn/cul1b/psmd8/crbn/zgc:103438/rnf24/nsfl1c/psmd11a/spopla/erlin1/psmd4b/ankzf1/psme4b/ngly1/uchl3/ctss2.1/spoplb/nedd4l/usp12b/lonrf1/rlim/lonp1/usp38/usp2b/ube2s/ankib1a/si:ch211-284e13.9/si:dkey-82j4.2/cul3b/foxred2/usp37/ym…
GO:0006403	RNA localization	22	5.28453e-06	0.000515445	0.000471543	magoh/ncbp2/ddx39aa/cpsf6/nol6/rrs1/kif1b/eif6/eif4a3/casc3/ddx39ab/abce1/nupl2/nup133/ltv1/thoc3/rbm8a/nmd3/exosc2/rbmx2/xpot/sidt2
GO:0043632	modification-dependent macromolecule catabolic process	53	8.46089e-06	0.000794697	0.00072701	ube2g1b/uba7/march6/rnf139/ube4b/psmb5/psmc6/psmd11b/cul1a/ube2d1b/cul3a/plaa/usp24/ube2g1a/fbxw11a/vps36/cul2/ube2h/psmd6/cdc34a/trib3/uba1/uchl5/fbxw5/cul1b/psmd8/crbn/rnf24/nsfl1c/psmd11a/spopla/erlin1/exosc2/psmd4b/ankzf1/uchl3/spoplb/nedd4l/usp12b/lonrf1/rlim/lonp1/usp38/usp2b/ube2s/ankib1a/si:ch211-284e13.9/si:dkey-82j4.2/cul3b/foxred2/usp37/ube2a/psma6l
GO:0019941	modification-dependent protein catabolic process	52	1.01107e-05	0.000915741	0.000837745	ube2g1b/uba7/march6/rnf139/ube4b/psmb5/psmc6/psmd11b/cul1a/ube2d1b/cul3a/plaa/usp24/ube2g1a/fbxw11a/vps36/cul2/ube2h/psmd6/cdc34a/trib3/uba1/uchl5/fbxw5/cul1b/psmd8/crbn/rnf24/nsfl1c/psmd11a/spopla/erlin1/psmd4b/ankzf1/uchl3/spoplb/nedd4l/usp12b/lonrf1/rlim/lonp1/usp38/usp2b/ube2s/ankib1a/si:ch211-284e13.9/si:dkey-82j4.2/cul3b/foxred2/usp37/ube2a/psma6l
GO:0000466	maturation of 5.8S rRNA from tricistronic rRNA transcript (SSU-rRNA, 5.8S rRNA, LSU-rRNA)	9	1.09184e-05	0.000954799	0.000873476	pes/ftsj3/gnl3/rrs1/kri1/exosc2/bop1/gnl2/pdcd11
GO:0050657	nucleic acid transport	20	1.2952e-05	0.00105956	0.000969313	magoh/ncbp2/ddx39aa/cpsf6/nol6/rrs1/eif6/eif4a3/casc3/ddx39ab/abce1/nupl2/nup133/ltv1/thoc3/rbm8a/nmd3/rbmx2/xpot/sidt2
GO:0050658	RNA transport	20	1.2952e-05	0.00105956	0.000969313	magoh/ncbp2/ddx39aa/cpsf6/nol6/rrs1/eif6/eif4a3/casc3/ddx39ab/abce1/nupl2/nup133/ltv1/thoc3/rbm8a/nmd3/rbmx2/xpot/sidt2
GO:0043484	regulation of RNA splicing	14	1.40016e-05	0.00110962	0.00101511	magoh/dhx37/rbm10/rbmx/rbm25b/smu1a/akap17a/rbm17/eif4a3/hmga1a/rbm22/srsf2a/rbfox1l/rbm8a
GO:0051236	establishment of RNA localization	20	1.59913e-05	0.00122891	0.00112424	magoh/ncbp2/ddx39aa/cpsf6/nol6/rrs1/eif6/eif4a3/casc3/ddx39ab/abce1/nupl2/nup133/ltv1/thoc3/rbm8a/nmd3/rbmx2/xpot/sidt2
GO:0015931	nucleobase-containing compound transport	22	1.74829e-05	0.00127478	0.0011662	magoh/slc29a1b/ncbp2/ddx39aa/cpsf6/nol6/rrs1/eif6/eif4a3/casc3/ddx39ab/abce1/nupl2/nup133/ltv1/slc25a36a/thoc3/rbm8a/nmd3/rbmx2/xpot/sidt2
GO:0006511	ubiquitin-dependent protein catabolic process	51	1.75935e-05	0.00127478	0.0011662	ube2g1b/uba7/march6/rnf139/ube4b/psmb5/psmc6/psmd11b/cul1a/ube2d1b/cul3a/plaa/usp24/ube2g1a/fbxw11a/vps36/cul2/ube2h/psmd6/cdc34a/trib3/uba1/uchl5/fbxw5/cul1b/psmd8/crbn/rnf24/nsfl1c/psmd11a/spopla/erlin1/psmd4b/ankzf1/uchl3/spoplb/nedd4l/usp12b/lonrf1/rlim/usp38/usp2b/ube2s/ankib1a/si:ch211-284e13.9/si:dkey-82j4.2/cul3b/foxred2/usp37/ube2a/psma6l
GO:0006913	nucleocytoplasmic transport	23	2.3094e-05	0.00158287	0.00144805	ncbp2/cse1l/anp32b/nup50/lsg1/ddx39aa/cpsf6/nol6/rrs1/eif6/heatr3/ddx39ab/abce1/nup133/ipo9/ltv1/thoc3/nmd3/rbmx2/ipo4/xpot/tprb/kpna1
GO:0051169	nuclear transport	23	2.3094e-05	0.00158287	0.00144805	ncbp2/cse1l/anp32b/nup50/lsg1/ddx39aa/cpsf6/nol6/rrs1/eif6/heatr3/ddx39ab/abce1/nup133/ipo9/ltv1/thoc3/nmd3/rbmx2/ipo4/xpot/tprb/kpna1
GO:0006325	chromatin organization	55	2.71949e-05	0.0018149	0.00166032	ctr9/hdac1/actl6a/smarca5/ruvbl1/h1f0/setb/rbbp4/prmt1/anp32b/h1fx/seta/rnf2/smarca2/zgc:173742/nap1l4a/chd1l/cdc73/prdm9/hdac3/smarcc1a/dnajc2/leo1/fbl/aebp2/nup133/kdm5bb/ing2/naa50/carm1/kat5b/smyd2a/psme4b/top1l/tbl1xr1a/hp1bp3/smarca1/riox1/mysm1/suz12b/supt16h/sin3aa/ep300b/crebbpa/crebbpb/chd3/usp16/supv3l1/noc2l/ezh1/dek/ino80b/bahcc1b/rrp8/ube2a
GO:0042752	regulation of circadian rhythm	7	2.99149e-05	0.00194523	0.00177955	cry1aa/cipca/cipcb/per2/per1b/nr1d1/si:ch211-132b12.7
GO:0006338	chromatin remodeling	17	4.99263e-05	0.00315754	0.0028886	actl6a/smarca5/ruvbl1/rbbp4/anp32b/smarca2/zgc:173742/chd1l/smarcc1a/psme4b/top1l/smarca1/riox1/mysm1/dek/ino80b/bahcc1b
GO:0000469	cleavage involved in rRNA processing	9	5.10486e-05	0.00315754	0.0028886	nhp2/rrp36/gnl3/tsr1/rrs1/kri1/exosc2/bms1/gnl2
GO:0001522	pseudouridine synthesis	8	5.98732e-05	0.0036152	0.00330728	nhp2/gar1/pus7/trub2/pus1/rpusd2/naf1/dkc1
GO:0006413	translational initiation	19	8.13425e-05	0.00479731	0.00438871	mettl3/ddx3b/eif5/eif1axb/eif2s2/brf1a/eif4a1a/eif6/zgc:56676/eif4e2rs1/eif4h/abce1/eif3jb/eif2b1/eif4ebp3/eif4e1c/eif3hb/eif4ea/eif4ebp1
GO:0000463	maturation of LSU-rRNA from tricistronic rRNA transcript (SSU-rRNA, 5.8S rRNA, LSU-rRNA)	6	9.41787e-05	0.00542812	0.00496579	pes/ftsj3/rpl7l1/rpl7/bop1/gnl2
GO:0019433	triglyceride catabolic process	7	0.000109712	0.00618289	0.00565627	pnpla2/apoeb/apoa4b.1/pnpla3/apoea/apoa4b.2/si:dkey-7f3.14
GO:0022618	ribonucleoprotein complex assembly	26	0.000147272	0.00811917	0.00742763	gemin8/rpl24/snrpd1/pwp2h/ruvbl1/atxn2l/rps15/eif6/cdc73/prpf31/bxdc2/eif4h/rbm22/eif3jb/rpl11/rpf1/mpv17l2/sart1/cnot1/txnl4a/mrto4/nle1/nip7/ddx20/shq1/txnl4b
GO:0000381	regulation of alternative mRNA splicing, via spliceosome	8	0.000157216	0.00848299	0.00776046	magoh/rbm10/rbmx/rbm25b/smu1a/eif4a3/rbfox1l/rbm8a
GO:0045834	positive regulation of lipid metabolic process	8	0.000240843	0.0127245	0.0116407	pnpla2/apoeb/apoa4b.1/pnpla3/cnep1r1/apoea/apoa4b.2/si:dkey-7f3.14
GO:0048024	regulation of mRNA splicing, via spliceosome	9	0.000252202	0.0130528	0.011941	magoh/dhx37/rbm10/rbmx/rbm25b/smu1a/eif4a3/rbfox1l/rbm8a
GO:0051168	nuclear export	15	0.000283319	0.0143699	0.013146	ncbp2/lsg1/ddx39aa/cpsf6/nol6/rrs1/eif6/ddx39ab/abce1/nup133/ltv1/thoc3/nmd3/rbmx2/xpot
GO:0031503	protein-containing complex localization	19	0.000314578	0.0156425	0.0143102	dlg1/ddx39aa/nol6/rrs1/eif6/klhl21/ddx39ab/abce1/nup133/ift20/ltv1/thoc3/dlg1l/nmd3/rbmx2/xpot/exoc3l4/exoc3l2b/tnfaip2a
GO:0000380	alternative mRNA splicing, via spliceosome	8	0.000357639	0.0174418	0.0159562	magoh/rbm10/rbmx/rbm25b/smu1a/eif4a3/rbfox1l/rbm8a
GO:0006405	RNA export from nucleus	14	0.000447814	0.0210307	0.0192394	ncbp2/ddx39aa/cpsf6/nol6/rrs1/eif6/ddx39ab/abce1/nup133/ltv1/thoc3/nmd3/rbmx2/xpot
GO:0090501	RNA phosphodiester bond hydrolysis	14	0.000447814	0.0210307	0.0192394	nhp2/rrp36/gnl3/tsr1/cpsf6/rrs1/kri1/wdr33/polr2i/elac2/exosc2/bms1/pop4/gnl2
GO:0046461	neutral lipid catabolic process	7	0.000484532	0.0219424	0.0200735	pnpla2/apoeb/apoa4b.1/pnpla3/apoea/apoa4b.2/si:dkey-7f3.14
GO:0046464	acylglycerol catabolic process	7	0.000484532	0.0219424	0.0200735	pnpla2/apoeb/apoa4b.1/pnpla3/apoea/apoa4b.2/si:dkey-7f3.14
GO:0071826	ribonucleoprotein complex subunit organization	26	0.000494302	0.0219921	0.020119	gemin8/rpl24/snrpd1/pwp2h/ruvbl1/atxn2l/rps15/eif6/cdc73/prpf31/bxdc2/eif4h/rbm22/eif3jb/rpl11/rpf1/mpv17l2/sart1/cnot1/txnl4a/mrto4/nle1/nip7/ddx20/shq1/txnl4b
GO:0006399	tRNA metabolic process	25	0.000588362	0.0257256	0.0235345	nsun2/rars/mars/yars/cars/nat10/qars/qtrt2/fbl/ctu2/sars/hars/ftsj1/elac2/pus1/pop5/trmt13/exosc2/trit1/pop4/trmt112/elp2/polr3b/nars/wdr4
GO:0006595	polyamine metabolic process	6	0.000602511	0.0258978	0.023692	oaz2a/oaz1a/azin1b/srm/sat1b/amd1
GO:0046503	glycerolipid catabolic process	7	0.000729847	0.0308482	0.0282208	pnpla2/apoeb/apoa4b.1/pnpla3/apoea/apoa4b.2/si:dkey-7f3.14
GO:0015748	organophosphate ester transport	11	0.000761711	0.0316672	0.02897	atp8a2/apoeb/apoa4b.1/atp11c/slc37a2/pitpnbl/slc25a36a/apoea/apoa4b.2/si:dkey-7f3.14/atp10d
GO:1901361	organic cyclic compound catabolic process	36	0.000813378	0.0332698	0.0304361	endog/dis3/mettl3/magoh/aldh1l1/ncbp2/apoeb/pgam1a/cnp/heatr1/exosc4/eif4a3/nudt3a/aldh4a1/si:ch73-71d17.1/casc3/mtrex/cnot1/zgc:103559/upp1/rbm8a/exosc2/pfklb/mrto4/afmid/apoea/gda/si:ch211-201h21.5/csdc2b/xdh/dcp1b/aox6/supv3l1/gck/hmox1a/dnase1l1
GO:0006641	triglyceride metabolic process	9	0.000880138	0.0348755	0.031905	pnpla2/apoeb/apoa4b.1/pnpla3/gpat3/cnep1r1/apoea/apoa4b.2/si:dkey-7f3.14
GO:0009308	amine metabolic process	9	0.000880138	0.0348755	0.031905	oaz2a/oaz1a/azin1b/srm/afmid/aoc1/sat1b/slc7a7/amd1
GO:0071166	ribonucleoprotein complex localization	11	0.000955076	0.036254	0.0331661	ddx39aa/nol6/rrs1/eif6/ddx39ab/abce1/ltv1/thoc3/nmd3/rbmx2/xpot
GO:0071426	ribonucleoprotein complex export from nucleus	11	0.000955076	0.036254	0.0331661	ddx39aa/nol6/rrs1/eif6/ddx39ab/abce1/ltv1/thoc3/nmd3/rbmx2/xpot
GO:0090207	regulation of triglyceride metabolic process	6	0.000972111	0.036254	0.0331661	pnpla2/apoa4b.1/pnpla3/cnep1r1/apoa4b.2/si:dkey-7f3.14
GO:0090208	positive regulation of triglyceride metabolic process	6	0.000972111	0.036254	0.0331661	pnpla2/apoa4b.1/pnpla3/cnep1r1/apoa4b.2/si:dkey-7f3.14
GO:0043628	ncRNA 3'-end processing	7	0.00106388	0.0385429	0.0352601	gnl3/exosc4/fbl/elac2/exosc2/ints1/dkc1
GO:0046040	IMP metabolic process	7	0.00106388	0.0385429	0.0352601	ampd2a/adssl/ampd3b/adsl/hprt1/adss/ppat
GO:0000479	endonucleolytic cleavage of tricistronic rRNA transcript (SSU-rRNA, 5.8S rRNA, LSU-rRNA)	5	0.00114236	0.0408033	0.037328	tsr1/rrs1/kri1/bms1/gnl2
GO:0006611	protein export from nucleus	11	0.00118726	0.0412451	0.0377321	ddx39aa/nol6/rrs1/eif6/ddx39ab/abce1/ltv1/thoc3/nmd3/rbmx2/xpot
GO:0042255	ribosome assembly	11	0.00118726	0.0412451	0.0377321	rpl24/pwp2h/rps15/eif6/bxdc2/rpl11/rpf1/mpv17l2/mrto4/nle1/nip7
GO:0001510	RNA methylation	10	0.00120575	0.0413214	0.0378019	mettl3/nop2/ftsj3/nsun2/ftsj1/trmt112/tfb2m/wdr4/emg1/tfb1m
GO:0046700	heterocycle catabolic process	34	0.00137293	0.0464232	0.0424692	endog/dis3/mettl3/magoh/aldh1l1/ncbp2/pgam1a/cnp/heatr1/exosc4/eif4a3/nudt3a/aldh4a1/si:ch73-71d17.1/casc3/mtrex/cnot1/zgc:103559/upp1/rbm8a/exosc2/pfklb/mrto4/afmid/gda/si:ch211-201h21.5/csdc2b/xdh/dcp1b/aox6/supv3l1/gck/hmox1a/dnase1l1
GO:0016569	covalent chromatin modification	33	0.00139589	0.0465787	0.0426115	ctr9/hdac1/smarca5/ruvbl1/rbbp4/prmt1/rnf2/cdc73/prdm9/hdac3/dnajc2/leo1/fbl/aebp2/kdm5bb/ing2/naa50/carm1/kat5b/smyd2a/tbl1xr1a/smarca1/riox1/mysm1/suz12b/sin3aa/ep300b/crebbpa/crebbpb/usp16/noc2l/ezh1/ube2a
GO:0031123	RNA 3'-end processing	11	0.00146393	0.0479591	0.0438743	gnl3/cpsf6/cdc73/exosc4/fbl/wdr33/elac2/exosc2/ints1/supv3l1/dkc1
GO:0031167	rRNA methylation	6	0.001494	0.0479591	0.0438743	nop2/ftsj3/trmt112/tfb2m/emg1/tfb1m
GO:0090502	RNA phosphodiester bond hydrolysis, endonucleolytic	6	0.001494	0.0479591	0.0438743	tsr1/rrs1/kri1/elac2/bms1/gnl2
GO:0090305	nucleic acid phosphodiester bond hydrolysis	16	0.00159382	0.0485914	0.0444527	endog/nhp2/rrp36/gnl3/tsr1/cpsf6/rrs1/kri1/wdr33/polr2i/elac2/exosc2/bms1/pop4/dcp1b/gnl2
GO:0044106	cellular amine metabolic process	8	0.00180546	0.0485914	0.0444527	oaz2a/oaz1a/azin1b/srm/afmid/sat1b/slc7a7/amd1
GO:0010498	proteasomal protein catabolic process	31	0.00184407	0.0485914	0.0444527	march6/rnf139/ube4b/psmb5/psme3/psmc6/plaa/fbxw11a/sdf2/psmd6/cdc34a/trib3/fbxw5/psmd8/crbn/rnf24/nsfl1c/spopla/erlin1/psmd4b/ankzf1/psme4b/spoplb/lonrf1/rlim/ube2s/ankib1a/si:ch211-284e13.9/foxred2/ube2a/rhbdf1a
GO:0006638	neutral lipid metabolic process	9	0.00191243	0.0485914	0.0444527	pnpla2/apoeb/apoa4b.1/pnpla3/gpat3/cnep1r1/apoea/apoa4b.2/si:dkey-7f3.14
GO:0006639	acylglycerol metabolic process	9	0.00191243	0.0485914	0.0444527	pnpla2/apoeb/apoa4b.1/pnpla3/gpat3/cnep1r1/apoea/apoa4b.2/si:dkey-7f3.14
GO:0000478	endonucleolytic cleavage involved in rRNA processing	5	0.00193523	0.0485914	0.0444527	tsr1/rrs1/kri1/bms1/gnl2
GO:0010872	regulation of cholesterol esterification	5	0.00193523	0.0485914	0.0444527	apoeb/apoa4b.1/apoea/apoa4b.2/si:dkey-7f3.14
GO:0010873	positive regulation of cholesterol esterification	5	0.00193523	0.0485914	0.0444527	apoeb/apoa4b.1/apoea/apoa4b.2/si:dkey-7f3.14
GO:0010896	regulation of triglyceride catabolic process	5	0.00193523	0.0485914	0.0444527	pnpla2/apoa4b.1/pnpla3/apoa4b.2/si:dkey-7f3.14
GO:0010898	positive regulation of triglyceride catabolic process	5	0.00193523	0.0485914	0.0444527	pnpla2/apoa4b.1/pnpla3/apoa4b.2/si:dkey-7f3.14
GO:0033700	phospholipid efflux	5	0.00193523	0.0485914	0.0444527	apoeb/apoa4b.1/apoea/apoa4b.2/si:dkey-7f3.14
GO:0034367	protein-containing complex remodeling	5	0.00193523	0.0485914	0.0444527	apoeb/apoa4b.1/apoea/apoa4b.2/si:dkey-7f3.14
GO:0034368	protein-lipid complex remodeling	5	0.00193523	0.0485914	0.0444527	apoeb/apoa4b.1/apoea/apoa4b.2/si:dkey-7f3.14
GO:0034369	plasma lipoprotein particle remodeling	5	0.00193523	0.0485914	0.0444527	apoeb/apoa4b.1/apoea/apoa4b.2/si:dkey-7f3.14
GO:0034370	triglyceride-rich lipoprotein particle remodeling	5	0.00193523	0.0485914	0.0444527	apoeb/apoa4b.1/apoea/apoa4b.2/si:dkey-7f3.14
GO:0034372	very-low-density lipoprotein particle remodeling	5	0.00193523	0.0485914	0.0444527	apoeb/apoa4b.1/apoea/apoa4b.2/si:dkey-7f3.14
GO:0034377	plasma lipoprotein particle assembly	5	0.00193523	0.0485914	0.0444527	apoeb/apoa4b.1/apoea/apoa4b.2/si:dkey-7f3.14
GO:0034380	high-density lipoprotein particle assembly	5	0.00193523	0.0485914	0.0444527	apoeb/apoa4b.1/apoea/apoa4b.2/si:dkey-7f3.14
GO:0065005	protein-lipid complex assembly	5	0.00193523	0.0485914	0.0444527	apoeb/apoa4b.1/apoea/apoa4b.2/si:dkey-7f3.14
GO:0071825	protein-lipid complex subunit organization	5	0.00193523	0.0485914	0.0444527	apoeb/apoa4b.1/apoea/apoa4b.2/si:dkey-7f3.14
GO:0071827	plasma lipoprotein particle organization	5	0.00193523	0.0485914	0.0444527	apoeb/apoa4b.1/apoea/apoa4b.2/si:dkey-7f3.14
GO:0097006	regulation of plasma lipoprotein particle levels	5	0.00193523	0.0485914	0.0444527	apoeb/apoa4b.1/apoea/apoa4b.2/si:dkey-7f3.14
GO:0006144	purine nucleobase metabolic process	7	0.00208177	0.0517584	0.04735	zgc:174895/aprt/zgc:103559/gda/xdh/aox6/ppat
GO:0071466	cellular response to xenobiotic stimulus	11	0.00217575	0.0532461	0.0487109	cyp1a/sult6b1/sult1st1/nfe2l2a/sult1st3/cyb5a/nt5c2l1/csad/sult1st5/hmox1a/sort1b
GO:0009891	positive regulation of biosynthetic process	48	0.00220259	0.0532461	0.0487109	mettl3/si:ch211-153b23.7/tcf20/maml3/apoeb/elf1/egr1/tefa/prox1a/nr5a2/ccnt2b/psmc6/rbmx/ddx5/apoa4b.1/cnbpa/heatr1/nfe2l2a/stat4/stat5a/chuk/maff/cdc73/dnajc2/leo1/eif5a2/creb3l3l/junba/gtf2f2a/pxylp1/hif1al2/erlin1/cnep1r1/apoea/creb3l3a/nfia/si:dkey-156n14.5/tp53bp1/mysm1/supt16h/usp16/apoa4b.2/si:dkey-7f3.14/runx3/supt5h/nfixb/foxn3/relb
GO:0046889	positive regulation of lipid biosynthetic process	6	0.00220459	0.0532461	0.0487109	apoeb/apoa4b.1/cnep1r1/apoea/apoa4b.2/si:dkey-7f3.14
GO:0040007	growth	49	0.0023684	0.0566594	0.0518335	llph/dia1b/npr2/aldh1a2/gpc4/appb/hdac1/diexf/ntn1a/cx43/cdh2/apoeb/tgfbr2b/stat3/ruvbl1/scfd1/rap1b/rbbp4/cyfip1/nrp1a/kif1b/hspa9/osgn1/igfbp5b/igfbp3/tnfrsf1a/lgmn/mtrex/epb41l3b/rap1aa/cnot1/cyr61l2/apoea/katna1/sec14l8/sgk2b/plxnb1a/sema5a/socs2/sgk3/chd3/plxnb1b/supv3l1/creb1a/epha4a/mgat5/clstn1/notch1b/igfbp2b
GO:0009116	nucleoside metabolic process	16	0.0024143	0.0566594	0.0518335	zgc:174895/tymp/prps1a/impdh2/ctps1a/adkb/uck2b/impdh1b/aprt/qtrt2/hprt1/upp1/si:ch211-201h21.5/ppat/pnp5a/amd1
GO:0043094	cellular metabolic compound salvage	9	0.00241678	0.0566594	0.0518335	zgc:174895/ampd2a/adkb/uck2b/ampd3b/aprt/hprt1/enoph1/upp1
GO:0044270	cellular nitrogen compound catabolic process	33	0.00243528	0.0566594	0.0518335	endog/dis3/mettl3/magoh/aldh1l1/ncbp2/pgam1a/cnp/heatr1/exosc4/eif4a3/nudt3a/si:ch73-71d17.1/casc3/mtrex/cnot1/zgc:103559/upp1/rbm8a/exosc2/pfklb/mrto4/afmid/gda/si:ch211-201h21.5/csdc2b/xdh/dcp1b/aox6/supv3l1/gck/hmox1a/dnase1l1
GO:0048863	stem cell differentiation	30	0.00282342	0.0642622	0.0587888	mettl3/ctr9/aldh1l1/jag1a/hdac1/cdh2/tgfbr2b/nr5a2/pparda/wdr43/psmd11b/cnbpa/polr1a/med14/fgfr2/nrp1a/leo1/rcc2/glrx2/sf3a3/psmd11a/plod3/fscn1a/tapt1b/mych/ncor2/lrsam1/med13b/supt5h/foxc1b
GO:0016049	cell growth	25	0.00300074	0.0642622	0.0587888	llph/gpc4/appb/ntn1a/apoeb/cyfip1/nrp1a/kif1b/osgn1/igfbp5b/igfbp3/epb41l3b/cyr61l2/apoea/katna1/sgk2b/plxnb1a/sema5a/socs2/sgk3/plxnb1b/supv3l1/epha4a/clstn1/igfbp2b
GO:0015914	phospholipid transport	9	0.00302115	0.0642622	0.0587888	atp8a2/apoeb/apoa4b.1/atp11c/pitpnbl/apoea/apoa4b.2/si:dkey-7f3.14/atp10d
GO:0019752	carboxylic acid metabolic process	60	0.00305468	0.0642622	0.0587888	ehhadh/gls2a/sgpl1/mlycd/npl/aldh1l1/aldh1a2/cbsb/ldha/ldhba/azin1b/ctps1a/apoa4b.1/arg2/pgam1a/sephs1/mdh1ab/elovl4b/hagh/rars/mars/yars/cars/glud1b/rdh10b/cyp2k22/kyat3/cyp2k18/aldh4a1/hibadhb/asns/qars/si:ch73-71d17.1/acot16/mdh2/ddc/pdha1a/fpgs/enoph1/aclya/sars/hars/csad/me3/acss1/pfklb/afmid/acot11a/gls2b/acot18/tat/zgc:172341/nars/apoa4b.2/si:dkey-7f3.14/acot17/slc7a7/mgst2/gck/acsf2
GO:0000054	ribosomal subunit export from nucleus	5	0.00306614	0.0642622	0.0587888	rrs1/eif6/abce1/ltv1/nmd3
GO:0033750	ribosome localization	5	0.00306614	0.0642622	0.0587888	rrs1/eif6/abce1/ltv1/nmd3
GO:0034433	steroid esterification	5	0.00306614	0.0642622	0.0587888	apoeb/apoa4b.1/apoea/apoa4b.2/si:dkey-7f3.14
GO:0034434	sterol esterification	5	0.00306614	0.0642622	0.0587888	apoeb/apoa4b.1/apoea/apoa4b.2/si:dkey-7f3.14
GO:0034435	cholesterol esterification	5	0.00306614	0.0642622	0.0587888	apoeb/apoa4b.1/apoea/apoa4b.2/si:dkey-7f3.14
GO:0043691	reverse cholesterol transport	5	0.00306614	0.0642622	0.0587888	apoeb/apoa4b.1/apoea/apoa4b.2/si:dkey-7f3.14
GO:0045940	positive regulation of steroid metabolic process	5	0.00306614	0.0642622	0.0587888	apoeb/apoa4b.1/apoea/apoa4b.2/si:dkey-7f3.14
GO:0050996	positive regulation of lipid catabolic process	5	0.00306614	0.0642622	0.0587888	pnpla2/apoa4b.1/pnpla3/apoa4b.2/si:dkey-7f3.14
GO:0043101	purine-containing compound salvage	6	0.0031428	0.0653291	0.0597648	zgc:174895/ampd2a/adkb/ampd3b/aprt/hprt1
GO:0032259	methylation	28	0.00317816	0.0654247	0.0598523	mettl3/mettl2a/ctr9/nop2/ftsj3/prmt1/setd6/nsun2/prmt5/prdm9/gnmt/eef1akmt1/ntmt1/fbl/carm1/ftsj1/smyd2a/trmt112/comta/nsd1b/kmt2cb/tfb2m/wdr4/ezh1/emg1/ndufaf7/tfb1m/mrm3b
GO:0006886	intracellular protein transport	51	0.003199	0.0654247	0.0598523	rilpl2/si:ch211-208k15.1/copb2/oaz1a/ap3m1/copg2/cse1l/nup50/ddx39aa/napab/slc9a3r1a/agk/nol6/vps36/rrs1/copb1/snx9a/ssr1/eif6/snx15/timm50/heatr3/srp54/ddx39ab/abce1/nup133/ipo9/ipo11/ltv1/thoc3/stam2/pmpca/timm44/nmd3/stx6/rbmx2/ipo4/rabgap1l/xpot/tprb/grpel1/exoc4/ap3d1/mief1/snx17/kpna1/sytl1/sec61b/si:dkey-238d18.4/gga1/ssr2
GO:0019439	aromatic compound catabolic process	33	0.00328606	0.0666676	0.0609893	endog/dis3/mettl3/magoh/aldh1l1/ncbp2/pgam1a/cnp/heatr1/exosc4/eif4a3/nudt3a/si:ch73-71d17.1/casc3/mtrex/cnot1/zgc:103559/upp1/rbm8a/exosc2/pfklb/mrto4/afmid/gda/si:ch211-201h21.5/csdc2b/xdh/dcp1b/aox6/supv3l1/gck/hmox1a/dnase1l1
GO:0009410	response to xenobiotic stimulus	13	0.0033542	0.0667249	0.0610417	ache/cyp1a/esr1/sult6b1/sult1st1/nfe2l2a/sult1st3/cyb5a/nt5c2l1/csad/sult1st5/hmox1a/sort1b
GO:0051254	positive regulation of RNA metabolic process	44	0.00336288	0.0667249	0.0610417	mettl3/si:ch211-153b23.7/tcf20/dhx37/maml3/elf1/egr1/tefa/prox1a/nr5a2/ccnt2b/psmc6/rbmx/ddx5/cnbpa/heatr1/nfe2l2a/stat4/stat5a/chuk/maff/cdc73/dnajc2/leo1/rbm22/creb3l3l/junba/gtf2f2a/cnot1/hif1al2/erlin1/creb3l3a/nfia/si:dkey-156n14.5/tp53bp1/mysm1/supt16h/usp16/supv3l1/runx3/supt5h/nfixb/foxn3/relb
GO:0045892	negative regulation of transcription, DNA-templated	34	0.00342044	0.0667249	0.0610417	cry1aa/cipca/cipcb/id2a/rxrba/smad2/id2b/rnf2/nkap/hes6/ncor1/hdac3/junba/hic1/sars/cnot1/smyd2a/pbxip1b/nfia/cica/riox1/ncor2/pbxip1a/bhlhe41/si:ch211-132b12.7/noc2l/supt5h/nfixb/pphln1/bahcc1b/relb/rrp8/mkxa/cry2
GO:1902679	negative regulation of RNA biosynthetic process	34	0.00342044	0.0667249	0.0610417	cry1aa/cipca/cipcb/id2a/rxrba/smad2/id2b/rnf2/nkap/hes6/ncor1/hdac3/junba/hic1/sars/cnot1/smyd2a/pbxip1b/nfia/cica/riox1/ncor2/pbxip1a/bhlhe41/si:ch211-132b12.7/noc2l/supt5h/nfixb/pphln1/bahcc1b/relb/rrp8/mkxa/cry2
GO:1903507	negative regulation of nucleic acid-templated transcription	34	0.00342044	0.0667249	0.0610417	cry1aa/cipca/cipcb/id2a/rxrba/smad2/id2b/rnf2/nkap/hes6/ncor1/hdac3/junba/hic1/sars/cnot1/smyd2a/pbxip1b/nfia/cica/riox1/ncor2/pbxip1a/bhlhe41/si:ch211-132b12.7/noc2l/supt5h/nfixb/pphln1/bahcc1b/relb/rrp8/mkxa/cry2
GO:0044272	sulfur compound biosynthetic process	11	0.00374573	0.0725127	0.0663366	cbsb/elovl4b/pdha1a/enoph1/aclya/tpk1/csad/acss1/mat2al/mat2ab/amd1
GO:0045934	negative regulation of nucleobase-containing compound metabolic process	38	0.00386082	0.073858	0.0675672	cry1aa/cipca/cipcb/msh6/id2a/rxrba/smad2/id2b/rbmx/rnf2/nkap/hes6/ncor1/hdac3/junba/hic1/sars/cnot1/smyd2a/pbxip1b/nfia/cica/riox1/ncor2/hrh3/pbxip1a/bhlhe41/si:ch211-132b12.7/noc2l/supt5h/nfixb/pphln1/bahcc1b/relb/rrp8/igfbp2b/mkxa/cry2
GO:0090150	establishment of protein localization to membrane	12	0.00387347	0.073858	0.0675672	rilpl2/slc9a3r1a/agk/ssr1/srp54/golph3/exoc4/mief1/cnsta/sec61b/get4/ssr2
GO:0043436	oxoacid metabolic process	61	0.00407064	0.0770385	0.0704768	ehhadh/gls2a/sgpl1/mlycd/npl/aldh1l1/aldh1a2/cbsb/ldha/ldhba/azin1b/ctps1a/apoa4b.1/arg2/pgam1a/sephs1/mdh1ab/elovl4b/hagh/rars/mars/yars/cars/si:ch73-314g15.3/glud1b/rdh10b/cyp2k22/kyat3/cyp2k18/aldh4a1/hibadhb/asns/qars/si:ch73-71d17.1/acot16/mdh2/ddc/pdha1a/fpgs/enoph1/aclya/sars/hars/csad/me3/acss1/pfklb/afmid/acot11a/gls2b/acot18/tat/zgc:172341/nars/apoa4b.2/si:dkey-7f3.14/acot17/slc7a7/mgst…
GO:0031102	neuron projection regeneration	10	0.00418856	0.0786829	0.0719812	apoeb/apoa4b.1/cnp/mvp/lgmn/apoea/apoa4b.2/si:dkey-7f3.14/epha4a/rtn4b
GO:0015711	organic anion transport	24	0.00431331	0.0804306	0.0735801	slc7a8a/slco2a1/atp8a2/apoeb/apoa4b.1/abcc5/slc16a1b/atp11c/slc43a2a/pla2g12a/pitpnbl/slc38a7/slc51a/apoea/slc23a1/slc26a3.1/slc38a2/slc16a4/apoa4b.2/si:dkey-7f3.14/atp10d/slc16a7/slco2b1/slc16a9a
GO:0005976	polysaccharide metabolic process	9	0.00458289	0.082841	0.0757851	chs1/ppp1r3cb/phkg2/pygb/glt8d1/phkg1b/ugp2a/phka2/phkg1a
GO:0050684	regulation of mRNA processing	9	0.00458289	0.082841	0.0757851	magoh/dhx37/rbm10/rbmx/rbm25b/smu1a/eif4a3/rbfox1l/rbm8a
GO:0019218	regulation of steroid metabolic process	5	0.00460591	0.082841	0.0757851	apoeb/apoa4b.1/apoea/apoa4b.2/si:dkey-7f3.14
GO:0032968	positive regulation of transcription elongation from RNA polymerase II promoter	5	0.00460591	0.082841	0.0757851	cdc73/leo1/gtf2f2a/supt16h/supt5h
GO:0071428	rRNA-containing ribonucleoprotein complex export from nucleus	5	0.00460591	0.082841	0.0757851	rrs1/eif6/abce1/ltv1/nmd3
GO:0051253	negative regulation of RNA metabolic process	35	0.00465639	0.0831592	0.0760763	cry1aa/cipca/cipcb/id2a/rxrba/smad2/id2b/rbmx/rnf2/nkap/hes6/ncor1/hdac3/junba/hic1/sars/cnot1/smyd2a/pbxip1b/nfia/cica/riox1/ncor2/pbxip1a/bhlhe41/si:ch211-132b12.7/noc2l/supt5h/nfixb/pphln1/bahcc1b/relb/rrp8/mkxa/cry2
GO:0006082	organic acid metabolic process	61	0.00490986	0.0870728	0.0796565	ehhadh/gls2a/sgpl1/mlycd/npl/aldh1l1/aldh1a2/cbsb/ldha/ldhba/azin1b/ctps1a/apoa4b.1/arg2/pgam1a/sephs1/mdh1ab/elovl4b/hagh/rars/mars/yars/cars/si:ch73-314g15.3/glud1b/rdh10b/cyp2k22/kyat3/cyp2k18/aldh4a1/hibadhb/asns/qars/si:ch73-71d17.1/acot16/mdh2/ddc/pdha1a/fpgs/enoph1/aclya/sars/hars/csad/me3/acss1/pfklb/afmid/acot11a/gls2b/acot18/tat/zgc:172341/nars/apoa4b.2/si:dkey-7f3.14/acot17/slc7a7/mgst…
GO:0006412	translation	63	0.00504881	0.0889151	0.0813419	rps23/nhp2/mettl3/magoh/mrpl36/ago4/rpl24/ncbp2/etf1b/ddx3b/rpl7l1/eif5/eif1axb/eif2s2/qrsl1/brf1a/rpl7/rars/rps15/mars/yars/cars/eif4a1a/eif6/zgc:56676/cdc123/eif4e2rs1/cpeb4a/eif4a3/qars/eif4h/casc3/abce1/eif5a2/eif3jb/eif2b1/rpl11/rwdd1/eef2k/sars/hars/cnot1/eif4ebp3/ftsj1/rbm8a/tufm/mrps18b/eif4e1c/faub/mrpl34/mrps17/trnau1apa/mrpl4/eef1db/trim71/dph2/eif3hb/nars/usp16/eefsec/mrps2/eif4ea/eif…
GO:0031328	positive regulation of cellular biosynthetic process	46	0.0054085	0.0945928	0.086536	mettl3/si:ch211-153b23.7/tcf20/maml3/elf1/egr1/tefa/prox1a/nr5a2/ccnt2b/psmc6/rbmx/ddx5/apoa4b.1/cnbpa/heatr1/nfe2l2a/stat4/stat5a/chuk/maff/cdc73/dnajc2/leo1/eif5a2/creb3l3l/junba/gtf2f2a/pxylp1/hif1al2/erlin1/cnep1r1/creb3l3a/nfia/si:dkey-156n14.5/tp53bp1/mysm1/supt16h/usp16/apoa4b.2/si:dkey-7f3.14/runx3/supt5h/nfixb/foxn3/relb
GO:0043414	macromolecule methylation	19	0.0056449	0.0980511	0.0896998	mettl3/ctr9/nop2/ftsj3/prmt1/setd6/nsun2/prmt5/ntmt1/fbl/carm1/ftsj1/smyd2a/trmt112/tfb2m/wdr4/ezh1/emg1/tfb1m
GO:0000027	ribosomal large subunit assembly	6	0.00586562	0.0998336	0.0913304	rpl24/bxdc2/rpl11/rpf1/mrto4/nle1
GO:0006695	cholesterol biosynthetic process	6	0.00586562	0.0998336	0.0913304	pmvk/apoeb/apoa4b.1/apoea/apoa4b.2/si:dkey-7f3.14
GO:1902653	secondary alcohol biosynthetic process	6	0.00586562	0.0998336	0.0913304	pmvk/apoeb/apoa4b.1/apoea/apoa4b.2/si:dkey-7f3.14
GO:0051028	mRNA transport	10	0.00596215	0.1008	0.0922146	magoh/ncbp2/ddx39aa/eif4a3/casc3/ddx39ab/nupl2/thoc3/rbm8a/rbmx2
GO:0043043	peptide biosynthetic process	63	0.00603456	0.101349	0.0927163	rps23/nhp2/mettl3/magoh/mrpl36/ago4/rpl24/ncbp2/etf1b/ddx3b/rpl7l1/eif5/eif1axb/eif2s2/qrsl1/brf1a/rpl7/rars/rps15/mars/yars/cars/eif4a1a/eif6/zgc:56676/cdc123/eif4e2rs1/cpeb4a/eif4a3/qars/eif4h/casc3/abce1/eif5a2/eif3jb/eif2b1/rpl11/rwdd1/eef2k/sars/hars/cnot1/eif4ebp3/ftsj1/rbm8a/tufm/mrps18b/eif4e1c/faub/mrpl34/mrps17/trnau1apa/mrpl4/eef1db/trim71/dph2/eif3hb/nars/usp16/eefsec/mrps2/eif4ea/eif…
GO:0006576	cellular biogenic amine metabolic process	7	0.00619838	0.103415	0.0946068	oaz2a/oaz1a/azin1b/srm/afmid/sat1b/amd1
GO:0006188	IMP biosynthetic process	5	0.00662468	0.10439	0.0954989	ampd2a/ampd3b/adsl/hprt1/ppat
GO:0019827	stem cell population maintenance	5	0.00662468	0.10439	0.0954989	mettl3/cdh2/med14/notch3/notch1b
GO:0032371	regulation of sterol transport	5	0.00662468	0.10439	0.0954989	apoeb/apoa4b.1/apoea/apoa4b.2/si:dkey-7f3.14
GO:0032374	regulation of cholesterol transport	5	0.00662468	0.10439	0.0954989	apoeb/apoa4b.1/apoea/apoa4b.2/si:dkey-7f3.14
GO:0042632	cholesterol homeostasis	5	0.00662468	0.10439	0.0954989	apoeb/apoa4b.1/apoea/apoa4b.2/si:dkey-7f3.14
GO:0055092	sterol homeostasis	5	0.00662468	0.10439	0.0954989	apoeb/apoa4b.1/apoea/apoa4b.2/si:dkey-7f3.14
GO:0097194	execution phase of apoptosis	5	0.00662468	0.10439	0.0954989	endog/madd/stk24b/dffa/stk24a
GO:0006637	acyl-CoA metabolic process	9	0.00670962	0.10439	0.0954989	pmvk/elovl4b/acot16/pdha1a/aclya/acss1/acot11a/acot18/acot17
GO:0008203	cholesterol metabolic process	9	0.00670962	0.10439	0.0954989	pmvk/npc2/apoeb/apoa4b.1/erlin1/apoea/lipea/apoa4b.2/si:dkey-7f3.14
GO:0035383	thioester metabolic process	9	0.00670962	0.10439	0.0954989	pmvk/elovl4b/acot16/pdha1a/aclya/acss1/acot11a/acot18/acot17
GO:1902652	secondary alcohol metabolic process	9	0.00670962	0.10439	0.0954989	pmvk/npc2/apoeb/apoa4b.1/erlin1/apoea/lipea/apoa4b.2/si:dkey-7f3.14
GO:0007422	peripheral nervous system development	12	0.00700983	0.108396	0.0991635	ssbp3a/aldh1a2/hdac1/cdh2/kif1b/rtn4a/adcy6b/agrn/notch3/cdk5/rtn4b/notch1b
GO:1901657	glycosyl compound metabolic process	16	0.00718624	0.11045	0.101043	zgc:174895/tymp/prps1a/impdh2/ctps1a/adkb/uck2b/impdh1b/aprt/qtrt2/hprt1/upp1/si:ch211-201h21.5/ppat/pnp5a/amd1
GO:0016358	dendrite development	8	0.00737982	0.112742	0.10314	llph/sdc2/ntn1a/kctd12.1/rtn4ip1/rbpms2a/srgap2/sipa1l1
GO:0045944	positive regulation of transcription by RNA polymerase II	29	0.00770636	0.114586	0.104827	si:ch211-153b23.7/tcf20/maml3/elf1/egr1/prox1a/nr5a2/ccnt2b/psmc6/rbmx/cnbpa/stat4/stat5a/chuk/cdc73/leo1/creb3l3l/junba/gtf2f2a/hif1al2/erlin1/creb3l3a/nfia/tp53bp1/mysm1/supt16h/supt5h/nfixb/relb
GO:0048934	peripheral nervous system neuron differentiation	6	0.00773357	0.114586	0.104827	ssbp3a/hdac1/rtn4a/notch3/cdk5/notch1b
GO:0048935	peripheral nervous system neuron development	6	0.00773357	0.114586	0.104827	ssbp3a/hdac1/rtn4a/notch3/cdk5/notch1b
GO:0005977	glycogen metabolic process	7	0.00781682	0.114586	0.104827	ppp1r3cb/phkg2/pygb/phkg1b/ugp2a/phka2/phkg1a
GO:0006073	cellular glucan metabolic process	7	0.00781682	0.114586	0.104827	ppp1r3cb/phkg2/pygb/phkg1b/ugp2a/phka2/phkg1a
GO:0044042	glucan metabolic process	7	0.00781682	0.114586	0.104827	ppp1r3cb/phkg2/pygb/phkg1b/ugp2a/phka2/phkg1a
GO:0055088	lipid homeostasis	7	0.00781682	0.114586	0.104827	pnpla2/apoeb/apoa4b.1/pnpla3/apoea/apoa4b.2/si:dkey-7f3.14
GO:0070647	protein modification by small protein conjugation or removal	50	0.00811741	0.118309	0.108232	ube2g1b/ddb2/rnf139/ube4b/dcun1d2a/ufm1/asb12a/wsb1/ube2d1b/ndfip1/usp24/rnf2/dcun1d1/ube2g1a/eif4a1a/dcaf13/uvssa/klhl21/uchl5/sumo3a/sumo1/abraxas2b/fbxw5/ube2v2/kctd6b/otub1a/ctu2/crbn/rnf24/spopla/uchl3/spoplb/usp12b/lonrf1/mysm1/trim71/socs2/rnf213b/usp38/usp2b/senp3b/ube2s/ankib1a/si:ch211-284e13.9/usp16/senp5/socs5a/usp37/gps1/ube2a
GO:0048589	developmental growth	39	0.00860213	0.124657	0.11404	llph/dia1b/npr2/aldh1a2/gpc4/appb/hdac1/diexf/ntn1a/cx43/cdh2/apoeb/stat3/ruvbl1/scfd1/rap1b/rbbp4/cyfip1/nrp1a/kif1b/hspa9/tnfrsf1a/lgmn/mtrex/rap1aa/cnot1/apoea/katna1/sec14l8/plxnb1a/sema5a/chd3/plxnb1b/creb1a/epha4a/mgat5/clstn1/notch1b/igfbp2b
GO:0006820	anion transport	34	0.0086596	0.124777	0.114149	slc4a5/slc7a8a/slco2a1/atp8a2/apoeb/apoa4b.1/clca1/abcc5/clic4/slc16a1b/atp11c/slc13a1/zgc:56235/slc43a2a/pla2g12a/clic5b/slc13a2/pitpnbl/slc38a7/slc51a/apoea/slc20a2/slc23a1/slc4a4b/slc26a3.1/slc38a2/slc16a4/apoa4b.2/si:dkey-7f3.14/atp10d/slc34a2a/slc16a7/slco2b1/slc16a9a
GO:0043161	proteasome-mediated ubiquitin-dependent protein catabolic process	27	0.00889403	0.127055	0.116233	march6/rnf139/ube4b/psmb5/psmc6/plaa/fbxw11a/psmd6/cdc34a/trib3/fbxw5/psmd8/crbn/rnf24/nsfl1c/spopla/erlin1/psmd4b/ankzf1/spoplb/lonrf1/rlim/ube2s/ankib1a/si:ch211-284e13.9/foxred2/ube2a
GO:0030301	cholesterol transport	8	0.008968	0.127055	0.116233	abca5/npc2/apoeb/apoa4b.1/apoea/abcg2c/apoa4b.2/si:dkey-7f3.14
GO:0044264	cellular polysaccharide metabolic process	8	0.008968	0.127055	0.116233	chs1/ppp1r3cb/phkg2/pygb/phkg1b/ugp2a/phka2/phkg1a
GO:0032786	positive regulation of DNA-templated transcription, elongation	5	0.00919002	0.128054	0.117148	cdc73/leo1/gtf2f2a/supt16h/supt5h
GO:0046686	response to cadmium ion	5	0.00919002	0.128054	0.117148	mt2/cygb1/tap2a/sumo1/hsp70l
GO:0050994	regulation of lipid catabolic process	5	0.00919002	0.128054	0.117148	pnpla2/apoa4b.1/pnpla3/apoa4b.2/si:dkey-7f3.14
GO:0009309	amine biosynthetic process	4	0.0097264	0.131203	0.120028	oaz1a/azin1b/srm/amd1
GO:0021555	midbrain-hindbrain boundary morphogenesis	4	0.0097264	0.131203	0.120028	calm1a/slc7a6os/myh10/myh9b
GO:0032388	positive regulation of intracellular transport	4	0.0097264	0.131203	0.120028	ncbp2/oaz1a/cpsf6/mief1
GO:0042401	cellular biogenic amine biosynthetic process	4	0.0097264	0.131203	0.120028	oaz1a/azin1b/srm/amd1
GO:0045292	mRNA cis splicing, via spliceosome	4	0.0097264	0.131203	0.120028	ncbp2/phf5a/rbm22/sart1
GO:0051181	cofactor transport	4	0.0097264	0.131203	0.120028	hpx/abcc5/slc48a1a/slc23a1
GO:0000271	polysaccharide biosynthetic process	6	0.00999429	0.133397	0.122036	chs1/ppp1r3cb/phkg2/glt8d1/phkg1b/phkg1a
GO:0033344	cholesterol efflux	6	0.00999429	0.133397	0.122036	apoeb/apoa4b.1/apoea/abcg2c/apoa4b.2/si:dkey-7f3.14
GO:0009896	positive regulation of catabolic process	14	0.010405	0.138152	0.126385	mettl3/pnpla2/oaz1a/apoa4b.1/trib3/pnpla3/cnot1/lonrf1/lrsam1/ankib1a/si:ch211-284e13.9/apoa4b.2/si:dkey-7f3.14/supv3l1
GO:0008033	tRNA processing	15	0.0107419	0.141151	0.129128	nsun2/nat10/qtrt2/fbl/ctu2/ftsj1/elac2/pus1/pop5/trmt13/trit1/pop4/trmt112/elp2/wdr4
GO:0009112	nucleobase metabolic process	8	0.0107978	0.141151	0.129128	zgc:174895/uck2b/aprt/zgc:103559/gda/xdh/aox6/ppat
GO:0015918	sterol transport	8	0.0107978	0.141151	0.129128	abca5/npc2/apoeb/apoa4b.1/apoea/abcg2c/apoa4b.2/si:dkey-7f3.14
GO:0051276	chromosome organization	60	0.0109201	0.142017	0.129921	ctr9/hdac1/actl6a/msh6/smarca5/ruvbl1/h1f0/setb/rbbp4/prmt1/anp32b/h1fx/seta/rnf2/smarca2/xrcc6/zgc:173742/nap1l4a/chd1l/cdc73/prdm9/hdac3/smarcc1a/dnajc2/leo1/fbl/aebp2/nup133/kdm5bb/ing2/naa50/carm1/dscc1/kat5b/smyd2a/psme4b/top1l/tbl1xr1a/hp1bp3/tprb/smarca1/riox1/mysm1/suz12b/supt16h/sin3aa/pds5b/ep300b/crebbpa/crebbpb/chd3/usp16/supv3l1/noc2l/ezh1/dek/ino80b/bahcc1b/rrp8/ube2a
GO:0010557	positive regulation of macromolecule biosynthetic process	42	0.0113068	0.146296	0.133836	mettl3/si:ch211-153b23.7/tcf20/maml3/elf1/egr1/tefa/prox1a/nr5a2/ccnt2b/psmc6/rbmx/ddx5/cnbpa/heatr1/nfe2l2a/stat4/stat5a/chuk/maff/cdc73/dnajc2/leo1/eif5a2/creb3l3l/junba/gtf2f2a/pxylp1/hif1al2/erlin1/creb3l3a/nfia/si:dkey-156n14.5/tp53bp1/mysm1/supt16h/usp16/runx3/supt5h/nfixb/foxn3/relb
GO:0048705	skeletal system morphogenesis	26	0.0114137	0.146929	0.134415	aldh1l1/aldh1a2/cx43/cdh2/egr1/wdr43/scfd1/rap1b/cnbpa/rnf2/polr1a/med14/dcaf7/ptpn11b/ilvbl/leo1/rap1aa/polr1d/fscn1a/nolc1/caspa/runx3/disp1/rtn4b/ece1/mkxa
GO:0010035	response to inorganic substance	12	0.0118662	0.150728	0.13789	cry1aa/mt2/per2/cygb1/tap2a/slc30a1a/sumo1/hvcn1/park7/hsp70l/per1a/aco1
GO:0045893	positive regulation of transcription, DNA-templated	39	0.0119465	0.150728	0.13789	si:ch211-153b23.7/tcf20/maml3/elf1/egr1/tefa/prox1a/nr5a2/ccnt2b/psmc6/rbmx/ddx5/cnbpa/heatr1/nfe2l2a/stat4/stat5a/chuk/maff/cdc73/dnajc2/leo1/creb3l3l/junba/gtf2f2a/hif1al2/erlin1/creb3l3a/nfia/si:dkey-156n14.5/tp53bp1/mysm1/supt16h/usp16/runx3/supt5h/nfixb/foxn3/relb
GO:1902680	positive regulation of RNA biosynthetic process	39	0.0119465	0.150728	0.13789	si:ch211-153b23.7/tcf20/maml3/elf1/egr1/tefa/prox1a/nr5a2/ccnt2b/psmc6/rbmx/ddx5/cnbpa/heatr1/nfe2l2a/stat4/stat5a/chuk/maff/cdc73/dnajc2/leo1/creb3l3l/junba/gtf2f2a/hif1al2/erlin1/creb3l3a/nfia/si:dkey-156n14.5/tp53bp1/mysm1/supt16h/usp16/runx3/supt5h/nfixb/foxn3/relb
GO:1903508	positive regulation of nucleic acid-templated transcription	39	0.0119465	0.150728	0.13789	si:ch211-153b23.7/tcf20/maml3/elf1/egr1/tefa/prox1a/nr5a2/ccnt2b/psmc6/rbmx/ddx5/cnbpa/heatr1/nfe2l2a/stat4/stat5a/chuk/maff/cdc73/dnajc2/leo1/creb3l3l/junba/gtf2f2a/hif1al2/erlin1/creb3l3a/nfia/si:dkey-156n14.5/tp53bp1/mysm1/supt16h/usp16/runx3/supt5h/nfixb/foxn3/relb
GO:0006869	lipid transport	22	0.0121258	0.152233	0.139266	apoda.2/abca5/osbpl10b/atp8a2/npc2/apoeb/apoa4b.1/osbpl2b/atp11c/pla2g12a/pitpnbl/slc51a/apoea/abca3b/myo5b/abcg2c/apoa4b.2/si:dkey-7f3.14/atp10d/vtg5/cptp/si:ch73-233k15.2
GO:0034629	cellular protein-containing complex localization	5	0.0123652	0.152967	0.139938	klhl21/nup133/exoc3l4/exoc3l2b/tnfaip2a
GO:0043248	proteasome assembly	5	0.0123652	0.152967	0.139938	psmd11b/psmd8/psmd11a/psmd4b/elp2
GO:0098727	maintenance of cell number	5	0.0123652	0.152967	0.139938	mettl3/cdh2/med14/notch3/notch1b
GO:0060284	regulation of cell development	32	0.0128903	0.158688	0.145172	llph/appb/hdac1/id2a/ntn1a/cdh2/apoeb/smad2/stat3/gnl3/adgrg1/nrp1a/prmt5/mdga2a/kctd12.1/rtn4ip1/eftud2/ndel1a/rbpms2a/tm4sf4/carm1/smyd2a/apoea/srgap2/si:ch211-194k22.8/plxnb1a/sipa1l1/plxnb1b/notch3/epha4a/clstn1/gnl2
GO:0042594	response to starvation	9	0.0131394	0.160974	0.147263	map1lc3b/bcas3/cpeb4a/nuak2/depdc5/rragca/gip/rrp8/nupr1b
GO:0045935	positive regulation of nucleobase-containing compound metabolic process	44	0.0136613	0.166562	0.152376	mettl3/si:ch211-153b23.7/tcf20/dhx37/maml3/elf1/egr1/tefa/prox1a/nr5a2/ccnt2b/psmc6/rbmx/ddx5/cnbpa/heatr1/nfe2l2a/stat4/stat5a/chuk/maff/cdc73/dnajc2/leo1/rbm22/creb3l3l/junba/gtf2f2a/cnot1/hif1al2/erlin1/creb3l3a/nfia/si:dkey-156n14.5/tp53bp1/mysm1/supt16h/usp16/supv3l1/runx3/supt5h/nfixb/foxn3/relb
GO:0005978	glycogen biosynthetic process	4	0.0141785	0.170411	0.155896	ppp1r3cb/phkg2/phkg1b/phkg1a
GO:0009250	glucan biosynthetic process	4	0.0141785	0.170411	0.155896	ppp1r3cb/phkg2/phkg1b/phkg1a
GO:0016556	mRNA modification	4	0.0141785	0.170411	0.155896	mettl3/pus1/a1cf/dkc1
GO:0006612	protein targeting to membrane	7	0.0145306	0.173818	0.159014	slc9a3r1a/ssr1/srp54/exoc4/mief1/sec61b/ssr2
GO:1904888	cranial skeletal system development	28	0.0146474	0.174393	0.159539	aldh1l1/aldh1a2/egr1/wdr43/scfd1/usp24/cnbpa/rnf2/polr1a/med14/dcaf7/ptpn11b/ilvbl/leo1/uchl5/polr1d/uchl3/fscn1a/tapt1b/nolc1/mysm1/caspa/runx3/disp1/rtn4b/usp37/ece1/mkxa
GO:0097164	ammonium ion metabolic process	10	0.0148835	0.176376	0.161354	chdh/ache/azin1b/apoa4b.1/srm/pnpla6/sat1b/apoa4b.2/si:dkey-7f3.14/amd1
GO:0048762	mesenchymal cell differentiation	20	0.0149939	0.176858	0.161794	ctr9/aldh1l1/cdh2/pparda/stat3/cnbpa/polr1a/parp3/med14/nrp1a/leo1/rcc2/glrx2/plod3/fscn1a/tapt1b/mych/med13b/mcrip1/foxc1b
GO:0048511	rhythmic process	12	0.015102	0.177309	0.162207	cry1aa/cipca/cipcb/per2/impdh2/mybbp1a/per1b/nfil3-6/nr1d1/lgr4/ciarta/si:ch211-132b12.7
GO:0042455	ribonucleoside biosynthetic process	9	0.0152902	0.178691	0.163471	impdh2/ctps1a/adkb/uck2b/impdh1b/qtrt2/hprt1/upp1/amd1
GO:0031331	positive regulation of cellular catabolic process	13	0.0156735	0.181498	0.166039	mettl3/pnpla2/apoa4b.1/trib3/pnpla3/cnot1/lonrf1/lrsam1/ankib1a/si:ch211-284e13.9/apoa4b.2/si:dkey-7f3.14/supv3l1
GO:1990138	neuron projection extension	13	0.0156735	0.181498	0.166039	llph/appb/ntn1a/apoeb/cyfip1/nrp1a/kif1b/apoea/katna1/plxnb1a/sema5a/plxnb1b/epha4a
GO:0000387	spliceosomal snRNP assembly	6	0.0158513	0.181896	0.166403	gemin8/snrpd1/prpf31/rbm22/sart1/ddx20
GO:0098876	vesicle-mediated transport to the plasma membrane	6	0.0158513	0.181896	0.166403	ankrd50l/golph3/exoc4/snx17/cnsta/clstn1
GO:0008202	steroid metabolic process	14	0.0159955	0.182681	0.167121	pmvk/npc2/apoeb/apoa4b.1/hsd3b7/sult1st3/hsd17b3/dhcr24/erlin1/apoea/lipea/apoa4b.2/si:dkey-7f3.14/ebpl
GO:0006515	protein quality control for misfolded or incompletely synthesized proteins	5	0.0162079	0.182681	0.167121	sdf2/ankzf1/ngly1/lonp1/yme1l1a
GO:0032368	regulation of lipid transport	5	0.0162079	0.182681	0.167121	apoeb/apoa4b.1/apoea/apoa4b.2/si:dkey-7f3.14
GO:1905952	regulation of lipid localization	5	0.0162079	0.182681	0.167121	apoeb/apoa4b.1/apoea/apoa4b.2/si:dkey-7f3.14
GO:0006520	cellular amino acid metabolic process	27	0.0163422	0.183379	0.16776	gls2a/cbsb/azin1b/ctps1a/arg2/sephs1/rars/mars/yars/cars/glud1b/kyat3/aldh4a1/hibadhb/asns/qars/si:ch73-71d17.1/ddc/enoph1/sars/hars/afmid/gls2b/tat/zgc:172341/nars/slc7a7
GO:0031175	neuron projection development	57	0.0164668	0.183964	0.168295	llph/ssbp3a/appb/sdc2/lamc1/ntn1a/cdh2/apoeb/anos1a/stat3/apoa4b.1/cnp/optn/cyfip1/nrp1a/mycbp2/kif1b/mvp/kctd12.1/rtn4ip1/tor1l3/ndel1a/uba1/lgmn/stk24b/rbpms2a/rab10/rtn4a/cobl/elp3/apoea/katna1/stk24a/plod3/srgap2/tnikb/gba2/pnpla6/plxnb1a/sema5a/sipa1l1/tor1/agrn/myo5b/mfn2/plxnb1b/apoa4b.2/si:dkey-7f3.14/notch3/disp1/epha4a/cdk5/rtn4b/clstn1/fryb/notch1b/ptprfb
GO:0006400	tRNA modification	10	0.0170231	0.189345	0.173218	nsun2/nat10/qtrt2/ctu2/ftsj1/pus1/trit1/trmt112/elp2/wdr4
GO:0010628	positive regulation of gene expression	44	0.0172859	0.191428	0.175124	mettl3/si:ch211-153b23.7/tcf20/dhx37/maml3/elf1/egr1/tefa/prox1a/nr5a2/ccnt2b/psmc6/rbmx/ddx5/cnbpa/heatr1/nfe2l2a/stat4/stat5a/chuk/maff/cdc73/dnajc2/leo1/rbm22/eif5a2/creb3l3l/junba/gtf2f2a/hif1al2/erlin1/creb3l3a/nfia/si:dkey-156n14.5/tp53bp1/mysm1/supt16h/ubap2a/usp16/runx3/supt5h/nfixb/foxn3/relb
GO:0060560	developmental growth involved in morphogenesis	20	0.0175412	0.19341	0.176937	llph/gpc4/appb/hdac1/ntn1a/cdh2/apoeb/stat3/cyfip1/nrp1a/kif1b/apoea/katna1/sec14l8/plxnb1a/sema5a/plxnb1b/creb1a/epha4a/clstn1
GO:0009163	nucleoside biosynthetic process	9	0.0176888	0.194194	0.177654	impdh2/ctps1a/adkb/uck2b/impdh1b/qtrt2/hprt1/upp1/amd1
GO:0009266	response to temperature stimulus	8	0.017937	0.19607	0.17937	per2/dnaja3a/per1b/sumo1/hsp70l/bhlhe41/nupr1b/cry2
GO:0010876	lipid localization	22	0.018947	0.206221	0.188657	apoda.2/abca5/osbpl10b/atp8a2/npc2/apoeb/apoa4b.1/osbpl2b/atp11c/pla2g12a/pitpnbl/slc51a/apoea/abca3b/myo5b/abcg2c/apoa4b.2/si:dkey-7f3.14/atp10d/vtg5/cptp/si:ch73-233k15.2
GO:0002064	epithelial cell development	14	0.0195351	0.20853	0.190768	rilpl2/kdf1b/aldh1a2/cdh2/glcci1a/ilk/dhps/tm4sf4/cobl/tnfrsf19/adgra2/ide/iqgap2/gck
GO:0006613	cotranslational protein targeting to membrane	4	0.0197347	0.20853	0.190768	ssr1/srp54/sec61b/ssr2
GO:0006805	xenobiotic metabolic process	4	0.0197347	0.20853	0.190768	sult1st1/sult1st3/csad/sult1st5
GO:0010821	regulation of mitochondrion organization	4	0.0197347	0.20853	0.190768	pink1/lonp1/mief1/apopt1
GO:0046470	phosphatidylcholine metabolic process	4	0.0197347	0.20853	0.190768	apoa4b.1/pnpla6/apoa4b.2/si:dkey-7f3.14
GO:0048885	neuromast deposition	4	0.0197347	0.20853	0.190768	aldh1l1/prox1a/rtn4a/tnfrsf19
GO:0050773	regulation of dendrite development	4	0.0197347	0.20853	0.190768	llph/kctd12.1/rtn4ip1/sipa1l1
GO:0014033	neural crest cell differentiation	17	0.020624	0.215524	0.197167	ctr9/aldh1l1/cdh2/pparda/cnbpa/polr1a/med14/nrp1a/leo1/rcc2/glrx2/plod3/fscn1a/tapt1b/mych/med13b/foxc1b
GO:0033692	cellular polysaccharide biosynthetic process	5	0.0207689	0.215524	0.197167	chs1/ppp1r3cb/phkg2/phkg1b/phkg1a
GO:0043173	nucleotide salvage	5	0.0207689	0.215524	0.197167	ampd2a/uck2b/ampd3b/hprt1/upp1
GO:1901071	glucosamine-containing compound metabolic process	5	0.0207689	0.215524	0.197167	chs1/chia.1/chia.2/chia.3/gnpda1
GO:0006112	energy reserve metabolic process	7	0.0208215	0.215524	0.197167	ppp1r3cb/phkg2/pygb/phkg1b/ugp2a/phka2/phkg1a
GO:1901615	organic hydroxy compound metabolic process	21	0.0211571	0.217654	0.199116	pmvk/aldh1a2/npc2/apoeb/apoa4b.1/sult1st1/hagh/sult1st3/rdh10b/hsd17b3/nudt3a/dhrs3b/erlin1/apoea/ppip5k1b/comta/lipea/apoa4b.2/si:dkey-7f3.14/miox/ebpl
GO:0043009	chordate embryonic development	58	0.021199	0.217654	0.199116	pcsk7/ctr9/aldh1l1/aldh1a2/rpl24/hdac1/foxa2/ntn1a/cx43/cdh2/egr1/rarga/wdr43/scfd1/rap1b/slc41a1/cnbpa/rnf2/polr1a/parp3/cul2/med14/rps15/dcaf7/hes6/chuk/ptpn11b/ilvbl/bcor/igfbp3/leo1/sumo3a/sumo1/rbm22/calm1a/rpl11/naa50/polr1d/slc7a6os/myh10/fscn1a/mbnl2/nolc1/myh9b/trim71/atp13a2/creb1a/caspa/notch3/runx3/disp1/atp1a1a.1/rtn4b/ndufaf7/ece1/hip1/ghrl/mkxa
GO:0016125	sterol metabolic process	10	0.0219707	0.224668	0.205533	pmvk/npc2/apoeb/apoa4b.1/erlin1/apoea/lipea/apoa4b.2/si:dkey-7f3.14/ebpl
GO:0048704	embryonic skeletal system morphogenesis	23	0.0223175	0.227298	0.207938	aldh1l1/aldh1a2/cx43/egr1/wdr43/scfd1/cnbpa/rnf2/polr1a/med14/dcaf7/ptpn11b/ilvbl/leo1/polr1d/fscn1a/nolc1/caspa/runx3/disp1/rtn4b/ece1/mkxa
GO:0009792	embryo development ending in birth or egg hatching	58	0.0228363	0.231652	0.211921	pcsk7/ctr9/aldh1l1/aldh1a2/rpl24/hdac1/foxa2/ntn1a/cx43/cdh2/egr1/rarga/wdr43/scfd1/rap1b/slc41a1/cnbpa/rnf2/polr1a/parp3/cul2/med14/rps15/dcaf7/hes6/chuk/ptpn11b/ilvbl/bcor/igfbp3/leo1/sumo3a/sumo1/rbm22/calm1a/rpl11/naa50/polr1d/slc7a6os/myh10/fscn1a/mbnl2/nolc1/myh9b/trim71/atp13a2/creb1a/caspa/notch3/runx3/disp1/atp1a1a.1/rtn4b/ndufaf7/ece1/hip1/ghrl/mkxa
GO:1901659	glycosyl compound biosynthetic process	9	0.0232881	0.235293	0.215252	impdh2/ctps1a/adkb/uck2b/impdh1b/qtrt2/hprt1/upp1/amd1
GO:1903311	regulation of mRNA metabolic process	12	0.0235227	0.235974	0.215875	mettl3/magoh/dhx37/rbm10/rbmx/rbm25b/smu1a/eif4a3/rbfox1l/cnot1/rbm8a/csdc2b
GO:0018205	peptidyl-lysine modification	18	0.023563	0.235974	0.215875	ctr9/ruvbl1/setd6/eif4a1a/dhps/sumo3a/sumo1/naa50/kat5b/pop5/smyd2a/senp3b/ep300b/crebbpa/crebbpb/senp5/noc2l/ezh1
GO:0043401	steroid hormone mediated signaling pathway	14	0.0236362	0.235974	0.215875	esr1/nr2f5/rxrba/rarga/thrb/nr5a2/pparda/med14/carm1/cnot1/nr1d1/rxraa/nr1h5/nr1i2
GO:0072523	purine-containing compound catabolic process	6	0.0237277	0.235974	0.215875	nudt3a/zgc:103559/gda/si:ch211-201h21.5/xdh/aox6
GO:0048709	oligodendrocyte differentiation	8	0.0242623	0.240349	0.219877	aldh1a2/hdac1/foxa2/pes/adgrg1/cdc73/leo1/notch3
GO:0006368	transcription elongation from RNA polymerase II promoter	7	0.0245852	0.2426	0.221936	cdc73/leo1/gtf2f2a/polr2i/elp2/supt16h/supt5h
GO:0048545	response to steroid hormone	15	0.0255011	0.249694	0.228427	esr1/nr2f5/rxrba/rarga/thrb/nr5a2/pparda/med14/cyp2k22/carm1/cnot1/nr1d1/rxraa/nr1h5/nr1i2
GO:0070646	protein modification by small protein removal	15	0.0255011	0.249694	0.228427	usp24/eif4a1a/uchl5/abraxas2b/otub1a/uchl3/usp12b/mysm1/usp38/usp2b/senp3b/usp16/senp5/usp37/gps1
GO:0048588	developmental cell growth	14	0.0259124	0.25255	0.231039	llph/appb/ntn1a/apoeb/cyfip1/nrp1a/kif1b/apoea/katna1/plxnb1a/sema5a/plxnb1b/epha4a/clstn1
GO:0000184	nuclear-transcribed mRNA catabolic process, nonsense-mediated decay	5	0.0260915	0.25255	0.231039	magoh/ncbp2/eif4a3/casc3/rbm8a
GO:0009411	response to UV	5	0.0260915	0.25255	0.231039	mettl3/per2/msh6/uvssa/perp
GO:0006084	acetyl-CoA metabolic process	4	0.0264586	0.253203	0.231637	pmvk/pdha1a/aclya/acss1
GO:0050892	intestinal absorption	4	0.0264586	0.253203	0.231637	apoa4b.1/myo5b/apoa4b.2/si:dkey-7f3.14
GO:0098856	intestinal lipid absorption	4	0.0264586	0.253203	0.231637	apoa4b.1/myo5b/apoa4b.2/si:dkey-7f3.14
GO:0006790	sulfur compound metabolic process	20	0.0272346	0.259651	0.237535	pmvk/cbsb/elovl4b/ndor1/acot16/pdha1a/enoph1/aclya/tpk1/csad/gsto2/acss1/gsr/acot11a/acot18/ggt5a/acot17/mat2al/mat2ab/amd1
GO:0072657	protein localization to membrane	15	0.027785	0.263478	0.241036	rilpl2/dlg1/slc9a3r1a/agk/ssr1/srp54/golph3/dlg1l/exoc4/mief1/agrn/cnsta/sec61b/get4/ssr2
GO:0007623	circadian rhythm	10	0.0278855	0.263478	0.241036	cry1aa/cipca/cipcb/per2/impdh2/per1b/nfil3-6/nr1d1/ciarta/si:ch211-132b12.7
GO:0009064	glutamine family amino acid metabolic process	8	0.0279477	0.263478	0.241036	gls2a/ctps1a/arg2/aldh4a1/asns/si:ch73-71d17.1/gls2b/slc7a7
GO:0071391	cellular response to estrogen stimulus	6	0.0285009	0.267697	0.244897	esr1/serpinc1/hpx/ssr1/lman1/nupr1b
GO:0044262	cellular carbohydrate metabolic process	13	0.028721	0.268769	0.245877	chs1/pgam1a/ppp1r3cb/phkg2/pygb/phkg1b/ugp2a/phka2/ppip5k1b/gcgrb/phkg1a/miox/gck
GO:0048675	axon extension	12	0.0288375	0.268868	0.245967	appb/ntn1a/apoeb/cyfip1/nrp1a/kif1b/apoea/katna1/plxnb1a/sema5a/plxnb1b/epha4a
GO:0048706	embryonic skeletal system development	24	0.029205	0.271296	0.248189	aldh1l1/aldh1a2/hdac1/cx43/egr1/wdr43/scfd1/cnbpa/rnf2/polr1a/med14/dcaf7/ptpn11b/ilvbl/leo1/polr1d/fscn1a/nolc1/caspa/runx3/disp1/rtn4b/ece1/mkxa
GO:0014031	mesenchymal cell development	15	0.0302168	0.277644	0.253996	ctr9/aldh1l1/cdh2/pparda/polr1a/nrp1a/leo1/rcc2/glrx2/plod3/fscn1a/tapt1b/mych/med13b/foxc1b
GO:0014032	neural crest cell development	15	0.0302168	0.277644	0.253996	ctr9/aldh1l1/cdh2/pparda/polr1a/nrp1a/leo1/rcc2/glrx2/plod3/fscn1a/tapt1b/mych/med13b/foxc1b
GO:0048864	stem cell development	15	0.0302168	0.277644	0.253996	ctr9/aldh1l1/cdh2/pparda/polr1a/nrp1a/leo1/rcc2/glrx2/plod3/fscn1a/tapt1b/mych/med13b/foxc1b
GO:0048701	embryonic cranial skeleton morphogenesis	22	0.0303307	0.277684	0.254033	aldh1l1/aldh1a2/egr1/wdr43/scfd1/cnbpa/rnf2/polr1a/med14/dcaf7/ptpn11b/ilvbl/leo1/polr1d/fscn1a/nolc1/caspa/runx3/disp1/rtn4b/ece1/mkxa
GO:0051050	positive regulation of transport	10	0.0312325	0.284912	0.260645	ncbp2/oaz1a/cpsf6/akt2/park7/sgk2b/cacna1ha/sgk3/mief1/cnsta
GO:0048703	embryonic viscerocranium morphogenesis	16	0.0317797	0.288865	0.264262	aldh1l1/aldh1a2/egr1/wdr43/cnbpa/polr1a/med14/dcaf7/ptpn11b/polr1d/fscn1a/caspa/runx3/rtn4b/ece1/mkxa
GO:0034243	regulation of transcription elongation from RNA polymerase II promoter	5	0.0322108	0.291738	0.26689	cdc73/leo1/gtf2f2a/supt16h/supt5h
GO:0006354	DNA-templated transcription, elongation	7	0.0334544	0.300853	0.275228	cdc73/leo1/gtf2f2a/polr2i/elp2/supt16h/supt5h
GO:0035265	organ growth	7	0.0334544	0.300853	0.275228	dia1b/npr2/diexf/cx43/ruvbl1/rap1b/rap1aa
GO:0046890	regulation of lipid biosynthetic process	6	0.033865	0.301794	0.276089	apoeb/apoa4b.1/cnep1r1/apoea/apoa4b.2/si:dkey-7f3.14
GO:0019216	regulation of lipid metabolic process	9	0.033895	0.301794	0.276089	pnpla2/apoeb/noc3l/apoa4b.1/pnpla3/cnep1r1/apoea/apoa4b.2/si:dkey-7f3.14
GO:0006401	RNA catabolic process	16	0.034337	0.301794	0.276089	dis3/mettl3/magoh/ncbp2/heatr1/exosc4/eif4a3/casc3/mtrex/cnot1/rbm8a/exosc2/mrto4/csdc2b/dcp1b/supv3l1
GO:0009156	ribonucleoside monophosphate biosynthetic process	16	0.034337	0.301794	0.276089	ampd2a/prps1a/adssl/impdh2/pgam1a/uck2b/ampd3b/adsl/impdh1b/atp5mc3a/hprt1/upp1/pfklb/adss/ppat/gck
GO:0006030	chitin metabolic process	4	0.0343921	0.301794	0.276089	chs1/chia.1/chia.2/chia.3
GO:0030878	thyroid gland development	4	0.0343921	0.301794	0.276089	bcl2l1/jag1a/ntn1a/kdrl
GO:0048936	peripheral nervous system neuron axonogenesis	4	0.0343921	0.301794	0.276089	ssbp3a/rtn4a/notch3/notch1b
GO:0034655	nucleobase-containing compound catabolic process	25	0.035004	0.306104	0.280032	endog/dis3/mettl3/magoh/ncbp2/pgam1a/cnp/heatr1/exosc4/eif4a3/nudt3a/casc3/mtrex/cnot1/upp1/rbm8a/exosc2/pfklb/mrto4/si:ch211-201h21.5/csdc2b/dcp1b/supv3l1/gck/dnase1l1
GO:0001558	regulation of cell growth	15	0.0355433	0.308691	0.282399	ntn1a/apoeb/osgn1/igfbp5b/igfbp3/epb41l3b/cyr61l2/apoea/sgk2b/socs2/sgk3/supv3l1/epha4a/clstn1/igfbp2b
GO:0006066	alcohol metabolic process	15	0.0355433	0.308691	0.282399	pmvk/aldh1a2/npc2/apoeb/apoa4b.1/rdh10b/nudt3a/dhrs3b/erlin1/apoea/ppip5k1b/lipea/apoa4b.2/si:dkey-7f3.14/miox
GO:0031017	exocrine pancreas development	8	0.036441	0.314035	0.287287	met/hdac1/diexf/pes/nr5a2/ppdpfa/dhps/polr3b
GO:0035272	exocrine system development	8	0.036441	0.314035	0.287287	met/hdac1/diexf/pes/nr5a2/ppdpfa/dhps/polr3b
GO:0007219	Notch signaling pathway	14	0.0366539	0.314035	0.287287	mettl3/maml3/jag1a/appb/id2a/nkap/aph1b/gmds/nle1/uchl3/si:ch211-194k22.8/fbxw7/notch3/notch1b
GO:0071383	cellular response to steroid hormone stimulus	14	0.0366539	0.314035	0.287287	esr1/nr2f5/rxrba/rarga/thrb/nr5a2/pparda/med14/carm1/cnot1/nr1d1/rxraa/nr1h5/nr1i2
GO:0071407	cellular response to organic cyclic compound	17	0.0382509	0.326614	0.298795	mettl3/cyp1a/esr1/nr2f5/rxrba/rarga/thrb/nr5a2/pparda/eif1axb/med14/carm1/cnot1/nr1d1/rxraa/nr1h5/nr1i2
GO:0009267	cellular response to starvation	7	0.0385957	0.327353	0.299472	map1lc3b/cpeb4a/nuak2/depdc5/rragca/rrp8/nupr1b
GO:0031349	positive regulation of defense response	7	0.0385957	0.327353	0.299472	unc93b1/si:ch211-153b23.7/coch/lgr4/lrsam1/mavs/supt5h
GO:0006890	retrograde vesicle-mediated transport, Golgi to ER	5	0.0391535	0.330977	0.302787	copb2/copb1/rer1/rab41/golph3
GO:0016073	snRNA metabolic process	6	0.0398403	0.334553	0.306058	nhp2/exosc4/exosc2/rpap2/ints1/dkc1
GO:0043044	ATP-dependent chromatin remodeling	6	0.0398403	0.334553	0.306058	actl6a/smarca5/anp32b/smarcc1a/psme4b/smarca1
GO:0016570	histone modification	21	0.0409219	0.342501	0.313329	ctr9/hdac1/ruvbl1/prmt1/rnf2/cdc73/hdac3/leo1/fbl/naa50/kat5b/tbl1xr1a/mysm1/sin3aa/ep300b/crebbpa/crebbpb/usp16/noc2l/ezh1/ube2a
GO:0006418	tRNA aminoacylation for protein translation	8	0.0412755	0.343196	0.313964	rars/mars/yars/cars/qars/sars/hars/nars
GO:0055072	iron ion homeostasis	8	0.0412755	0.343196	0.313964	hpx/fth1b/glrx3/hephl1a/meltf/abcb7/aco1/hmox1a
GO:0055123	digestive system development	18	0.0419497	0.346741	0.317208	met/aldh1a2/hdac1/pwp2h/sdc2/diexf/pes/nr5a2/ppdpfa/fgfr2/rbm19/fgfrl1a/dhps/ppm1k/polr3b/myo5b/tsc2/cldn15a
GO:0010001	glial cell differentiation	12	0.0419753	0.346741	0.317208	mettl3/aldh1a2/hdac1/foxa2/pes/cdh2/adgrg1/cdc73/leo1/adcy6b/notch3/slc7a7
GO:0009124	nucleoside monophosphate biosynthetic process	16	0.0429063	0.35328	0.32319	ampd2a/prps1a/adssl/impdh2/pgam1a/uck2b/ampd3b/adsl/impdh1b/atp5mc3a/hprt1/upp1/pfklb/adss/ppat/gck
GO:0050767	regulation of neurogenesis	27	0.0431487	0.354036	0.323882	llph/appb/hdac1/id2a/ntn1a/cdh2/apoeb/stat3/gnl3/adgrg1/nrp1a/mdga2a/kctd12.1/rtn4ip1/eftud2/ndel1a/rbpms2a/apoea/srgap2/si:ch211-194k22.8/plxnb1a/sipa1l1/plxnb1b/notch3/epha4a/clstn1/gnl2
GO:0000302	response to reactive oxygen species	4	0.0435565	0.354036	0.323882	cry1aa/per2/park7/per1a
GO:0007413	axonal fasciculation	4	0.0435565	0.354036	0.323882	cdh2/anos1a/nrp1a/rtn4a
GO:0106030	neuron projection fasciculation	4	0.0435565	0.354036	0.323882	cdh2/anos1a/nrp1a/rtn4a
GO:0031396	regulation of protein ubiquitination	7	0.0442278	0.357203	0.326779	dcun1d2a/ube2d1b/ndfip1/dcun1d1/spopla/spoplb/ube2s
GO:0036503	ERAD pathway	7	0.0442278	0.357203	0.326779	march6/ube4b/psmc6/sdf2/erlin1/ankzf1/foxred2
GO:0009991	response to extracellular stimulus	13	0.0445382	0.357433	0.326989	map1lc3b/nucb2a/bcas3/cpeb4a/cd36/cpt1b/nuak2/depdc5/rragca/gip/rrp8/ghrl/nupr1b
GO:0031667	response to nutrient levels	13	0.0445382	0.357433	0.326989	map1lc3b/nucb2a/bcas3/cpeb4a/cd36/cpt1b/nuak2/depdc5/rragca/gip/rrp8/ghrl/nupr1b
GO:0009755	hormone-mediated signaling pathway	15	0.0447592	0.357453	0.327008	esr1/nr2f5/rxrba/rarga/thrb/nr5a2/pparda/med14/adipor1b/carm1/cnot1/nr1d1/rxraa/nr1h5/nr1i2
GO:0016042	lipid catabolic process	18	0.0448226	0.357453	0.327008	ehhadh/pnpla8/pnpla2/apoeb/apoa4b.1/pla2g12a/pla2g7/lipf/pnpla3/apoea/gba2/pnpla6/plce1/lipea/plcd3a/plbd1/apoa4b.2/si:dkey-7f3.14
GO:0032990	cell part morphogenesis	44	0.0450183	0.357889	0.327406	llph/ssbp3a/appb/sdc2/lamc1/ntn1a/cdh2/apoeb/anos1a/stat3/optn/cyfip1/nrp1a/mycbp2/kif1b/kctd12.1/uba1/stk24b/rbpms2a/rtn4a/elp3/apoea/katna1/stk24a/plod3/srgap2/tnikb/gba2/pnpla6/plxnb1a/sema5a/sipa1l1/agrn/mfn2/plxnb1b/supv3l1/notch3/disp1/epha4a/cdk5/rtn4b/clstn1/notch1b/ptprfb
GO:0001501	skeletal system development	37	0.0455603	0.361065	0.330312	aldh1l1/aldh1a2/gpc4/hdac1/skia/cx43/cdh2/egr1/nr5a2/stat3/wdr43/scfd1/rap1b/cnbpa/rnf2/polr1a/aldh7a1/med14/dcaf7/nrp1a/akt2/fgfrl1a/ptpn11b/ilvbl/igfbp3/leo1/rap1aa/polr1d/fscn1a/tapt1b/nolc1/caspa/runx3/disp1/rtn4b/ece1/mkxa
GO:0031347	regulation of defense response	12	0.0458208	0.361999	0.331166	unc93b1/si:ch211-153b23.7/setd6/cnbpa/coch/tnfrsf1a/pias4a/lgr4/lrsam1/mavs/caspa/supt5h
GO:0006040	amino sugar metabolic process	6	0.0464428	0.364096	0.333085	npl/chs1/chia.1/chia.2/chia.3/gnpda1
GO:0030433	ubiquitin-dependent ERAD pathway	6	0.0464428	0.364096	0.333085	march6/ube4b/psmc6/erlin1/ankzf1/foxred2
GO:0061572	actin filament bundle organization	8	0.046517	0.364096	0.333085	pls1/eps8a/baiap2l2a/myoc/myh10/fscn1a/myh9b/limk1a
GO:0008038	neuron recognition	5	0.0469376	0.365134	0.334034	cdh2/anos1a/nrp1a/mycbp2/rtn4a
GO:0032784	regulation of DNA-templated transcription, elongation	5	0.0469376	0.365134	0.334034	cdc73/leo1/gtf2f2a/supt16h/supt5h
GO:0015850	organic hydroxy compound transport	9	0.047433	0.365662	0.334517	abca5/npc2/apoeb/apoa4b.1/slc51a/apoea/abcg2c/apoa4b.2/si:dkey-7f3.14
GO:0006479	protein methylation	10	0.047438	0.365662	0.334517	ctr9/prmt1/setd6/prmt5/ntmt1/fbl/carm1/smyd2a/trmt112/ezh1
GO:0008213	protein alkylation	10	0.047438	0.365662	0.334517	ctr9/prmt1/setd6/prmt5/ntmt1/fbl/carm1/smyd2a/trmt112/ezh1
GO:0040008	regulation of growth	18	0.0478338	0.367595	0.336286	ntn1a/apoeb/tgfbr2b/ruvbl1/osgn1/igfbp5b/igfbp3/epb41l3b/cyr61l2/apoea/sec14l8/sgk2b/socs2/sgk3/supv3l1/epha4a/clstn1/igfbp2b
GO:0010629	negative regulation of gene expression	55	0.0485597	0.372046	0.340358	cry1aa/mettl3/magoh/ago4/cipca/cipcb/ncbp2/id2a/rxrba/smad2/id2b/rbmx/eif1axb/ndfip1/rnf2/nkap/xiap/hes6/ncor1/exosc4/cpeb4a/hdac3/eif4a3/casc3/junba/hic1/sars/cnot1/eif4ebp3/rbm8a/smyd2a/exosc2/mrto4/pbxip1b/nfia/csdc2b/cica/riox1/ncor2/trim71/pbxip1a/bhlhe41/si:ch211-132b12.7/dcp1b/supv3l1/noc2l/supt5h/nfixb/pphln1/bahcc1b/relb/rrp8/mkxa/eif4ebp1/cry2
GO:0000122	negative regulation of transcription by RNA polymerase II	16	0.0494053	0.377385	0.345242	smad2/rnf2/ncor1/hdac3/junba/hic1/sars/cnot1/smyd2a/nfia/cica/ncor2/noc2l/supt5h/nfixb/relb
GO:1903320	regulation of protein modification by small protein conjugation or removal	7	0.0503623	0.38354	0.350873	dcun1d2a/ube2d1b/ndfip1/dcun1d1/spopla/spoplb/ube2s
GO:0048812	neuron projection morphogenesis	43	0.0513395	0.386693	0.353757	llph/ssbp3a/appb/sdc2/lamc1/ntn1a/cdh2/apoeb/anos1a/stat3/optn/cyfip1/nrp1a/mycbp2/kif1b/kctd12.1/uba1/stk24b/rbpms2a/rtn4a/elp3/apoea/katna1/stk24a/plod3/srgap2/tnikb/gba2/pnpla6/plxnb1a/sema5a/sipa1l1/agrn/mfn2/plxnb1b/notch3/disp1/epha4a/cdk5/rtn4b/clstn1/notch1b/ptprfb
GO:0120039	plasma membrane bounded cell projection morphogenesis	43	0.0513395	0.386693	0.353757	llph/ssbp3a/appb/sdc2/lamc1/ntn1a/cdh2/apoeb/anos1a/stat3/optn/cyfip1/nrp1a/mycbp2/kif1b/kctd12.1/uba1/stk24b/rbpms2a/rtn4a/elp3/apoea/katna1/stk24a/plod3/srgap2/tnikb/gba2/pnpla6/plxnb1a/sema5a/sipa1l1/agrn/mfn2/plxnb1b/notch3/disp1/epha4a/cdk5/rtn4b/clstn1/notch1b/ptprfb
GO:0051960	regulation of nervous system development	28	0.0520286	0.386693	0.353757	llph/appb/hdac1/id2a/ntn1a/cdh2/apoeb/stat3/gnl3/adgrg1/nrp1a/mdga2a/kctd12.1/rtn4ip1/eftud2/ndel1a/rbpms2a/apoea/srgap2/si:ch211-194k22.8/plxnb1a/sipa1l1/fbxw7/plxnb1b/notch3/epha4a/clstn1/gnl2
GO:0007179	transforming growth factor beta receptor signaling pathway	8	0.0521747	0.386693	0.353757	ppm1bb/skia/smad2/tgfbr2b/si:rp71-46j2.7/dusp22a/rlim/smad3a
GO:0043038	amino acid activation	8	0.0521747	0.386693	0.353757	rars/mars/yars/cars/qars/sars/hars/nars
GO:0043039	tRNA aminoacylation	8	0.0521747	0.386693	0.353757	rars/mars/yars/cars/qars/sars/hars/nars
GO:0071559	response to transforming growth factor beta	8	0.0521747	0.386693	0.353757	ppm1bb/skia/smad2/tgfbr2b/si:rp71-46j2.7/dusp22a/rlim/smad3a
GO:0071560	cellular response to transforming growth factor beta stimulus	8	0.0521747	0.386693	0.353757	ppm1bb/skia/smad2/tgfbr2b/si:rp71-46j2.7/dusp22a/rlim/smad3a
GO:0000956	nuclear-transcribed mRNA catabolic process	10	0.0522337	0.386693	0.353757	magoh/ncbp2/exosc4/eif4a3/casc3/cnot1/rbm8a/exosc2/mrto4/dcp1b
GO:0042063	gliogenesis	13	0.0523012	0.386693	0.353757	mettl3/aldh1a2/hdac1/foxa2/pes/cdh2/stat3/adgrg1/cdc73/leo1/adcy6b/notch3/slc7a7
GO:0060216	definitive hemopoiesis	9	0.0526412	0.388076	0.355022	smarcd1/gar1/kri1/smarcc1a/sumo3a/sumo1/smyd5/hsp70l/dkc1
GO:0018193	peptidyl-amino acid modification	48	0.0531391	0.389516	0.35634	ctr9/prkcdb/ptk2bb/ruvbl1/prmt1/setd6/camk1ga/dpy19l1l/prmt5/mknk2b/hif1an/akt2/eif4a1a/chuk/phkg2/ntmt1/dhps/sumo3a/sumo1/stk38a/mapkapk5/naa50/ppifa/prkca/kat5b/pop5/smyd2a/ppie/phkg1b/csk/sgk2b/riox1/pkn1a/camk2b1/dph2/sgk3/tnk1/senp3b/phkg1a/ep300b/crebbpa/crebbpb/frk/asphd2/senp5/noc2l/ezh1/camk2g1
GO:0048858	cell projection morphogenesis	43	0.0532491	0.389516	0.35634	llph/ssbp3a/appb/sdc2/lamc1/ntn1a/cdh2/apoeb/anos1a/stat3/optn/cyfip1/nrp1a/mycbp2/kif1b/kctd12.1/uba1/stk24b/rbpms2a/rtn4a/elp3/apoea/katna1/stk24a/plod3/srgap2/tnikb/gba2/pnpla6/plxnb1a/sema5a/sipa1l1/agrn/mfn2/plxnb1b/notch3/disp1/epha4a/cdk5/rtn4b/clstn1/notch1b/ptprfb
GO:0006541	glutamine metabolic process	4	0.0539536	0.389516	0.35634	gls2a/ctps1a/asns/gls2b
GO:0008637	apoptotic mitochondrial changes	4	0.0539536	0.389516	0.35634	bnip3la/rhot1a/atg3/apopt1
GO:0035384	thioester biosynthetic process	4	0.0539536	0.389516	0.35634	elovl4b/pdha1a/aclya/acss1
GO:0043174	nucleoside salvage	4	0.0539536	0.389516	0.35634	adkb/uck2b/hprt1/upp1
GO:0071616	acyl-CoA biosynthetic process	4	0.0539536	0.389516	0.35634	elovl4b/pdha1a/aclya/acss1
GO:0031099	regeneration	24	0.0540653	0.389516	0.35634	aldh1a2/hdac1/cx43/cdh2/apoeb/stat3/scfd1/rbbp4/apoa4b.1/cnp/mvp/hspa9/tnfrsf1a/lgmn/mtrex/apoea/ide/apoa4b.2/si:dkey-7f3.14/epha4a/rtn4b/mgat5/gck/notch1b
GO:0006904	vesicle docking involved in exocytosis	5	0.0555726	0.399241	0.365237	scfd1/stxbp3/rab10/vps33a/exoc4
GO:0060485	mesenchyme development	24	0.0569068	0.402328	0.36806	ctr9/aldh1l1/aldh1a2/cdh2/pparda/stat3/cnbpa/polr1a/parp3/ncln/med14/fgfr2/nrp1a/leo1/rcc2/glrx2/plod3/fscn1a/tapt1b/mych/med13b/notch3/mcrip1/foxc1b
GO:0006414	translational elongation	7	0.0570081	0.402328	0.36806	eif5a2/eef2k/tufm/eef1db/dph2/usp16/eefsec
GO:0051402	neuron apoptotic process	7	0.0570081	0.402328	0.36806	hm13/apoeb/cpeb4a/park7/pink1/apoea/cdk5
GO:0018209	peptidyl-serine modification	17	0.0572747	0.402328	0.36806	prkcdb/camk1ga/mknk2b/akt2/chuk/phkg2/ntmt1/stk38a/mapkapk5/prkca/phkg1b/sgk2b/pkn1a/camk2b1/sgk3/phkg1a/camk2g1
GO:0042572	retinol metabolic process	3	0.0578965	0.402328	0.36806	aldh1a2/rdh10b/dhrs3b
GO:0044058	regulation of digestive system process	3	0.0578965	0.402328	0.36806	apoa4b.1/apoa4b.2/si:dkey-7f3.14
GO:0045103	intermediate filament-based process	3	0.0578965	0.402328	0.36806	tor1l3/ndel1a/tor1
GO:0045104	intermediate filament cytoskeleton organization	3	0.0578965	0.402328	0.36806	tor1l3/ndel1a/tor1
GO:0045923	positive regulation of fatty acid metabolic process	3	0.0578965	0.402328	0.36806	apoa4b.1/apoa4b.2/si:dkey-7f3.14
GO:0110020	regulation of actomyosin structure organization	3	0.0578965	0.402328	0.36806	smyd2a/myoc/limk1a
GO:1903829	positive regulation of cellular protein localization	3	0.0578965	0.402328	0.36806	oaz1a/mief1/cnsta
GO:0045664	regulation of neuron differentiation	21	0.057906	0.402328	0.36806	llph/appb/id2a/ntn1a/cdh2/apoeb/gnl3/nrp1a/kctd12.1/rtn4ip1/eftud2/ndel1a/rbpms2a/apoea/si:ch211-194k22.8/plxnb1a/sipa1l1/plxnb1b/epha4a/clstn1/gnl2
GO:0009636	response to toxic substance	10	0.0627627	0.43488	0.39784	cry1aa/abcb4/ache/per2/chrne/park7/gsto2/gstp2/per1a/nr1i2
GO:0009894	regulation of catabolic process	22	0.0640833	0.438648	0.401286	mettl3/pnpla2/oaz1a/psme3/apoa4b.1/pgam1a/heatr1/trib3/pnpla3/cnot1/si:ch211-260e23.9/csdc2b/lonrf1/lrsam1/depdc5/ankib1a/si:ch211-284e13.9/apoa4b.2/si:dkey-7f3.14/supv3l1/rragca/rhbdf1a
GO:0031668	cellular response to extracellular stimulus	7	0.0641712	0.438648	0.401286	map1lc3b/cpeb4a/nuak2/depdc5/rragca/rrp8/nupr1b
GO:0031669	cellular response to nutrient levels	7	0.0641712	0.438648	0.401286	map1lc3b/cpeb4a/nuak2/depdc5/rragca/rrp8/nupr1b
GO:0043648	dicarboxylic acid metabolic process	7	0.0641712	0.438648	0.401286	gls2a/aldh1l1/mdh1ab/aldh4a1/si:ch73-71d17.1/mdh2/me3
GO:0140029	exocytic process	7	0.0641712	0.438648	0.401286	scfd1/snap23.1/stxbp3/rab10/vps33a/exoc4/snap47
GO:0072594	establishment of protein localization to organelle	17	0.0648599	0.441901	0.404263	cse1l/nup50/agk/vps36/timm50/heatr3/srp54/nup133/ipo9/pmpca/timm44/ipo4/tprb/grpel1/lrsam1/kpna1/sec61b
GO:0034637	cellular carbohydrate biosynthetic process	5	0.06506	0.441901	0.404263	chs1/ppp1r3cb/phkg2/phkg1b/phkg1a
GO:0032446	protein modification by small protein conjugation	35	0.06517	0.441901	0.404263	ube2g1b/ddb2/rnf139/ube4b/dcun1d2a/ufm1/asb12a/wsb1/ube2d1b/ndfip1/rnf2/dcun1d1/ube2g1a/dcaf13/uvssa/klhl21/sumo3a/sumo1/fbxw5/ube2v2/kctd6b/ctu2/crbn/rnf24/spopla/spoplb/lonrf1/trim71/socs2/rnf213b/ube2s/ankib1a/si:ch211-284e13.9/socs5a/ube2a
GO:0055081	anion homeostasis	4	0.0655677	0.443412	0.405645	calca/enpp1/slc26a3.1/slc34a2a
GO:0034404	nucleobase-containing small molecule biosynthetic process	14	0.0670232	0.45205	0.413547	impdh2/ctps1a/adkb/pgam1a/cnp/uck2b/impdh1b/nudt3a/qtrt2/hprt1/upp1/pfklb/gck/amd1
GO:0030334	regulation of cell migration	18	0.0689517	0.463823	0.424318	mt2/aldh1l1/cxcl8b.1/cxcl11.5/gpc4/ptk2bb/prox1a/gnb1a/nrp1a/mdga2a/arrb2b/cnn2/rtn4a/myoc/srgap2/vegfab/tnfrsf19/sst2
GO:0002066	columnar/cuboidal epithelial cell development	6	0.0701063	0.467868	0.428018	cdh2/dhps/tm4sf4/cobl/ide/gck
GO:0016126	sterol biosynthetic process	6	0.0701063	0.467868	0.428018	pmvk/apoeb/apoa4b.1/apoea/apoa4b.2/si:dkey-7f3.14
GO:0043627	response to estrogen	6	0.0701063	0.467868	0.428018	esr1/serpinc1/hpx/ssr1/lman1/nupr1b
GO:0031329	regulation of cellular catabolic process	21	0.071664	0.47515	0.434679	mettl3/pnpla2/psme3/apoa4b.1/pgam1a/heatr1/trib3/pnpla3/cnot1/si:ch211-260e23.9/csdc2b/lonrf1/lrsam1/depdc5/ankib1a/si:ch211-284e13.9/apoa4b.2/si:dkey-7f3.14/supv3l1/rragca/rhbdf1a
GO:2000145	regulation of cell motility	19	0.072706	0.47515	0.434679	mt2/aldh1l1/cxcl8b.1/cxcl11.5/zeb1b/gpc4/ptk2bb/prox1a/gnb1a/nrp1a/mdga2a/arrb2b/cnn2/rtn4a/myoc/srgap2/vegfab/tnfrsf19/sst2
GO:1901605	alpha-amino acid metabolic process	16	0.0729597	0.47515	0.434679	gls2a/cbsb/azin1b/ctps1a/arg2/sephs1/kyat3/aldh4a1/hibadhb/asns/si:ch73-71d17.1/enoph1/afmid/gls2b/zgc:172341/slc7a7
GO:0000959	mitochondrial RNA metabolic process	3	0.0742908	0.47515	0.434679	elac2/tfb2m/supv3l1
GO:0010594	regulation of endothelial cell migration	3	0.0742908	0.47515	0.434679	mt2/nrp1a/cnn2
GO:0010632	regulation of epithelial cell migration	3	0.0742908	0.47515	0.434679	mt2/nrp1a/cnn2
GO:0021654	rhombomere boundary formation	3	0.0742908	0.47515	0.434679	notch3/epha4a/notch1b
GO:0030488	tRNA methylation	3	0.0742908	0.47515	0.434679	nsun2/ftsj1/trmt112
GO:0031125	rRNA 3'-end processing	3	0.0742908	0.47515	0.434679	gnl3/exosc4/exosc2
GO:0032922	circadian regulation of gene expression	3	0.0742908	0.47515	0.434679	nfil3-6/nr1d1/ciarta
GO:0043535	regulation of blood vessel endothelial cell migration	3	0.0742908	0.47515	0.434679	mt2/nrp1a/cnn2
GO:0048009	insulin-like growth factor receptor signaling pathway	3	0.0742908	0.47515	0.434679	igfbp5b/igfbp3/igfbp2b
GO:0048318	axial mesoderm development	3	0.0742908	0.47515	0.434679	aldh1a2/foxa2/cdh2
GO:0051601	exocyst localization	3	0.0742908	0.47515	0.434679	exoc3l4/exoc3l2b/tnfaip2a
GO:0061951	establishment of protein localization to plasma membrane	3	0.0742908	0.47515	0.434679	rilpl2/golph3/cnsta
GO:1901654	response to ketone	3	0.0742908	0.47515	0.434679	cyp2k22/ndor1/park7
GO:0006979	response to oxidative stress	10	0.07457	0.47515	0.434679	cry1aa/per2/mpx/nfe2l2a/txnl1/msrb3/park7/lonp1/per1a/hmox1a
GO:0055076	transition metal ion homeostasis	10	0.07457	0.47515	0.434679	hpx/slc30a1a/fth1b/glrx3/slc30a9/hephl1a/meltf/abcb7/aco1/hmox1a
GO:0031398	positive regulation of protein ubiquitination	5	0.0753931	0.475614	0.435104	dcun1d2a/ube2d1b/ndfip1/dcun1d1/ube2s
GO:0042451	purine nucleoside biosynthetic process	5	0.0753931	0.475614	0.435104	impdh2/adkb/impdh1b/hprt1/amd1
GO:0046129	purine ribonucleoside biosynthetic process	5	0.0753931	0.475614	0.435104	impdh2/adkb/impdh1b/hprt1/amd1
GO:1901343	negative regulation of vasculature development	5	0.0753931	0.475614	0.435104	per2/ntn1a/hif1an/sars/dab2ipb
GO:0048882	lateral line development	13	0.0756031	0.475755	0.435234	aldh1l1/esr1/anos1a/prox1a/stat3/setb/gnb1a/hdac3/rtn4a/tnfrsf19/wnk1b/rtn4b/mgat5
GO:0002181	cytoplasmic translation	9	0.0771172	0.482846	0.44172	mettl3/rpl7l1/rpl7/cpeb4a/eif4h/eif3jb/rwdd1/ftsj1/dph2
GO:0048667	cell morphogenesis involved in neuron differentiation	39	0.0772346	0.482846	0.44172	ssbp3a/appb/sdc2/lamc1/ntn1a/cdh2/apoeb/anos1a/stat3/optn/cyfip1/nrp1a/mycbp2/kif1b/kctd12.1/uba1/rbpms2a/rtn4a/cobl/elp3/apoea/katna1/plod3/gba2/pnpla6/plxnb1a/sema5a/sipa1l1/agrn/mfn2/plxnb1b/notch3/disp1/epha4a/cdk5/rtn4b/clstn1/notch1b/ptprfb
GO:0007005	mitochondrion organization	23	0.077301	0.482846	0.44172	atg9a/si:dkey-251i10.1/map1lc3b/bnip3la/rhot1a/agk/dnaja3a/atg3/timm50/bcs1l/miga1/pmpca/pink1/timm44/grpel1/lonp1/mief1/mfn2/supv3l1/ndufaf7/fundc2/yme1l1a/apopt1
GO:0035904	aorta development	4	0.0783673	0.487107	0.445618	cdkn1a/ntn1a/notch3/notch1b
GO:0043113	receptor clustering	4	0.0783673	0.487107	0.445618	dlg1/slc9a3r1a/dlg1l/agrn
GO:0006022	aminoglycan metabolic process	8	0.0790891	0.489231	0.447561	ugdh/chs1/gnsb/chia.1/chia.2/chia.3/pxylp1/pglyrp2
GO:0043523	regulation of neuron apoptotic process	6	0.0792878	0.489231	0.447561	hm13/apoeb/cpeb4a/park7/apoea/cdk5
GO:0045089	positive regulation of innate immune response	6	0.0792878	0.489231	0.447561	unc93b1/si:ch211-153b23.7/coch/lgr4/mavs/supt5h
GO:0017038	protein import	12	0.0795871	0.489885	0.44816	cse1l/nup50/agk/timm50/heatr3/nup133/ipo9/timm44/ipo4/tprb/grpel1/kpna1
GO:0071496	cellular response to external stimulus	7	0.0800599	0.491603	0.449731	map1lc3b/cpeb4a/nuak2/depdc5/rragca/rrp8/nupr1b
GO:0006402	mRNA catabolic process	13	0.0809548	0.495897	0.45366	mettl3/magoh/ncbp2/exosc4/eif4a3/casc3/cnot1/rbm8a/exosc2/mrto4/csdc2b/dcp1b/supv3l1
GO:0018105	peptidyl-serine phosphorylation	16	0.0822288	0.502487	0.459689	prkcdb/camk1ga/mknk2b/akt2/chuk/phkg2/stk38a/mapkapk5/prkca/phkg1b/sgk2b/pkn1a/camk2b1/sgk3/phkg1a/camk2g1
GO:0033993	response to lipid	24	0.0835128	0.509107	0.465745	si:ch211-153b23.7/cxcl8b.1/cxcl11.5/esr1/nr2f5/rxrba/rarga/thrb/nr5a2/pparda/med14/nfe2l2a/cyp2k22/tnfrsf1a/junba/cd36/carm1/cnot1/nr1d1/fabp1b.1/rxraa/nr1h5/nr1i2/zgc:153631
GO:0042180	cellular ketone metabolic process	9	0.0841634	0.511843	0.468247	apoa4b.1/hagh/kyat3/hsd17b3/park7/afmid/apoa4b.2/si:dkey-7f3.14/slc7a7
GO:0007507	heart development	53	0.0851669	0.516707	0.472697	ctr9/dia1b/npr2/aldh1l1/ugdh/snrpd1/smarca5/sdc2/skia/ntn1a/cx43/cdh2/prox1a/tie1/ruvbl1/pdcd4b/rap1b/fgfr2/nrp1a/cdc73/ilk/ttc4/surf6/nop56/smarcc1a/leo1/trib3/stk24b/rbfox1l/zfpm1/rap1aa/glrx2/csad/rhoua/tln1/cobl/ppm1k/smyd2a/dchs1b/dsc2l/mbnl2/smarcd3b/ltbp3/eif3hb/ttc17/plekha7a/atp1a1a.1/ncl/camk2g1/kdrl/apln/ghrl/muc13b
GO:1903322	positive regulation of protein modification by small protein conjugation or removal	5	0.0865579	0.523359	0.478783	dcun1d2a/ube2d1b/ndfip1/dcun1d1/ube2s
GO:0009890	negative regulation of biosynthetic process	45	0.0869095	0.523359	0.478783	cry1aa/mettl3/ago4/cipca/cipcb/id2a/rxrba/smad2/id2b/eif1axb/rnf2/nkap/hes6/ncor1/cpeb4a/hdac3/itm2bb/junba/hic1/sars/cnot1/park7/eif4ebp3/smyd2a/pbxip1b/nfia/cica/riox1/ncor2/trim71/hrh3/pbxip1a/bhlhe41/si:ch211-132b12.7/noc2l/supt5h/nfixb/pphln1/bahcc1b/relb/rrp8/igfbp2b/mkxa/eif4ebp1/cry2
GO:0048880	sensory system development	14	0.0871256	0.523359	0.478783	aldh1l1/esr1/anos1a/prox1a/stat3/setb/gnb1a/kif1b/hdac3/rtn4a/tnfrsf19/wnk1b/rtn4b/mgat5
GO:0048925	lateral line system development	14	0.0871256	0.523359	0.478783	aldh1l1/esr1/anos1a/prox1a/stat3/setb/gnb1a/kif1b/hdac3/rtn4a/tnfrsf19/wnk1b/rtn4b/mgat5
GO:0002244	hematopoietic progenitor cell differentiation	15	0.0872953	0.523359	0.478783	mettl3/jag1a/hdac1/tgfbr2b/wdr43/smarcd1/nap1l4a/fgfr2/sf3a3/ncor2/lrsam1/crebbpa/notch3/supt5h/notch1b
GO:0000904	cell morphogenesis involved in differentiation	42	0.0878246	0.525291	0.48055	mettl3/rilpl2/ssbp3a/appb/sdc2/lamc1/ntn1a/cdh2/apoeb/anos1a/stat3/optn/cyfip1/nrp1a/mycbp2/kif1b/kctd12.1/ilk/uba1/rbpms2a/rtn4a/cobl/elp3/apoea/katna1/plod3/gba2/pnpla6/plxnb1a/sema5a/sipa1l1/agrn/mfn2/plxnb1b/notch3/disp1/epha4a/cdk5/rtn4b/clstn1/notch1b/ptprfb
GO:0001817	regulation of cytokine production	6	0.0891092	0.529389	0.4843	mt2/pias4a/sars/csk/lgr4/mavs
GO:0051668	localization within membrane	6	0.0891092	0.529389	0.4843	rilpl2/dlg1/slc9a3r1a/nup133/dlg1l/agrn
GO:1901342	regulation of vasculature development	12	0.0915299	0.529389	0.4843	mt2/per2/ptk2bb/ntn1a/nrp1a/hif1an/elmo1/sars/vegfab/dab2ipb/mep1a.2/lrp1ab
GO:0006974	cellular response to DNA damage stimulus	40	0.0922045	0.529389	0.4843	uba7/ddb2/mettl3/bcl2l1/msh6/id2a/ruvbl1/gtf2h2/ddx39aa/xrcc6/parp3/yars/neil1/chd1l/rbm17/uvssa/eepd1/cry-dash/ddx39ab/uba1/hmga1a/ube2v2/hic1/park7/polr2i/nabp1a/smyd2a/psme4b/tdg.1/tp53bp1/ints3/prkdc/lig3/pds5b/si:dkey-82j4.2/usp16/si:dkey-28b4.7/dek/ube2a/cry5
GO:0071396	cellular response to lipid	16	0.0922287	0.529389	0.4843	si:ch211-153b23.7/esr1/nr2f5/rxrba/rarga/thrb/nr5a2/pparda/med14/nfe2l2a/carm1/cnot1/nr1d1/rxraa/nr1h5/nr1i2
GO:0009127	purine nucleoside monophosphate biosynthetic process	13	0.0923635	0.529389	0.4843	ampd2a/adssl/impdh2/pgam1a/ampd3b/adsl/impdh1b/atp5mc3a/hprt1/pfklb/adss/ppat/gck
GO:0009168	purine ribonucleoside monophosphate biosynthetic process	13	0.0923635	0.529389	0.4843	ampd2a/adssl/impdh2/pgam1a/ampd3b/adsl/impdh1b/atp5mc3a/hprt1/pfklb/adss/ppat/gck
GO:0006584	catecholamine metabolic process	3	0.0924762	0.529389	0.4843	sult1st1/sult1st3/comta
GO:0009712	catechol-containing compound metabolic process	3	0.0924762	0.529389	0.4843	sult1st1/sult1st3/comta
GO:0030299	intestinal cholesterol absorption	3	0.0924762	0.529389	0.4843	apoa4b.1/apoa4b.2/si:dkey-7f3.14
GO:0034472	snRNA 3'-end processing	3	0.0924762	0.529389	0.4843	exosc4/exosc2/ints1
GO:0046902	regulation of mitochondrial membrane permeability	3	0.0924762	0.529389	0.4843	si:dkey-251i10.1/bnip3la/rhot1a
GO:0051443	positive regulation of ubiquitin-protein transferase activity	3	0.0924762	0.529389	0.4843	dcun1d2a/dcun1d1/ube2s
GO:0055090	acylglycerol homeostasis	3	0.0924762	0.529389	0.4843	apoa4b.1/apoa4b.2/si:dkey-7f3.14
GO:0070328	triglyceride homeostasis	3	0.0924762	0.529389	0.4843	apoa4b.1/apoa4b.2/si:dkey-7f3.14
GO:0071025	RNA surveillance	3	0.0924762	0.529389	0.4843	exosc4/exosc2/supv3l1
GO:0090559	regulation of membrane permeability	3	0.0924762	0.529389	0.4843	si:dkey-251i10.1/bnip3la/rhot1a
GO:2000177	regulation of neural precursor cell proliferation	3	0.0924762	0.529389	0.4843	cdh2/adgrg1/trim71
GO:2000765	regulation of cytoplasmic translation	3	0.0924762	0.529389	0.4843	mettl3/cpeb4a/dph2
GO:0006606	protein import into nucleus	8	0.0951491	0.541027	0.494946	cse1l/nup50/heatr3/nup133/ipo9/ipo4/tprb/kpna1
GO:0034504	protein localization to nucleus	8	0.0951491	0.541027	0.494946	cse1l/nup50/heatr3/nup133/ipo9/ipo4/tprb/kpna1
GO:0051170	import into nucleus	8	0.0951491	0.541027	0.494946	cse1l/nup50/heatr3/nup133/ipo9/ipo4/tprb/kpna1
GO:0021903	rostrocaudal neural tube patterning	7	0.0980214	0.553635	0.50648	hdac1/calm1a/slc7a6os/myh10/myh9b/creb1a/atp1a1a.1
GO:0045088	regulation of innate immune response	7	0.0980214	0.553635	0.50648	unc93b1/si:ch211-153b23.7/coch/pias4a/lgr4/mavs/supt5h
GO:0070997	neuron death	7	0.0980214	0.553635	0.50648	hm13/apoeb/cpeb4a/park7/pink1/apoea/cdk5
GO:0043171	peptide catabolic process	5	0.0985336	0.55406	0.506869	anpepb/npepps/enpep/anpepa/ggt5a
GO:0050919	negative chemotaxis	5	0.0985336	0.55406	0.506869	sema4bb/sema5a/sema4ga/sema3b/sema4ab
GO:0048193	Golgi vesicle transport	16	0.102965	0.5777	0.528495	copb2/sec22ba/scfd1/copb1/rer1/trappc4/rab41/golga5/rabif/golph3/stx6/sec16b/lman1/exoc4/nrbp2b/cnsta
GO:0016579	protein deubiquitination	11	0.103702	0.579827	0.530441	usp24/uchl5/abraxas2b/otub1a/uchl3/usp12b/mysm1/usp38/usp2b/usp16/usp37
GO:0007015	actin filament organization	24	0.103802	0.579827	0.530441	dlg1/gsna/pfn2l/pls1/vil1/eps8a/baiap2l2a/pfn2/twf1b/mybpc1/cobl/dlg1l/sorbs3/myoc/myh10/arpc5lb/fscn1a/myh9b/hcls1/ttc17/limk1a/fryb/tmsb1/pfn1
GO:0006605	protein targeting	12	0.104512	0.582513	0.532898	slc9a3r1a/agk/ssr1/timm50/srp54/pmpca/timm44/grpel1/exoc4/mief1/sec61b/ssr2
GO:0043087	regulation of GTPase activity	18	0.105779	0.58396	0.534222	iqgap1/arhgap35a/dnmbp/rabif/rabgap1l/dab2ipb/ralgapb/myo9b/plxnb1a/sipa1l1/iqgap2/rasa1b/tsc2/tiam1a/plxnb1b/chn2/si:dkey-238d18.4/rasal3
GO:0010558	negative regulation of macromolecule biosynthetic process	43	0.106244	0.58396	0.534222	cry1aa/mettl3/ago4/cipca/cipcb/id2a/rxrba/smad2/id2b/eif1axb/rnf2/nkap/hes6/ncor1/cpeb4a/hdac3/itm2bb/junba/hic1/sars/cnot1/eif4ebp3/smyd2a/pbxip1b/nfia/cica/riox1/ncor2/trim71/pbxip1a/bhlhe41/si:ch211-132b12.7/noc2l/supt5h/nfixb/pphln1/bahcc1b/relb/rrp8/igfbp2b/mkxa/eif4ebp1/cry2
GO:2000113	negative regulation of cellular macromolecule biosynthetic process	43	0.106244	0.58396	0.534222	cry1aa/mettl3/ago4/cipca/cipcb/id2a/rxrba/smad2/id2b/eif1axb/rnf2/nkap/hes6/ncor1/cpeb4a/hdac3/itm2bb/junba/hic1/sars/cnot1/eif4ebp3/smyd2a/pbxip1b/nfia/cica/riox1/ncor2/trim71/pbxip1a/bhlhe41/si:ch211-132b12.7/noc2l/supt5h/nfixb/pphln1/bahcc1b/relb/rrp8/igfbp2b/mkxa/eif4ebp1/cry2
GO:0016567	protein ubiquitination	31	0.107253	0.58396	0.534222	ube2g1b/ddb2/rnf139/ube4b/dcun1d2a/asb12a/wsb1/ube2d1b/ndfip1/rnf2/dcun1d1/ube2g1a/dcaf13/uvssa/klhl21/fbxw5/ube2v2/kctd6b/crbn/rnf24/spopla/spoplb/lonrf1/trim71/socs2/rnf213b/ube2s/ankib1a/si:ch211-284e13.9/socs5a/ube2a
GO:0002687	positive regulation of leukocyte migration	4	0.107332	0.58396	0.534222	cxcl8b.1/cxcl11.5/gnb1a/vegfab
GO:0014003	oligodendrocyte development	4	0.107332	0.58396	0.534222	aldh1a2/foxa2/adgrg1/notch3
GO:0043524	negative regulation of neuron apoptotic process	4	0.107332	0.58396	0.534222	apoeb/cpeb4a/apoea/cdk5
GO:1903313	positive regulation of mRNA metabolic process	4	0.107332	0.58396	0.534222	mettl3/dhx37/rbmx/cnot1
GO:0008285	negative regulation of cell proliferation	9	0.107531	0.58396	0.534222	hdac1/cdh2/ing2/smyd2a/tmem127/si:ch211-260e23.9/dab2ipb/mfn2/igfbp2b
GO:0022406	membrane docking	7	0.107765	0.58396	0.534222	cep83/scfd1/stxbp3/rab10/vps33a/stx6/exoc4
GO:0048278	vesicle docking	7	0.107765	0.58396	0.534222	cep83/scfd1/stxbp3/rab10/vps33a/stx6/exoc4
GO:0090288	negative regulation of cellular response to growth factor stimulus	7	0.107765	0.58396	0.534222	ppm1bb/skia/si:rp71-46j2.7/igfbp3/dab2ipb/pnpla6/supt5h
GO:0140056	organelle localization by membrane tethering	7	0.107765	0.58396	0.534222	cep83/scfd1/stxbp3/rab10/vps33a/stx6/exoc4
GO:0032870	cellular response to hormone stimulus	24	0.108207	0.585103	0.535267	esr1/nr2f5/rxrba/rarga/thrb/nr5a2/pparda/med14/nfe2l2a/stat5a/baiap2l2a/adipor1b/junba/rab10/carm1/cnot1/nr1d1/sik1/rxraa/nr1h5/socs2/agrn/nr1i2/tsc2
GO:0031327	negative regulation of cellular biosynthetic process	44	0.109816	0.585897	0.535994	cry1aa/mettl3/ago4/cipca/cipcb/id2a/rxrba/smad2/id2b/eif1axb/rnf2/nkap/hes6/ncor1/cpeb4a/hdac3/itm2bb/junba/hic1/sars/cnot1/eif4ebp3/smyd2a/pbxip1b/nfia/cica/riox1/ncor2/trim71/hrh3/pbxip1a/bhlhe41/si:ch211-132b12.7/noc2l/supt5h/nfixb/pphln1/bahcc1b/relb/rrp8/igfbp2b/mkxa/eif4ebp1/cry2
GO:0006732	coenzyme metabolic process	21	0.11028	0.585897	0.535994	pmvk/nampta/aldh1l1/pgam1a/elovl4b/acot16/pdha1a/fpgs/aclya/flad1/tpk1/acss1/pfklb/afmid/acot11a/acot18/acot17/mat2al/gck/mat2ab/mocs1
GO:0051094	positive regulation of developmental process	21	0.11028	0.585897	0.535994	llph/cactin/mt2/hdac1/smad2/stat3/nrp1a/stat5a/elmo1/junba/carm1/pink1/vegfab/sec14l8/tapt1b/si:ch211-194k22.8/plxnb1a/mief1/mep1a.2/plxnb1b/supt5h
GO:0061564	axon development	39	0.110702	0.585897	0.535994	ssbp3a/appb/lamc1/ntn1a/cdh2/apoeb/anos1a/stat3/cnp/optn/cyfip1/nrp1a/mycbp2/kif1b/uba1/lgmn/rbpms2a/rab10/rtn4a/elp3/apoea/katna1/plod3/gba2/pnpla6/plxnb1a/sema5a/agrn/myo5b/mfn2/plxnb1b/notch3/disp1/epha4a/cdk5/rtn4b/clstn1/notch1b/ptprfb
GO:0061448	connective tissue development	18	0.111103	0.585897	0.535994	gpc4/skia/cdh2/nr5a2/scfd1/rap1b/cnbpa/rnf2/aldh7a1/dcaf7/nrp1a/fgfrl1a/ilk/rap1aa/polr1d/tapt1b/sox6/runx3
GO:0006879	cellular iron ion homeostasis	5	0.111293	0.585897	0.535994	hpx/fth1b/hephl1a/abcb7/aco1
GO:0000209	protein polyubiquitination	12	0.111392	0.585897	0.535994	ube2g1b/rnf139/ube4b/ube2d1b/ube2g1a/ube2v2/rnf24/lonrf1/ube2s/ankib1a/si:ch211-284e13.9/ube2a
GO:0044283	small molecule biosynthetic process	36	0.112165	0.585897	0.535994	pmvk/gls2a/mlycd/cbsb/apoeb/impdh2/ctps1a/adkb/apoa4b.1/pgam1a/sephs1/cnp/uck2b/elovl4b/impdh1b/rdh10b/hsd17b3/nudt3a/asns/qtrt2/hprt1/fpgs/enoph1/aclya/g6pca.1/csad/upp1/pfklb/apoea/ppip5k1b/rfk/apoa4b.2/si:dkey-7f3.14/mgst2/gck/amd1
GO:0006415	translational termination	3	0.112281	0.585897	0.535994	etf1b/abce1/eif5a2
GO:0006536	glutamate metabolic process	3	0.112281	0.585897	0.535994	gls2a/aldh4a1/si:ch73-71d17.1
GO:0019217	regulation of fatty acid metabolic process	3	0.112281	0.585897	0.535994	apoa4b.1/apoa4b.2/si:dkey-7f3.14
GO:0021594	rhombomere formation	3	0.112281	0.585897	0.535994	notch3/epha4a/notch1b
GO:0032411	positive regulation of transporter activity	3	0.112281	0.585897	0.535994	park7/sgk2b/sgk3
GO:0034308	primary alcohol metabolic process	3	0.112281	0.585897	0.535994	aldh1a2/rdh10b/dhrs3b
GO:0044241	lipid digestion	3	0.112281	0.585897	0.535994	apoa4b.1/apoa4b.2/si:dkey-7f3.14
GO:0046164	alcohol catabolic process	3	0.112281	0.585897	0.535994	apoeb/apoea/miox
GO:1901796	regulation of signal transduction by p53 class mediator	3	0.112281	0.585897	0.535994	rnf2/bcor/smyd2a
GO:0009952	anterior/posterior pattern specification	24	0.112729	0.587022	0.537023	ctr9/cactin/aldh1a2/hdac1/cdh2/smad2/rap1b/rnf2/hes6/ncor1/chuk/calm1a/naa50/slc7a6os/myh10/smarca1/pnpla6/myh9b/agrn/creb1a/ctnnbip1/disp1/epha4a/atp1a1a.1
GO:0055086	nucleobase-containing small molecule metabolic process	41	0.115161	0.598459	0.547486	zgc:174895/nampta/ampd2a/npr2/tymp/prps1a/adssl/impdh2/ctps1a/adkb/pgam1a/cnp/uck2b/ampd3b/adsl/impdh1b/gmds/aprt/nudt3a/atp5mc3a/qtrt2/hprt1/flad1/park7/zgc:103559/upp1/pfklb/afmid/adss/gda/si:ch211-201h21.5/ugp2a/xdh/adcy6b/hrh3/aox6/ppat/gck/ndufaf7/pnp5a/amd1
GO:0010256	endomembrane system organization	15	0.115878	0.599416	0.548362	optn/aktip/tmem170a/gorasp2/tor1l3/baiap2l2a/golga5/cav2/golph3/nsfl1c/bmb/mtss1la/tor1/myo18aa/get4
GO:0009119	ribonucleoside metabolic process	9	0.116054	0.599416	0.548362	impdh2/ctps1a/adkb/uck2b/impdh1b/qtrt2/hprt1/upp1/amd1
GO:0048884	neuromast development	9	0.116054	0.599416	0.548362	aldh1l1/prox1a/stat3/setb/rtn4a/tnfrsf19/wnk1b/rtn4b/mgat5
GO:0010975	regulation of neuron projection development	14	0.117092	0.603548	0.552142	llph/ntn1a/apoeb/nrp1a/kctd12.1/rtn4ip1/ndel1a/rbpms2a/apoea/plxnb1a/sipa1l1/plxnb1b/epha4a/clstn1
GO:0000902	cell morphogenesis	52	0.117525	0.60455	0.553059	llph/mettl3/rilpl2/ssbp3a/gpc4/appb/sdc2/lamc1/ntn1a/cdh2/apoeb/anos1a/stat3/optn/cyfip1/nrp1a/mycbp2/kif1b/kctd12.1/ilk/uba1/stk24b/rbpms2a/rtn4a/cobl/elp3/brwd3/apoea/katna1/stk24a/myh10/plod3/srgap2/tnikb/gba2/pnpla6/plxnb1a/sema5a/myh9b/sipa1l1/agrn/mfn2/plxnb1b/notch3/disp1/epha4a/cdk5/rtn4b/clstn1/fryb/notch1b/ptprfb
GO:0060218	hematopoietic stem cell differentiation	10	0.117783	0.604652	0.553151	mettl3/jag1a/hdac1/tgfbr2b/wdr43/fgfr2/sf3a3/ncor2/lrsam1/supt5h
GO:0032787	monocarboxylic acid metabolic process	25	0.119286	0.611128	0.559076	ehhadh/mlycd/aldh1a2/apoa4b.1/pgam1a/elovl4b/hagh/rdh10b/cyp2k22/cyp2k18/asns/si:ch73-71d17.1/acot16/pdha1a/aclya/me3/acss1/pfklb/acot11a/acot18/apoa4b.2/si:dkey-7f3.14/acot17/gck/acsf2
GO:0008283	cell proliferation	44	0.119608	0.611543	0.559456	dia1b/npr2/cxcl8b.1/cxcl11.5/dlg1/hdac1/ptk2bb/id2a/pes/cx43/cdh2/elf1/stat3/gnl3/adgrg1/ppdpfa/fgfr2/tes/tnfrsf1a/junba/ing2/dusp22a/s100a10a/dlg1l/smyd2a/tmem127/si:ch211-260e23.9/csk/vegfab/ppp1r9ba/dab2ipb/sgk2b/trim71/abcb6a/sgk3/tnk1/hspg2/mfn2/frk/plcd3a/notch3/zgc:153631/rhbdf1a/igfbp2b
GO:0033365	protein localization to organelle	21	0.120341	0.614055	0.561753	cse1l/nup50/agk/vps36/kdelr2a/timm50/heatr3/srp54/klhl21/nup133/ipo9/ift20/pmpca/timm44/ipo4/tprb/grpel1/lrsam1/kpna1/sec61b/get4
GO:0009725	response to hormone	26	0.121018	0.614687	0.562332	esr1/nr2f5/rxrba/rarga/thrb/nr5a2/pparda/med14/nfe2l2a/stat5a/cyp2k22/baiap2l2a/adipor1b/junba/cd36/rab10/carm1/cnot1/nr1d1/sik1/rxraa/nr1h5/socs2/agrn/nr1i2/tsc2
GO:0001816	cytokine production	6	0.122291	0.614687	0.562332	mt2/pias4a/sars/csk/lgr4/mavs
GO:0007030	Golgi organization	6	0.122291	0.614687	0.562332	optn/gorasp2/golga5/golph3/nsfl1c/myo18aa
GO:0030917	midbrain-hindbrain boundary development	6	0.122291	0.614687	0.562332	calm1a/slc7a6os/myh10/myh9b/creb1a/atp1a1a.1
GO:1901214	regulation of neuron death	6	0.122291	0.614687	0.562332	hm13/apoeb/cpeb4a/park7/apoea/cdk5
GO:0045595	regulation of cell differentiation	44	0.122992	0.614687	0.562332	llph/mettl3/appb/hdac1/id2a/skia/ntn1a/cdh2/apoeb/smad2/stat3/gnl3/adgrg1/rnf2/parp3/fgfr2/nrp1a/prmt5/mdga2a/stat5a/kctd12.1/rtn4ip1/eftud2/ndel1a/junba/rbpms2a/tm4sf4/carm1/smyd5/smyd2a/apoea/srgap2/si:ch211-194k22.8/riox1/plxnb1a/sipa1l1/plxnb1b/notch3/runx3/epha4a/supt5h/mcrip1/clstn1/gnl2
GO:0003323	type B pancreatic cell development	4	0.123374	0.614687	0.562332	dhps/tm4sf4/ide/gck
GO:0010565	regulation of cellular ketone metabolic process	4	0.123374	0.614687	0.562332	apoa4b.1/apoa4b.2/si:dkey-7f3.14/slc7a7
GO:0017015	regulation of transforming growth factor beta receptor signaling pathway	4	0.123374	0.614687	0.562332	ppm1bb/skia/si:rp71-46j2.7/rlim
GO:0048813	dendrite morphogenesis	4	0.123374	0.614687	0.562332	sdc2/kctd12.1/rbpms2a/sipa1l1
GO:1901215	negative regulation of neuron death	4	0.123374	0.614687	0.562332	apoeb/cpeb4a/apoea/cdk5
GO:1903844	regulation of cellular response to transforming growth factor beta stimulus	4	0.123374	0.614687	0.562332	ppm1bb/skia/si:rp71-46j2.7/rlim
GO:0008643	carbohydrate transport	5	0.124803	0.619377	0.566622	mfsd4b/akt2/slc37a2/slc23a1/slc2a13b
GO:0046677	response to antibiotic	5	0.124803	0.619377	0.566622	cry1aa/ache/per2/park7/per1a
GO:0048565	digestive tract development	12	0.12592	0.623699	0.570576	aldh1a2/hdac1/sdc2/diexf/fgfr2/rbm19/fgfrl1a/ppm1k/polr3b/myo5b/tsc2/cldn15a
GO:0009314	response to radiation	18	0.128039	0.632959	0.579048	cry1aa/mettl3/cdkn1a/per2/msh6/lamc1/tefa/xrcc6/uvssa/per1b/junba/nabp1a/perp/tefb/ints3/per1a/cry2/cry5
GO:0021782	glial cell development	7	0.12873	0.633902	0.579911	aldh1a2/foxa2/adgrg1/leo1/adcy6b/notch3/slc7a7
GO:0046165	alcohol biosynthetic process	7	0.12873	0.633902	0.579911	pmvk/apoeb/apoa4b.1/apoea/ppip5k1b/apoa4b.2/si:dkey-7f3.14
GO:0007160	cell-matrix adhesion	8	0.132363	0.641719	0.587061	si:dkey-71b5.7/ilk/myoc/itgb1a/epdl2/itgb2/myo18aa/itgb7
GO:0032101	regulation of response to external stimulus	16	0.133026	0.641719	0.587061	si:ch211-153b23.7/cxcl8b.1/cxcl11.5/ptk2bb/serpinc1/setd6/cnbpa/nrp1a/arrb2b/tnfrsf1a/rbpms2a/vegfab/lrsam1/caspa/epha4a/ghrl
GO:0015749	monosaccharide transmembrane transport	3	0.133524	0.641719	0.587061	akt2/slc23a1/slc2a13b
GO:0030512	negative regulation of transforming growth factor beta receptor signaling pathway	3	0.133524	0.641719	0.587061	ppm1bb/skia/si:rp71-46j2.7
GO:0046112	nucleobase biosynthetic process	3	0.133524	0.641719	0.587061	zgc:174895/aprt/ppat
GO:0048859	formation of anatomical boundary	3	0.133524	0.641719	0.587061	notch3/epha4a/notch1b
GO:0055083	monovalent inorganic anion homeostasis	3	0.133524	0.641719	0.587061	calca/enpp1/slc34a2a
GO:0060193	positive regulation of lipase activity	3	0.133524	0.641719	0.587061	apoa4b.1/apoa4b.2/si:dkey-7f3.14
GO:0070167	regulation of biomineral tissue development	3	0.133524	0.641719	0.587061	ptk2bb/enpp1/ahsg2
GO:1903845	negative regulation of cellular response to transforming growth factor beta stimulus	3	0.133524	0.641719	0.587061	ppm1bb/skia/si:rp71-46j2.7
GO:0031098	stress-activated protein kinase signaling cascade	12	0.133563	0.641719	0.587061	stk3/adgrg1/oxsr1b/stk24b/dusp22a/stk24a/tnikb/tnfrsf19/map3k21/map2k6/map4k2/map4k6
GO:0051270	regulation of cellular component movement	20	0.133971	0.641719	0.587061	mt2/aldh1l1/cxcl8b.1/cxcl11.5/zeb1b/gpc4/ptk2bb/prox1a/gnb1a/nrp1a/mdga2a/arrb2b/cnn2/rbpms2a/rtn4a/myoc/srgap2/vegfab/tnfrsf19/sst2
GO:0072522	purine-containing compound biosynthetic process	20	0.133971	0.641719	0.587061	zgc:174895/ampd2a/npr2/adssl/impdh2/adkb/pgam1a/ampd3b/adsl/impdh1b/aprt/atp5mc3a/hprt1/pfklb/adss/adcy6b/hrh3/ppat/gck/amd1
GO:0001755	neural crest cell migration	9	0.13417	0.641719	0.587061	aldh1l1/cdh2/nrp1a/rcc2/glrx2/plod3/fscn1a/med13b/foxc1b
GO:0010769	regulation of cell morphogenesis involved in differentiation	11	0.134458	0.641719	0.587061	ntn1a/apoeb/nrp1a/kctd12.1/rbpms2a/apoea/plxnb1a/sipa1l1/plxnb1b/epha4a/clstn1
GO:0001764	neuron migration	6	0.134531	0.641719	0.587061	met/hdac1/cdh2/mdga2a/srgap2/supt5h
GO:0007409	axonogenesis	35	0.134619	0.641719	0.587061	ssbp3a/appb/lamc1/ntn1a/cdh2/apoeb/anos1a/stat3/optn/cyfip1/nrp1a/mycbp2/kif1b/uba1/rbpms2a/rtn4a/elp3/apoea/katna1/plod3/gba2/pnpla6/plxnb1a/sema5a/agrn/mfn2/plxnb1b/notch3/disp1/epha4a/cdk5/rtn4b/clstn1/notch1b/ptprfb
GO:0009108	coenzyme biosynthetic process	15	0.135399	0.644227	0.589356	nampta/pgam1a/elovl4b/pdha1a/fpgs/aclya/flad1/tpk1/acss1/pfklb/afmid/mat2al/gck/mat2ab/mocs1
GO:0051336	regulation of hydrolase activity	27	0.136542	0.648448	0.593217	iqgap1/arhgap35a/dnmbp/bcl2l1/apoa4b.1/xiap/ndel1a/rabif/rabgap1l/dab2ipb/ralgapb/myo9b/plxnb1a/dync1i2b/sipa1l1/iqgap2/rasa1b/zgc:158852/tsc2/tiam1a/plxnb1b/apoa4b.2/si:dkey-7f3.14/chn2/si:dkey-238d18.4/rasal3/apopt1
GO:0042737	drug catabolic process	5	0.139027	0.656737	0.600801	npl/ache/chia.3/zgc:103559/sat1b
GO:0043122	regulation of I-kappaB kinase/NF-kappaB signaling	5	0.139027	0.656737	0.600801	si:ch211-153b23.7/ndfip1/optn/chuk/tnfrsf19
GO:0006352	DNA-templated transcription, initiation	7	0.139924	0.656737	0.600801	psmc6/brf1a/gtf2e2/gtf2f2a/polr3h/polr2i/tfb2m
GO:0016573	histone acetylation	7	0.139924	0.656737	0.600801	ruvbl1/naa50/kat5b/ep300b/crebbpa/crebbpb/noc2l
GO:0016999	antibiotic metabolic process	7	0.139924	0.656737	0.600801	npl/mdh1ab/mpx/si:ch73-71d17.1/mdh2/aclya/acss1
GO:0061053	somite development	18	0.140125	0.656737	0.600801	ctr9/copb2/aldh1a2/lamc1/cdh2/rap1b/snu13b/nono/smarcd1/copb1/hes6/chuk/naa50/rtn4a/slc7a6os/creb1a/notch3/epha4a
GO:0002068	glandular epithelial cell development	4	0.140359	0.656737	0.600801	dhps/tm4sf4/ide/gck
GO:0032007	negative regulation of TOR signaling	4	0.140359	0.656737	0.600801	mapkapk5/tmem127/depdc5/tsc2
GO:0010038	response to metal ion	8	0.142682	0.664671	0.608058	mt2/cygb1/tap2a/slc30a1a/sumo1/hvcn1/hsp70l/aco1
GO:0015849	organic acid transport	11	0.142841	0.664671	0.608058	slc7a8a/slc16a1b/slc43a2a/pla2g12a/slc38a7/slc51a/slc23a1/slc38a2/slc16a4/slc16a7/slc16a9a
GO:0046942	carboxylic acid transport	11	0.142841	0.664671	0.608058	slc7a8a/slc16a1b/slc43a2a/pla2g12a/slc38a7/slc51a/slc23a1/slc38a2/slc16a4/slc16a7/slc16a9a
GO:0051093	negative regulation of developmental process	17	0.143226	0.665238	0.608577	fdx1/per2/skia/ntn1a/ncln/hif1an/tm4sf4/sars/smyd5/srgap2/dab2ipb/riox1/fbxw7/ahsg2/notch3/epha4a/igfbp2b
GO:0035051	cardiocyte differentiation	9	0.143749	0.666448	0.609684	cdh2/prox1a/ilk/rbfox1l/glrx2/tln1/smarcd3b/plekha7a/atp1a1a.1
GO:0045446	endothelial cell differentiation	6	0.147324	0.679298	0.62144	mettl3/prox1a/ilk/tnfrsf19/adgra2/notch3
GO:0051017	actin filament bundle assembly	6	0.147324	0.679298	0.62144	pls1/eps8a/baiap2l2a/myoc/fscn1a/limk1a
GO:1902115	regulation of organelle assembly	6	0.147324	0.679298	0.62144	atxn2l/zgc:56235/cnot1/smyd2a/tapt1b/lrsam1
GO:0046916	cellular transition metal ion homeostasis	7	0.15157	0.692918	0.6339	hpx/slc30a1a/fth1b/slc30a9/hephl1a/abcb7/aco1
GO:0040012	regulation of locomotion	20	0.151608	0.692918	0.6339	mt2/aldh1l1/cxcl8b.1/cxcl11.5/zeb1b/gpc4/ptk2bb/prox1a/gnb1a/nrp1a/mdga2a/arrb2b/cnn2/rbpms2a/rtn4a/myoc/srgap2/vegfab/tnfrsf19/sst2
GO:0006333	chromatin assembly or disassembly	10	0.152922	0.692918	0.6339	h1f0/setb/rbbp4/anp32b/h1fx/seta/nap1l4a/hp1bp3/supt16h/bahcc1b
GO:0006694	steroid biosynthetic process	8	0.153387	0.692918	0.6339	pmvk/apoeb/apoa4b.1/hsd3b7/hsd17b3/apoea/apoa4b.2/si:dkey-7f3.14
GO:0048916	posterior lateral line development	8	0.153387	0.692918	0.6339	esr1/anos1a/stat3/gnb1a/hdac3/rtn4a/tnfrsf19/wnk1b
GO:0048915	posterior lateral line system development	9	0.153663	0.692918	0.6339	esr1/anos1a/stat3/gnb1a/kif1b/hdac3/rtn4a/tnfrsf19/wnk1b
GO:0000422	autophagy of mitochondrion	5	0.153923	0.692918	0.6339	atg9a/map1lc3b/atg3/pink1/fundc2
GO:0007006	mitochondrial membrane organization	5	0.153923	0.692918	0.6339	si:dkey-251i10.1/bnip3la/rhot1a/agk/timm50
GO:0045766	positive regulation of angiogenesis	5	0.153923	0.692918	0.6339	mt2/nrp1a/elmo1/vegfab/mep1a.2
GO:0061726	mitochondrion disassembly	5	0.153923	0.692918	0.6339	atg9a/map1lc3b/atg3/pink1/fundc2
GO:0006303	double-strand break repair via nonhomologous end joining	3	0.156016	0.692918	0.6339	xrcc6/prkdc/lig3
GO:0007568	aging	3	0.156016	0.692918	0.6339	apoda.2/lmna/ing2
GO:0010458	exit from mitosis	3	0.156016	0.692918	0.6339	gnl3/ube2s/gnl2
GO:0020027	hemoglobin metabolic process	3	0.156016	0.692918	0.6339	eif1axb/rpl11/glrx3
GO:0030150	protein import into mitochondrial matrix	3	0.156016	0.692918	0.6339	timm50/timm44/grpel1
GO:0030518	intracellular steroid hormone receptor signaling pathway	3	0.156016	0.692918	0.6339	med14/carm1/cnot1
GO:0030947	regulation of vascular endothelial growth factor receptor signaling pathway	3	0.156016	0.692918	0.6339	nrp1a/hif1an/dab2ipb
GO:0045926	negative regulation of growth	3	0.156016	0.692918	0.6339	osgn1/epha4a/igfbp2b
GO:0060191	regulation of lipase activity	3	0.156016	0.692918	0.6339	apoa4b.1/apoa4b.2/si:dkey-7f3.14
GO:0098781	ncRNA transcription	3	0.156016	0.692918	0.6339	rpap2/polr3b/ncl
GO:2001243	negative regulation of intrinsic apoptotic signaling pathway	3	0.156016	0.692918	0.6339	bcl2l1/rnf2/bcor
GO:0009165	nucleotide biosynthetic process	23	0.15721	0.69656	0.637232	nampta/ampd2a/npr2/prps1a/adssl/impdh2/ctps1a/pgam1a/uck2b/ampd3b/adsl/impdh1b/atp5mc3a/hprt1/flad1/upp1/pfklb/afmid/adss/adcy6b/hrh3/ppat/gck
GO:0030041	actin filament polymerization	12	0.157965	0.69656	0.637232	gsna/pfn2l/vil1/eps8a/baiap2l2a/pfn2/twf1b/cobl/arpc5lb/hcls1/ttc17/pfn1
GO:0006891	intra-Golgi vesicle-mediated transport	4	0.158209	0.69656	0.637232	copb2/copb1/rab41/golga5
GO:0016525	negative regulation of angiogenesis	4	0.158209	0.69656	0.637232	per2/ntn1a/sars/dab2ipb
GO:0016575	histone deacetylation	4	0.158209	0.69656	0.637232	hdac1/hdac3/tbl1xr1a/sin3aa
GO:0050790	regulation of catalytic activity	47	0.15932	0.700235	0.640593	oaz2a/iqgap1/arhgap35a/dnmbp/bcl2l1/dcun1d2a/oaz1a/apoeb/ccnt2b/apoa4b.1/stk3/dcun1d1/xiap/aph1b/oxsr1b/ndel1a/trib3/rabif/si:ch73-40i7.5/pkig/apoea/rabgap1l/dab2ipb/ralgapb/myo9b/plxnb1a/map3k21/dync1i2b/hrh3/shc2/sipa1l1/iqgap2/rasa1b/zgc:158852/ube2s/tsc2/tiam1a/dcp1b/ecsit/plxnb1b/apoa4b.2/si:dkey-7f3.14/chn2/map2k6/si:dkey-238d18.4/rasal3/apopt1
GO:0090101	negative regulation of transmembrane receptor protein serine/threonine kinase signaling pathway	6	0.160642	0.704825	0.644792	ppm1bb/skia/ncln/si:rp71-46j2.7/igfbp3/pnpla6
GO:0014070	response to organic cyclic compound	19	0.161903	0.70913	0.648731	mettl3/cyp1a/esr1/nr2f5/rxrba/rarga/thrb/nr5a2/pparda/eif1axb/med14/cyp2k22/junba/carm1/cnot1/nr1d1/rxraa/nr1h5/nr1i2
GO:0030855	epithelial cell differentiation	23	0.16299	0.710645	0.650117	mettl3/rilpl2/kdf1b/aldh1a2/cdh2/prox1a/nr5a2/stat3/glcci1a/psmd6/ilk/dhps/tm4sf4/rtn4a/cobl/tnfrsf19/adgra2/ide/iqgap2/tsc2/notch3/mgat5/gck
GO:0003158	endothelium development	7	0.16365	0.710645	0.650117	mettl3/prox1a/ilk/tnfrsf19/adgra2/notch3/sh3kbp1
GO:0018393	internal peptidyl-lysine acetylation	7	0.16365	0.710645	0.650117	ruvbl1/naa50/kat5b/ep300b/crebbpa/crebbpb/noc2l
GO:0018394	peptidyl-lysine acetylation	7	0.16365	0.710645	0.650117	ruvbl1/naa50/kat5b/ep300b/crebbpa/crebbpb/noc2l
GO:0021532	neural tube patterning	7	0.16365	0.710645	0.650117	hdac1/calm1a/slc7a6os/myh10/myh9b/creb1a/atp1a1a.1
GO:0007264	small GTPase mediated signal transduction	33	0.164894	0.714823	0.653939	dnmbp/arhgef5/si:dkey-166d12.2/rock2a/gdi2/rhoq/rhogb/itsn1/rgl1/mapkapk5/rabif/rhoua/sos1/vav2/dab2ipb/ralgapb/psd3l/rap1gap2a/sipa1l1/si:ch1073-13h15.3/zgc:172079/rasa1b/tsc2/tiam1a/plce1/ngef/arhgap33/chn2/lpar6a/rnd2/iqsec2b/rasal3/si:ch211-251j10.3
GO:0022603	regulation of anatomical structure morphogenesis	35	0.165235	0.715078	0.654173	fdx1/mt2/zeb1b/per2/flot2a/ptk2bb/id2a/ntn1a/cdh2/apoeb/stat3/rock2a/parp3/cyfip1/nrp1a/kctd12.1/elmo1/rbpms2a/sars/pink1/smyd2a/brwd3/apoea/myh10/vegfab/dab2ipb/sec14l8/plxnb1a/myh9b/sipa1l1/mief1/mep1a.2/plxnb1b/epha4a/clstn1
GO:0051186	cofactor metabolic process	28	0.167854	0.725173	0.663408	pmvk/nampta/aldh1l1/pgam1a/elovl4b/mpx/slc25a39/ndor1/acot16/pdha1a/fpgs/aclya/flad1/tpk1/gsto2/acss1/pfklb/afmid/gsr/acot11a/acot18/ggt5a/acot17/mat2al/gck/hmox1a/mat2ab/mocs1
GO:1901293	nucleoside phosphate biosynthetic process	23	0.168885	0.728389	0.66635	nampta/ampd2a/npr2/prps1a/adssl/impdh2/ctps1a/pgam1a/uck2b/ampd3b/adsl/impdh1b/atp5mc3a/hprt1/flad1/upp1/pfklb/afmid/adss/adcy6b/hrh3/ppat/gck
GO:0006626	protein targeting to mitochondrion	5	0.169444	0.72956	0.66742	agk/timm50/pmpca/timm44/grpel1
GO:0045765	regulation of angiogenesis	10	0.17226	0.740425	0.67736	mt2/per2/ptk2bb/ntn1a/nrp1a/elmo1/sars/vegfab/dab2ipb/mep1a.2
GO:0006997	nucleus organization	6	0.174456	0.746535	0.68295	tor1l3/nup133/nsfl1c/psme4b/bmb/tor1
GO:0007249	I-kappaB kinase/NF-kappaB signaling	6	0.174456	0.746535	0.68295	si:ch211-153b23.7/ndfip1/optn/chuk/tnfrsf19/relb
GO:0006475	internal protein amino acid acetylation	7	0.176144	0.746535	0.68295	ruvbl1/naa50/kat5b/ep300b/crebbpa/crebbpb/noc2l
GO:0051090	regulation of DNA binding transcription factor activity	7	0.176144	0.746535	0.68295	prox1a/setd6/adgrg1/chuk/cops5/crebzf/relb
GO:0006367	transcription initiation from RNA polymerase II promoter	4	0.176839	0.746535	0.68295	psmc6/gtf2e2/gtf2f2a/polr2i
GO:0006998	nuclear envelope organization	4	0.176839	0.746535	0.68295	tor1l3/nsfl1c/bmb/tor1
GO:0031532	actin cytoskeleton reorganization	4	0.176839	0.746535	0.68295	ptk2bb/baiap2l2a/sipa1l1/fryb
GO:2000181	negative regulation of blood vessel morphogenesis	4	0.176839	0.746535	0.68295	per2/ntn1a/sars/dab2ipb
GO:0002028	regulation of sodium ion transport	3	0.179569	0.746535	0.68295	nkain1/fxyd6l/klhl24a
GO:0002097	tRNA wobble base modification	3	0.179569	0.746535	0.68295	nat10/ctu2/elp2
GO:0007064	mitotic sister chromatid cohesion	3	0.179569	0.746535	0.68295	naa50/dscc1/pds5b
GO:0010043	response to zinc ion	3	0.179569	0.746535	0.68295	mt2/slc30a1a/hvcn1
GO:0016180	snRNA processing	3	0.179569	0.746535	0.68295	exosc4/exosc2/ints1
GO:0034219	carbohydrate transmembrane transport	3	0.179569	0.746535	0.68295	akt2/slc23a1/slc2a13b
GO:0045746	negative regulation of Notch signaling pathway	3	0.179569	0.746535	0.68295	mettl3/si:ch211-194k22.8/fbxw7
GO:0046330	positive regulation of JNK cascade	3	0.179569	0.746535	0.68295	dusp22a/tnfrsf19/map3k21
GO:0051222	positive regulation of protein transport	3	0.179569	0.746535	0.68295	oaz1a/mief1/cnsta
GO:0071526	semaphorin-plexin signaling pathway	3	0.179569	0.746535	0.68295	nrp1a/plxnb1a/plxnb1b
GO:1901616	organic hydroxy compound catabolic process	3	0.179569	0.746535	0.68295	apoeb/apoea/miox
GO:1904951	positive regulation of establishment of protein localization	3	0.179569	0.746535	0.68295	oaz1a/mief1/cnsta
GO:0048881	mechanosensory lateral line system development	9	0.185311	0.763861	0.698801	esr1/anos1a/stat3/gnb1a/kif1b/hdac3/rtn4a/tnfrsf19/wnk1b
GO:0002685	regulation of leukocyte migration	5	0.185544	0.763861	0.698801	cxcl8b.1/cxcl11.5/ptk2bb/gnb1a/vegfab
GO:0060348	bone development	5	0.185544	0.763861	0.698801	cx43/rap1b/akt2/rap1aa/tapt1b
GO:0070585	protein localization to mitochondrion	5	0.185544	0.763861	0.698801	agk/timm50/pmpca/timm44/grpel1
GO:0072593	reactive oxygen species metabolic process	5	0.185544	0.763861	0.698801	mpx/ncf1/park7/pink1/nox1
GO:0072655	establishment of protein localization to mitochondrion	5	0.185544	0.763861	0.698801	agk/timm50/pmpca/timm44/grpel1
GO:0006814	sodium ion transport	11	0.188649	0.770705	0.705061	mfsd4b/slc13a1/nkain1/slc13a3/slc13a2/slc38a7/fxyd6l/slc38a2/atp1a1a.1/atp1a1a.4/klhl24a
GO:0001101	response to acid chemical	6	0.188735	0.770705	0.705061	ache/nr2f5/nfe2l2a/cpeb4a/cd36/rragca
GO:0009260	ribonucleotide biosynthetic process	19	0.189026	0.770705	0.705061	ampd2a/npr2/adssl/impdh2/ctps1a/pgam1a/uck2b/ampd3b/adsl/impdh1b/atp5mc3a/hprt1/upp1/pfklb/adss/adcy6b/hrh3/ppat/gck
GO:0046390	ribose phosphate biosynthetic process	19	0.189026	0.770705	0.705061	ampd2a/npr2/adssl/impdh2/ctps1a/pgam1a/uck2b/ampd3b/adsl/impdh1b/atp5mc3a/hprt1/upp1/pfklb/adss/adcy6b/hrh3/ppat/gck
GO:0050920	regulation of chemotaxis	7	0.189029	0.770705	0.705061	cxcl8b.1/cxcl11.5/ptk2bb/nrp1a/arrb2b/rbpms2a/vegfab
GO:0055113	epiboly involved in gastrulation with mouth forming second	7	0.189029	0.770705	0.705061	fdx1/flot2a/sdc2/chuk/sec14l8/dsc2l/pfn1
GO:0042127	regulation of cell proliferation	32	0.189934	0.773152	0.7073	cxcl8b.1/cxcl11.5/hdac1/ptk2bb/id2a/cdh2/stat3/gnl3/adgrg1/fgfr2/tes/tnfrsf1a/junba/ing2/dusp22a/s100a10a/smyd2a/tmem127/si:ch211-260e23.9/csk/vegfab/ppp1r9ba/dab2ipb/sgk2b/trim71/sgk3/tnk1/mfn2/frk/plcd3a/zgc:153631/igfbp2b
GO:0002520	immune system development	49	0.194629	0.786697	0.719691	mettl3/tle3b/jag1a/hdac1/msh6/npm1a/cx43/max/tgfbr2b/wdr43/ddx18/eif1axb/smarcd1/brf1a/abcc5/nap1l4a/fgfr2/nrp1a/kif1b/stat5a/hspa9/ncor1/cdc73/etnppl/gar1/kri1/smarcc1a/sumo3a/sumo1/zfpm1/rpl11/sf3a3/smyd5/pink1/smarca1/hsp70l/ncor2/lrsam1/prkdc/crebbpa/mfn2/notch3/smad3a/runx3/dkc1/slc7a7/supt5h/notch1b/gemin5
GO:0048732	gland development	25	0.194736	0.786697	0.719691	met/bcl2l1/aldh1a2/jag1a/hdac1/id2a/diexf/ntn1a/pes/rarga/nr5a2/ppdpfa/fgfr2/nrp1a/hdac3/prkcsh/dhps/pnpla3/ppm1k/bms1/polr3b/supv3l1/notch3/disp1/kdrl
GO:0030837	negative regulation of actin filament polymerization	4	0.196162	0.786697	0.719691	gsna/vil1/eps8a/twf1b
GO:0032272	negative regulation of protein polymerization	4	0.196162	0.786697	0.719691	gsna/vil1/eps8a/twf1b
GO:0034599	cellular response to oxidative stress	4	0.196162	0.786697	0.719691	nfe2l2a/txnl1/park7/lonp1
GO:0030097	hemopoiesis	47	0.19626	0.786697	0.719691	mettl3/tle3b/jag1a/hdac1/npm1a/cx43/max/tgfbr2b/wdr43/ddx18/eif1axb/smarcd1/brf1a/abcc5/nap1l4a/fgfr2/kif1b/stat5a/hspa9/ncor1/cdc73/etnppl/gar1/kri1/smarcc1a/sumo3a/sumo1/zfpm1/rpl11/sf3a3/smyd5/pink1/smarca1/hsp70l/ncor2/lrsam1/prkdc/crebbpa/mfn2/notch3/smad3a/runx3/dkc1/slc7a7/supt5h/notch1b/gemin5
GO:0001944	vasculature development	51	0.197105	0.786697	0.719691	mettl3/cdkn1a/mt2/per2/appb/ptk2bb/sdc2/ntn1a/prox1a/ephb4a/tie1/wdr43/kdm4ab/fbxw11a/cul2/med14/nrp1a/hif1an/ilk/hdac3/elmo1/junba/glrx2/eef2k/sars/rtn4a/rab11a/perp/ism1/vegfab/dab2ipb/tnfrsf19/hsp70l/adgra2/wnk1b/nrxn3a/fbxw7/phkg1a/hspg2/mep1a.2/lrp1ab/sat1b/plcd3a/lpar6a/notch3/sh3kbp1/foxc1b/notch1b/kdrl/apln/rnasel3
GO:0051056	regulation of small GTPase mediated signal transduction	20	0.19745	0.786697	0.719691	dnmbp/arhgef5/si:dkey-166d12.2/itsn1/sos1/vav2/dab2ipb/ralgapb/psd3l/rap1gap2a/sipa1l1/zgc:172079/rasa1b/tsc2/tiam1a/ngef/chn2/lpar6a/iqsec2b/rasal3
GO:0120035	regulation of plasma membrane bounded cell projection organization	16	0.19822	0.786697	0.719691	llph/ntn1a/apoeb/nrp1a/kctd12.1/zgc:56235/rtn4ip1/ndel1a/rbpms2a/apoea/tapt1b/plxnb1a/sipa1l1/plxnb1b/epha4a/clstn1
GO:0001702	gastrulation with mouth forming second	8	0.199764	0.786697	0.719691	fdx1/gpc4/flot2a/sdc2/chuk/sec14l8/dsc2l/pfn1
GO:0006888	ER to Golgi vesicle-mediated transport	8	0.199764	0.786697	0.719691	copb2/sec22ba/scfd1/copb1/trappc4/sec16b/lman1/nrbp2b
GO:0031589	cell-substrate adhesion	8	0.199764	0.786697	0.719691	si:dkey-71b5.7/ilk/myoc/itgb1a/epdl2/itgb2/myo18aa/itgb7
GO:0006730	one-carbon metabolic process	5	0.20217	0.786697	0.719691	mthfd2/aldh1l1/fpgs/mat2al/mat2ab
GO:0065002	intracellular protein transmembrane transport	5	0.20217	0.786697	0.719691	agk/timm50/timm44/grpel1/sec61b
GO:0071806	protein transmembrane transport	5	0.20217	0.786697	0.719691	agk/timm50/timm44/grpel1/sec61b
GO:1904018	positive regulation of vasculature development	5	0.20217	0.786697	0.719691	mt2/nrp1a/elmo1/vegfab/mep1a.2
GO:0051223	regulation of protein transport	7	0.202283	0.786697	0.719691	oaz1a/ndfip1/lgr4/mief1/cnsta/gck/rhbdf1a
GO:0070201	regulation of establishment of protein localization	7	0.202283	0.786697	0.719691	oaz1a/ndfip1/lgr4/mief1/cnsta/gck/rhbdf1a
GO:0090087	regulation of peptide transport	7	0.202283	0.786697	0.719691	oaz1a/ndfip1/lgr4/mief1/cnsta/gck/rhbdf1a
GO:0015718	monocarboxylic acid transport	6	0.203445	0.786697	0.719691	slc16a1b/pla2g12a/slc51a/slc16a4/slc16a7/slc16a9a
GO:0048483	autonomic nervous system development	6	0.203445	0.786697	0.719691	diexf/ncln/mdga2a/gmds/fscn1a/rtn4b
GO:0050673	epithelial cell proliferation	6	0.203445	0.786697	0.719691	dlg1/hdac1/dlg1l/vegfab/abcb6a/hspg2
GO:0000726	non-recombinational repair	3	0.203997	0.786697	0.719691	xrcc6/prkdc/lig3
GO:0001885	endothelial cell development	3	0.203997	0.786697	0.719691	ilk/tnfrsf19/adgra2
GO:0002690	positive regulation of leukocyte chemotaxis	3	0.203997	0.786697	0.719691	cxcl8b.1/cxcl11.5/vegfab
GO:0003231	cardiac ventricle development	3	0.203997	0.786697	0.719691	smarca5/ilk/ltbp3
GO:0006275	regulation of DNA replication	3	0.203997	0.786697	0.719691	dscc1/lonp1/igfbp2b
GO:0006893	Golgi to plasma membrane transport	3	0.203997	0.786697	0.719691	golph3/exoc4/cnsta
GO:0021554	optic nerve development	3	0.203997	0.786697	0.719691	rtn4a/cdk5/rtn4b
GO:0030225	macrophage differentiation	3	0.203997	0.786697	0.719691	kif1b/ncor2/slc7a7
GO:0051092	positive regulation of NF-kappaB transcription factor activity	3	0.203997	0.786697	0.719691	adgrg1/chuk/relb
GO:0051153	regulation of striated muscle cell differentiation	3	0.203997	0.786697	0.719691	prmt5/carm1/smyd2a
GO:0051438	regulation of ubiquitin-protein transferase activity	3	0.203997	0.786697	0.719691	dcun1d2a/dcun1d1/ube2s
GO:0071542	dopaminergic neuron differentiation	3	0.203997	0.786697	0.719691	anos1a/per1b/pink1
GO:0048534	hematopoietic or lymphoid organ development	48	0.204119	0.786697	0.719691	mettl3/tle3b/jag1a/hdac1/npm1a/cx43/max/tgfbr2b/wdr43/ddx18/eif1axb/smarcd1/brf1a/abcc5/nap1l4a/fgfr2/nrp1a/kif1b/stat5a/hspa9/ncor1/cdc73/etnppl/gar1/kri1/smarcc1a/sumo3a/sumo1/zfpm1/rpl11/sf3a3/smyd5/pink1/smarca1/hsp70l/ncor2/lrsam1/prkdc/crebbpa/mfn2/notch3/smad3a/runx3/dkc1/slc7a7/supt5h/notch1b/gemin5
GO:0031101	fin regeneration	9	0.207877	0.797494	0.729568	aldh1a2/hdac1/cx43/scfd1/rbbp4/hspa9/tnfrsf1a/mtrex/notch1b
GO:0031497	chromatin assembly	9	0.207877	0.797494	0.729568	h1f0/setb/rbbp4/anp32b/h1fx/seta/nap1l4a/hp1bp3/bahcc1b
GO:0051241	negative regulation of multicellular organismal process	17	0.208104	0.797494	0.729568	fdx1/per2/ntn1a/ncln/hif1an/pias4a/tm4sf4/sars/smyd5/srgap2/dab2ipb/lgr4/riox1/fbxw7/ahsg2/notch3/epha4a
GO:0009628	response to abiotic stimulus	33	0.211053	0.797494	0.729568	cry1aa/mettl3/cdkn1a/per2/msh6/lamc1/ldha/tefa/xrcc6/dnaja3a/nrp1a/cpeb4a/uvssa/per1b/sumo1/lipf/junba/hvcn1/trpa1a/nabp1a/perp/tefb/vegfab/hsp70l/ints3/bhlhe41/per1a/slc26a3.1/hmox1a/apln/nupr1b/cry2/cry5
GO:0043062	extracellular structure organization	10	0.214117	0.797494	0.729568	gpc4/apoeb/apoa4b.1/fbln2/apoea/ctss2.1/plce1/apoa4b.2/si:dkey-7f3.14/atp1a1a.1
GO:0031344	regulation of cell projection organization	16	0.214475	0.797494	0.729568	llph/ntn1a/apoeb/nrp1a/kctd12.1/zgc:56235/rtn4ip1/ndel1a/rbpms2a/apoea/tapt1b/plxnb1a/sipa1l1/plxnb1b/epha4a/clstn1
GO:0051216	cartilage development	16	0.214475	0.797494	0.729568	gpc4/skia/cdh2/nr5a2/scfd1/rap1b/cnbpa/rnf2/aldh7a1/dcaf7/nrp1a/fgfrl1a/rap1aa/polr1d/tapt1b/runx3
GO:0030522	intracellular receptor signaling pathway	7	0.215882	0.797494	0.729568	aldh1a2/rarga/thrb/med14/carm1/cnot1/mavs
GO:0002218	activation of innate immune response	4	0.21609	0.797494	0.729568	unc93b1/si:ch211-153b23.7/lgr4/mavs
GO:0002221	pattern recognition receptor signaling pathway	4	0.21609	0.797494	0.729568	unc93b1/si:ch211-153b23.7/lgr4/mavs
GO:0002758	innate immune response-activating signal transduction	4	0.21609	0.797494	0.729568	unc93b1/si:ch211-153b23.7/lgr4/mavs
GO:0006406	mRNA export from nucleus	4	0.21609	0.797494	0.729568	ddx39aa/ddx39ab/thoc3/rbmx2
GO:0006476	protein deacetylation	4	0.21609	0.797494	0.729568	hdac1/hdac3/tbl1xr1a/sin3aa
GO:0061138	morphogenesis of a branching epithelium	4	0.21609	0.797494	0.729568	aldh1a2/ntn1a/sars/ctnnbip1
GO:0071427	mRNA-containing ribonucleoprotein complex export from nucleus	4	0.21609	0.797494	0.729568	ddx39aa/ddx39ab/thoc3/rbmx2
GO:0003401	axis elongation	6	0.218553	0.797494	0.729568	gpc4/hdac1/cdh2/stat3/sec14l8/creb1a
GO:0018107	peptidyl-threonine phosphorylation	6	0.218553	0.797494	0.729568	camk1ga/phkg2/phkg1b/camk2b1/phkg1a/camk2g1
GO:0018210	peptidyl-threonine modification	6	0.218553	0.797494	0.729568	camk1ga/phkg2/phkg1b/camk2b1/phkg1a/camk2g1
GO:0042278	purine nucleoside metabolic process	6	0.218553	0.797494	0.729568	impdh2/adkb/impdh1b/hprt1/si:ch211-201h21.5/amd1
GO:0022411	cellular component disassembly	14	0.21899	0.797494	0.729568	endog/atg9a/etf1b/gsna/map1lc3b/napab/atg3/vil1/eps8a/abce1/eif5a2/pink1/ctss2.1/fundc2
GO:0030336	negative regulation of cell migration	5	0.219272	0.797494	0.729568	aldh1l1/prox1a/rtn4a/srgap2/tnfrsf19
GO:0050727	regulation of inflammatory response	5	0.219272	0.797494	0.729568	si:ch211-153b23.7/setd6/cnbpa/tnfrsf1a/caspa
GO:0061351	neural precursor cell proliferation	5	0.219272	0.797494	0.729568	cdh2/adgrg1/fgfr2/trim71/notch3
GO:0050770	regulation of axonogenesis	9	0.219558	0.797494	0.729568	ntn1a/apoeb/nrp1a/rbpms2a/apoea/plxnb1a/plxnb1b/epha4a/clstn1
GO:0006914	autophagy	15	0.221132	0.797494	0.729568	atg9a/map1lc3b/optn/atg3/zgc:63831/atg13/park7/nsfl1c/pink1/nr1d1/si:ch211-260e23.9/lrsam1/depdc5/rragca/fundc2
GO:0061919	process utilizing autophagic mechanism	15	0.221132	0.797494	0.729568	atg9a/map1lc3b/optn/atg3/zgc:63831/atg13/park7/nsfl1c/pink1/nr1d1/si:ch211-260e23.9/lrsam1/depdc5/rragca/fundc2
GO:0030029	actin filament-based process	40	0.221218	0.797494	0.729568	dlg1/ache/ptk2bb/prox1a/rock2a/gsna/pfn2l/coro2a/pls1/vil1/eps8a/baiap2l2a/pfn2/elmo1/cnn2/epb41l3b/twf1b/mybpc1/tln1/cobl/dlg1l/smyd2a/sorbs3/myoc/myh10/arpc5lb/srgap2/fscn1a/daam1b/myh9b/sipa1l1/hcls1/myo18aa/cdc42bpb/ttc17/limk1a/fryb/iqsec2b/tmsb1/pfn1
GO:0030036	actin cytoskeleton organization	39	0.222205	0.797494	0.729568	dlg1/ache/ptk2bb/prox1a/rock2a/gsna/pfn2l/coro2a/pls1/vil1/eps8a/baiap2l2a/pfn2/elmo1/cnn2/epb41l3b/twf1b/mybpc1/tln1/cobl/dlg1l/smyd2a/sorbs3/myoc/myh10/arpc5lb/fscn1a/daam1b/myh9b/sipa1l1/hcls1/myo18aa/cdc42bpb/ttc17/limk1a/fryb/iqsec2b/tmsb1/pfn1
GO:0071103	DNA conformation change	12	0.222776	0.797494	0.729568	h1f0/setb/rbbp4/anp32b/h1fx/seta/zgc:173742/nap1l4a/psme4b/top1l/hp1bp3/bahcc1b
GO:0022604	regulation of cell morphogenesis	16	0.22282	0.797494	0.729568	ntn1a/apoeb/stat3/cyfip1/nrp1a/kctd12.1/rbpms2a/brwd3/apoea/myh10/plxnb1a/myh9b/sipa1l1/plxnb1b/epha4a/clstn1
GO:0010243	response to organonitrogen compound	17	0.224131	0.797494	0.729568	march6/ache/ube4b/psmc6/sdf2/stat5a/cpeb4a/baiap2l2a/junba/rab10/cpt1b/erlin1/ankzf1/socs2/tsc2/rragca/foxred2
GO:0009416	response to light stimulus	13	0.225761	0.797494	0.729568	cry1aa/mettl3/per2/msh6/lamc1/tefa/uvssa/per1b/perp/tefb/per1a/cry2/cry5
[truncated: 1,846 more rows]

## Sheet: MF HARA F0F1
	Description	Count	pvalue	p.adjust	qvalue	geneID
[truncated: 664 more rows]
